# Supplementary material for: Only two out of five articles by New Zealand researchers are free-to-access: a multiple API study of access, citations, cost of Article Processing Charges (APC), and the potential to increase the proportion of open access
Source: PeerJ. 2021 May 26;9:e11417. doi: 10.7717/peerj.11417 (PMC8164411; doi:10.7717/peerj.11417)
Supplement: Supplemental Information 1 [file peerj-09-11417-s001.xlsx]

## Sheet: Data
DOI	Evidence	Licence	OA Status	Title	Authors	Author count	Author count>20	Journal	Year	Publisher	Is OA	Genre	NA	OA Journal	Version	Host of best version	Green version available	Repositories	Number of repositories	In DOAJ	ISSNs	Archive accepted manuscript	Archive published version	Sherpa/Romeo colour	Sherpa/Romeo Licence	Crossref citations	Free text url	APC charged in DOAJ	DOAJ Currency	DOAJ APC	Flourish APC (USD)	Publisher Currency	Publisher APC	USD APC	Funders	Subjects	NZ Corresponding author	Only in NZ repository	Health Research Council of New Zealand	Rutherford Discovery Fellowship	Marsden	Royal Society of New Zealand	Ministry of Business, Innovation and Employment	Auckland Medical Research Foundation	NZ Govt	National Institute for Health Research	National Institutes of Health	National Science Foundation (US)	US Government
10.1001/jama.2017.7219	open (via free pdf)		bronze	Effect of Robotic-Assisted vs Conventional Laparoscopic Surgery on Risk of Conversion to Open Laparotomy Among Patients Undergoing Resection for Rectal Cancer	Jayne, David; Pigazzi, Alessio; Marshall, Helen; Croft, Julie; Corrigan, Neil; Copeland, Joanne; Quirke, Phil; West, Nick; Rautio, Tero; Thomassen, Niels; Tilney, Henry; Gudgeon, Mark; Bianchi, Paolo Pietro; Edlin, Richard; Hulme, Claire; Brown, Julia	16	No	JAMA	2017	American Medical Association (AMA)	TRUE	journal-article		FALSE	publishedVersion	publisher	Yes	pubmedcentral.nih.gov	1	FALSE	0098-7484	6 months embargo	Special conditions apply	white		131	https://doi.org/10.1001/jama.2017.7219								Chief Scientist Office in Scotland; National Institute for Social Care and Health Research in Wales; Health and Social Care Research and Development Division Public Health Agency in Northern Ireland; National Institute for Health Research; Yorkshire Cancer Research; Medical Research Council Bioinformatics Initiative; Efficacy and Mechanism Evaluation Programme; Medical Research Council	General & Internal Medicine	No	FALSE	FALSE	FALSE	FALSE	FALSE	FALSE	FALSE	FALSE	TRUE	FALSE	FALSE	FALSE
10.1001/jamacardio.2017.0175	oa repository (via OAI-PMH doi match)		green	Effect of Monthly High-Dose Vitamin D Supplementation on Cardiovascular Disease in the Vitamin D Assessment Study	Scragg, Robert; Stewart, Alistair W.; Waayer, Debbie; Lawes, Carlene M. M.; Toop, Les; Sluyter, John; Murphy, Judy; Khaw, Kay-Tee; Camargo, Carlos A.	9	No	JAMA Cardiology	2017	American Medical Association (AMA)	TRUE	journal-article		FALSE	publishedVersion	repository	Yes	pubmedcentral.nih.gov	1	FALSE	2380-6583	12 months embargo	Special conditions apply	white		80	http://europepmc.org/articles/pmc5815022								Health Research Council of New Zealand [10/400]; Accident Compensation Corporation of New Zealand	Cardiovascular System & Cardiology	Yes	FALSE	TRUE	FALSE	FALSE	FALSE	FALSE	FALSE	TRUE	FALSE	FALSE	FALSE	FALSE
10.1001/jamacardio.2017.2941			closed	Vitamin D Supplementation and Cardiovascular Disease Riskâ€”Reply	Scragg, Robert; Camargo, Carlos A.	2	No	JAMA Cardiology	2017	American Medical Association (AMA)	FALSE	journal-article		FALSE			No		0	FALSE	2380-6583	12 months embargo	Special conditions apply	white		0									Health Research Council of New Zealand; Accident Compensation Commission	Cardiovascular System & Cardiology	Yes	FALSE	TRUE	FALSE	FALSE	FALSE	FALSE	FALSE	TRUE	FALSE	FALSE	FALSE	FALSE
10.1001/jamapediatrics.2017.1579	open (via free pdf)		bronze	Association of Neonatal Glycemia With Neurodevelopmental Outcomes at 4.5 Years	Mckinlay, Christopher J. D.; Alsweiler, Jane M.; Anstice, Nicola S.; Burakevych, Nataliia; Chakraborty, Arijit; Chase, J. Geoffrey; Gamble, Gregory D.; Harris, Deborah L.; Jacobs, Robert J.; Jiang, Yannan; Paudel, Nabin; San Diego, Ryan J.; Thompson, Benjamin; Wouldes, Trecia A.; Harding, Jane E.	15	No	JAMA Pediatrics	2017	American Medical Association (AMA)	TRUE	journal-article		FALSE	publishedVersion	publisher	No		0	FALSE	2168-6203	12 months embargo	Special conditions apply	white		38	https://doi.org/10.1001/jamapediatrics.2017.1579								Eunice Kennedy Shriver National Institute of Child Health and Human Development [R01HD069622]; Health Research Council of New Zealand [10-399]; Auckland Medical Research Foundation; Gravida National Research Centre for Growth and Development New Zealand	Pediatrics	Yes	FALSE	TRUE	FALSE	FALSE	FALSE	FALSE	TRUE	TRUE	FALSE	FALSE	FALSE	FALSE
10.1001/jamapsychiatry.2016.4234	open (via free pdf)		bronze	Paternal Depression Symptoms During Pregnancy and After Childbirth Among Participants in the Growing Up in New Zealand Study	Underwood, Lisa; Waldie, Karen E.; Peterson, Elizabeth; D\\U2019Souza, Stephanie; Verbiest, Marjolein; Mcdaid, Frances; Morton, Susan	7	No	JAMA Psychiatry	2017	American Medical Association (AMA)	TRUE	journal-article		FALSE	publishedVersion	publisher	Yes	pubmedcentral.nih.gov	1	FALSE	2168-622X	12 months embargo	Special conditions apply	white		16	https://doi.org/10.1001/jamapsychiatry.2016.4234								New Zealand Ministries of Social Development Health Education Justice and Pacific Island Affairs; Ministry of Business Innovation and Employment; Ministry for Women; Department of Corrections; Social Policy Evaluation and Research Unit; Te Puni Kokiri; New Zealand Police; Sport New Zealand; Housing New Zealand Corporation; New Zealand Health Research Council; Statistics New Zealand; Office of the…	Psychiatry	Yes	FALSE	TRUE	FALSE	FALSE	FALSE	TRUE	FALSE	TRUE	FALSE	FALSE	FALSE	FALSE
10.1001/jamapsychiatry.2017.1400			closed	Assessing Depression Among New Fathersâ€”Reply	Underwood, Lisa; Morton, Susan M. B.; Waldie, Karen E.	3	No	JAMA Psychiatry	2017	American Medical Association (AMA)	FALSE	journal-article		FALSE			No		0	FALSE	2168-622X	12 months embargo	Special conditions apply	white		0										Psychiatry	Yes	FALSE	FALSE	FALSE	FALSE	FALSE	FALSE	FALSE	FALSE	FALSE	FALSE	FALSE	FALSE
10.1001/jamapsychiatry.2017.2410			closed	Effectiveness and Safety of Antidepressants for Children and Adolescents	Merry, Sally Nicola; Hetrick, Sarah Elisabeth; Stasiak, Karolina	3	No	JAMA Psychiatry	2017	American Medical Association (AMA)	FALSE	journal-article		FALSE			No		0	FALSE	2168-622X	12 months embargo	Special conditions apply	white		1									SPARX	Psychiatry	Yes	FALSE	FALSE	FALSE	FALSE	FALSE	FALSE	FALSE	FALSE	FALSE	FALSE	FALSE	FALSE
10.1001/jamasurg.2017.0112			closed	Time to Embrace the Digital Age in Health Care	Sammour, Tarik; Hill, Andrew G.	2	No	JAMA Surgery	2017	American Medical Association (AMA)	FALSE	journal-article		FALSE			No		0	FALSE	2168-6254	12 months embargo	Special conditions apply	white		0										Surgery	Yes	FALSE	FALSE	FALSE	FALSE	FALSE	FALSE	FALSE	FALSE	FALSE	FALSE	FALSE	FALSE
10.1002/14651858.CD000356.pub4	open (via free pdf)		bronze	Early discharge hospital at home	Gon\\U00E7Alves-Bradley, Daniela C; Iliffe, Steve; Doll, Helen A; Broad, Joanna; Gladman, John; Langhorne, Peter; Richards, Suzanne H; Shepperd, Sasha	8	No	Cochrane Database of Systematic Reviews	2017	John Wiley & Sons, Ltd	TRUE	reference-entry		FALSE	publishedVersion	publisher	Yes	eprints.gla.ac.uk researchonline.lshtm.ac.uk ore.exeter.ac.uk	3	FALSE	null					4	https://www.cochranelibrary.com/cdsr/doi/10.1002/14651858.CD000356.pub4/media/CDSR/CD000356/CD000356.pdf								Anglia and Oxford NHS Research and Development Programme UK; NIHR Research Scientist in Evidence Synthesis Award UK	General & Internal Medicine	No	FALSE	FALSE	FALSE	FALSE	FALSE	FALSE	FALSE	FALSE	TRUE	FALSE	FALSE	FALSE
10.1002/14651858.CD001390.pub4	open (via free pdf)		bronze	Pneumococcal vaccines for preventing pneumonia in chronic obstructive pulmonary disease	Walters, Julia Ae; Tang, Joanne Ngie Qing; Poole, Phillippa; Wood-Baker, Richard	4	No	Cochrane Database of Systematic Reviews	2017	John Wiley & Sons, Ltd	TRUE	reference-entry		FALSE	publishedVersion	publisher	Yes	eprints.utas.edu.au	1	FALSE	null					3	https://www.cochranelibrary.com/cdsr/doi/10.1002/14651858.CD001390.pub4/media/CDSR/CD001390/CD001390.pdf								University of Tasmania; NHMRC; Asthma Foundation Tasmania	General & Internal Medicine	No	FALSE	FALSE	FALSE	FALSE	FALSE	FALSE	FALSE	FALSE	FALSE	FALSE	FALSE	FALSE
10.1002/14651858.cd003310.pub2	open (via free pdf)		bronze	Calcium and phosphorus supplementation of human milk for preterm infants	Harding, Jane E; Wilson, Jess; Brown, Julie	3	No	Cochrane Database of Systematic Reviews	2017	John Wiley & Sons, Ltd	TRUE	reference-entry		FALSE	publishedVersion	publisher	No		0	FALSE	null					0	https://www.cochranelibrary.com/cdsr/doi/10.1002/14651858.CD003310.pub2/media/CDSR/CD003310/CD003310.pdf										No	FALSE	FALSE	FALSE	FALSE	FALSE	FALSE	FALSE	FALSE	FALSE	FALSE	FALSE	FALSE
10.1002/14651858.cd004454.pub3			closed	Antenatal corticosteroids for accelerating fetal lung maturation for women at risk of preterm birth	Roberts, Devender; Brown, Julie; Medley, Nancy; Dalziel, Stuart R	4	No	Cochrane Database of Systematic Reviews	2017	John Wiley & Sons, Ltd	FALSE	reference-entry		FALSE			No		0	FALSE	null					42											No	FALSE	FALSE	FALSE	FALSE	FALSE	FALSE	FALSE	FALSE	FALSE	FALSE	FALSE	FALSE
10.1002/14651858.cd004637.pub2	open (via free pdf)		bronze	Antibiotic prophylaxis for elective hysterectomy	Ayeleke, Reuben Olugbenga; Mourad, Selma M.; Marjoribanks, Jane; Calis, Karim A; Jordan, Vanessa	5	No	Cochrane Database of Systematic Reviews	2017	John Wiley & Sons, Ltd	TRUE	reference-entry		FALSE	publishedVersion	publisher	No		0	FALSE	null					1	https://www.cochranelibrary.com/cdsr/doi/10.1002/14651858.CD004637.pub2/media/CDSR/CD004637/CD004637.pdf										No	FALSE	FALSE	FALSE	FALSE	FALSE	FALSE	FALSE	FALSE	FALSE	FALSE	FALSE	FALSE
10.1002/14651858.CD004735.pub4			closed	Planned early birth versus expectant management for women with preterm prelabour rupture of membranes prior to 37 weeks' gestation for improving pregnancy outcome	Bond, Diana M; Middleton, Philippa; Levett, Kate M; Van Der Ham, David P; Crowther, Caroline A; Buchanan, Sarah L; Morris, Jonathan	7	No	Cochrane Database of Systematic Reviews	2017	John Wiley & Sons, Ltd	FALSE	reference-entry		FALSE			No		0	FALSE	null					7									The University of Sydney Discipline of Obstetrics and Gynaecology Australia; The University of Adelaide Discipline of Obstetrics and Gynaecology Australia; The Liggins Institute University of Auckland New Zealand; ARCH: Australian Research Centre for Health of Women and Babies Robinson Research Institute The University of Adelaide Australia; Department of Health and Ageing Australia; National Ins…	General & Internal Medicine	No	FALSE	FALSE	FALSE	FALSE	FALSE	FALSE	FALSE	FALSE	TRUE	FALSE	FALSE	FALSE
10.1002/14651858.cd004753.pub4	oa repository (via OAI-PMH title and first author match)		green	Nonsteroidal anti-inflammatory drugs for pain in women with endometriosis	Brown, Julie; Crawford, Tineke J; Allen, Claire; Hopewell, Sally; Prentice, Andrew	5	No	Cochrane Database of Systematic Reviews	2017	John Wiley & Sons, Ltd	TRUE	reference-entry		FALSE	submittedVersion	repository	Yes	www.repository.cam.ac.uk	1	FALSE	null					7	https://www.repository.cam.ac.uk/bitstream/1810/263381/1/Review%20Manager%205%20copy.pdf										No	FALSE	FALSE	FALSE	FALSE	FALSE	FALSE	FALSE	FALSE	FALSE	FALSE	FALSE	FALSE
10.1002/14651858.CD004906.pub5	open (via free pdf)		bronze	Elective repeat caesarean section versus induction of labour for women with a previous caesarean birth	Dodd, Jodie M; Crowther, Caroline A; Grivell, Rosalie M; Deussen, Andrea R	4	No	Cochrane Database of Systematic Reviews	2017	Wiley-Blackwell	TRUE	journal-article		FALSE	publishedVersion	publisher	No		0	FALSE	1465-1858	12 months embargo	cannot	yellow		0	https://www.cochranelibrary.com/cdsr/doi/10.1002/14651858.CD004906.pub5/media/CDSR/CD004906/CD004906.pdf					USD	3000	3000	National Institute for Health Research via Cochrane Programme Grant funding; University of Adelaide Department of Obstetrics and Gynaecology Australia; University of Auckland The Liggins Institute New Zealand; Neil Hamilton Fairley Fellowship; NHMRC Australia [399224]; National Institute for Health Research UK; NIHR Cochrane Programme [13/89/05]; National Health and Medical Research Council (NHMR…	General & Internal Medicine	No	FALSE	FALSE	FALSE	FALSE	FALSE	FALSE	FALSE	FALSE	TRUE	FALSE	FALSE	FALSE
10.1002/14651858.CD005302.pub3	open (via free pdf)		bronze	Planned early birth versus expectant management (waiting) for prelabour rupture of membranes at term (37 weeks or more)	Middleton, Philippa; Shepherd, Emily; Flenady, Vicki; Mcbain, Rosemary D; Crowther, Caroline A	5	No	Cochrane Database of Systematic Reviews	2017	John Wiley & Sons, Ltd	TRUE	reference-entry		FALSE	publishedVersion	publisher	No		0	FALSE	null					6	https://www.cochranelibrary.com/cdsr/doi/10.1002/14651858.CD005302.pub3/media/CDSR/CD005302/CD005302.pdf								ARCH: Australian Research Centre for Health of Women and Babies Robinson Research Institute The University of Adelaide Australia; NHS Programme for Research and Development UK; National Health and Medical Research Council Australia; National Institute for Health Research (NIHR) UK; NIHR [13/89/05]	General & Internal Medicine	No	FALSE	FALSE	FALSE	FALSE	FALSE	FALSE	FALSE	FALSE	TRUE	FALSE	FALSE	FALSE
10.1002/14651858.CD006109.pub3	open (via free pdf)		bronze	Oral contraceptive pill, progestogen or oestrogen pretreatment for ovarian stimulation protocols for women undergoing assisted reproductive techniques	Farquhar, Cindy; Rombauts, Luk; Kremer, Jan Am; Lethaby, Anne; Ayeleke, Reuben Olugbenga	5	No	Cochrane Database of Systematic Reviews	2017	Wiley-Blackwell	TRUE	journal-article		FALSE	publishedVersion	publisher	No		0	FALSE	1465-1858	12 months embargo	cannot	yellow		3	https://www.cochranelibrary.com/cdsr/doi/10.1002/14651858.CD006109.pub3/media/CDSR/CD006109/CD006109.pdf					USD	3000	3000	University of Nijmegen; Stichting Nijmeegs Universiteitsfonds (SNUF) Netherlands; CVSB (Commissie Voorzieningen Studenten Budget) Netherlands	General & Internal Medicine	Yes	FALSE	FALSE	FALSE	FALSE	FALSE	FALSE	FALSE	FALSE	FALSE	FALSE	FALSE	FALSE
10.1002/14651858.CD006674.pub3	open (via free pdf)		bronze	Dietary advice interventions in pregnancy for preventing gestational diabetes mellitus	Tieu, Joanna; Shepherd, Emily; Middleton, Philippa; Crowther, Caroline A	4	No	Cochrane Database of Systematic Reviews	2017	John Wiley & Sons, Ltd	TRUE	reference-entry		FALSE	publishedVersion	publisher	No		0	FALSE	null					10	https://www.cochranelibrary.com/cdsr/doi/10.1002/14651858.CD006674.pub3/media/CDSR/CD006674/CD006674.pdf								ARCH: Australian Research Centre for Health of Women and Babies Robinson Research Institute The University of Adelaide Australia; NHMRC: National Health and Medical Research Council Australia; National Institute for Health Research (NIHR) UKNIHR Cochrane Programme Grant [13/89/05]	General & Internal Medicine	No	FALSE	FALSE	FALSE	FALSE	FALSE	FALSE	FALSE	FALSE	TRUE	FALSE	FALSE	FALSE
10.1002/14651858.CD007222.pub4			closed	Screening for gestational diabetes mellitus based on different risk profiles and settings for improving maternal and infant health	Tieu, Joanna; Mcphee, Andrew J; Crowther, Caroline A; Middleton, Philippa; Shepherd, Emily	5	No	Cochrane Database of Systematic Reviews	2017	Wiley-Blackwell	FALSE	journal-article		FALSE			No		0	FALSE	1465-1858	12 months embargo	cannot	yellow		2						USD	3000	3000	ARCH: Australian Research Centre for Health of Women and Babies Robinson Research Institute The University of Adelaide Australia; NHMRC: National Health and Medical Research Council Australia; NIHR: National Institute for Health Research UK; Cochrane Programme Grant [13/89/05]	General & Internal Medicine	No	FALSE	FALSE	FALSE	FALSE	FALSE	FALSE	FALSE	FALSE	TRUE	FALSE	FALSE	FALSE
10.1002/14651858.CD007776.pub3	open (via free pdf)		bronze	Preconception care for diabetic women for improving maternal and infant health	Tieu, Joanna; Middleton, Philippa; Crowther, Caroline A; Shepherd, Emily	4	No	Cochrane Database of Systematic Reviews	2017	Wiley-Blackwell	TRUE	journal-article		FALSE	publishedVersion	publisher	No		0	FALSE	1465-1858	12 months embargo	cannot	yellow		3	https://www.cochranelibrary.com/cdsr/doi/10.1002/14651858.CD007776.pub3/media/CDSR/CD007776/CD007776.pdf					USD	3000	3000	ARCH: Australian Research Centre for Health of Women and Babies Robinson Research Institute The University of Adelaide Australia; NHMRC: National Health and Medical Research Council Australia; NIHR: National Institute for Health Research UK; NIHR Cochrane Programme Grant [13/89/05]	General & Internal Medicine	No	FALSE	FALSE	FALSE	FALSE	FALSE	FALSE	FALSE	FALSE	TRUE	FALSE	FALSE	FALSE
10.1002/14651858.CD007807.pub3			closed	Antioxidants for female subfertility	Showell, Marian G; Mackenzie-Proctor, Rebecca; Jordan, Vanessa; Hart, Roger J	4	No	Cochrane Database of Systematic Reviews	2017	Wiley-Blackwell	FALSE	journal-article		FALSE			No		0	FALSE	1465-1858	12 months embargo	cannot	yellow		5						USD	3000	3000		General & Internal Medicine	Yes	FALSE	FALSE	FALSE	FALSE	FALSE	FALSE	FALSE	FALSE	FALSE	FALSE	FALSE	FALSE
10.1002/14651858.CD008559.pub3	oa repository (via OAI-PMH title and first author match)		green	Atypical antipsychotics for disruptive behaviour disorders in children and youths	Loy, Jik H; Merry, Sally N; Hetrick, Sarah E; Stasiak, Karolina	4	No	Cochrane Database of Systematic Reviews	2017	Wiley-Blackwell	TRUE	journal-article		FALSE	publishedVersion	repository	Yes	jupiter.its.unimelb.edu.au	1	FALSE	1465-1858	12 months embargo	cannot	yellow		6	http://minerva-access.unimelb.edu.au/bitstream/11343/59236/1/Loy%20et%20al%202010%20SR%20protocol%20antipsychotics%20for%20disruptive%20behaviour.pdf					USD	3000	3000	Waikato District Health Board New Zealand	General & Internal Medicine	No	FALSE	FALSE	FALSE	FALSE	FALSE	FALSE	FALSE	FALSE	FALSE	FALSE	FALSE	FALSE
10.1002/14651858.CD008680.pub2	open (via free pdf)		bronze	Intermittent auscultation (IA) of fetal heart rate in labour for fetal well-being	Martis, Ruth; Emilia, Ova; Nurdiati, Detty S; Brown, Julie	4	No	Cochrane Database of Systematic Reviews	2017	John Wiley & Sons, Ltd	TRUE	reference-entry		FALSE	publishedVersion	publisher	No		0	FALSE	null					1	https://www.cochranelibrary.com/cdsr/doi/10.1002/14651858.CD008680.pub2/media/CDSR/CD008680/CD008680.pdf								Christchurch Polytechnic Institute of Technology CPIT New Zealand; Department of Health Science and Allied Health ARC committee; Faculty of Medicine Universitas Gadjah Mada Yogyakarta Indonesia; Liggins Institute Univeristy of Auckland New Zealand	General & Internal Medicine	Yes	FALSE	FALSE	FALSE	FALSE	FALSE	FALSE	FALSE	FALSE	FALSE	FALSE	FALSE	FALSE
10.1002/14651858.CD009275.pub3	open (via free pdf)		bronze	Different types of dietary advice for women with gestational diabetes mellitus	Han, Shanshan; Middleton, Philippa; Shepherd, Emily; Van Ryswyk, Emer; Crowther, Caroline A	5	No	Cochrane Database of Systematic Reviews	2017	John Wiley & Sons, Ltd	TRUE	reference-entry		FALSE	publishedVersion	publisher	No		0	FALSE	null					10	https://www.cochranelibrary.com/cdsr/doi/10.1002/14651858.CD009275.pub3/media/CDSR/CD009275/CD009275.pdf								ARCH Robinson Research Institute The University of Adelaide Australia; NHMRC: National Health and Medical Research Council Australia; National Institute for Health Research (NIHR) UK; Cochrane Programme Grant Project [13/89/05]	General & Internal Medicine	No	FALSE	FALSE	FALSE	FALSE	FALSE	FALSE	FALSE	FALSE	TRUE	FALSE	FALSE	FALSE
10.1002/14651858.CD010211.pub3			closed	Interconception care for women with a history of gestational diabetes for improving maternal and infant outcomes	Tieu, Joanna; Shepherd, Emily; Middleton, Philippa; Crowther, Caroline A	4	No	Cochrane Database of Systematic Reviews	2017	Wiley-Blackwell	FALSE	journal-article		FALSE			No		0	FALSE	1465-1858	12 months embargo	cannot	yellow		1						USD	3000	3000	ARCH: Australian Research Centre for Health of Women and Babies Robinson Research Institute The University of Adelaide Australia; Department of Health and Ageing Australia; NHMRC: National Health and Medical Research Council Australia; NIHR: National Institute for Health Research UK; NIHR Cochrane Programme Grant Project [13/89/05]	General & Internal Medicine	No	FALSE	FALSE	FALSE	FALSE	FALSE	FALSE	FALSE	FALSE	TRUE	FALSE	FALSE	FALSE
10.1002/14651858.CD010443.pub3	open (via free pdf)		bronze	Combined diet and exercise interventions for preventing gestational diabetes mellitus	Shepherd, Emily; Gomersall, Judith C; Tieu, Joanna; Han, Shanshan; Crowther, Caroline A; Middleton, Philippa	6	No	Cochrane Database of Systematic Reviews	2017	Wiley-Blackwell	TRUE	journal-article		FALSE	publishedVersion	publisher	No		0	FALSE	1465-1858	12 months embargo	cannot	yellow		6	https://www.cochranelibrary.com/cdsr/doi/10.1002/14651858.CD010443.pub3/media/CDSR/CD010443/CD010443.pdf					USD	3000	3000	ARCH: Australian Research Centre for Health of Women and Babies Robinson Research Institute The University of Adelaide Australia; Healthy Mothers Babies and Children SAHMRI: South Australian Health and Medical Research Institute Adelaide Australia; Liggins Institute The University of Auckland Auckland New Zealand; NHMRC: National Health and Medical Research Council Australia; NIHR: National Insti…	General & Internal Medicine	No	FALSE	FALSE	FALSE	FALSE	FALSE	FALSE	FALSE	FALSE	TRUE	FALSE	FALSE	FALSE
10.1002/14651858.CD011069.pub2	open (via free pdf)		bronze	Different methods and settings for glucose monitoring for gestational diabetes during pregnancy	Raman, Puvaneswary; Shepherd, Emily; Dowswell, Therese; Middleton, Philippa; Crowther, Caroline A	5	No	Cochrane Database of Systematic Reviews	2017	Wiley-Blackwell	TRUE	journal-article		FALSE	publishedVersion	publisher	No		0	FALSE	1465-1858	12 months embargo	cannot	yellow		6	https://www.cochranelibrary.com/cdsr/doi/10.1002/14651858.CD011069.pub2/media/CDSR/CD011069/CD011069.pdf					USD	3000	3000	Australian Research Centre for Health of Women and Babies (ARCH) Robinson Research Institute The University of Adelaide Adelaide Australia; Healthy Mothers Babies and Children South Australian Health and Medical Research Institute (SAHMRI) Adelaide Australia; Liggins Institute The University of Auckland Auckland New Zealand; National Health and Medical Research Council Australia; National Institu…	General & Internal Medicine	No	FALSE	FALSE	FALSE	FALSE	FALSE	FALSE	FALSE	FALSE	TRUE	FALSE	FALSE	FALSE
10.1002/14651858.CD011307.pub2	open (via free pdf)		bronze	Interventions to improve access to cataract surgical services and their impact on equity in low- and middle-income countries	Ramke, Jacqueline; Petkovic, Jennifer; Welch, Vivian; Blignault, Ilse; Gilbert, Clare; Blanchet, Karl; Christensen, Robin; Zwi, Anthony B; Tugwell, Peter	9	No	Cochrane Database of Systematic Reviews	2017	Wiley-Blackwell	TRUE	journal-article		FALSE	publishedVersion	publisher	Yes	researchonline.lshtm.ac.uk	1	FALSE	1465-1858	12 months embargo	cannot	yellow		0	https://www.cochranelibrary.com/cdsr/doi/10.1002/14651858.CD011307.pub2/media/CDSR/CD011307/CD011307.pdf					USD	3000	3000	National Institute for Health Research (NIHR) UK; Department of Health through National Institute for Health Research; National Institute for Health Research via Cochrane Infrastructure funding	General & Internal Medicine	Yes	FALSE	FALSE	FALSE	FALSE	FALSE	FALSE	FALSE	FALSE	TRUE	FALSE	FALSE	FALSE
10.1002/14651858.CD011524.pub2	open (via free pdf)		bronze	Consumer-delivered training in intimate examination skills for healthcare students and professionals	Duffy, James Mn; Eyo, Mary M; Rolph, Rachel; Showell, Marian G; Cushing, Anne M; Khan, Khalid	6	No	Cochrane Database of Systematic Reviews	2017	John Wiley & Sons, Ltd	TRUE	reference-entry		FALSE	publishedVersion	publisher	No		0	FALSE	null					0	https://www.cochranelibrary.com/cdsr/doi/10.1002/14651858.CD011524.pub2/media/CDSR/CD011524/CD011524.pdf										No	FALSE	FALSE	FALSE	FALSE	FALSE	FALSE	FALSE	FALSE	FALSE	FALSE	FALSE	FALSE
10.1002/14651858.cd011967.pub2	open (via free pdf)		bronze	Oral anti-diabetic pharmacological therapies for the treatment of women with gestational diabetes	Brown, Julie; Martis, Ruth; Hughes, Brenda; Rowan, Janet; Crowther, Caroline A	5	No	Cochrane Database of Systematic Reviews	2017	John Wiley & Sons, Ltd	TRUE	reference-entry		FALSE	publishedVersion	publisher	No		0	FALSE	null					12	https://www.cochranelibrary.com/cdsr/doi/10.1002/14651858.CD011967.pub2/media/CDSR/CD011967/CD011967.pdf										No	FALSE	FALSE	FALSE	FALSE	FALSE	FALSE	FALSE	FALSE	FALSE	FALSE	FALSE	FALSE
10.1002/14651858.cd011970.pub2			closed	Lifestyle interventions for the treatment of women with gestational diabetes	Brown, Julie; Alwan, Nisreen A; West, Jane; Brown, Stephen; Mckinlay, Christopher Jd; Farrar, Diane; Crowther, Caroline A	7	No	Cochrane Database of Systematic Reviews	2017	John Wiley & Sons, Ltd	FALSE	reference-entry		FALSE			No		0	FALSE	null					19											No	FALSE	FALSE	FALSE	FALSE	FALSE	FALSE	FALSE	FALSE	FALSE	FALSE	FALSE	FALSE
10.1002/14651858.CD012037.pub2	open (via free pdf)		bronze	Insulin for the treatment of women with gestational diabetes	Brown, Julie; Grzeskowiak, Luke; Williamson, Kathryn; Downie, Michelle R; Crowther, Caroline A	5	No	Cochrane Database of Systematic Reviews	2017	Wiley-Blackwell	TRUE	journal-article		FALSE	publishedVersion	publisher	No		0	FALSE	1465-1858	12 months embargo	cannot	yellow		4	https://www.cochranelibrary.com/cdsr/doi/10.1002/14651858.CD012037.pub2/media/CDSR/CD012037/CD012037.pdf					USD	3000	3000	internal University of Auckland Departmental Grant New Zealand; internal University of Auckland grant from the Liggins Institute; Liggins Institute New Zealand; Liggins Institute University of Auckland New Zealand; National Institute for Health Research (NIHR) UK; NIHR Cochrane Programme [13/89/05]	General & Internal Medicine	Yes	FALSE	FALSE	FALSE	FALSE	FALSE	FALSE	FALSE	FALSE	TRUE	FALSE	FALSE	FALSE
10.1002/14651858.CD012077.pub2	open (via free pdf)		bronze	Antenatal and intrapartum interventions for preventing cerebral palsy: an overview of Cochrane systematic reviews	Shepherd, Emily; Salam, Rehana A; Middleton, Philippa; Makrides, Maria; Mcintyre, Sarah; Badawi, Nadia; Crowther, Caroline A	7	No	Cochrane Database of Systematic Reviews	2017	Wiley-Blackwell	TRUE	journal-article		FALSE	publishedVersion	publisher	No		0	FALSE	1465-1858	12 months embargo	cannot	yellow		4	https://www.cochranelibrary.com/cdsr/doi/10.1002/14651858.CD012077.pub2/media/CDSR/CD012077/CD012077.pdf					USD	3000	3000	ARCH: Australian Research Centre for Health of Women and Babies; Robinson Research Institute Discipline of Obstetrics and Gynaecology The University of Adelaide Australia; National Health and Medical Research Council Australia; Cerebral Palsy Alliance Research Foundation Australia; [PG0914]	General & Internal Medicine	No	FALSE	FALSE	FALSE	FALSE	FALSE	FALSE	FALSE	FALSE	FALSE	FALSE	FALSE	FALSE
10.1002/14651858.cd012103.pub2	open (via free pdf)		bronze	Interventions for the prevention of OHSS in ART cycles: an overview of Cochrane reviews	Mourad, Selma; Brown, Julie; Farquhar, Cindy	3	No	Cochrane Database of Systematic Reviews	2017	John Wiley & Sons, Ltd	TRUE	reference-entry		FALSE	publishedVersion	publisher	No		0	FALSE	null					4	https://www.cochranelibrary.com/cdsr/doi/10.1002/14651858.CD012103.pub2/media/CDSR/CD012103/CD012103.pdf										No	FALSE	FALSE	FALSE	FALSE	FALSE	FALSE	FALSE	FALSE	FALSE	FALSE	FALSE	FALSE
10.1002/14651858.CD012152.pub2	open (via free pdf)		bronze	Oral dextrose gel to prevent hypoglycaemia in at-risk neonates	Hegarty, Joanne E; Harding, Jane E; Crowther, Caroline A; Brown, Julie; Alsweiler, Jane	5	No	Cochrane Database of Systematic Reviews	2017	Wiley-Blackwell	TRUE	journal-article		FALSE	publishedVersion	publisher	No		0	FALSE	1465-1858	12 months embargo	cannot	yellow		0	https://www.cochranelibrary.com/cdsr/doi/10.1002/14651858.CD012152.pub2/media/CDSR/CD012152/CD012152.pdf					USD	3000	3000	National Research Centre for Growth and Development New Zealand; Auckland District Health Board New Zealand; Liggins Institute University of Auckland New Zealand; Eunice Kennedy Shriver National Institute of Child Health and Human Development National Institutes of Health Department of Health and Human Services USA; Eunice Kennedy Shriver National Institute of Child Health and Human Development N…	General & Internal Medicine	Yes	FALSE	FALSE	FALSE	FALSE	FALSE	FALSE	FALSE	FALSE	FALSE	TRUE	FALSE	TRUE
10.1002/14651858.CD012202.pub2	open (via free pdf)		bronze	Exercise for pregnant women with gestational diabetes for improving maternal and fetal outcomes	Brown, Julie; Ceysens, Gilles; Boulvain, Michel	3	No	Cochrane Database of Systematic Reviews	2017	John Wiley & Sons, Ltd	TRUE	reference-entry		FALSE	publishedVersion	publisher	No		0	FALSE	null					9	https://www.cochranelibrary.com/cdsr/doi/10.1002/14651858.CD012202.pub2/media/CDSR/CD012202/CD012202.pdf								Liggins Institute University of Auckland New Zealand; National Institute for Health Research (NIHR) UK; NIHR Cochrane Programme Grant [13/89/05]	General & Internal Medicine	Yes	FALSE	FALSE	FALSE	FALSE	FALSE	FALSE	FALSE	FALSE	TRUE	FALSE	FALSE	FALSE
10.1002/14651858.CD012488	open (via free pdf)		bronze	Psychological therapies for anxiety and depression in children and adolescents with long-term physical conditions	Thabrew, Hiran; Stasiak, Karolina; Hetrick, Sarah E; Wong, Stephen; Huss, Jessica H; Merry, Sally N	6	No	Cochrane Database of Systematic Reviews	2017	John Wiley & Sons, Ltd	TRUE	reference-entry		FALSE	publishedVersion	publisher	No		0	FALSE	null					1	https://www.cochranelibrary.com/cdsr/doi/10.1002/14651858.CD012488/media/CDSR/CD012488/rel0001/CD012488/CD012488.pdf										Yes	FALSE	FALSE	FALSE	FALSE	FALSE	FALSE	FALSE	FALSE	FALSE	FALSE	FALSE	FALSE
10.1002/14651858.CD012489			closed	eHealth interventions for anxiety and depression in children and adolescents with long-term physical conditions	Thabrew, Hiran; Stasiak, Karolina; Hetrick, Sarah E; Wong, Stephen; Huss, Jessica H; Merry, Sally N	6	No	Cochrane Database of Systematic Reviews	2017	John Wiley & Sons, Ltd	FALSE	reference-entry		FALSE			No		0	FALSE	null					2											Yes	FALSE	FALSE	FALSE	FALSE	FALSE	FALSE	FALSE	FALSE	FALSE	FALSE	FALSE	FALSE
10.1002/14651858.CD012537.pub2			closed	Non-steroidal anti-inflammatory drugs (NSAIDs) for chronic non-cancer pain in children and adolescents	Eccleston, Christopher; Cooper, Tess E; Fisher, Emma; Anderson, Brian; Wilkinson, Nick Mr	5	No	Cochrane Database of Systematic Reviews	2017	Wiley-Blackwell	FALSE	journal-article		FALSE			No		0	FALSE	1465-1858	12 months embargo	cannot	yellow		9						USD	3000	3000	National Institute for Health Research (NIHR) UK; NIHR [13/89/29]	General & Internal Medicine	No	FALSE	FALSE	FALSE	FALSE	FALSE	FALSE	FALSE	FALSE	TRUE	FALSE	FALSE	FALSE
10.1002/14651858.CD012539.pub2	oa repository (via OAI-PMH title and first author match)		green	Paracetamol (acetaminophen) for chronic non-cancer pain in children and adolescents	Cooper, Tess E; Fisher, Emma; Anderson, Brian; Wilkinson, Nick Mr; Williams, David G; Eccleston, Christopher	6	No	Cochrane Database of Systematic Reviews	2017	Wiley-Blackwell	TRUE	journal-article		FALSE	publishedVersion	repository	Yes	archive.ugent.be opus.bath.ac.uk	2	FALSE	1465-1858	12 months embargo	cannot	yellow		7	https://biblio.ugent.be/publication/8553949/file/8553950.pdf					USD	3000	3000	National Institute for Health Research (NIHR) UK; NIHR Programme [13/89/29]	General & Internal Medicine	No	FALSE	FALSE	FALSE	FALSE	FALSE	FALSE	FALSE	FALSE	TRUE	FALSE	FALSE	FALSE
10.1002/14651858.CD012558	oa repository (via OAI-PMH title and first author match)		green	Clinical judgement by primary care physicians for the diagnosis of all-cause dementia or cognitive impairment in symptomatic people	Creavin, Sam T; Noel-Storr, Anna H; Richard, Edo; Creavin, Alexandra L; Cullum, Sarah; Ben-Shlomo, Yoav; Purdy, Sarah	7	No	Cochrane Database of Systematic Reviews	2017	John Wiley & Sons, Ltd	TRUE	reference-entry		FALSE	publishedVersion	repository	Yes	research-information.bris.ac.uk	1	FALSE	null					0	https://research-information.bristol.ac.uk/files/155735222/Creavin_et_al_2017_.pdf										No	FALSE	FALSE	FALSE	FALSE	FALSE	FALSE	FALSE	FALSE	FALSE	FALSE	FALSE	FALSE
10.1002/14651858.CD012563.pub2	open (via free pdf)		bronze	Non-steroidal anti-inflammatory drugs (NSAIDs) for cancer-related pain in children and adolescents	Cooper, Tess E; Heathcote, Lauren C; Anderson, Brian; Gr\\U00E9Goire, Marie-Claude; Ljungman, Gustaf; Eccleston, Christopher	6	No	Cochrane Database of Systematic Reviews	2017	Wiley-Blackwell	TRUE	journal-article		FALSE	publishedVersion	publisher	Yes	opus.bath.ac.uk	1	FALSE	1465-1858	12 months embargo	cannot	yellow		6	https://www.cochranelibrary.com/cdsr/doi/10.1002/14651858.CD012563.pub2/media/CDSR/CD012563/CD012563.pdf					USD	3000	3000	National Institute for Health Research (NIHR) UK; NIHR Programme Grant [13/89/29]	General & Internal Medicine	No	FALSE	FALSE	FALSE	FALSE	FALSE	FALSE	FALSE	FALSE	TRUE	FALSE	FALSE	FALSE
10.1002/14651858.CD012572	open (via free pdf)		bronze	Withdrawal of antihypertensive drugs in older people	Babar, Zaheer-Ud-Din; Gammie, Todd M; Gnjidic, Danijela; Reeve, Emily; Jordan, Vanessa; Hilmer, Sarah N; Hopper, Ingrid; Lu, Christine Y	8	No	Cochrane Database of Systematic Reviews	2017	John Wiley & Sons, Ltd	TRUE	reference-entry		FALSE	publishedVersion	publisher	No		0	FALSE	null					0	https://www.cochranelibrary.com/cdsr/doi/10.1002/14651858.CD012572/media/CDSR/CD012572/CD012572.pdf										No	FALSE	FALSE	FALSE	FALSE	FALSE	FALSE	FALSE	FALSE	FALSE	FALSE	FALSE	FALSE
10.1002/14651858.CD012658	open (via free pdf)		bronze	Levonorgestrel-releasing intrauterine system for endometrial hyperplasia	Wise, Michelle R; Farrant, Charlotte; Coop, Catherine	3	No	Cochrane Database of Systematic Reviews	2017	John Wiley & Sons, Ltd	TRUE	reference-entry		FALSE	publishedVersion	publisher	No		0	FALSE	null					0	https://www.cochranelibrary.com/cdsr/doi/10.1002/14651858.CD012658/media/CDSR/CD012658/CD012658.pdf										Yes	FALSE	FALSE	FALSE	FALSE	FALSE	FALSE	FALSE	FALSE	FALSE	FALSE	FALSE	FALSE
10.1002/14651858.CD012696			closed	Exercise for pregnant women with pre-existing diabetes for improving maternal and fetal outcomes	Brown, Julie; Ceysens, Gilles; Boulvain, Michel; West, Helen M	4	No	Cochrane Database of Systematic Reviews	2017	John Wiley & Sons, Ltd	FALSE	reference-entry		FALSE			No		0	FALSE	null					1											Yes	FALSE	FALSE	FALSE	FALSE	FALSE	FALSE	FALSE	FALSE	FALSE	FALSE	FALSE	FALSE
10.1002/14651858.CD012696.pub2	open (via free pdf)		bronze	Exercise for pregnant women with pre-existing diabetes for improving maternal and fetal outcomes	Brown, Julie; Ceysens, Gilles; Boulvain, Michel	3	No	Cochrane Database of Systematic Reviews	2017	Wiley-Blackwell	TRUE	journal-article		FALSE	publishedVersion	publisher	No		0	FALSE	1465-1858	12 months embargo	cannot	yellow		0	https://www.cochranelibrary.com/cdsr/doi/10.1002/14651858.CD012696.pub2/media/CDSR/CD012696/CD012696.pdf					USD	3000	3000	NIHR Cochrane Programme Grant Project [13/89/05]	General & Internal Medicine	Yes	FALSE	FALSE	FALSE	FALSE	FALSE	FALSE	FALSE	FALSE	TRUE	FALSE	FALSE	FALSE
10.1002/14651858.CD012846			closed	GnRH agonists for uterine fibroids	Hodgson, Ruth; Bhave Chittawar, Priya; Farquhar, Cindy	3	No	Cochrane Database of Systematic Reviews	2017	Wiley-Blackwell	FALSE	journal-article		FALSE			No		0	FALSE	1465-1858	12 months embargo	cannot	yellow		0						USD	3000	3000			No	FALSE	FALSE	FALSE	FALSE	FALSE	FALSE	FALSE	FALSE	FALSE	FALSE	FALSE	FALSE
10.1002/2016GL071491			closed	Observations of amplified roughness from crystal accretion in the sub-ice ocean boundary layer	Robinson, N. J.; Stevens, C. L.; Mcphee, M. G.	3	No	Geophysical Research Letters	2017	Wiley-Blackwell	FALSE	journal-article		FALSE			No		0	FALSE	0094-8276	can	6 months embargo	green		1						USD	2500	2500	Royal Society of New Zealand Marsden Fund; NIWA Core Funding Antarctica New Zealand; University of Otago Research Grant; Deep South National Science Challenge project 'Targeted observations; New Zealand Antarctic Research Institute; Metadata are lodged with Antarctica New Zealand	Geology	No	FALSE	FALSE	FALSE	TRUE	TRUE	FALSE	FALSE	TRUE	FALSE	FALSE	FALSE	FALSE
10.1002/2016JD025819			closed	September Arctic sea ice extent indicated by June reflected solar radiation	Zhan, Yizhe; Davies, Roger	2	No	Journal of Geophysical Research: Atmospheres	2017	Wiley-Blackwell	FALSE	journal-article		FALSE			No		0	FALSE	2169-897X	can	6 months embargo	green		2						USD	3500	3500	California Institute of Technology/Jet Propulsion Laboratory [1460339]; University of Auckland [1460339]; Chinese Scholarship Council	Meteorology & Atmospheric Sciences	Yes	FALSE	FALSE	FALSE	FALSE	FALSE	FALSE	FALSE	FALSE	FALSE	FALSE	FALSE	FALSE
10.1002/2016MS000697	open (via page says license)	cc-by-nc-nd	gold	Understanding the West African Monsoon from the analysis of diabatic heating distributions as simulated by climate models	Martin, G. M.; Peyrill\\U00E9, P.; Roehrig, R.; Rio, C.; Caian, M.; Bellon, G.; Codron, F.; Lafore, J.-P.; Poan, D. E.; Idelkadi, A.	10	No	Journal of Advances in Modeling Earth Systems	2017	Wiley-Blackwell	TRUE	journal-article		TRUE	publishedVersion	publisher	Yes	HAL DiVA.org	2	TRUE	1942-2466	can	6 months embargo	green		4	https://doi.org/10.1002/2016ms000697	Yes	USD	1500	50			1500	European Commission's 7th Framework Programme [282672]; EMBRACE project	Meteorology & Atmospheric Sciences	No	FALSE	FALSE	FALSE	FALSE	FALSE	FALSE	FALSE	FALSE	FALSE	FALSE	FALSE	FALSE
10.1002/2016MS000728	oa journal (via doaj)	cc-by-nc-nd	gold	Examining the West African Monsoon circulation response to atmospheric heating in a GCM dynamical core	Chadwick, R.; Martin, G.M.; Copsey, D.; Bellon, G.; Caian, M.; Codron, F.; Rio, C.; Roehrig, R.	8	No	Journal of Advances in Modeling Earth Systems	2017	Wiley-Blackwell	TRUE	journal-article		TRUE	publishedVersion	publisher	Yes	HAL DiVA.org	2	TRUE	1942-2466	can	6 months embargo	green		2	https://doi.org/10.1002/2016ms000728	Yes	USD	1500	50			1500	European Commission's 7th Framework Programme [282672]; EMBRACE	Meteorology & Atmospheric Sciences	No	FALSE	FALSE	FALSE	FALSE	FALSE	FALSE	FALSE	FALSE	FALSE	FALSE	FALSE	FALSE
10.1002/2016WR020096			closed	Nitrogen Subsidies in Glacial Meltwater: Implications for High Elevation Aquatic Chains	Warner, K. A.; Saros, J. E.; Simon, K. S.	3	No	Water Resources Research	2017	Wiley-Blackwell	FALSE	journal-article		FALSE			No		0	FALSE	0043-1397	can	6 months embargo	green		0						USD	3500	3500	Dan and Betty Churchill Exploration Fund; Gokcen Fund	Environmental Sciences & Ecology; Marine & Freshwater Biology; Water Resources	No	FALSE	FALSE	FALSE	FALSE	FALSE	FALSE	FALSE	FALSE	FALSE	FALSE	FALSE	FALSE
10.1002/2016WR020205			closed	Isolating roughness scales of gravel-bed patches	Bertin, Stephane; Groom, Jane; Friedrich, Heide	3	No	Water Resources Research	2017	Wiley-Blackwell	FALSE	journal-article		FALSE			No		0	FALSE	0043-1397	can	6 months embargo	green		9						USD	3500	3500	Marsden Fund [UOA1412]	Environmental Sciences & Ecology; Marine & Freshwater Biology; Water Resources	Yes	FALSE	FALSE	FALSE	TRUE	TRUE	FALSE	FALSE	TRUE	FALSE	FALSE	FALSE	FALSE
10.1002/2017EF000589	oa journal (via doaj)	cc-by-nc-nd	gold	Future reef growth can mitigate physical impacts of sea-level rise on atoll islands	Beetham, Edward; Kench, Paul S.; Popinet, St\\U00E9Phane	3	No	Earth's Future	2017	Wiley-Blackwell	TRUE	journal-article		TRUE	publishedVersion	publisher	Yes	HAL	1	TRUE	2328-4277	can	can	green	CC-BY-NC	8	https://doi.org/10.1002/2017ef000589	Yes	USD	1800	1800	USD	1800	1800	University of Auckland	Environmental Sciences & Ecology; Geology; Meteorology & Atmospheric Sciences	Yes	FALSE	FALSE	FALSE	FALSE	FALSE	FALSE	FALSE	FALSE	FALSE	FALSE	FALSE	FALSE
10.1002/2017GC007021			closed	Gas Hydrate Formation Amid Submarine Canyon Incision: Investigations From New Zealand's Hikurangi Subduction Margin	Crutchley, G. J.; Kroeger, K. F.; Pecher, I. A.; Mountjoy, J. J.; Gorman, A. R.	5	No	Geochemistry, Geophysics, Geosystems	2017	Wiley-Blackwell	FALSE	journal-article		FALSE			No		0	FALSE	1525-2027	can	6 months embargo	green		0						USD	3500	3500	New Zealand Ministry of Business Innovation and Employment: MBIE ['C05X0908']; GNS Science Strategic Science Investment Funding (SSIF)	Geochemistry & Geophysics	No	FALSE	FALSE	FALSE	FALSE	FALSE	TRUE	FALSE	TRUE	FALSE	FALSE	FALSE	FALSE
10.1002/2017GC007202	oa repository (via OAI-PMH title and first author match)		green	Petrophysical, Geochemical, and Hydrological Evidence for Extensive Fracture-Mediated Fluid and Heat Transport in the Alpine Fault's Hanging-Wall Damage Zone	Townend, John; Sutherland, Rupert; Toy, Virginia G.; Doan, Mai-Linh; C\\U00E9L\\U00E9Rier, Bernard; Massiot, C\\U00E9Cile; Coussens, Jamie; Jeppson, Tamara; Janku-Capova, Lucie; Remaud, L\\U00E9A; Upton, Phaedra; Schmitt, Douglas R.; Pezard, Philippe; Williams, Jack; Allen, Michael John; Baratin, Laura-May; Barth, Nicolas; Becroft, Leeza; Boese, Carolin M.; Boulton, Carolyn; Broderick, Neil	68	Yes	Geochemistry, Geophysics, Geosystems	2017	Wiley-Blackwell	TRUE	journal-article		FALSE	publishedVersion	repository	Yes	HAL eprints.soton.ac.uk	2	FALSE	1525-2027	can	6 months embargo	green		6	https://dspace.library.uu.nl/bitstream/1874/361096/1/townend.pdf					USD	3500	3500	International Continental Scientific Drilling Program (ICDP); Marsden Fund of the Royal Society of New Zealand grant [GNS1002]; GNS Science; Victoria University of Wellington; University of Otago grant [UOOX1413]; Ministry of Business Innovation and Employment; NERC [NE/J022128/1 NE/J024449/1]	Geochemistry & Geophysics	Yes	FALSE	FALSE	FALSE	TRUE	TRUE	TRUE	FALSE	TRUE	FALSE	FALSE	FALSE	FALSE
10.1002/2017GL073658	open (via page says license)	cc-by-nc-nd	hybrid	Internal variability in a coupled general circulation model in radiative-convective equilibrium	Coppin, David; Bony, Sandrine	2	No	Geophysical Research Letters	2017	Wiley-Blackwell	TRUE	journal-article		FALSE	publishedVersion	publisher	No		0	FALSE	0094-8276	can	6 months embargo	green		7	https://doi.org/10.1002/2017gl073658					USD	2500	2500	UPMC (Universite Pierre et Marie Curie); European Research Council (ERC) EUREC4A [694768]	Geology	Yes	FALSE	FALSE	FALSE	FALSE	FALSE	FALSE	FALSE	FALSE	FALSE	FALSE	FALSE	FALSE
10.1002/2017GL073878			closed	Physics-based forecasting of induced seismicity at Groningen gas field, the Netherlands	Dempsey, David; Suckale, Jenny	2	No	Geophysical Research Letters	2017	Wiley-Blackwell	FALSE	journal-article		FALSE			No		0	FALSE	0094-8276	can	6 months embargo	green		13						USD	2500	2500	Stanford Center for Induced and Triggered Seismicity	Geology	Yes	FALSE	FALSE	FALSE	FALSE	FALSE	FALSE	FALSE	FALSE	FALSE	FALSE	FALSE	FALSE
10.1002/2017GL075489			closed	Projected Response of Low-Level Convergence and Associated Precipitation to Greenhouse Warming	Weller, Evan; Jakob, Christian; Reeder, Michael J.	3	No	Geophysical Research Letters	2017	Wiley-Blackwell	FALSE	journal-article		FALSE			No		0	FALSE	0094-8276	can	6 months embargo	green		1						USD	2500	2500	Australian Research Council Centre of Excellence for Climate System Science [CE110001028]	Geology	No	FALSE	FALSE	FALSE	FALSE	FALSE	FALSE	FALSE	FALSE	FALSE	FALSE	FALSE	FALSE
10.1002/2017GL076368			closed	A fluid pulse on the Hikurangi subduction margin - evidence from a heat flux transect across the upper limit of gas hydrate stability	Pecher, I. A.; Villinger, H.; Kaul, N.; Crutchley, G. J.; Mountjoy, J. J.; Huhn, K.; Kukowski, N.; Henrys, S. A.; Rose, P. S.; Coffin, R. B.	10	No	Geophysical Research Letters	2017	Wiley-Blackwell	FALSE	journal-article		FALSE			No		0	FALSE	0094-8276	can	6 months embargo	green		2						USD	2500	2500	New Zealand Ministry for Business Innovation and Employment [C05X0908]; Government of New Zealand; U.S. Department of Energy [DE-FE0026163]; German Bundesministerium fur Bildung und Forschung under BMBF grant [03G0247A/B SO 247-SLAMZ]; R/V Tangaroa voyage by Land Information New Zealand's OS2020 program [TAN1114]	Geology	Yes	FALSE	FALSE	FALSE	FALSE	FALSE	TRUE	FALSE	TRUE	FALSE	FALSE	FALSE	FALSE
10.1002/2017JB014019			closed	Dissolution and secondary mineral precipitation in basalts due to reactions with carbonic acid	Kanakiya, Shreya; Adam, Ludmila; Esteban, Lionel; Rowe, Michael C.; Shane, Phil	5	No	Journal of Geophysical Research: Solid Earth	2017	Wiley-Blackwell	FALSE	journal-article		FALSE			No		0	FALSE	2169-9313	can	6 months embargo	green		7						USD	3500	3500		Geochemistry & Geophysics	Yes	FALSE	FALSE	FALSE	FALSE	FALSE	FALSE	FALSE	FALSE	FALSE	FALSE	FALSE	FALSE
10.1002/2017JC013011			closed	Variability of the Subtropical Mode Water in the Southwest Pacific	Fernandez, Denise; Sutton, Philip; Bowen, Melissa	3	No	Journal of Geophysical Research: Oceans	2017	Wiley-Blackwell	FALSE	journal-article		FALSE			No		0	FALSE	2169-9275	can	6 months embargo	green		0						USD	3500	3500			No	FALSE	FALSE	FALSE	FALSE	FALSE	FALSE	FALSE	FALSE	FALSE	FALSE	FALSE	FALSE
10.1002/2017JD026456			closed	Cloud heights measured by MISR from 2000 to 2015	Davies, Roger; Jovanovic, Veljko M.; Moroney, Catherine M.	3	No	Journal of Geophysical Research: Atmospheres	2017	Wiley-Blackwell	FALSE	journal-article		FALSE			No		0	FALSE	2169-897X	can	6 months embargo	green		4						USD	3500	3500	California Institute of Technology/Jet Propulsion Laboratory [1460339]; University of Auckland	Meteorology & Atmospheric Sciences	Yes	FALSE	FALSE	FALSE	FALSE	FALSE	FALSE	FALSE	FALSE	FALSE	FALSE	FALSE	FALSE
10.1002/2017JG004095			closed	Tree mortality decreases water availability and ecosystem resilience to drought in piÃ±on-juniper woodlands in the southwestern USA	Morillas, L.; Pangle, R. E.; Maurer, G. E.; Pockman, W. T.; Mcdowell, N.; Huang, C.-W.; Krofcheck, D. J.; Fox, A. M.; Sinsabaugh, R. L.; Rahn, T. A.; Litvak, M. E.	11	No	Journal of Geophysical Research: Biogeosciences	2017	Wiley-Blackwell	FALSE	journal-article		FALSE			No		0	FALSE	2169-8953	can	6 months embargo	green		0						USD	3500	3500	DOE Office of Science TES [SC DE-SC0008088]; NSF Ecosystems [NSF-DEB-1557176]; Pacific Northwest National Lab's LDRD program; Los Alamos National Lab; College of Arts and Sciences at the University of New Mexico	Environmental Sciences & Ecology; Geology	No	FALSE	FALSE	FALSE	FALSE	FALSE	FALSE	FALSE	FALSE	FALSE	FALSE	FALSE	FALSE
10.1002/2017MS001116	open (via page says license)	cc-by-nc-nd	gold	Mechanism of Fast Atmospheric Energetic Equilibration Following Radiative Forcing by CO2	Dinh, T.; Fueglistaler, S.	2	No	Journal of Advances in Modeling Earth Systems	2017	Wiley-Blackwell	TRUE	journal-article		TRUE	publishedVersion	publisher	No		0	TRUE	1942-2466	can	6 months embargo	green		1	https://doi.org/10.1002/2017ms001116	Yes	USD	1500	50			1500	DOE [SC0006841]; NSF [AGS-1417659]	Meteorology & Atmospheric Sciences	Yes	FALSE	FALSE	FALSE	FALSE	FALSE	FALSE	FALSE	FALSE	FALSE	FALSE	FALSE	FALSE
10.1002/9780470015902.a0021903.pub2			closed	Scale-Dependence in Ecological Systems	Hewitt, Judi E; Thrush, Simon F; Lundquist, Carolyn	3	No	eLS	2017	John Wiley & Sons, Ltd	FALSE	reference-entry		FALSE			No		0	FALSE	null					0											No	FALSE	FALSE	FALSE	FALSE	FALSE	FALSE	FALSE	FALSE	FALSE	FALSE	FALSE	FALSE
10.1002/acn3.488	open (via page says license)	cc-by-nc-nd	gold	PREP2: A biomarker-based algorithm for predicting upper limb function after stroke	Stinear, Cathy M.; Byblow, Winston D.; Ackerley, Suzanne J.; Smith, Marie-Claire; Borges, Victor M.; Barber, P. Alan	6	No	Annals of Clinical and Translational Neurology	2017	Wiley-Blackwell	TRUE	journal-article		TRUE	publishedVersion	publisher	Yes	pubmedcentral.nih.gov	1	TRUE	2328-9503	can	can	green	CC-BY-NC-ND	16	https://doi.org/10.1002/acn3.488	Yes	USD	3000		USD	3000	3000	Health Research Council of New Zealand [09/164 11/270 14/136]	Neurosciences & Neurology	Yes	FALSE	TRUE	FALSE	FALSE	FALSE	FALSE	FALSE	TRUE	FALSE	FALSE	FALSE	FALSE
10.1002/acr.23082	oa repository (via OAI-PMH doi match)		green	Ultrasound Features of the First Metatarsophalangeal Joint in Gout and Asymptomatic Hyperuricemia: Comparison With Normouricemic Individuals	Stewart, Sarah; Dalbeth, Nicola; Vandal, Alain C.; Allen, Bruce; Miranda, Rhian; Rome, Keith	6	No	Arthritis Care & Research	2017	Wiley-Blackwell	TRUE	journal-article		FALSE	publishedVersion	repository	Yes	openrepository.aut.ac.nz	1	FALSE	2151-464X	12 months embargo	cannot	yellow		17	https://openrepository.aut.ac.nz/bitstream/10292/10027/2/Stewart%20ACR%202016%20Ultrasound.pdf					USD	4400	4400	Arthritis New Zealand; Takeda; Crealta; Cymabay; AstraZeneca; Ardea	Rheumatology	Yes	TRUE	FALSE	FALSE	FALSE	FALSE	FALSE	FALSE	FALSE	FALSE	FALSE	FALSE	FALSE
10.1002/acr.23131	open (via free pdf)		bronze	Are Foot and Ankle Characteristics Associated With Falls in People With Rheumatoid Arthritis? A Prospective Study	Brenton\\U2010Rule, Angela; Dalbeth, Nicola; Menz, Hylton B.; Bassett, Sandra; Rome, Keith	5	No	Arthritis Care & Research	2017	Wiley-Blackwell	TRUE	journal-article		FALSE	publishedVersion	publisher	Yes	eprints.keele.ac.uk openrepository.aut.ac.nz	2	FALSE	2151-464X	12 months embargo	cannot	yellow		4	https://onlinelibrary.wiley.com/doi/pdf/10.1002/acr.23131					USD	4400	4400	Arthritis New Zealand; Health Research Council of New Zealand	Rheumatology	Yes	FALSE	TRUE	FALSE	FALSE	FALSE	FALSE	FALSE	TRUE	FALSE	FALSE	FALSE	FALSE
10.1002/acr.23147	open (via free pdf)		bronze	Illness Perceptions and Mortality in Patients With Gout: A Prospective Observational Study	Serlachius, Anna; Gamble, Greg; House, Meaghan; Vincent, Zoe L.; Knight, Julie; Horne, Anne; Taylor, William J.; Petrie, Keith J.; Dalbeth, Nicola	9	No	Arthritis Care & Research	2017	Wiley-Blackwell	TRUE	journal-article		FALSE	publishedVersion	publisher	No		0	FALSE	2151-464X	12 months embargo	cannot	yellow		1	https://onlinelibrary.wiley.com/doi/pdf/10.1002/acr.23147					USD	4400	4400	Arthritis New Zealand; University of Auckland Faculty Research Development Fund; Henry Cotton Charitable Trust; AbbVie; Pfizer; Roche; Ardea Biosciences/AstraZeneca; Crealta; Cymabay; Menarini; Takeda; Teijin	Rheumatology	Yes	FALSE	FALSE	FALSE	FALSE	FALSE	FALSE	FALSE	FALSE	FALSE	FALSE	FALSE	FALSE
10.1002/adfm.201606215			closed	â€œNakedâ€ Magnetically Recyclable Mesoporous Au-Î³-Fe2 O3 Nanocrystal Clusters: A Highly Integrated Catalyst System	Shang, Lu; Liang, Yunhui; Li, Mengzhu; Waterhouse, Geoffrey I. N.; Tang, Pei; Ma, Ding; Wu, Li-Zhu; Tung, Chen-Ho; Zhang, Tierui	9	No	Advanced Functional Materials	2017	Wiley-Blackwell	FALSE	journal-article		FALSE			No		0	FALSE	1616-301X	12 months embargo	cannot	yellow		41						USD	5000	5000	Ministry of Science and Technology of China [2014CB239402 2013CB834505]; National Key Projects for Fundamental Research and Development of China [2016YFB0600900]; Strategic Priority Research Program of the Chinese Academy of Sciences [XDB17030300]; National Natural Science Foundation of China [21401206 51322213 21301183 51572270 21401207]; Beijing Natural Science Foundation [2152033 2154058]; You…	Chemistry; Science & Technology - Other Topics; Materials Science; Physics	No	FALSE	FALSE	FALSE	FALSE	FALSE	FALSE	FALSE	FALSE	FALSE	FALSE	FALSE	FALSE
10.1002/adfm.201700881			closed	Enhanced Capacitive Energy Storage in Polyoxometalate-Doped Polypyrrole	Herrmann, Sven; Aydemir, Nihan; N\\U00E4Gele, Florian; Fantauzzi, Donato; Jacob, Timo; Travas-Sejdic, Jadranka; Streb, Carsten	7	No	Advanced Functional Materials	2017	Wiley-Blackwell	FALSE	journal-article		FALSE			No		0	FALSE	1616-301X	12 months embargo	cannot	yellow		17						USD	5000	5000	Ulm University; University of Auckland; Fonds der Chemischen Industrie (FCI)	Chemistry; Science & Technology - Other Topics; Materials Science; Physics	Yes	FALSE	FALSE	FALSE	FALSE	FALSE	FALSE	FALSE	FALSE	FALSE	FALSE	FALSE	FALSE
10.1002/adma.201605148			closed	Alkali-Assisted Synthesis of Nitrogen Deficient Graphitic Carbon Nitride with Tunable Band Structures for Efficient Visible-Light-Driven Hydrogen Evolution	Yu, Huijun; Shi, Run; Zhao, Yunxuan; Bian, Tong; Zhao, Yufei; Zhou, Chao; Waterhouse, Geoffrey I. N.; Wu, Li-Zhu; Tung, Chen-Ho; Zhang, Tierui	10	No	Advanced Materials	2017	Wiley-Blackwell	FALSE	journal-article		FALSE			No		0	FALSE	0935-9648	12 months embargo	cannot	yellow		277						USD	5000	5000	Ministry of Science and Technology of China [2014CB239402 2013CB834505]; National Key Projects for Fundamental Research and Development of [2016YFB0600900]; Strategic Priority Research Program of the Chinese Academy of Sciences [XDB17030300]; National Natural Science Foundation of China [21401206 51322213 21301183 51572270 21401207]; Beijing Natural Science Foundation [2152033 2154058]; National …	Chemistry; Science & Technology - Other Topics; Materials Science; Physics	No	FALSE	FALSE	FALSE	FALSE	FALSE	FALSE	FALSE	FALSE	FALSE	FALSE	FALSE	FALSE
10.1002/adma.201700803			closed	Self-Assembled Au/CdSe Nanocrystal Clusters for Plasmon-Mediated Photocatalytic Hydrogen Evolution	Shi, Run; Cao, Yinhu; Bao, Yanjun; Zhao, Yufei; Waterhouse, Geoffrey I. N.; Fang, Zheyu; Wu, Li-Zhu; Tung, Chen-Ho; Yin, Yadong; Zhang, Tierui	10	No	Advanced Materials	2017	Wiley-Blackwell	FALSE	journal-article		FALSE			No		0	FALSE	0935-9648	12 months embargo	cannot	yellow		98						USD	5000	5000	Ministry of Science and Technology of China [2014CB239402 2013CB834505 2015CB932403]; National Key Projects for Fundamental Research and Development of China [2016YFB0600900]; National Natural Science Foundation of China [U1662118 51572270 51322213 21401206 21401207 21301183]; Strategic Priority Research Program of the Chinese Academy of Sciences [XDB17030300]; Beijing Natural Science Foundation …	Chemistry; Science & Technology - Other Topics; Materials Science; Physics	No	FALSE	FALSE	FALSE	FALSE	FALSE	FALSE	FALSE	FALSE	FALSE	FALSE	FALSE	FALSE
10.1002/adma.201700880			closed	Flexible Zinc-Tin Oxide Thin Film Transistors Operating at 1 kV for Integrated Switching of Dielectric Elastomer Actuators Arrays	Marette, Alexis; Poulin, Alexandre; Besse, Nadine; Rosset, Samuel; Briand, Danick; Shea, Herbert	6	No	Advanced Materials	2017	Wiley-Blackwell	FALSE	journal-article		FALSE			No		0	FALSE	0935-9648	12 months embargo	cannot	yellow		18						USD	5000	5000	Swiss National Science Foundation [200020-153122 200020-165993]	Chemistry; Science & Technology - Other Topics; Materials Science; Physics	No	FALSE	FALSE	FALSE	FALSE	FALSE	FALSE	FALSE	FALSE	FALSE	FALSE	FALSE	FALSE
10.1002/adma.201701312	open (via crossref license, author manuscript)	publisher-specific, author manuscript: http://onlinelibrary.wiley.com/termsAndConditions#am	hybrid	Scalable Manufacturing of Solderable and Stretchable Physiologic Sensing Systems	Kim, Yun-Soung; Lu, Jesse; Shih, Benjamin; Gharibans, Armen; Zou, Zhanan; Matsuno, Kristen; Aguilera, Roman; Han, Yoonjae; Meek, Ann; Xiao, Jianliang; Tolley, Michael T.; Coleman, Todd P.	12	No	Advanced Materials	2017	Wiley-Blackwell	TRUE	journal-article		FALSE	acceptedVersion	publisher	No		0	FALSE	0935-9648	12 months embargo	cannot	yellow		11	https://doi.org/10.1002/adma.201701312					USD	5000	5000	National Science Foundation [IIS-1522125 ECCS-1542148]; National Institutes of Mental Health [1R01MH110514]; University of California San Francisco California Preterm Birth Initiative	Chemistry; Science & Technology - Other Topics; Materials Science; Physics	No	FALSE	FALSE	FALSE	FALSE	FALSE	FALSE	FALSE	FALSE	FALSE	FALSE	TRUE	TRUE
10.1002/adma.201703828			closed	Layered-Double-Hydroxide Nanosheets as Efficient Visible-Light-Driven Photocatalysts for Dinitrogen Fixation	Zhao, Yufei; Zhao, Yunxuan; Waterhouse, Geoffrey I. N.; Zheng, Lirong; Cao, Xingzong; Teng, Fei; Wu, Li-Zhu; Tung, Chen-Ho; O\'Hare, Dermot; Zhang, Tierui	10	No	Advanced Materials	2017	Wiley-Blackwell	FALSE	journal-article		FALSE			No		0	FALSE	0935-9648	12 months embargo	cannot	yellow		96						USD	5000	5000	National Key Projects for Fundamental Research and Development of China [2016YFB0600901 2017YFA0206904 2017YFA0206900]; Ministry of Science and Technology of China [2014CB239402 2013CB834505]; National Natural Science Foundation of China [51772305 51572270 U1662118 21401206 21401207]; Chinese Academy of Sciences [XDB17030300]; Young Elite Scientist Sponsorship Program by CAST (YESS); Youth Innova…	Chemistry; Science & Technology - Other Topics; Materials Science; Physics	No	FALSE	FALSE	FALSE	FALSE	FALSE	FALSE	FALSE	FALSE	FALSE	FALSE	FALSE	FALSE
10.1002/admt.201700102			closed	Flexible Active Skin: Large Reconfigurable Arrays of Individually Addressed Shape Memory Polymer Actuators	Besse, Nadine; Rosset, Samuel; Zarate, Juan Jose; Shea, Herbert	4	No	Advanced Materials Technologies	2017	Wiley-Blackwell	FALSE	journal-article		FALSE			No		0	FALSE	2365-709X	12 months embargo	cannot	yellow		12						USD	3500	3500	EU [611621]	Materials Science	No	FALSE	FALSE	FALSE	FALSE	FALSE	FALSE	FALSE	FALSE	FALSE	FALSE	FALSE	FALSE
10.1002/aenm.201700005			closed	Defect-Engineered Ultrathin Î´-MnO2 Nanosheet Arrays as Bifunctional Electrodes for Efficient Overall Water Splitting	Zhao, Yunxuan; Chang, Chao; Teng, Fei; Zhao, Yufei; Chen, Guangbo; Shi, Run; Waterhouse, Geoffrey I. N.; Huang, Weifeng; Zhang, Tierui	9	No	Advanced Energy Materials	2017	Wiley-Blackwell	FALSE	journal-article		FALSE			No		0	FALSE	1614-6832	12 months embargo	cannot	yellow		122						USD	5000	5000	National Science Foundation of China [21377060 51572270 U1662118 51322213 21401206 21301183 21401207]; Science and Technology Infrastructure Program of Jiangsu [BM201380277]; Six Talent Climax Foundation of Jiangsu [20100292]; 333 Outstanding Youth Scientist Foundation of Jiangsu [C2011015]; Key Project of Environmental Protection Program of Jiangsu [2013016]; Priority Academic Program Developmen…	Chemistry; Energy & Fuels; Materials Science; Physics	No	FALSE	FALSE	FALSE	FALSE	FALSE	FALSE	FALSE	FALSE	FALSE	FALSE	FALSE	FALSE
10.1002/aenm.201700467			closed	NiFe Layered Double Hydroxide Nanoparticles on Co,N-Codoped Carbon Nanoframes as Efficient Bifunctional Catalysts for Rechargeable Zinc-Air Batteries	Wang, Qing; Shang, Lu; Shi, Run; Zhang, Xin; Zhao, Yufei; Waterhouse, Geoffrey I. N.; Wu, Li-Zhu; Tung, Chen-Ho; Zhang, Tierui	9	No	Advanced Energy Materials	2017	Wiley-Blackwell	FALSE	journal-article		FALSE			No		0	FALSE	1614-6832	12 months embargo	cannot	yellow		78						USD	5000	5000	Ministry of Science and Technology of China [2014CB239402 2013CB834505]; National Key Projects for Fundamental Research and Development of China [2016YFB0600900]; National Natural Science Foundation of China [51572270 U1662118 51322213 21401206 21401207]; Chinese Academy of Sciences [XDB17030300]; Beijing Natural Science Foundation [2152033 2154058]; Youth Innovation Promotion Association; Nation…	Chemistry; Energy & Fuels; Materials Science; Physics	No	FALSE	FALSE	FALSE	FALSE	FALSE	FALSE	FALSE	FALSE	FALSE	FALSE	FALSE	FALSE
10.1002/aic.15657	open (via crossref license, author manuscript)	publisher-specific, author manuscript: http://onlinelibrary.wiley.com/termsAndConditions	hybrid	A continuum-approach modeling of surface composition and ternary component distribution inside low fat milk emulsions during single droplet drying	Putranto, Aditya; Foerster, Martin; Woo, Meng Wai; Selomulya, Cordelia; Chen, Xiao Dong	5	No	AIChE Journal	2017	Wiley-Blackwell	TRUE	journal-article		FALSE	acceptedVersion	publisher	Yes	pure.qub.ac.uk	1	FALSE	0001-1541	12 months embargo	cannot	yellow		4	https://doi.org/10.1002/aic.15657					USD	3750	3750	Australian Research Council (ARC); Dairy Management Inc. through the ARC Linkage program [LP140100922]	Engineering	No	FALSE	FALSE	FALSE	FALSE	FALSE	FALSE	FALSE	FALSE	FALSE	FALSE	FALSE	FALSE
10.1002/aic.15713			closed	Formation process of core-shell microparticles by solute migration during drying of homogenous composite droplets	Fu, Nan; Wu, Winston Duo; Wu, Zhangxiong; Moo, Fei Tzhung; Woo, Meng Wai; Selomulya, Cordelia; Chen, Xiao Dong	7	No	AIChE Journal	2017	Wiley-Blackwell	FALSE	journal-article		FALSE			No		0	FALSE	0001-1541	12 months embargo	cannot	yellow		4						USD	3750	3750	National Key Research and Development Program of China (International SandT Cooperation Program ISTCP) [2016YFE0101200]; Natural Science Foundation of China [21506135 31601513]; Natural Science Foundation of Jiangsu Province [BK20140309 BK20140317]; Priority Academic Program Development (PAPD) of Jiangsu Higher Education Institutions; Soochow University	Engineering	No	FALSE	FALSE	FALSE	FALSE	FALSE	FALSE	FALSE	FALSE	FALSE	FALSE	FALSE	FALSE
10.1002/ajhb.22991			closed	How much impact do gains in height have on shoulder breadths within Taiwanese families?	Floyd, Bruce	1	No	American Journal of Human Biology	2017	Wiley-Blackwell	FALSE	journal-article		FALSE			No		0	FALSE	1042-0533	12 months embargo	cannot	yellow		0						USD	3600	3600	UARC [3601710/9211 3602481/9211]	Anthropology; Life Sciences & Biomedicine - Other Topics	Yes	FALSE	FALSE	FALSE	FALSE	FALSE	FALSE	FALSE	FALSE	FALSE	FALSE	FALSE	FALSE
10.1002/ajmg.a.38123			closed	Revised estimates of the risk of fetal loss following a prenatal diagnosis of trisomy 13 or trisomy 18	Cavadino, Alana; Morris, Joan K.	2	No	American Journal of Medical Genetics Part A	2017	Wiley-Blackwell	FALSE	journal-article		FALSE			No		0	FALSE	1552-4825	12 months embargo	cannot	yellow		1						USD	3600	3600		Genetics & Heredity	No	FALSE	FALSE	FALSE	FALSE	FALSE	FALSE	FALSE	FALSE	FALSE	FALSE	FALSE	FALSE
10.1002/ajoc.201700169			closed	Synthesis of Enediamino Amino Acid Analogues and Peptides	Zhang, Shengping; Rodriguez, Luis M. De Leon; Harris, Paul W. R.; Brimble, Margaret A.	4	No	Asian Journal of Organic Chemistry	2017	Wiley-Blackwell	FALSE	journal-article		FALSE			No		0	FALSE	2193-5807	Upon funder agreement with publisher	cannot	white		5						USD	3000	3000	Maurice Wilkins Centre for Molecular Biodiscovery; China Scholarship Council	Chemistry	Yes	FALSE	FALSE	FALSE	FALSE	FALSE	FALSE	FALSE	FALSE	FALSE	FALSE	FALSE	FALSE
10.1002/ajpa.23226			closed	Dental wear and age grading at Roonka, South Australia	Littleton, Judith	1	No	American Journal of Physical Anthropology	2017	Wiley-Blackwell	FALSE	journal-article		FALSE			No		0	FALSE	0002-9483	12 months embargo	cannot	yellow		2						USD	4200	4200	Royal Society of New Zealand Marsden Fund [14-UOA-19]	Anthropology; Evolutionary Biology	Yes	FALSE	FALSE	FALSE	TRUE	TRUE	FALSE	FALSE	TRUE	FALSE	FALSE	FALSE	FALSE
10.1002/ajpa.23227			closed	The influence of variation in parental height dimorphism on same-sex parent-offspring height differences	Floyd, B.	1	No	American Journal of Physical Anthropology	2017	Wiley-Blackwell	FALSE	journal-article		FALSE			No		0	FALSE	0002-9483	12 months embargo	cannot	yellow		0						USD	4200	4200	UARC [3601710/9211 3602481/9211]	Anthropology; Evolutionary Biology	Yes	FALSE	FALSE	FALSE	FALSE	FALSE	FALSE	FALSE	FALSE	FALSE	FALSE	FALSE	FALSE
10.1002/alr.21849			closed	Changes in the bacterial microbiome of patients with chronic rhinosinusitis after endoscopic sinus surgery	Jain, Ravi; Hoggard, Michael; Biswas, Kristi; Zoing, Melissa; Jiang, Yannan; Douglas, Richard	6	No	International Forum of Allergy & Rhinology	2017	Wiley-Blackwell	FALSE	journal-article		FALSE			No		0	FALSE	2042-6976	12 months embargo	cannot	yellow		10						USD	3000	3000	Garnett Passe and Rodney Williams Foundation	Otorhinolaryngology	Yes	FALSE	FALSE	FALSE	FALSE	FALSE	FALSE	FALSE	FALSE	FALSE	FALSE	FALSE	FALSE
10.1002/alr.21879			closed	The impact of endoscopic sinus surgery on paranasal physiology in simulated sinus cavities	Jain, Ravi; Kumar, Haribalan; Tawhai, Merryn; Douglas, Richard	4	No	International Forum of Allergy & Rhinology	2017	Wiley-Blackwell	FALSE	journal-article		FALSE			No		0	FALSE	2042-6976	12 months embargo	cannot	yellow		3						USD	3000	3000		Otorhinolaryngology	Yes	FALSE	FALSE	FALSE	FALSE	FALSE	FALSE	FALSE	FALSE	FALSE	FALSE	FALSE	FALSE
10.1002/alr.21970			closed	The in vitro mucolytic effect of xylitol and dornase alfa on chronic rhinosinusitis mucus	Hardcastle, Tim; Jain, Ravi; Radcliff, Fiona; Waldvogel-Thurlow, Sharon; Zoing, Melissa; Biswas, Kristi; Douglas, Richard	7	No	International Forum of Allergy & Rhinology	2017	Wiley-Blackwell	FALSE	journal-article		FALSE			No		0	FALSE	2042-6976	12 months embargo	cannot	yellow		5						USD	3000	3000	Garnett Passe Rodney Williams Memorial Trust; Garnett Passe Rodney Williams Memorial Trust	Otorhinolaryngology	Yes	FALSE	FALSE	FALSE	FALSE	FALSE	FALSE	FALSE	FALSE	FALSE	FALSE	FALSE	FALSE
10.1002/ange.201612488			closed	â€œ114â€-Type Nitrides LnAl(Si4âˆ’x Al x )N7 O Î´ with Unusual [AlN6 ] Octahedral Coordination	Huang, Saifang; Huang, Zhaohui; Cao, Peng; Zujovic, Zoran; Price, Jason R.; Avdeev, Maxim; Que, Meidan; Suzuki, Furitsu; Kido, Tsuyoshi; Ouyang, Xin; Kaji, Hironori; Fang, Minghao; Liu, Yan-Gai; Gao, Wei; S\\U00F6Hnel, Tilo	15	No	Angewandte Chemie	2017	Wiley-Blackwell	FALSE	journal-article		FALSE			No		0	FALSE	0044-8249	12 months embargo	cannot	yellow		0						USD	4500	4500			No	FALSE	FALSE	FALSE	FALSE	FALSE	FALSE	FALSE	FALSE	FALSE	FALSE	FALSE	FALSE
10.1002/ange.201702125	open (via free pdf)		bronze	InnenrÃ¼cktitelbild: â€œ114â€-Type Nitrides LnAl(Si4âˆ’x Al x )N7 O Î´ with Unusual [AlN6 ] Octahedral Coordination (Angew. Chem. 14/2017)	Huang, Saifang; Huang, Zhaohui; Cao, Peng; Zujovic, Zoran; Price, Jason R.; Avdeev, Maxim; Que, Meidan; Suzuki, Furitsu; Kido, Tsuyoshi; Ouyang, Xin; Kaji, Hironori; Fang, Minghao; Liu, Yan-Gai; Gao, Wei; S\\U00F6Hnel, Tilo	15	No	Angewandte Chemie	2017	Wiley-Blackwell	TRUE	journal-article		FALSE	publishedVersion	publisher	No		0	FALSE	0044-8249	12 months embargo	cannot	yellow		0	https://onlinelibrary.wiley.com/doi/pdf/10.1002/ange.201702125					USD	4500	4500			No	FALSE	FALSE	FALSE	FALSE	FALSE	FALSE	FALSE	FALSE	FALSE	FALSE	FALSE	FALSE
10.1002/anie.201612488			closed	â€œ114â€-Type Nitrides LnAl(Si4âˆ’x Al x )N7 O Î´ with Unusual [AlN6 ] Octahedral Coordination	Huang, Saifang; Huang, Zhaohui; Cao, Peng; Zujovic, Zoran; Price, Jason R.; Avdeev, Maxim; Que, Meidan; Suzuki, Furitsu; Kido, Tsuyoshi; Ouyang, Xin; Kaji, Hironori; Fang, Minghao; Liu, Yan-Gai; Gao, Wei; S\\U00F6Hnel, Tilo	15	No	Angewandte Chemie International Edition	2017	Wiley-Blackwell	FALSE	journal-article		FALSE			No		0	FALSE	1433-7851	12 months embargo	cannot	yellow		0						USD	4500	4500	National Natural Science Foundation of China (NSFC) [51032007 51272241 51372232]; Fundamental Research Funds for the Central Universities [2011PY0173]; Research Fund for the Doctoral Program of Higher Education of China [20130022110006]; RSNZ Marsden Fast-Start Fund [UOA1623]; China Scholarship Council (CSC); Collaborative Research Program of Institute for Chemical Research Kyoto University [2160…	Chemistry	Yes	FALSE	FALSE	FALSE	TRUE	TRUE	FALSE	FALSE	TRUE	FALSE	FALSE	FALSE	FALSE
10.1002/anie.201702125	open (via free pdf)		bronze	Inside Back Cover: â€œ114â€-Type Nitrides LnAl(Si4âˆ’x Al x )N7 O Î´ with Unusual [AlN6 ] Octahedral Coordination (Angew. Chem. Int. Ed. 14/2017)	Huang, Saifang; Huang, Zhaohui; Cao, Peng; Zujovic, Zoran; Price, Jason R.; Avdeev, Maxim; Que, Meidan; Suzuki, Furitsu; Kido, Tsuyoshi; Ouyang, Xin; Kaji, Hironori; Fang, Minghao; Liu, Yan-Gai; Gao, Wei; S\\U00F6Hnel, Tilo	15	No	Angewandte Chemie International Edition	2017	Wiley-Blackwell	TRUE	journal-article		FALSE	publishedVersion	publisher	No		0	FALSE	1433-7851	12 months embargo	cannot	yellow		0	https://onlinelibrary.wiley.com/doi/pdf/10.1002/anie.201702125					USD	4500	4500			No	FALSE	FALSE	FALSE	FALSE	FALSE	FALSE	FALSE	FALSE	FALSE	FALSE	FALSE	FALSE
10.1002/anie.201702242			closed	An Organoruthenium Anticancer Agent Shows Unexpected Target Selectivity For Plectin	Meier, Samuel M.; Kreutz, Dominique; Winter, Lilli; Klose, Matthias H. M.; Cseh, Klaudia; Weiss, Tamara; Bileck, Andrea; Alte, Beatrix; Mader, Johanna C.; Jana, Samir; Chatterjee, Annesha; Bhattacharyya, Arindam; Hejl, Michaela; Jakupec, Michael A.; Heffeter, Petra; Berger, Walter; Hartinger, Christian G.; Keppler, Bernhard K.; Wiche, Gerhard; Gerner, Christopher	20	No	Angewandte Chemie International Edition	2017	Wiley-Blackwell	FALSE	journal-article		FALSE			No		0	FALSE	1433-7851	12 months embargo	cannot	yellow		27						USD	4500	4500	Austrian Science Research Fund (FWF) [I1413-B09]	Chemistry	No	FALSE	FALSE	FALSE	FALSE	FALSE	FALSE	FALSE	FALSE	FALSE	FALSE	FALSE	FALSE
10.1002/anie.201702727			closed	Unexpected Direct Synthesis of N -Vinyl Amides through Vinyl Azide-Enolate [3+2] Cycloaddition	Choi, Hans; Shirley, Harry J.; Hume, Paul A.; Brimble, Margaret A.; Furkert, Daniel P.	5	No	Angewandte Chemie International Edition	2017	Wiley-Blackwell	FALSE	journal-article		FALSE			No		0	FALSE	1433-7851	12 months embargo	cannot	yellow		13						USD	4500	4500	Royal Society of New Zealand [UOA1422]	Chemistry	Yes	FALSE	FALSE	FALSE	FALSE	TRUE	FALSE	FALSE	TRUE	FALSE	FALSE	FALSE	FALSE
10.1002/anie.201705575			closed	Total Synthesis of Ovafolininsâ€…A and B: Unique Polycyclic Benzoxepin Lignans through a Cascade Cyclization	Davidson, Samuel J.; Barker, David	2	No	Angewandte Chemie International Edition	2017	Wiley-Blackwell	FALSE	journal-article		FALSE			No		0	FALSE	1433-7851	12 months embargo	cannot	yellow		4						USD	4500	4500	University of Auckland	Chemistry	Yes	FALSE	FALSE	FALSE	FALSE	FALSE	FALSE	FALSE	FALSE	FALSE	FALSE	FALSE	FALSE
10.1002/app.44614			closed	Crystallization of itaconic anhydride grafted poly(lactic acid) during annealing	Ku Marsilla, K. I.; Verbeek, C. J. R.	2	No	Journal of Applied Polymer Science	2017	Wiley-Blackwell	FALSE	journal-article		FALSE			No		0	FALSE	0021-8995	12 months embargo	cannot	yellow		2						USD	3600	3600		Polymer Science	No	FALSE	FALSE	FALSE	FALSE	FALSE	FALSE	FALSE	FALSE	FALSE	FALSE	FALSE	FALSE
10.1002/app.45513			closed	Rheological behaviors exhibited by soy protein systems under dynamic aqueous environments	Garrity, Nancy K.; Grigsby, Warren J.; Jin, Jianyong; Edmonds, Neil R.	4	No	Journal of Applied Polymer Science	2017	Wiley-Blackwell	FALSE	journal-article		FALSE			No		0	FALSE	0021-8995	12 months embargo	cannot	yellow		1						USD	3600	3600	New Zealand Ministry of Business Innovation and Employment [C04X1206]	Polymer Science	No	FALSE	FALSE	FALSE	FALSE	FALSE	TRUE	FALSE	TRUE	FALSE	FALSE	FALSE	FALSE
10.1002/app.45561	oa repository (via OAI-PMH title and first author match)		green	Biopolymer foams from Novatein thermoplastic protein and poly(lactic acid)	Walallavita, Anuradha Sammanie; Verbeek, Casparus Johannes Reinhard; Lay, Mark Christopher	3	No	Journal of Applied Polymer Science	2017	Wiley-Blackwell	TRUE	journal-article		FALSE	submittedVersion	repository	Yes	researchcommons.waikato.ac.nz	1	FALSE	0021-8995	12 months embargo	cannot	yellow		0	https://researchcommons.waikato.ac.nz/bitstream/10289/12049/4/thesis.pdf					USD	3600	3600		Polymer Science	Yes	TRUE	FALSE	FALSE	FALSE	FALSE	FALSE	FALSE	FALSE	FALSE	FALSE	FALSE	FALSE
10.1002/aqc.2655	oa repository (via OAI-PMH title and first author match)		green	Novel tools for early detection of a global aquatic invasive, the zebra mussel Dreissena polymorpha	Ardura, Alba; Zaiko, Anastasija; Borrell, Yaisel J.; Samuiloviene, Aurelija; Garcia-Vazquez, Eva	5	No	Aquatic Conservation: Marine and Freshwater Ecosystems	2017	Wiley-Blackwell	TRUE	journal-article		FALSE	publishedVersion	repository	Yes	ria.asturias.es	1	FALSE	1052-7613	12 months embargo	cannot	yellow		6	https://ria.asturias.es/RIA/bitstream/123456789/7527/1/Archivo.pdf					USD	3700	3700	Spanish Grant MINECO [CGL-2013-42415-R]; BONUS project BaltCoast - EU [Art 185]; Research Council of Lithuania; Research Council of Lithuania project BALMAN [TAP-LLT-14-013]	Environmental Sciences & Ecology; Marine & Freshwater Biology; Water Resources	No	FALSE	FALSE	FALSE	FALSE	FALSE	FALSE	FALSE	FALSE	FALSE	FALSE	FALSE	FALSE
10.1002/ar.23608	open (via free pdf)		bronze	Microstructure Variations in the Soft-Hard Tissue Junction of the Human Anterior Cruciate Ligament	Zhao, Lei; Lee, Peter V.S.; Ackland, David C.; Broom, Neil D.; Thambyah, Ashvin	5	No	The Anatomical Record	2017	Wiley-Blackwell	TRUE	journal-article		FALSE	publishedVersion	publisher	No		0	FALSE	1932-8486	12 months embargo	cannot	yellow		1	https://onlinelibrary.wiley.com/doi/pdf/10.1002/ar.23608					USD	3000	3000		Anatomy & Morphology	Yes	FALSE	FALSE	FALSE	FALSE	FALSE	FALSE	FALSE	FALSE	FALSE	FALSE	FALSE	FALSE
10.1002/arco.5126			closed	A preliminary redating of the Holocene Roonka burials, south-eastern Australia	Littleton, Judith; Petchey, Fiona; Walshe, Keryn; Pate, F. Donald	4	No	Archaeology in Oceania	2017	Wiley-Blackwell	FALSE	journal-article		FALSE			No		0	FALSE	0728-4896	unknown	unknown	gray		1						USD	2500	2500	Royal Society of New Zealand Marsden Fund University of Auckland [14-UOA-19]; Faculty of Arts Research Fund University of Auckland	Anthropology; Archaeology; Paleontology	Yes	FALSE	FALSE	FALSE	TRUE	TRUE	FALSE	FALSE	TRUE	FALSE	FALSE	FALSE	FALSE
10.1002/art.39799	oa repository (via OAI-PMH doi match)		green	Review: Gout: A Roadmap to Approaches for Improving Global Outcomes	Dalbeth, Nicola; Choi, Hyon K.; Terkeltaub, Robert	3	No	Arthritis & Rheumatology	2017	Wiley-Blackwell	TRUE	journal-article		FALSE	acceptedVersion	repository	Yes	pubmedcentral.nih.gov	1	FALSE	2326-5191	12 months embargo	cannot	yellow		8	http://europepmc.org/articles/pmc5195886					USD	4500	4500	Health Research Council of New Zealand [9101-3708025]; NIH [R01-AR-065944]; VA Research Service; AstraZeneca; Fonterra; Takeda; Pfizer; CymaBay; Crealta; Ardea/AstraZeneca; Menarini; Sobi; Revive; Selecta; Aequus; ProteoThera; Horizon; Relburn	Rheumatology	No	FALSE	TRUE	FALSE	FALSE	FALSE	FALSE	FALSE	TRUE	FALSE	FALSE	FALSE	FALSE
10.1002/art.39959	open (via free pdf)		bronze	Performance of Ultrasound in the Diagnosis of Gout in a Multicenter Study: Comparison With Monosodium Urate Monohydrate Crystal Analysis as the Gold Standard	Ogdie, Alexis; Taylor, William J.; Neogi, Tuhina; Fransen, Jaap; Jansen, Tim L.; Schumacher, H. Ralph; Louthrenoo, Worawit; Vazquez-Mellado, Janitzia; Eliseev, Maxim; Mccarthy, Geraldine; Stamp, Lisa K.; Perez-Ruiz, Fernando; Sivera, Francisca; Ea, Hang-Korng; Gerritsen, Martijn; Cagnotto, Giovanni; Cavagna, Lorenzo; Lin, Chingtsai; Chou, Yin-Yi; Tausche, Anne-Kathrin; Lima Gomes Ochtrop, Manuella	29	Yes	Arthritis & Rheumatology	2017	Wiley-Blackwell	TRUE	journal-article		FALSE	publishedVersion	publisher	Yes	pubmedcentral.nih.gov	1	FALSE	2326-5191	12 months embargo	cannot	yellow		21	https://doi.org/10.1002/art.39959					USD	4500	4500	American College of Rheumatology (Classification Criteria grant); European League Against Rheumatism (Classification Criteria grant); Arthritis New Zealand; Association Rhumatisme et Travail; Asociacion de Reumatologos del Hospital de Cruces; NIH (National Institute of Arthritis and Musculoskeletal and Skin Diseases) [K23-AR-063764]; NIH [P60-AR-47785 R01-AR-062506]; Health Research Council of Ne…	Rheumatology	No	FALSE	TRUE	FALSE	FALSE	FALSE	FALSE	FALSE	TRUE	FALSE	FALSE	FALSE	FALSE
10.1002/art.40110	oa repository (via pmcid lookup)		green	Population-Specific Resequencing Associates the ATP-Binding Cassette Subfamily C Member 4 Gene With Gout in New Zealand MÄori and Pacific Men	Tanner, Callum; Boocock, James; Stahl, Eli A.; Dobbyn, Amanda; Mandal, Asim K.; Cadzow, Murray; Phipps-Green, Amanda J.; Topless, Ruth K.; Hindmarsh, Jennie Harr\\U00E9; Stamp, Lisa K.; Dalbeth, Nicola; Choi, Hyon K.; Mount, David B.; Merriman, Tony R.	14	No	Arthritis & Rheumatology	2017	Wiley-Blackwell	TRUE	journal-article		FALSE	acceptedVersion	repository	No	no_oai_data	1	FALSE	2326-5191	12 months embargo	cannot	yellow		10	https://www.ncbi.nlm.nih.gov/pmc/articles/PMC5984252					USD	4500	4500	NIH [R21-AR-065968-01 NIH-R01-AR-056291]; New Zealand Health Research Council program [08/075 11/1075 14/527]	Rheumatology	Yes	FALSE	TRUE	FALSE	FALSE	FALSE	FALSE	FALSE	TRUE	FALSE	FALSE	FALSE	FALSE
10.1002/art.40136	open (via free pdf)		bronze	Antiphospholipid syndrome and pregnancy: Pathogenesis to translation	Abrahams, Vikki M.; Chamley, Lawrence W.; Salmon, Jane E.	3	No	Arthritis & Rheumatology	2017	Wiley-Blackwell	TRUE	journal-article		FALSE	publishedVersion	publisher	No		0	FALSE	2326-5191	12 months embargo	cannot	yellow		17	https://doi.org/10.1002/art.40136					USD	4500	4500	NIH (National Institute of Arthritis and Musculoskeletal and Skin Diseases) [AR-49772 AR-068189]; American Heart Association [15GRNT24480140]; Lupus Research Institute; Health Research Council of New Zealand [15/209]; Auckland Medical Research Foundation [1113002]	Rheumatology	No	FALSE	TRUE	FALSE	FALSE	FALSE	FALSE	TRUE	TRUE	FALSE	FALSE	FALSE	FALSE
10.1002/art.40159	open (via page says license)	cc-by-nc-nd	hybrid	Lesinurad, a Selective Uric Acid Reabsorption Inhibitor, in Combination With Febuxostat in Patients With Tophaceous Gout: Findings of a Phase III Clinical Trial	Dalbeth, Nicola; Jones, Graeme; Terkeltaub, Robert; Khanna, Dinesh; Kopicko, Jeff; Bhakta, Nihar; Adler, Scott; Fung, Maple; Storgard, Chris; Baumgartner, Scott; Perez-Ruiz, Fernando	11	No	Arthritis & Rheumatology	2017	Wiley-Blackwell	TRUE	journal-article		FALSE	publishedVersion	publisher	Yes	pubmedcentral.nih.gov eprints.utas.edu.au	2	FALSE	2326-5191	12 months embargo	cannot	yellow		39	https://doi.org/10.1002/art.40159					USD	4500	4500	AstraZeneca	Rheumatology	Yes	FALSE	FALSE	FALSE	FALSE	FALSE	FALSE	FALSE	FALSE	FALSE	FALSE	FALSE	FALSE
10.1002/art.40233	open (via page says license)	cc-by-nc	hybrid	Effects of Febuxostat in Early Gout: A Randomized, Double-blind, Placebo-controlled Study	Dalbeth, Nicola; Saag, Kenneth G.; Palmer, William E.; Choi, Hyon K.; Hunt, Barbara; Macdonald, Patricia A.; Thienel, Ulrich; Gunawardhana, Lhanoo	8	No	Arthritis & Rheumatology	2017	Wiley-Blackwell	TRUE	journal-article		FALSE	publishedVersion	publisher	Yes	pubmedcentral.nih.gov dash.harvard.edu	2	FALSE	2326-5191	12 months embargo	cannot	yellow		15	https://doi.org/10.1002/art.40233					USD	4500	4500	Takeda Pharmaceutical International Inc.; Takeda; CymaBay; Ardea Biosciences; AstraZeneca; Horizon; Sobi; Ironwood/AstraZeneca; Takeda Pharmaceuticals	Rheumatology	Yes	FALSE	FALSE	FALSE	FALSE	FALSE	FALSE	FALSE	FALSE	FALSE	FALSE	FALSE	FALSE
10.1002/asia.201701422			closed	Crystal and NMR Structures of a Peptidomimetic Î²-turn which provides facile synthesis of 13-membered Cyclic Tetrapeptides	Cameron, Alan J.; Squire, Christopher J.; Edwards, Patrick J. B.; Harjes, Elena; Sarojini, Vijayalekshmi	5	No	Chemistry - An Asian Journal	2017	Wiley-Blackwell	FALSE	journal-article		FALSE			No		0	FALSE	1861-4728	12 months embargo	cannot	yellow		3						USD	3000	3000	University of Auckland; Freemasons New Zealand	Chemistry	Yes	FALSE	FALSE	FALSE	FALSE	FALSE	FALSE	FALSE	FALSE	FALSE	FALSE	FALSE	FALSE
10.1002/aur.1795			closed	The Social Communication Questionnaire for adults with intellectual disability: SCQ-AID	Derks, Olivia; Heinrich, Manuel; Brooks, Whitney; Sterkenburg, Paula; Mccarthy, Jane; Underwood, Lisa; Sappok, Tanja	7	No	Autism Research	2017	Wiley-Blackwell	FALSE	journal-article		FALSE			No		0	FALSE	1939-3792	12 months embargo	cannot	yellow		2						USD	4100	4100		Behavioral Sciences; Psychology	No	FALSE	FALSE	FALSE	FALSE	FALSE	FALSE	FALSE	FALSE	FALSE	FALSE	FALSE	FALSE
10.1002/berj.3293			closed	Quality Talk and dialogic teaching-an examination of a professional development programme on secondary teachersâ€™ facilitation of student talk	Davies, Maree; Kiemer, Katharina; Meissel, Kane	3	No	British Educational Research Journal	2017	Wiley-Blackwell	FALSE	journal-article		FALSE			No		0	FALSE	0141-1926	18 months embargo	cannot	yellow		1						USD	3000	3000		Education & Educational Research	Yes	FALSE	FALSE	FALSE	FALSE	FALSE	FALSE	FALSE	FALSE	FALSE	FALSE	FALSE	FALSE
10.1002/berj.3299			closed	Researching the interdisciplinary curriculum: The need for â€˜translation devicesâ€™	Pountney, Richard; Mcphail, Graham	2	No	British Educational Research Journal	2017	Wiley-Blackwell	FALSE	journal-article		FALSE			No		0	FALSE	0141-1926	18 months embargo	cannot	yellow		2						USD	3000	3000		Education & Educational Research	No	FALSE	FALSE	FALSE	FALSE	FALSE	FALSE	FALSE	FALSE	FALSE	FALSE	FALSE	FALSE
10.1002/berj.3301			closed	Knowledge and teaching	Rata, Elizabeth	1	No	British Educational Research Journal	2017	Wiley-Blackwell	FALSE	journal-article		FALSE			No		0	FALSE	0141-1926	18 months embargo	cannot	yellow		2						USD	3000	3000		Education & Educational Research	Yes	FALSE	FALSE	FALSE	FALSE	FALSE	FALSE	FALSE	FALSE	FALSE	FALSE	FALSE	FALSE
10.1002/bin.1489			closed	The differential outcomes effect in children with autism	Mccormack, Jessica; Arnold-Saritepe, Angela; Elliffe, Douglas	3	No	Behavioral Interventions	2017	Wiley-Blackwell	FALSE	journal-article		FALSE			No		0	FALSE	1072-0847	12 months embargo	cannot	yellow		1						USD	2500	2500		Psychology	Yes	FALSE	FALSE	FALSE	FALSE	FALSE	FALSE	FALSE	FALSE	FALSE	FALSE	FALSE	FALSE
10.1002/biot.201700480	open (via page says license)	cc-by	hybrid	An engineered glycerol dehydratase with improved activity for the conversion of meso -2,3-butanediol to butanone	Maddock, Danielle J.; Gerth, Monica L.; Patrick, Wayne M.	3	No	Biotechnology Journal	2017	Wiley-Blackwell	TRUE	journal-article		FALSE	publishedVersion	publisher	No		0	FALSE	1860-6768	12 months embargo	cannot	yellow		4	https://onlinelibrary.wiley.com/doi/pdf/10.1002/biot.201700480					USD	3500	3500	New Zealand Ministry of Business Innovation and Employment; University of Otago; Rutherford Discovery Fellowship	Biochemistry & Molecular Biology; Biotechnology & Applied Microbiology	Yes	FALSE	FALSE	TRUE	FALSE	TRUE	TRUE	FALSE	TRUE	FALSE	FALSE	FALSE	FALSE
10.1002/bit.26387			closed	A review on comparative mechanistic studies of antimicrobial peptides against archaea	Varnava, Kyriakos G.; Ronimus, Ron S.; Sarojini, Vijayalekshmi	3	No	Biotechnology and Bioengineering	2017	Wiley-Blackwell	FALSE	journal-article		FALSE			No		0	FALSE	0006-3592	12 months embargo	cannot	yellow		1						USD	4200	4200	University of Auckland	Biotechnology & Applied Microbiology	Yes	FALSE	FALSE	FALSE	FALSE	FALSE	FALSE	FALSE	FALSE	FALSE	FALSE	FALSE	FALSE
10.1002/bjs.10432	open (via free pdf)		bronze	Multicentre observational study of adherence to Sepsis Six guidelines in emergency general surgery	UK National Surgical Research Collaborative	1	No	British Journal of Surgery	2017	Wiley-Blackwell	TRUE	journal-article		FALSE	publishedVersion	publisher	Yes	eprints.ucl.ac.uk.OAI2 research-information.bris.ac.uk	2	FALSE	0007-1323	12 months embargo	cannot	yellow		6	https://onlinelibrary.wiley.com/doi/pdf/10.1002/bjs.10432					USD	3600	3600	Department of Health [PB-PG-0214-33065]	Surgery	No	FALSE	FALSE	FALSE	FALSE	FALSE	FALSE	FALSE	FALSE	FALSE	FALSE	FALSE	FALSE
10.1002/bjs.10487			closed	Systematic review of the role of biomarkers in diagnosing anastomotic leakage following colorectal surgery	Su\'A, B. U.; Mikaere, H. L.; Rahiri, J. L.; Bissett, I. B.; Hill, A. G.	5	No	British Journal of Surgery	2017	Wiley-Blackwell	FALSE	journal-article		FALSE			No		0	FALSE	0007-1323	12 months embargo	cannot	yellow		3						USD	3600	3600			Yes	FALSE	FALSE	FALSE	FALSE	FALSE	FALSE	FALSE	FALSE	FALSE	FALSE	FALSE	FALSE
10.1002/ca.22847			closed	A reassessment of cervical surface anatomy via CT scan in an adult population	Shen, Xin-Hua; Xue, Hua-Dan; Chen, Yu; Wang, Man; Mirjalili, S. Ali; Zhang, Zhu-Hua; Ma, Chao	7	No	Clinical Anatomy	2017	Wiley-Blackwell	FALSE	journal-article		FALSE			No		0	FALSE	0897-3806	12 months embargo	cannot	yellow		6						USD	3000	3000			No	FALSE	FALSE	FALSE	FALSE	FALSE	FALSE	FALSE	FALSE	FALSE	FALSE	FALSE	FALSE
10.1002/ca.22864			closed	Integrating ultrasound into modern medical curricula	Patel, Shilpan G.; Benninger, Brion; Mirjalili, S. Ali	3	No	Clinical Anatomy	2017	Wiley-Blackwell	FALSE	journal-article		FALSE			No		0	FALSE	0897-3806	12 months embargo	cannot	yellow		10						USD	3000	3000		Anatomy & Morphology	Yes	FALSE	FALSE	FALSE	FALSE	FALSE	FALSE	FALSE	FALSE	FALSE	FALSE	FALSE	FALSE
10.1002/ca.22913			closed	A reappraisal of pediatric thoracic surface anatomy	Fischer, Nicholas J; Morreau, Jonty; Sugunesegran, Ramanen; Taghavi, Kiarash; Mirjalili, S. Ali	5	No	Clinical Anatomy	2017	Wiley-Blackwell	FALSE	journal-article		FALSE			No		0	FALSE	0897-3806	12 months embargo	cannot	yellow		0						USD	3000	3000		Anatomy & Morphology	Yes	FALSE	FALSE	FALSE	FALSE	FALSE	FALSE	FALSE	FALSE	FALSE	FALSE	FALSE	FALSE
10.1002/ca.22941			closed	The length of the large intestine in children determined by CT scan	Mirjalili, S. Ali; Tarr, Gregory; Stringer, Mark D	3	No	Clinical Anatomy	2017	Wiley-Blackwell	FALSE	journal-article		FALSE			No		0	FALSE	0897-3806	12 months embargo	cannot	yellow		2						USD	3000	3000		Anatomy & Morphology	Yes	FALSE	FALSE	FALSE	FALSE	FALSE	FALSE	FALSE	FALSE	FALSE	FALSE	FALSE	FALSE
10.1002/ca.22959			closed	The collateral venous system in late pregnancy: A systematic review of the literature	Humphries, Aimee; Stone, Peter; Mirjalili, S. Ali	3	No	Clinical Anatomy	2017	Wiley-Blackwell	FALSE	journal-article		FALSE			No		0	FALSE	0897-3806	12 months embargo	cannot	yellow		1						USD	3000	3000		Anatomy & Morphology	Yes	FALSE	FALSE	FALSE	FALSE	FALSE	FALSE	FALSE	FALSE	FALSE	FALSE	FALSE	FALSE
10.1002/chem.201700263			closed	Anti-Inflammatory Oxicams as Multi-donor Ligand Systems: pH- and Solvent-Dependent Coordination Modes of Meloxicam and Piroxicam to Ru and Os	Aman, Farhana; Hanif, Muhammad; Kubanik, Mario; Ashraf, Adnan; S\\U00F6Hnel, Tilo; Jamieson, Stephen M. F.; Siddiqui, Waseeq Ahmad; Hartinger, Christian G.	8	No	Chemistry - A European Journal	2017	Wiley-Blackwell	FALSE	journal-article		FALSE			No		0	FALSE	0947-6539	12 months embargo	cannot	yellow		17						USD	3800	3800	University of Auckland; Higher Education Commission of Pakistan [NRPU 20-1582]; IRSIP; Genesis Oncology Trust [GOT-1263-RPG]; Austrian Science Fund; COST [CM1105]	Chemistry	Yes	FALSE	FALSE	FALSE	FALSE	FALSE	FALSE	FALSE	FALSE	FALSE	FALSE	FALSE	FALSE
10.1002/cmdc.201700576			closed	Synthesis and Evaluation of In Vitro Biological Properties of Ferrocenyl Side-Chain-Decorated Paclitaxel	Pla\\U017Cuk, Damian; Wieczorek, Anna; Ciszewski, Wojciech M.; Kowalczyk, Karolina; B\\U0142Au\\U017C, Andrzej; Pawl\\U0119Dzio, Sylwia; Makal, Anna; Eurtivong, Chatchakorn; Arabshahi, Homayon J.; Reynisson, J\\U00F3Hannes; Hartinger, Christian G.; Rychlik, B\\U0142A\\U017Cej	12	No	ChemMedChem	2017	Wiley-Blackwell	FALSE	journal-article		FALSE			No		0	FALSE	1860-7179	12 months embargo	cannot	yellow		2						USD	3000	3000	National Science Centre Poland (NCN) [DEC-2012/05/B/ST5/00300]; NCN [DEC-2012/04/A/ST5/00609]	Pharmacology & Pharmacy	No	FALSE	FALSE	FALSE	FALSE	FALSE	FALSE	FALSE	FALSE	FALSE	FALSE	FALSE	FALSE
10.1002/cncr.30965	open (via free pdf)		bronze	Diagnosis and management of primary central nervous system lymphoma	Han, Catherine H.; Batchelor, Tracy T.	2	No	Cancer	2017	Wiley-Blackwell	TRUE	journal-article		FALSE	publishedVersion	publisher	No		0	FALSE	0008-543X	12 months embargo	cannot	yellow		10	https://onlinelibrary.wiley.com/doi/pdf/10.1002/cncr.30965					USD	3500	3500	National Cancer Institute [K24CA125440 R13CA124293]	Oncology	No	FALSE	FALSE	FALSE	FALSE	FALSE	FALSE	FALSE	FALSE	FALSE	FALSE	FALSE	FALSE
10.1002/cnm.2790			closed	A finite element model to investigate the effect of ulnar variance on distal radioulnar joint mechanics	Greybe, Desney; Boland, Michael R.; Wu, Tim; Mithraratne, Kumar	4	No	International Journal for Numerical Methods in Biomedical Engineering	2017	Wiley-Blackwell	FALSE	journal-article		FALSE			No		0	FALSE	2040-7939	12 months embargo	cannot	yellow		0						USD	3800	3800	University of Auckland Doctoral Scholarship	Engineering; Mathematical & Computational Biology; Mathematics	Yes	FALSE	FALSE	FALSE	FALSE	FALSE	FALSE	FALSE	FALSE	FALSE	FALSE	FALSE	FALSE
10.1002/cplu.201700050			closed	Functionalization of Ruthenium(II)(Î·6 -p -cymene)(3-hydroxy-2-pyridone) Complexes with (Thio)Morpholine: Synthesis and Bioanalytical Studies	Hanif, Muhammad; Meier, Samuel M.; Adhireksan, Zenita; Henke, Helena; Martic, Sanela; Movassaghi, Sanam; Labib, Mahmoud; Kandioller, Wolfgang; Jamieson, Stephen M. F.; Hejl, Michaela; Jakupec, Michael A.; Kraatz, Heinz-Bernhard; Davey, Curt A.; Keppler, Bernhard K.; Hartinger, Christian G.	15	No	ChemPlusChem	2017	Wiley-Blackwell	FALSE	journal-article		FALSE			No		0	FALSE	2192-6506	12 months embargo	cannot	yellow		5						USD	3000	3000	Genesis Oncology Trust [GOT-1263-RPG]; Austrian Science Fund [J3288-N28]; COST [CM1105]; Singapore Ministry of Education Academic Research Fund Tier 2 Program [19/08]; Ministry of Health National Medical Research Council [NMRC/1312/2011]; Ministry of Education Academic Research Fund Tier 3 Program [MOE2012-T3-1-001]	Chemistry	Yes	FALSE	FALSE	FALSE	FALSE	FALSE	FALSE	FALSE	FALSE	FALSE	FALSE	FALSE	FALSE
10.1002/cplu.201700176			closed	Back Cover: Functionalization of Ruthenium(II)(Î·6 -p -cymene)(3-hydroxy-2-pyridone) Complexes with (Thio)Morpholine: Synthesis and Bioanalytical Studies (ChemPlusChem 6/2017)	Hanif, Muhammad; Meier, Samuel M.; Adhireksan, Zenita; Henke, Helena; Martic, Sanela; Movassaghi, Sanam; Labib, Mahmoud; Kandioller, Wolfgang; Jamieson, Stephen M. F.; Hejl, Michaela; Jakupec, Michael A.; Kraatz, Heinz-Bernhard; Davey, Curt A.; Keppler, Bernhard K.; Hartinger, Christian G.	15	No	ChemPlusChem	2017	Wiley-Blackwell	FALSE	journal-article		FALSE			No		0	FALSE	2192-6506	12 months embargo	cannot	yellow		0						USD	3000	3000			No	FALSE	FALSE	FALSE	FALSE	FALSE	FALSE	FALSE	FALSE	FALSE	FALSE	FALSE	FALSE
10.1002/cssc.201700943	open (via free pdf)		bronze	Effect of Nitrogen Doping Level on the Performance of N-Doped Carbon Quantum Dot/TiO2 Composites for Photocatalytic Hydrogen Evolution	Shi, Run; Li, Zi; Yu, Huijun; Shang, Lu; Zhou, Chao; Waterhouse, Geoffrey I. N.; Wu, Li-Zhu; Zhang, Tierui	8	No	ChemSusChem	2017	Wiley-Blackwell	TRUE	journal-article		FALSE	publishedVersion	publisher	No		0	FALSE	1864-5631	12 months embargo	cannot	yellow		32	https://onlinelibrary.wiley.com/doi/pdf/10.1002/cssc.201700943					USD	3000	3000	Ministry of Science and Technology of China [2014CB239402 2013CB834505]; National Key Projects for Fundamental Research and Development of China [2016YFB0600900 2017YFA0206904 2017YFA0206900]; National Natural Science Foundation of China [U1662118 51572270 21401207]; Strategic Priority Research Program of the Chinese Academy of Sciences [XDB17030300]; Beijing Natural Science Foundation [2152033];…	Chemistry; Science & Technology - Other Topics	No	FALSE	FALSE	FALSE	FALSE	FALSE	FALSE	FALSE	FALSE	FALSE	FALSE	FALSE	FALSE
10.1002/dmrr.2918			closed	Ectopic fat accumulation in the pancreas and its biomarkers: A systematic review and meta-analysis	Singh, Ruma G.; Yoon, Harry D.; Poppitt, Sally D.; Plank, Lindsay D.; Petrov, Maxim S.	5	No	Diabetes/Metabolism Research and Reviews	2017	Wiley-Blackwell	FALSE	journal-article		FALSE			No		0	FALSE	1520-7552	12 months embargo	cannot	yellow		13						USD	3300	3300	Health Research Council of New Zealand [15/035]	Endocrinology & Metabolism	Yes	FALSE	TRUE	FALSE	FALSE	FALSE	FALSE	FALSE	TRUE	FALSE	FALSE	FALSE	FALSE
10.1002/eap.1553	open (via crossref license, author manuscript)	publisher-specific, author manuscript: http://onlinelibrary.wiley.com/termsAndConditions	hybrid	Model-based approaches to deal with detectability: a comment on Hutto (2016a)	Marques, Tiago A.; Thomas, Len; K\\U00E9Ry, Marc; Buckland, Stephen T.; Borchers, David L.; Rexstad, Eric; Fewster, Rachel M.; Mackenzie, Darryl I.; Royle, J. Andrew; Guillera-Arroita, Gurutzeta; Handel, Colleen M.; Pavlacky, David C.; Camp, Richard J.	13	No	Ecological Applications	2017	Wiley-Blackwell	TRUE	journal-article		FALSE	acceptedVersion	publisher	No		0	FALSE	1051-0761	can	can	green		3	https://doi.org/10.1002/eap.1553					USD	3000	3000			No	FALSE	FALSE	FALSE	FALSE	FALSE	FALSE	FALSE	FALSE	FALSE	FALSE	FALSE	FALSE
10.1002/ece3.3083	open (via page says license)	cc-by	gold	Alternative reproductive strategies and the maintenance of female color polymorphism in damselflies	S\\U00E1Nchez-Guill\\U00E9N, Rosa A.; Wellenreuther, Maren; Ch\\U00E1Vez-R\\U00Edos, Jes\\U00Fas R.; Beatty, Christopher D.; Rivas-Torres, Anais; Velasquez-Velez, Mar\\U00Eda; Cordero-Rivera, Adolfo	7	No	Ecology and Evolution	2017	Wiley-Blackwell	TRUE	journal-article		TRUE	publishedVersion	publisher	Yes	pubmedcentral.nih.gov	1	TRUE	2045-7758	can	can	green	CC-BY	4	https://doi.org/10.1002/ece3.3083	Yes	USD	1950	1850	USD	1950	1950	Ministerio de Ciencia e Innovacion [CGL2005-00122 CGL2008-02799 CGL2011-22629 CGL2014-53140-P]; Carl Tryggers Stiftelse for Vetenskaplig Forskning; CanMove	Environmental Sciences & Ecology; Evolutionary Biology	No	FALSE	FALSE	FALSE	FALSE	FALSE	FALSE	FALSE	FALSE	FALSE	FALSE	FALSE	FALSE
10.1002/eco.1828			closed	The impact of drought on sap flow of cooccurring Liquidambar formosana Hance and Quercus variabilis Blume in a temperate forest, Central China	Zhu, Liwei; Hu, Yanting; Zhao, Xiuhua; Zeng, Xiaomin; Zhao, Ping; Zhang, Zhenzhen; Ju, Yuxi	7	No	Ecohydrology	2017	Wiley-Blackwell	FALSE	journal-article		FALSE			No		0	FALSE	1936-0584	12 months embargo	cannot	yellow		3						USD	3600	3600	National Natural Science Foundation of China [31300335 41630752 41030638 31670410]	Environmental Sciences & Ecology; Water Resources	No	FALSE	FALSE	FALSE	FALSE	FALSE	FALSE	FALSE	FALSE	FALSE	FALSE	FALSE	FALSE
10.1002/eco.1829			closed	Difference in response of water use to evaporative demand for codominant diffuse-porous versus ring-porous tree species under N addition in a temperate forest	Ouyang, Lei; Zhao, Ping; Zhu, Liwei; Zhang, Zhenzhen; Zhao, Xiuhua; Ni, Guangyan	6	No	Ecohydrology	2017	Wiley-Blackwell	FALSE	journal-article		FALSE			No		0	FALSE	1936-0584	12 months embargo	cannot	yellow		1						USD	3600	3600	National Natural Science Foundation of China [41630752 31300335 41030638 31670410]; CAS/SAFEA International Partnership Program for Creative Research Teams	Environmental Sciences & Ecology; Water Resources	No	FALSE	FALSE	FALSE	FALSE	FALSE	FALSE	FALSE	FALSE	FALSE	FALSE	FALSE	FALSE
10.1002/ecy.2009	oa repository (via OAI-PMH title and first author match)		green	Drivers of nitrogen transfer in stream food webs across continents	Norman, Beth C.; Whiles, Matt R.; Collins, Sarah M.; Flecker, Alexander S.; Hamilton, Steve K.; Johnson, Sherri L.; Rosi, Emma J.; Ashkenas, Linda R.; Bowden, William B.; Crenshaw, Chelsea L.; Crowl, Todd; Dodds, Walter K.; Hall, Robert O.; El-Sabaawi, Rana; Griffiths, Natalie A.; Marti, Eug\\U00E8Nia; Mcdowell, William H.; Peterson, Scot D.; Rantala, Heidi M.; Riis, Tenna; Simon, Kevin S.	25	Yes	Ecology	2017	Wiley-Blackwell	TRUE	journal-article		FALSE	publishedVersion	repository	Yes	digitalcommons.unl.edu digital.csic.es	2	FALSE	0012-9658	can	can	green		3	http://digitalcommons.unl.edu/cgi/viewcontent.cgi?article=1669&context=natrespapers					USD	3000	3000	National Science Foundation [NSF-DEB 1052399 DBI-1401954]; Department of Energy's Office of Science Biological and Environmental Research; U.S. DOE [DE-AC05-00OR22725]; U.S. Department of Energy [DE-AC05-00OR22725]	Environmental Sciences & Ecology	No	FALSE	FALSE	FALSE	FALSE	FALSE	FALSE	FALSE	FALSE	FALSE	FALSE	TRUE	TRUE
10.1002/ejhf.641	oa repository (via OAI-PMH title and first author match)	cc-by-nc	green	Carotid body resection for sympathetic modulation in systolic heart failure: results from first-in-man study	Niewinski, Piotr; Janczak, Dariusz; Rucinski, Artur; Tubek, Stanislaw; Engelman, Zoar J.; Piesiak, Pawel; Jazwiec, Przemyslaw; Banasiak, Waldemar; Fudim, Marat; Sobotka, Paul A.; Javaheri, Shahrokh; Hart, Emma C.J.; Paton, Julian F.R.; Ponikowski, Piotr	14	No	European Journal of Heart Failure	2017	Wiley-Blackwell	TRUE	journal-article		FALSE	submittedVersion	repository	Yes	research-information.bris.ac.uk	1	FALSE	1388-9842	12 months embargo	cannot	yellow		30	https://research-information.bristol.ac.uk/files/80894025/Carotid_body_resection_for_sympathetic_modulation_EJHF_accepted.pdf					USD	4200	4200	CIBIEM Inc. CA USA	Cardiovascular System & Cardiology	No	FALSE	FALSE	FALSE	FALSE	FALSE	FALSE	FALSE	FALSE	FALSE	FALSE	FALSE	FALSE
10.1002/ejic.201601163	open (via free pdf)		bronze	Cationic Ru(Î·6-p-cymene) Complexes of 3-Hydroxy-4-pyr(id)ones - Lipophilic Triphenylphosphine as Co-Ligand Is Key to Highly Stable and Cytotoxic Anticancer Agents	Parveen, Shahida; Hanif, Muhammad; Movassaghi, Sanam; Sullivan, Matthew P.; Kubanik, Mario; Shaheen, Muhammad Ashraf; S\\U00F6Hnel, Tilo; Jamieson, Stephen M. F.; Hartinger, Christian G.	9	No	European Journal of Inorganic Chemistry	2017	Wiley-Blackwell	TRUE	journal-article		FALSE	publishedVersion	publisher	No		0	FALSE	1434-1948	12 months embargo	cannot	yellow		11	https://onlinelibrary.wiley.com/doi/pdf/10.1002/ejic.201601163					USD	3000	3000	University of Auckland; Austrian Science Fund (Schrodinger fellowship); Frederick Douglas Brown Postgraduate Science Research Scholarship; Higher Education Commission of Pakistan [2013-85/RD/09]; India-New Zealand Education Council; Education New Zealand; India-New Zealand Research Institute; Royal Society of New Zealand; European Cooperation in Science and Technology (COST) [CM1105]	Chemistry	Yes	FALSE	FALSE	FALSE	FALSE	TRUE	FALSE	FALSE	TRUE	FALSE	FALSE	FALSE	FALSE
10.1002/ejic.201700155			closed	Electrospray-Ionisation Mass-Spectrometric (ESI-MS) Investigation of Beryllium Hydrolysis in Acidic Solutions of Beryllium Sulfate	Raymond, Onyekachi; Henderson, William; Brothers, Penelope J.; Plieger, Paul G.	4	No	European Journal of Inorganic Chemistry	2017	Wiley-Blackwell	FALSE	journal-article		FALSE			No		0	FALSE	1434-1948	12 months embargo	cannot	yellow		1						USD	3000	3000	Marsden Fund of the New Zealand Government [MAU1204]	Chemistry	Yes	FALSE	FALSE	FALSE	TRUE	TRUE	FALSE	FALSE	TRUE	FALSE	FALSE	FALSE	FALSE
10.1002/ejsp.2252			closed	Generalized and specific components of prejudice: The decomposition of intergroup context effects	Meeusen, Cecil; Barlow, Fiona Kate; Sibley, Chris G.	3	No	European Journal of Social Psychology	2017	Wiley-Blackwell	FALSE	journal-article		FALSE			No		0	FALSE	0046-2772	12 months embargo	cannot	yellow		4						USD	2500	2500	Research Foundation Flanders (FWO Belgium); Templeton World Charity Foundation [0077]	Psychology	No	FALSE	FALSE	FALSE	FALSE	FALSE	FALSE	FALSE	FALSE	FALSE	FALSE	FALSE	FALSE
10.1002/elan.201600753			closed	Electrochemical Determination of the Antioxidant Activity inEchinacea PurpureaRoots Using Square Wave Voltammetry	Newair, Emad F.; Abdel-Hamid, Refat; Kilmartin, Paul A.	3	No	Electroanalysis	2017	Wiley-Blackwell	FALSE	journal-article		FALSE			No		0	FALSE	1040-0397	12 months embargo	cannot	yellow		0						USD	3000	3000	Science and Technology Development Fund (STDF) Egypt [5361]	Chemistry; Electrochemistry	No	FALSE	FALSE	FALSE	FALSE	FALSE	FALSE	FALSE	FALSE	FALSE	FALSE	FALSE	FALSE
10.1002/epi4.12033	open (via page says license)	cc-by-nc-nd	gold	EpiNet as a way of involving more physicians and patients in epilepsy research: Validation study and accreditation process	Bergin, Peter S.; Beghi, Ettore; Sadleir, Lynette G.; Brockington, Alice; Tripathi, Manjari; Richardson, Mark P.; Bianchi, Elisa; Srivastava, Kavita; Jayabal, Jayaganth; Legros, Benjamin; Ossemann, Michel; Mcgrath, Nicole; Verrotti, Alberto; Tan, Hui Jan; Beretta, Simone; Frith, Richard; Iniesta, Ivan; Whitham, Emma; Wanigasinghe, Jithangi; Ezeala-Adikaibe, Birinus; Striano, Pasquale	27	Yes	Epilepsia Open	2017	Wiley-Blackwell	TRUE	journal-article		TRUE	publishedVersion	publisher	Yes	pubmedcentral.nih.gov eprints.ucl.ac.uk.OAI2 pure.atira.dk	3	TRUE	2470-9239	12 months embargo	cannot	yellow		2	https://doi.org/10.1002/epi4.12033	Yes	USD	2400		USD	2400	2400			No	FALSE	FALSE	FALSE	FALSE	FALSE	FALSE	FALSE	FALSE	FALSE	FALSE	FALSE	FALSE
10.1002/eqe.2885			closed	Experimental assessment of contact forces on a rigid base following footing uplift	Chen, Yuanzhi; Larkin, Tam; Chouw, Nawawi	3	No	Earthquake Engineering & Structural Dynamics	2017	Wiley-Blackwell	FALSE	journal-article		FALSE			No		0	FALSE	0098-8847	12 months embargo	cannot	yellow		7						USD	3800	3800	Ministry of Business Innovation and Employment through the New Zealand Natural Hazard Research Platform [3703249]	Engineering	Yes	FALSE	FALSE	FALSE	FALSE	FALSE	TRUE	FALSE	TRUE	FALSE	FALSE	FALSE	FALSE
10.1002/eqe.2894			closed	Aftershock collapse fragility curves for non-ductile RC buildings: a scenario-based assessment	Gaetani D\'Aragona, Marco; Polese, Maria; Elwood, Kenneth J.; Baradaran Shoraka, Majid; Prota, Andrea	5	No	Earthquake Engineering & Structural Dynamics	2017	Wiley-Blackwell	FALSE	journal-article		FALSE			No		0	FALSE	0098-8847	12 months embargo	cannot	yellow		5						USD	3800	3800	[PON03PE_00093_4]	Engineering	No	FALSE	FALSE	FALSE	FALSE	FALSE	FALSE	FALSE	FALSE	FALSE	FALSE	FALSE	FALSE
10.1002/er.3760			closed	Screening alternatives for producing paraffinic phase change materials for thermal energy storage in buildings	Kurdi, Jamal; Al-Muhtaseb, Shaheen; Madadkhahsalmassi, Bahareh; Farid, Mohammed	4	No	International Journal of Energy Research	2017	Wiley-Blackwell	FALSE	journal-article		FALSE			No		0	FALSE	0363-907X	12 months embargo	cannot	yellow		3						USD	2500	2500	NPRP award from Qatar National Research Fund (Qatar Foundation) [NPRP 5-093-2-034]	Energy & Fuels; Nuclear Science & Technology	No	FALSE	FALSE	FALSE	FALSE	FALSE	FALSE	FALSE	FALSE	FALSE	FALSE	FALSE	FALSE
10.1002/esp.4176			closed	New insights on the relative contributions of coastal processes and tectonics to shore platform development following the KaikÅura earthquake	Stephenson, Wayne J.; Dickson, Mark E.; Denys, Paul H.	3	No	Earth Surface Processes and Landforms	2017	Wiley-Blackwell	FALSE	journal-article		FALSE			No		0	FALSE	0197-9337	12 months embargo	cannot	yellow		0						USD	4200	4200	Otago University Division of Humanities Research Grant Support Scheme	Physical Geography; Geology	Yes	FALSE	FALSE	FALSE	FALSE	FALSE	FALSE	FALSE	FALSE	FALSE	FALSE	FALSE	FALSE
10.1002/etep.2374			closed	Distributor â€œtime valueâ€ pricing framework to schedule distributed energy resources	Zhang, Zhongwei Jake; Nair, Nirmal-Kumar	2	No	International Transactions on Electrical Energy Systems	2017	Wiley-Blackwell	FALSE	journal-article		FALSE			No		0	FALSE	2050-7038	12 months embargo	cannot	yellow		0						USD	2500	2500		Engineering	Yes	FALSE	FALSE	FALSE	FALSE	FALSE	FALSE	FALSE	FALSE	FALSE	FALSE	FALSE	FALSE
10.1002/fam.2376			closed	Evaluation of fire performance of organic fire retardant free acrylic based coatings applied on various building materials by cone calorimetric method	De Silva, Karnika; Ray, Sudip; Blache, Robert; Taylor, Mark	4	No	Fire and Materials	2017	Wiley-Blackwell	FALSE	journal-article		FALSE			No		0	FALSE	0308-0501	12 months embargo	cannot	yellow		0						USD	2500	2500	New Zealand Ministry of Business Innovation and Employment [UOA X1309]	Materials Science	Yes	FALSE	FALSE	FALSE	FALSE	FALSE	TRUE	FALSE	TRUE	FALSE	FALSE	FALSE	FALSE
10.1002/gcc.22466			closed	A fluorescence in situ hybridization-based screen allows rapid detection of adverse cytogenetic alterations in patients with acute myeloid leukemia	Sandh\\U00F6Fer, Nadine; Metzeler, Klaus H.; Kakadia, Purvi M.; Pasalic, Zlatana; Hiddemann, Wolfgang; Neusser, Michaela; Steinlein, Ortrud; Fiegl, Michael; Subklewe, Marion; Spiekermann, Karsten; Bohlander, Stefan K.; Schneider, Stephanie; Braess, Jan	13	No	Genes, Chromosomes and Cancer	2017	Wiley-Blackwell	FALSE	journal-article		FALSE			No		0	FALSE	1045-2257	12 months embargo	cannot	yellow		0						USD	3600	3600		Oncology; Genetics & Heredity	No	FALSE	FALSE	FALSE	FALSE	FALSE	FALSE	FALSE	FALSE	FALSE	FALSE	FALSE	FALSE
10.1002/gsj.1159			closed	Rethinking Ethnocentrism in International Business Research	Michailova, Snejina; Piekkari, Rebecca; Storgaard, Marianne; Tienari, Janne	4	No	Global Strategy Journal	2017	Wiley-Blackwell	FALSE	journal-article		FALSE			No		0	FALSE	2042-5791	unknown	unknown	gray		5						USD	3000	3000		Business & Economics	Yes	FALSE	FALSE	FALSE	FALSE	FALSE	FALSE	FALSE	FALSE	FALSE	FALSE	FALSE	FALSE
10.1002/hipo.22723			closed	N-terminal SAP97 isoforms differentially regulate synaptic structure and postsynaptic surface pools of AMPA receptors	Goodman, Lucy; Baddeley, David; Ambroziak, Wojciech; Waites, Clarissa L.; Garner, Craig C.; Soeller, Christian; Montgomery, Johanna M.	7	No	Hippocampus	2017	Wiley-Blackwell	FALSE	journal-article		FALSE			No		0	FALSE	1050-9631	12 months embargo	cannot	yellow		4						USD	4100	4100	Auckland Medical Research Foundation; University of Auckland	Neurosciences & Neurology	Yes	FALSE	FALSE	FALSE	FALSE	FALSE	FALSE	TRUE	FALSE	FALSE	FALSE	FALSE	FALSE
10.1002/humu.23311			closed	CNGB3 mutation spectrum including copy number variations in 485 achromatopsia patients	Mayer, Anja K.; Van Cauwenbergh, Caroline; Rother, Christine; Baumann, Britta; Reuter, Peggy; De Baere, Elfride; Wissinger, Bernd; Kohl, Susanne	8	No	Human Mutation	2017	Wiley-Blackwell	FALSE	journal-article		FALSE			No		0	FALSE	1059-7794	12 months embargo	cannot	yellow		8						USD	4500	4500	Deutsche Forschungsgemeinschaft [SFB430 KFO134 KO 2176/1-1 KO 2176/1-2]; Bundesministerium fur Bildung und Forschung [01GM0850 01GM1108A]; Medical Faculty of the University of Tubingen; Belgian Medical Genomics Initiative; Ghent University [BOF15/GOA/011]; Funds for Research in Ophthalmology (FRO); Belspo (IAP) [P7/43]	Genetics & Heredity	No	FALSE	FALSE	FALSE	FALSE	FALSE	FALSE	FALSE	FALSE	FALSE	FALSE	FALSE	FALSE
10.1002/ijc.30590	open (via free pdf)		bronze	Helicobacter pyloriinfection, chronic corpus atrophic gastritis and pancreatic cancer risk in the European Prospective Investigation into Cancer and Nutrition (EPIC) cohort: A nested case-control study	Huang, Jiaqi; Zagai, Ulrika; Hallmans, G\\U00F6Ran; Nyr\\U00E9N, Olof; Engstrand, Lars; Stolzenberg-Solomon, Rachael; Duell, Eric J; Overvad, Kim; Katzke, Verena A; Kaaks, Rudolf; Jenab, Mazda; Park, Jin Young; Murillo, Raul; Trichopoulou, Antonia; Lagiou, Pagona; Bamia, Christina; Bradbury, Kathryn E; Riboli, Elio; Aune, Dagfinn; Tsilidis, Konstantinos K; Capell\\U00E1, Gabriel	42	Yes	International Journal of Cancer	2017	Wiley-Blackwell	TRUE	journal-article		FALSE	publishedVersion	publisher	Yes	pubmedcentral.nih.gov recercat.cat spiral.imperial.ac.uk	3	FALSE	0020-7136	12 months embargo	cannot	yellow		7	https://doi.org/10.1002/ijc.30590					USD	3900	3900	Karolinska Institutet; European Commission; International Agency for Research on Cancer; Danish Cancer Society; Ligue Contre le Cancer; Institut Gustave Roussy; Mutuelle Generale de l'Education Nationale; Institut National de la Sante et de la Recherche Medicale(INSERM; France); German Cancer Aid; Deutsches German Cancer Research Center (DKFZ); Federal Ministry of Education and Research (Germany)…	Oncology	No	FALSE	FALSE	FALSE	FALSE	FALSE	FALSE	FALSE	FALSE	FALSE	FALSE	FALSE	FALSE
10.1002/ijgo.12298	open (via free pdf)		bronze	A systematic review of primary outcomes and outcome measure reporting in randomized trials evaluating treatments for pre-eclampsia	Duffy, James M.N.; Hirsch, Martin; Gale, Chris; Pealing, Louise; Kawsar, Anusuya; Showell, Marian; Williamson, Paula R.; Khan, Khalid S.; Ziebland, Sue; Mcmanus, Richard J.	10	No	International Journal of Gynecology & Obstetrics	2017	Wiley-Blackwell	TRUE	journal-article		FALSE	publishedVersion	publisher	Yes	spiral.imperial.ac.uk	1	FALSE	0020-7292	12 months embargo	cannot	yellow		11	https://obgyn.onlinelibrary.wiley.com/doi/pdf/10.1002/ijgo.12298					USD	3000	3000	National Institute for Health Research (NIHR); Medical Research Council (MRC)	Obstetrics & Gynecology	No	FALSE	FALSE	FALSE	FALSE	FALSE	FALSE	FALSE	FALSE	TRUE	FALSE	FALSE	FALSE
10.1002/jbm.a.36023			closed	Development of organic solvent-free micro-/nano-porous polymer scaffolds for musculoskeletal regeneration	Lin, S. T. C.; Musson, D. S.; Amirapu, S.; Cornish, J.; Bhattacharyya, D.	5	No	Journal of Biomedical Materials Research Part A	2017	Wiley-Blackwell	FALSE	journal-article		FALSE			No		0	FALSE	1549-3296	12 months embargo	cannot	yellow		4						USD	3750	3750	Ministry of Business Innovation and Employment [UOAX 1004]; Auckland Medical Research Foundation [1311002]; Health Research Council of New Zealand; European Union Seventh Framework Programme skeGEN (FP7) [318553]	Engineering; Materials Science	Yes	FALSE	TRUE	FALSE	FALSE	FALSE	TRUE	TRUE	TRUE	FALSE	FALSE	FALSE	FALSE
10.1002/jbmr.3029			closed	Durability of Response to Zoledronate Treatment and Competing Mortality in Paget's Disease of Bone	Cundy, Tim; Maslowski, Katherine; Grey, Andrew; Reid, Ian R	4	No	Journal of Bone and Mineral Research	2017	Wiley-Blackwell	FALSE	journal-article		FALSE			No		0	FALSE	0884-0431	12 months embargo	cannot	yellow		12						USD	3000	3000		Endocrinology & Metabolism	Yes	FALSE	FALSE	FALSE	FALSE	FALSE	FALSE	FALSE	FALSE	FALSE	FALSE	FALSE	FALSE
10.1002/jbmr.3039	open (via free pdf)		bronze	Goal-Directed Treatment for Osteoporosis: A Progress Report From the ASBMR-NOF Working Group on Goal-Directed Treatment for Osteoporosis	Cummings, Steven R; Cosman, Felicia; Lewiecki, E Michael; Schousboe, John T; Bauer, Douglas C; Black, Dennis M; Brown, Thomas D; Cheung, Angela M; Cody, Kathleen; Cooper, Cyrus; Diez-Perez, Adolfo; Eastell, Richard; Hadji, Peyman; Hosoi, Takayuki; Jan De Beur, Suzanne; Kagan, Risa; Kiel, Douglas P; Reid, Ian R; Solomon, Daniel H; Randall, Susan	20	No	Journal of Bone and Mineral Research	2017	Wiley-Blackwell	TRUE	journal-article		FALSE	publishedVersion	publisher	Yes	eprints.whiterose.ac.uk	1	FALSE	0884-0431	12 months embargo	cannot	yellow		36	https://onlinelibrary.wiley.com/doi/pdf/10.1002/jbmr.3039					USD	3000	3000	Amgen; Eli Lilly; Merck; Radius Health; Alexion; Danone; GSK; Medtronic; Nestle; Novartis; Pfizer; Roche; Servier; Shire; Takeda; UCB; AstraZeneca; Chronos; Immunodiagnostic Systems; Fonterra Brands; Ono Pharma; Bayer; Janssen Research; Alere; CL Biosystems; Teijin Pharm; D-Star; Roche Diagnostics; Inverness Medical; Merck Sharp Dohme; Policy Analysis Inc.; Medical Research Council [MC_UU_12011/1…	Endocrinology & Metabolism	No	FALSE	FALSE	FALSE	FALSE	FALSE	FALSE	FALSE	FALSE	TRUE	FALSE	FALSE	FALSE
10.1002/jbmr.3127	open (via free pdf)		bronze	Maintaining Order in Osteoporosis Treatments	Grey, Andrew; Bolland, Mark; Cundy, Tim	3	No	Journal of Bone and Mineral Research	2017	Wiley-Blackwell	TRUE	journal-article		FALSE	publishedVersion	publisher	No		0	FALSE	0884-0431	12 months embargo	cannot	yellow		1	https://onlinelibrary.wiley.com/doi/pdf/10.1002/jbmr.3127					USD	3000	3000		Endocrinology & Metabolism	Yes	FALSE	FALSE	FALSE	FALSE	FALSE	FALSE	FALSE	FALSE	FALSE	FALSE	FALSE	FALSE
10.1002/jcp.25782			closed	Cyclic-glycine-proline accelerates mammary involution by promoting apoptosis and inhibiting IGF-1 function	Singh-Mallah, Gagandeep; Mcmahon, Christopher D.; Guan, Jian; Singh, Kuljeet	4	No	Journal of Cellular Physiology	2017	Wiley-Blackwell	FALSE	journal-article		FALSE			No		0	FALSE	0021-9541	12 months embargo	cannot	yellow		4						USD	4200	4200	Gravida University of Auckland Auckland New Zealand [3709177]; Ministry of Business Innovation and Employment (MBIE) Wellington New Zealand [FRST C10X0702]	Cell Biology; Physiology	Yes	FALSE	FALSE	FALSE	FALSE	FALSE	TRUE	FALSE	TRUE	FALSE	FALSE	FALSE	FALSE
10.1002/jeab.255			closed	Noncontingent reinforcement competes with response performance	Kelley, Michael E.; Nadler, Cy B.; Rey, Catalina; Cowie, Sarah; Podlesnik, Christopher A.	5	No	Journal of the Experimental Analysis of Behavior	2017	Wiley-Blackwell	FALSE	journal-article		FALSE			No		0	FALSE	0022-5002	12 months embargo	cannot	yellow		1						USD	3000	3000		Psychology; Behavioral Sciences	No	FALSE	FALSE	FALSE	FALSE	FALSE	FALSE	FALSE	FALSE	FALSE	FALSE	FALSE	FALSE
10.1002/jeab.260			closed	How do reinforcers affect choice? Preference pulses after responses and reinforcers	Gomes-Ng, Stephanie; Elliffe, Douglas; Cowie, Sarah	3	No	Journal of the Experimental Analysis of Behavior	2017	Wiley-Blackwell	FALSE	journal-article		FALSE			No		0	FALSE	0022-5002	12 months embargo	cannot	yellow		2						USD	3000	3000		Psychology; Behavioral Sciences	Yes	FALSE	FALSE	FALSE	FALSE	FALSE	FALSE	FALSE	FALSE	FALSE	FALSE	FALSE	FALSE
10.1002/jeab.268			closed	Control by past and present stimuli depends on the discriminated reinforcer differential	Cowie, Sarah; Davison, Michael; Elliffe, Douglas	3	No	Journal of the Experimental Analysis of Behavior	2017	Wiley-Blackwell	FALSE	journal-article		FALSE			No		0	FALSE	0022-5002	12 months embargo	cannot	yellow		3						USD	3000	3000		Psychology; Behavioral Sciences	Yes	FALSE	FALSE	FALSE	FALSE	FALSE	FALSE	FALSE	FALSE	FALSE	FALSE	FALSE	FALSE
10.1002/jeab.272			closed	Generalization of the disruptive effects of alternative stimuli when combined with target stimuli in extinction	Podlesnik, Christopher A.; Miranda-Dukoski, Ludmila; Jonas Chan, C. K.; Bland, Vikki J.; Bai, John Y. H.	5	No	Journal of the Experimental Analysis of Behavior	2017	Wiley-Blackwell	FALSE	journal-article		FALSE			No		0	FALSE	0022-5002	12 months embargo	cannot	yellow		2						USD	3000	3000	Animal Ethics Committee of The University of Auckland [AEC/2011/RT909]	Psychology; Behavioral Sciences	No	FALSE	FALSE	FALSE	FALSE	FALSE	FALSE	FALSE	FALSE	FALSE	FALSE	FALSE	FALSE
10.1002/jhbp.503	open (via free pdf)		bronze	Delphi consensus on bile duct injuries during laparoscopic cholecystectomy: An evolutionary cul-de-sac or the birth pangs of a new technical framework?	Iwashita, Yukio; Hibi, Taizo; Ohyama, Tetsuji; Umezawa, Akiko; Takada, Tadahiro; Strasberg, Steven M.; Asbun, Horacio J.; Pitt, Henry A.; Han, Ho-Seong; Hwang, Tsann-Long; Suzuki, Kenji; Yoon, Yoo-Seok; Choi, In-Seok; Yoon, Dong-Sup; Huang, Wayne Shih-Wei; Yoshida, Masahiro; Wakabayashi, Go; Miura, Fumihiko; Okamoto, Kohji; Endo, Itaru; De Santiba\\U00F1Es, Eduardo	60	Yes	Journal of Hepato-Biliary-Pancreatic Sciences	2017	Wiley-Blackwell	TRUE	journal-article		FALSE	publishedVersion	publisher	Yes	pure.ed.ac.uk	1	FALSE	1868-6974	12 months embargo	cannot	green		6	https://onlinelibrary.wiley.com/doi/pdf/10.1002/jhbp.503					USD	3000	3000		Gastroenterology & Hepatology; Surgery	No	FALSE	FALSE	FALSE	FALSE	FALSE	FALSE	FALSE	FALSE	FALSE	FALSE	FALSE	FALSE
10.1002/jnr.23898	open (via free pdf)		bronze	Sexual dimorphism of Broca's region: More gray matter in female brains in Brodmann areas 44 and 45	Kurth, Florian; Jancke, Lutz; Luders, Eileen	3	No	Journal of Neuroscience Research	2017	Wiley-Blackwell	TRUE	journal-article		FALSE	publishedVersion	publisher	Yes	pubmedcentral.nih.gov	1	FALSE	0360-4012	12 months embargo	cannot	yellow		8	https://doi.org/10.1002/jnr.23898					USD	3300	3300	National Institute of Child Health and Human Development [R01HD081720]	Neurosciences & Neurology	No	FALSE	FALSE	FALSE	FALSE	FALSE	FALSE	FALSE	FALSE	FALSE	FALSE	FALSE	FALSE
10.1002/joc.4780	oa repository (via OAI-PMH title and first author match)		green	Tropospheric moisture in the Southwest Pacific as revealed by homogenized radiosonde data: climatology and decadal trend	Li, Ning; Bellon, Gilles; Mcgregor, Glenn	3	No	International Journal of Climatology	2017	Wiley-Blackwell	TRUE	journal-article		FALSE	acceptedVersion	repository	Yes	dro.dur.ac.uk.OAI2	1	FALSE	0899-8418	12 months embargo	cannot	yellow		1	http://dro.dur.ac.uk/18807/1/18807.pdf					USD	3000	3000		Meteorology & Atmospheric Sciences	Yes	FALSE	FALSE	FALSE	FALSE	FALSE	FALSE	FALSE	FALSE	FALSE	FALSE	FALSE	FALSE
10.1002/jqs.2955			closed	Last Glacial pollen-climate reconstructions from Northland, New Zealand	Newnham, R.M.; Alloway, B. V.; Holt, K.A.; Butler, K.; Rees, A.B.H.; Wilmshurst, J.M.; Dunbar, G.; Hajdas, I.	8	No	Journal of Quaternary Science	2017	Wiley-Blackwell	FALSE	journal-article		FALSE			No		0	FALSE	0267-8179	12 months embargo	cannot	yellow		7						USD	3000	3000	Marsden Fund [MAU 305]	Physical Geography; Geology	Yes	FALSE	FALSE	FALSE	TRUE	TRUE	FALSE	FALSE	TRUE	FALSE	FALSE	FALSE	FALSE
10.1002/jsfa.8066			closed	Optimization of polyphenol removal from kiwifruit juice using a macroporous resin	Gao, Zhenpeng; Yu, Zhifang; Yue, Tianli; Quek, Siew Young	4	No	Journal of the Science of Food and Agriculture	2017	Wiley-Blackwell	FALSE	journal-article		FALSE			No		0	FALSE	0022-5142	12 months embargo	cannot	yellow		3						USD	3900	3900	Specific Innovation Project for Science and Technology of Shaanxi Province [2015KTCL02-02]; Twelfth Five-Year-Plan of China [2012BAK17B06]	Agriculture; Chemistry; Food Science & Technology	Yes	FALSE	FALSE	FALSE	FALSE	FALSE	FALSE	FALSE	FALSE	FALSE	FALSE	FALSE	FALSE
10.1002/mds.27176	open (via page says license)	cc-by	hybrid	The Cats-and-Dogs test: A tool to identify visuoperceptual deficits in Parkinson's disease	Weil, Rimona S.; Pappa, Katerina; Schade, Rachel N.; Schrag, Anette E.; Bahrami, Bahador; Schwarzkopf, Dietrich S.; Crutch, Sebastian J; O\'Keeffe, Aidan G.; Morris, Huw R.	9	No	Movement Disorders	2017	Wiley-Blackwell	TRUE	journal-article		FALSE	publishedVersion	publisher	Yes	pubmedcentral.nih.gov eprints.ucl.ac.uk.OAI2	2	FALSE	0885-3185	12 months embargo	cannot	yellow		4	https://doi.org/10.1002/mds.27176					USD	3000	3000	UCL Excellence Fellowship; Academy of Medical Sciences; UCLH Biomedical Research Centre Grant; European Research Council (ERC) starting grant NEUROCODEC [309865]; ERC starting grant WMOSPOTWU [310829]; ESRC/NIHR [ES/L001810/1]; EPSRC [EP/M006093/1]; Alzheimer's Research UK Senior Research Fellowship [ARUK-SRF2013-8]; Wellcome Trust [106882/Z/15/Z]; Medical Research Council UK; Parkinson's UK; Ips…	Neurosciences & Neurology	No	FALSE	FALSE	FALSE	FALSE	FALSE	FALSE	FALSE	FALSE	TRUE	FALSE	FALSE	FALSE
10.1002/mp.12071			closed	A computer-aided diagnostic system for detecting diabetic retinopathy in optical coherence tomography images	Eltanboly, Ahmed; Ismail, Marwa; Shalaby, Ahmed; Switala, Andy; El-Baz, Ayman; Schaal, Shlomit; Gimel\\U2019Farb, Georgy; El-Azab, Magdi	8	No	Medical Physics	2017	Wiley-Blackwell	FALSE	journal-article		FALSE			No		0	FALSE	0094-2405	12 months embargo	cannot	yellow		14						USD	2500	2500		Radiology, Nuclear Medicine & Medical Imaging	No	FALSE	FALSE	FALSE	FALSE	FALSE	FALSE	FALSE	FALSE	FALSE	FALSE	FALSE	FALSE
10.1002/oby.21715	open (via free pdf)		bronze	Clinical and biochemical factors associated with preeclampsia in women with obesity	Vieira, Matias C.; Poston, Lucilla; Fyfe, Elaine; Gillett, Alexandra; Kenny, Louise C.; Roberts, Claire T.; Baker, Philip N.; Myers, Jenny E.; Walker, James J.; Mccowan, Lesley M.; North, Robyn A.; Pasupathy, Dharmintra	12	No	Obesity	2017	Wiley-Blackwell	TRUE	journal-article		FALSE	publishedVersion	publisher	Yes	lra.le.ac.uk	1	FALSE	1930-7381	12 months embargo	cannot	yellow		5	https://onlinelibrary.wiley.com/doi/pdf/10.1002/oby.21715					USD	3500	3500	Science Without Borders Fellowship Brazil [BEX: 9571/13-2]; Science Foundation Ireland Program Grant for INFANT [12/RC/2272]; National Health and Medical Research Council (NHMRC) [APP1020749]; University of Auckland; New Enterprise Research Fund; Foundation for Research Science and Technology; Health Research Council; Evelyn Bond Fund; Auckland District Health Board Charitable Trust; University o…	Endocrinology & Metabolism; Nutrition & Dietetics	No	FALSE	FALSE	FALSE	FALSE	FALSE	FALSE	FALSE	FALSE	TRUE	FALSE	FALSE	FALSE
10.1002/oby.21919	open (via free pdf)		bronze	Oral contraceptive pill alters acute dietary protein-induced thermogenesis in young women	Duhita, Maharani Retna; Schutz, Yves; Montani, Jean-Pierre; Dulloo, Abdul G.; Miles-Chan, Jennifer L.	5	No	Obesity	2017	Wiley-Blackwell	TRUE	journal-article		FALSE	publishedVersion	publisher	No		0	FALSE	1930-7381	12 months embargo	cannot	yellow		1	https://onlinelibrary.wiley.com/doi/pdf/10.1002/oby.21919					USD	3500	3500	Department of Medicine University of Fribourg; Swiss Government Excellence Scholarship for Foreign Scholars	Endocrinology & Metabolism; Nutrition & Dietetics	No	FALSE	FALSE	FALSE	FALSE	FALSE	FALSE	FALSE	FALSE	FALSE	FALSE	FALSE	FALSE
10.1002/oby.21967	open (via free pdf)		bronze	A Novel Home-Based Intervention for Child and Adolescent Obesity: The Results of the WhÄnau Pakari Randomized Controlled Trial	Anderson, Yvonne C.; Wynter, Lisa E.; Grant, Cameron C.; Cave, Tami L.; Derraik, Jos\\U00E9 G. B.; Cutfield, Wayne S.; Hofman, Paul L.	7	No	Obesity	2017	Wiley-Blackwell	TRUE	journal-article		FALSE	publishedVersion	publisher	No		0	FALSE	1930-7381	12 months embargo	cannot	yellow		3	https://onlinelibrary.wiley.com/doi/pdf/10.1002/oby.21967					USD	3500	3500	Health Research Council of New Zealand; Royal Australasian College of Physicians; Maurice and Phyllis Paykel Trust; Taranaki Medical Foundation; Lotteries Health Research Committee	Endocrinology & Metabolism; Nutrition & Dietetics	Yes	FALSE	TRUE	FALSE	FALSE	FALSE	FALSE	FALSE	TRUE	FALSE	FALSE	FALSE	FALSE
10.1002/oby.21985	oa repository (via pmcid lookup)		green	Obesity Triggers: Sequencing the Genome Versus Sequencing the Environment	Bogardus, Clifton; Swinburn, Boyd	2	No	Obesity	2017	Wiley-Blackwell	TRUE	journal-article		FALSE	acceptedVersion	repository	No	no_oai_data	1	FALSE	1930-7381	12 months embargo	cannot	yellow		0	https://www.ncbi.nlm.nih.gov/pmc/articles/PMC5708890					USD	3500	3500	NULL [Z99 DK999999]	Endocrinology & Metabolism; Nutrition & Dietetics	No	FALSE	FALSE	FALSE	FALSE	FALSE	FALSE	FALSE	FALSE	FALSE	FALSE	FALSE	FALSE
10.1002/pds.4186			closed	Medical specialists' attitudes to prescribing biosimilars	Hemmington, Amy; Dalbeth, Nicola; Jarrett, Paul; Fraser, Alan G.; Broom, Reuben; Browett, Peter; Petrie, Keith J.	7	No	Pharmacoepidemiology and Drug Safety	2017	Wiley-Blackwell	FALSE	journal-article		FALSE			No		0	FALSE	1053-8569	12 months embargo	cannot	yellow		12						USD	4000	4000	PHARMAC (New Zealand Government's Pharmaceutical Management Agency)	Public, Environmental & Occupational Health; Pharmacology & Pharmacy	Yes	FALSE	FALSE	FALSE	FALSE	FALSE	FALSE	FALSE	FALSE	FALSE	FALSE	FALSE	FALSE
10.1002/pi.5452			closed	Dopant macroinitiator for electropolymerisation and functionalisation of conducting polymer thin films	Strover, Lisa T; Hackett, Alissa J; Travas-Sejdic, Jadranka; Malmstr\\U00F6M, Jenny	4	No	Polymer International	2017	Wiley-Blackwell	FALSE	journal-article		FALSE			No		0	FALSE	0959-8103	12 months embargo	cannot	yellow		1						USD	3700	3700	University of Auckland; MacDiarmid Institute for Advanced Materials	Polymer Science	Yes	FALSE	FALSE	FALSE	FALSE	FALSE	FALSE	FALSE	FALSE	FALSE	FALSE	FALSE	FALSE
10.1002/prot.25303			closed	Crystal structure of a bicupin protein HutD involved in histidine utilization in Pseudomonas	Gerth, M.L.; Liu, Y.; Jiao, W.; Zhang, X.-X.; Baker, E.N.; Lott, J.S.; Rainey, P.B.; Johnston, J.M.	8	No	Proteins: Structure, Function, and Bioinformatics	2017	Wiley-Blackwell	FALSE	journal-article		FALSE			No		0	FALSE	0887-3585	12 months embargo	cannot	yellow		1						USD	3800	3800	New Zealand Foundation for Science Research and Technology (FRST)	Biochemistry & Molecular Biology; Biophysics	Yes	FALSE	FALSE	FALSE	FALSE	FALSE	FALSE	FALSE	FALSE	FALSE	FALSE	FALSE	FALSE
10.1002/ps.4599			closed	Dose reduction and alternatives to the phenol pheromone in monitoring and management of the grass grub Costelytra zealandica	Harper, Aimee R; Unelius, C Rikard; Townsend, Richard J; Suckling, David Maxwell	4	No	Pest Management Science	2017	Wiley-Blackwell	FALSE	journal-article		FALSE			No		0	FALSE	1526-498X	12 months embargo	cannot	yellow		0						USD	4400	4400	New Zealand Ministry of Business Innovation and Employment through the Bio-Protection Research Centre [LINX0807]; Linnaeus University Kalmar Sweden	Agriculture; Entomology	No	FALSE	FALSE	FALSE	FALSE	FALSE	TRUE	FALSE	TRUE	FALSE	FALSE	FALSE	FALSE
10.1002/psp4.12161	open (via page says license)	cc-by-nc-nd	gold	Model Evaluation of Continuous Data Pharmacometric Models: Metrics and Graphics	Nguyen, T. H. T.; Mouksassi, M\\U2010S; Holford, N; Al\\U2010Huniti, N; Freedman, I; Hooker, A. C.; John, J.; Karlsson, M. O.; Mould, D. R.; P\\U00E9Rez Ruixo, J. J.; Plan, E. L.; Savic, R; Van Hasselt, J. G. C.; Weber, B; Zhou, C; Comets, E; Mentr\\U00E9, F	17	No	CPT: Pharmacometrics & Systems Pharmacology	2017	Wiley-Blackwell	TRUE	journal-article		TRUE	publishedVersion	publisher	Yes	pubmedcentral.nih.gov openaccess.leidenuniv.nl DiVA.org	3	TRUE	2163-8306	can	can	green	CC-BY-NC	46	https://doi.org/10.1002/psp4.12161	Yes	USD	3000		USD	3000	3000		Pharmacology & Pharmacy	No	FALSE	FALSE	FALSE	FALSE	FALSE	FALSE	FALSE	FALSE	FALSE	FALSE	FALSE	FALSE
10.1002/psp4.12196	open (via page says license)	cc-by-nc	gold	Advanced Methods for Dose and Regimen Finding During Drug Development: Summary of the EMA/EFPIA Workshop on Dose Finding (London 4-5 December 2014)	Musuamba, Ft; Manolis, E; Holford, N; Cheung, Sya; Friberg, Le; Ogungbenro, K; Posch, M; Yates, Jwt; Berry, S; Thomas, N; Corriol-Rohou, S; Bornkamp, B; Bretz, F; Hooker, Ac; Van Der Graaf, Ph; Standing, Jf; Hay, J; Cole, S; Gigante, V; Karlsson, K; Dumortier, T	28	Yes	CPT: Pharmacometrics & Systems Pharmacology	2017	Wiley-Blackwell	TRUE	journal-article		TRUE	publishedVersion	publisher	Yes	pubmedcentral.nih.gov eprints.ucl.ac.uk.OAI2	2	TRUE	2163-8306	can	can	green	CC-BY-NC	10	https://doi.org/10.1002/psp4.12196	Yes	USD	3000		USD	3000	3000	European Union's Seventh Framework Programme for research technological development [603160]	Pharmacology & Pharmacy	No	FALSE	FALSE	FALSE	FALSE	FALSE	FALSE	FALSE	FALSE	FALSE	FALSE	FALSE	FALSE
10.1002/psp4.12222	open (via page says license)	cc-by-nc	gold	Model Description Language (MDL): A Standard for Modeling and Simulation	Smith, Mike K.; Moodie, Stuart L.; Bizzotto, Roberto; Blaudez, Eric; Borella, Elisa; Carrara, Letizia; Chan, Phylinda; Chenel, Marylore; Comets, Emmanuelle; Gieschke, Ronald; Harling, Kajsa; Harnisch, Lutz; Hartung, Niklas; Hooker, Andrew C.; Karlsson, Mats O.; Kaye, Richard; Kloft, Charlotte; Kokash, Natallia; Lavielle, Marc; Lestini, Giulia; Magni, Paolo	36	Yes	CPT: Pharmacometrics & Systems Pharmacology	2017	Wiley-Blackwell	TRUE	journal-article		TRUE	publishedVersion	publisher	Yes	pubmedcentral.nih.gov	1	TRUE	2163-8306	can	can	green	CC-BY-NC	9	https://doi.org/10.1002/psp4.12222	Yes	USD	3000		USD	3000	3000	Innovative Medicines Initiative Joint Undertaking from the European Union's Seventh Framework Programme (FP7) [115156]; EFPIA company	Pharmacology & Pharmacy	No	FALSE	FALSE	FALSE	FALSE	FALSE	FALSE	FALSE	FALSE	FALSE	FALSE	FALSE	FALSE
10.1002/rnc.3575			closed	Finite-time stabilization of Markovian jump delay systems - a switching control approach	Wen, Jiwei; Nguang, Sing Kiong; Shi, Peng; Peng, Li	4	No	International Journal of Robust and Nonlinear Control	2017	Wiley-Blackwell	FALSE	journal-article		FALSE			No		0	FALSE	1049-8923	12 months embargo	cannot	yellow		13						USD	2500	2500	National Natural Science Foundation of China [61203126 61374047 61403167]; 111 Project [B12018]; China Scholarship Council [201506795006]	Automation & Control Systems; Engineering; Mathematics	No	FALSE	FALSE	FALSE	FALSE	FALSE	FALSE	FALSE	FALSE	FALSE	FALSE	FALSE	FALSE
10.1002/sia.6327			closed	The surface chemistry of metallurgical aluminas	Mcintosh, Grant J.; Metson, James B.; Hyland, Margaret M.	3	No	Surface and Interface Analysis	2017	Wiley-Blackwell	FALSE	journal-article		FALSE			No		0	FALSE	0142-2421	12 months embargo	cannot	yellow		2						USD	3400	3400	Outotec	Chemistry	Yes	FALSE	FALSE	FALSE	FALSE	FALSE	FALSE	FALSE	FALSE	FALSE	FALSE	FALSE	FALSE
10.1002/slct.201702144			closed	Development and Application of an NMR-Based Assay for Polyphenol Oxidases	Li, Yu; Zafar, Ayesha; Kilmartin, Paul A.; Reynisson, J\\U00F3Hannes; Leung, Ivanhoe K. H.	5	No	ChemistrySelect	2017	Wiley-Blackwell	FALSE	journal-article		FALSE			No		0	FALSE	2365-6549	12 months embargo	cannot	yellow		0						USD	3000	3000	University of Auckland	Chemistry	Yes	FALSE	FALSE	FALSE	FALSE	FALSE	FALSE	FALSE	FALSE	FALSE	FALSE	FALSE	FALSE
10.1002/smi.2742			closed	College instruction is not so stress free after all: A qualitative and quantitative study of academic entitlement, uncivil behaviors, and instructor strain and burnout	Jiang, Lixin; Tripp, Thomas M.; Hong, Phan Y.	3	No	Stress and Health	2017	Wiley-Blackwell	FALSE	journal-article		FALSE			No		0	FALSE	1532-3005	12 months embargo	cannot	yellow		3						USD	2500	2500		Psychology; Psychiatry	No	FALSE	FALSE	FALSE	FALSE	FALSE	FALSE	FALSE	FALSE	FALSE	FALSE	FALSE	FALSE
10.1002/solr.201700126			closed	Recent Progress in Photocatalytic CO2 Reduction Over Perovskite Oxides	Shi, Run; Waterhouse, Geoffrey I.N.; Zhang, Tierui	3	No	Solar RRL	2017	Wiley-Blackwell	FALSE	journal-article		FALSE			No		0	FALSE	2367-198X	unknown	unknown	gray		39									Ministry of Science and Technology of China [2014CB239402 2013CB834505]; National Key Projects for Fundamental Research and Development of China [2016YFB0600901 2017YFA0206904 2017YFA0206900]; National Natural Science Foundation of China [U1662118 51572270 51772305 21401207]; Strategic Priority Research Program of the Chinese Academy of Sciences [XDB17030300]; Youth Innovation Promotion Associati…	Materials Science	No	FALSE	FALSE	FALSE	FALSE	FALSE	FALSE	FALSE	FALSE	FALSE	FALSE	FALSE	FALSE
10.1002/trtr.1547			closed	Instructional Frameworks forÂ QualityÂ Talk About Text: ChoosingÂ the Best Approach	Lightner, Sarah C.; Wilkinson, Ian A.G.	2	No	The Reading Teacher	2017	Wiley-Blackwell	FALSE	journal-article		FALSE			No		0	FALSE	0034-0561	6 months embargo	cannot	white		1						USD	3000	3000	Institute of Education Sciences U.S. Department of Education (PR) [R305G020075]	Education & Educational Research	No	FALSE	FALSE	FALSE	FALSE	FALSE	FALSE	FALSE	FALSE	FALSE	FALSE	FALSE	FALSE
10.1002/wcs.1443			closed	Mental rotation: an examination of assumptions	Searle, Jordan A.; Hamm, Jeff P.	2	No	Wiley Interdisciplinary Reviews: Cognitive Science	2017	Wiley-Blackwell	FALSE	journal-article		FALSE			No		0	FALSE	1939-5078	12 months embargo	cannot	yellow		3						USD	3100	3100		Psychology	Yes	FALSE	FALSE	FALSE	FALSE	FALSE	FALSE	FALSE	FALSE	FALSE	FALSE	FALSE	FALSE
10.1002/wsbm.1353			closed	Mathematical modeling of the female reproductive system: from oocyte to delivery	Clark, Alys R; Kruger, Jennifer A	2	No	Wiley Interdisciplinary Reviews: Systems Biology and Medicine	2017	Wiley-Blackwell	FALSE	journal-article		FALSE			No		0	FALSE	1939-5094	12 months embargo	cannot	yellow		2						USD	3500	3500		Research & Experimental Medicine	Yes	FALSE	FALSE	FALSE	FALSE	FALSE	FALSE	FALSE	FALSE	FALSE	FALSE	FALSE	FALSE
10.1002/wsbm.1368	oa repository (via OAI-PMH title and first author match)	cc-by-nc-nd	green	Toward modeling locomotion using electromyography-informed 3D models: application to cerebral palsy	Sartori, M.; Fernandez, J. W.; Modenese, L.; Carty, C. P.; Barber, L. A.; Oberhofer, K.; Zhang, J.; Handsfield, G. G.; Stott, N. S.; Besier, T. F.; Farina, D.; Lloyd, D. G.	12	No	Wiley Interdisciplinary Reviews: Systems Biology and Medicine	2017	Wiley-Blackwell	TRUE	journal-article		FALSE	acceptedVersion	repository	Yes	spiral.imperial.ac.uk	1	FALSE	1939-5094	12 months embargo	cannot	yellow		8	http://spiral.imperial.ac.uk/bitstream/10044/1/48153/2/Sartori_Fernandez_et_al_2016_WIRES.pdf					USD	3500	3500		Research & Experimental Medicine	Yes	FALSE	FALSE	FALSE	FALSE	FALSE	FALSE	FALSE	FALSE	FALSE	FALSE	FALSE	FALSE
10.1002/wsbm.1392			closed	Image-based computational fluid dynamics in the lung: virtual reality or new clinical practice?	Burrowes, Kelly S.; De Backer, Jan; Kumar, Haribalan	3	No	Wiley Interdisciplinary Reviews: Systems Biology and Medicine	2017	Wiley-Blackwell	FALSE	journal-article		FALSE			No		0	FALSE	1939-5094	12 months embargo	cannot	yellow		2						USD	3500	3500		Research & Experimental Medicine	Yes	FALSE	FALSE	FALSE	FALSE	FALSE	FALSE	FALSE	FALSE	FALSE	FALSE	FALSE	FALSE
10.1007/8904_2017_73	oa repository (via pmcid lookup)		green	Compound Heterozygous Inheritance of Mutations in Coenzyme Q8A Results in Autosomal Recessive Cerebellar Ataxia and Coenzyme Q10 Deficiency in a Female Sib-Pair	Jacobsen, Jessie C.; Whitford, Whitney; Swan, Brendan; Taylor, Juliet; Love, Donald R.; Hill, Rosamund; Molyneux, Sarah; George, Peter M.; Mackay, Richard; Robertson, Stephen P.; Snell, Russell G.; Lehnert, Klaus	12	No	JIMD Reports	2017	Springer Berlin Heidelberg	TRUE	book-chapter		FALSE	publishedVersion	repository	No	no_oai_data	1	FALSE	2192-8312	12 months embargo	cannot	yellow		1	https://www.ncbi.nlm.nih.gov/pmc/articles/PMC6226395								University of Auckland; OPEN MINDS; Royal Society of New Zealand; Neurological Foundation of New Zealand; Society for Pediatric Research		Yes	FALSE	FALSE	FALSE	FALSE	TRUE	FALSE	FALSE	TRUE	FALSE	FALSE	FALSE	FALSE
10.1007/978-3-319-50062-1_42	oa repository (via OAI-PMH title and first author match)		green	Lowness, Randomness, and Computable Analysis	Nies, Andr\\U00E9	1	No	Lecture Notes in Computer Science	2017	Springer International Publishing	TRUE	book-chapter		FALSE	submittedVersion	repository	Yes	arXiv.org	1	FALSE	1611-3349	No information	No information	No information		0	http://arxiv.org/abs/1607.07030										Yes	FALSE	FALSE	FALSE	FALSE	FALSE	FALSE	FALSE	FALSE	FALSE	FALSE	FALSE	FALSE
10.1007/978-3-319-51436-9_2			closed	Zebrafish Pronephros Development	Naylor, Richard W.; Qubisi, Sarah S.; Davidson, Alan J.	3	No	Kidney Development and Disease	2017	Springer International Publishing	FALSE	book-chapter		FALSE			No		0	FALSE	1861-0412	unknown	unknown	gray		0											Yes	FALSE	FALSE	FALSE	FALSE	FALSE	FALSE	FALSE	FALSE	FALSE	FALSE	FALSE	FALSE
10.1007/JHEP01(2017)076	open (via page says license)	cc-by	diamond	Search for high-mass ZÎ³ resonances in e+eâˆ’Î³ and Î¼ + Î¼ âˆ’Î³ final states in proton-proton collisions at s = 8 $$ \sqrt{s}=8 $$ and 13 TeV	Khachatryan, V.; Sirunyan, A. M.; Tumasyan, A.; Adam, W.; Asilar, E.; Bergauer, T.; Brandstetter, J.; Brondolin, E.; Dragicevic, M.; Er\\U00F6, J.; Flechl, M.; Friedl, M.; Fr\\U00Fchwirth, R.; Ghete, V. M.; Hartl, C.; H\\U00F6Rmann, N.; Hrubec, J.; Jeitler, M.; K\\U00F6Nig, A.; Kr\\U00E4Tschmer, I.; Liko, D.	2271	Yes	Journal of High Energy Physics	2017	Springer Nature	TRUE	journal-article		TRUE	publishedVersion	publisher	Yes	kuscholarworks.ku.edu cds.cern.ch eprints.whiterose.ac.uk spiral.imperial.ac.uk archive.ugent.be eprints.soton.ac.uk arXiv.org digibuo.uniovi.es	8	TRUE	1029-8479	can	can	green	CC-BY4.0	3	https://doi.org/10.1007/jhep01(2017)076	No			0			0			No	FALSE	FALSE	FALSE	FALSE	FALSE	FALSE	FALSE	FALSE	FALSE	FALSE	FALSE	FALSE
10.1007/JHEP02(2017)028	open (via page says license)	cc-by	diamond	Search for anomalous Wtb couplings and flavour-changing neutral currents in t-channel single top quark production in pp collisions at s = 7 $$ \sqrt{s}=7 $$ and 8 TeV	Khachatryan, V.; Sirunyan, A. M.; Tumasyan, A.; Adam, W.; Asilar, E.; Bergauer, T.; Brandstetter, J.; Brondolin, E.; Dragicevic, M.; Er\\U00F6, J.; Flechl, M.; Friedl, M.; Fr\\U00Fchwirth, R.; Ghete, V. M.; Hartl, C.; H\\U00F6Rmann, N.; Hrubec, J.; Jeitler, M.; K\\U00F6Nig, A.; Kr\\U00E4Tschmer, I.; Liko, D.	2259	Yes	Journal of High Energy Physics	2017	Springer Nature	TRUE	journal-article		TRUE	publishedVersion	publisher	Yes	kuscholarworks.ku.edu cds.cern.ch eprints.whiterose.ac.uk spiral.imperial.ac.uk archive.ugent.be eprints.soton.ac.uk repositorio.unesp.br arXiv.org digibuo.uniovi.es comum.rcaap.pt	10	TRUE	1029-8479	can	can	green	CC-BY4.0	12	https://doi.org/10.1007/jhep02(2017)028	No			0			0			No	FALSE	FALSE	FALSE	FALSE	FALSE	FALSE	FALSE	FALSE	FALSE	FALSE	FALSE	FALSE
10.1007/JHEP02(2017)048	open (via page says license)	cc-by	diamond	Search for heavy resonances decaying to tau lepton pairs in proton-proton collisions at s = 13 $$ \sqrt{s}=13 $$ TeV	Khachatryan, V.; Sirunyan, A. M.; Tumasyan, A.; Adam, W.; Asilar, E.; Bergauer, T.; Brandstetter, J.; Brondolin, E.; Dragicevic, M.; Er\\U00F6, J.; Flechl, M.; Friedl, M.; Fr\\U00Fchwirth, R.; Ghete, V. M.; Hartl, C.; H\\U00F6Rmann, N.; Hrubec, J.; Jeitler, M.; K\\U00F6Nig, A.; Kr\\U00E4Tschmer, I.; Liko, D.	2282	Yes	Journal of High Energy Physics	2017	Springer Nature	TRUE	journal-article		TRUE	publishedVersion	publisher	Yes	kuscholarworks.ku.edu cds.cern.ch eprints.whiterose.ac.uk spiral.imperial.ac.uk eprints.soton.ac.uk repositorio.unesp.br arXiv.org comum.rcaap.pt	8	TRUE	1029-8479	can	can	green	CC-BY4.0	10	https://doi.org/10.1007/jhep02(2017)048	No			0			0			No	FALSE	FALSE	FALSE	FALSE	FALSE	FALSE	FALSE	FALSE	FALSE	FALSE	FALSE	FALSE
10.1007/JHEP02(2017)079	open (via page says license)	cc-by	diamond	Search for top quark decays via Higgs-boson-mediated flavor-changing neutral currents in pp collisions at s = 8 $$ \sqrt{s}=8 $$ TeV	Khachatryan, V.; Sirunyan, A. M.; Tumasyan, A.; Adam, W.; Asilar, E.; Bergauer, T.; Brandstetter, J.; Brondolin, E.; Dragicevic, M.; Er\\U00F6, J.; Flechl, M.; Friedl, M.; Fr\\U00Fchwirth, R.; Ghete, V. M.; Hartl, C.; H\\U00F6Rmann, N.; Hrubec, J.; Jeitler, M.; K\\U00F6Nig, A.; Kr\\U00E4Tschmer, I.; Liko, D.	2257	Yes	Journal of High Energy Physics	2017	Springer Nature	TRUE	journal-article		TRUE	publishedVersion	publisher	Yes	kuscholarworks.ku.edu cds.cern.ch eprints.whiterose.ac.uk spiral.imperial.ac.uk archive.ugent.be eprints.soton.ac.uk arXiv.org comum.rcaap.pt	8	TRUE	1029-8479	can	can	green	CC-BY4.0	9	https://doi.org/10.1007/jhep02(2017)079	No			0			0			No	FALSE	FALSE	FALSE	FALSE	FALSE	FALSE	FALSE	FALSE	FALSE	FALSE	FALSE	FALSE
10.1007/JHEP02(2017)096	open (via page says license)	cc-by	diamond	Measurement of the transverse momentum spectra of weak vector bosons produced in proton-proton collisions at s = 8 $$ \sqrt{s}=8 $$ TeV	Khachatryan, V.; Sirunyan, A. M.; Tumasyan, A.; Adam, W.; Asilar, E.; Bergauer, T.; Brandstetter, J.; Brondolin, E.; Dragicevic, M.; Er\\U00F6, J.; Flechl, M.; Friedl, M.; Fr\\U00Fchwirth, R.; Ghete, V. M.; Hartl, C.; H\\U00F6Rmann, N.; Hrubec, J.; Jeitler, M.; K\\U00F6Nig, A.; Krammer, M.; Kr\\U00E4Tschmer, I.	2300	Yes	Journal of High Energy Physics	2017	Springer Nature	TRUE	journal-article		TRUE	publishedVersion	publisher	Yes	kuscholarworks.ku.edu digibuo.uniovi.es eprints.whiterose.ac.uk spiral.imperial.ac.uk archive.ugent.be eprints.soton.ac.uk repositorio.unesp.br arXiv.org cds.cern.ch comum.rcaap.pt	10	TRUE	1029-8479	can	can	green	CC-BY4.0	2	https://doi.org/10.1007/jhep02(2017)096	No			0			0			No	FALSE	FALSE	FALSE	FALSE	FALSE	FALSE	FALSE	FALSE	FALSE	FALSE	FALSE	FALSE
10.1007/JHEP02(2017)135	open (via page says license)	cc-by	diamond	Searches for invisible decays of the Higgs boson in pp collisions at s $$ \sqrt{s} $$ = 7, 8, and 13 TeV	Khachatryan, V.; Sirunyan, A. M.; Tumasyan, A.; Adam, W.; Asilar, E.; Bergauer, T.; Brandstetter, J.; Brondolin, E.; Dragicevic, M.; Er\\U00F6, J.; Flechl, M.; Friedl, M.; Fr\\U00Fchwirth, R.; Ghete, V. M.; Hartl, C.; H\\U00F6Rmann, N.; Hrubec, J.; Jeitler, M.; K\\U00F6Nig, A.; Kr\\U00E4Tschmer, I.; Liko, D.	2273	Yes	Journal of High Energy Physics	2017	Springer Nature	TRUE	journal-article		TRUE	publishedVersion	publisher	Yes	archive.ugent.be arXiv.org kuscholarworks.ku.edu cds.cern.ch digibuo.uniovi.es eprints.whiterose.ac.uk spiral.imperial.ac.uk comum.rcaap.pt eprints.soton.ac.uk repositorio.unesp.br	10	TRUE	1029-8479	can	can	green	CC-BY4.0	43	https://doi.org/10.1007/jhep02(2017)135	No			0			0			No	FALSE	FALSE	FALSE	FALSE	FALSE	FALSE	FALSE	FALSE	FALSE	FALSE	FALSE	FALSE
10.1007/JHEP03(2017)032	open (via page says license)	cc-by	diamond	Measurement of the transverse momentum spectrum of the Higgs boson produced in pp collisions at s = 8 $$ \sqrt{s}=8 $$ TeV using H â†’ WW decays	Khachatryan, V.; Sirunyan, A. M.; Tumasyan, A.; Adam, W.; Asilar, E.; Bergauer, T.; Brandstetter, J.; Brondolin, E.; Dragicevic, M.; Er\\U00F6, J.; Flechl, M.; Friedl, M.; Fr\\U00Fchwirth, R.; Ghete, V. M.; Hartl, C.; H\\U00F6Rmann, N.; Hrubec, J.; Jeitler, M.; K\\U00F6Nig, A.; Kr\\U00E4Tschmer, I.; Liko, D.	2259	Yes	Journal of High Energy Physics	2017	Springer Nature	TRUE	journal-article		TRUE	publishedVersion	publisher	Yes	kuscholarworks.ku.edu cds.cern.ch eprints.whiterose.ac.uk eprints.soton.ac.uk arXiv.org comum.rcaap.pt	6	TRUE	1029-8479	can	can	green	CC-BY4.0	4	https://doi.org/10.1007/jhep03(2017)032	No			0			0			No	FALSE	FALSE	FALSE	FALSE	FALSE	FALSE	FALSE	FALSE	FALSE	FALSE	FALSE	FALSE
10.1007/JHEP03(2017)061	open (via page says license)	cc-by	diamond	Search for dark matter and unparticles in events with a Z boson and missing transverse momentum in proton-proton collisions at s = 13 $$ \sqrt{s}=13 $$ TeV	Sirunyan, A. M.; Tumasyan, A.; Adam, W.; Asilar, E.; Bergauer, T.; Brandstetter, J.; Brondolin, E.; Dragicevic, M.; Er\\U00F6, J.; Flechl, M.; Friedl, M.; Fr\\U00Fchwirth, R.; Ghete, V. M.; Hartl, C.; H\\U00F6Rmann, N.; Hrubec, J.; Jeitler, M.; K\\U00F6Nig, A.; Kr\\U00E4Tschmer, I.; Liko, D.; Matsushita, T.	2244	Yes	Journal of High Energy Physics	2017	Springer Nature	TRUE	journal-article		TRUE	publishedVersion	publisher	Yes	eprints.whiterose.ac.uk spiral.imperial.ac.uk archive.ugent.be repositorio.unesp.br arXiv.org cds.cern.ch digibuo.uniovi.es comum.rcaap.pt	8	TRUE	1029-8479	can	can	green	CC-BY4.0	12	https://doi.org/10.1007/jhep03(2017)061	No			0			0			No	FALSE	FALSE	FALSE	FALSE	FALSE	FALSE	FALSE	FALSE	FALSE	FALSE	FALSE	FALSE
10.1007/JHEP03(2017)077	open (via page says license)	cc-by	diamond	Search for heavy neutrinos or third-generation leptoquarks in final states with two hadronically decaying Ï„ leptons and two jets in proton-proton collisions at s = 13 $$ \sqrt{s}=13 $$ TeV	Khachatryan, V.; Sirunyan, A. M.; Tumasyan, A.; Adam, W.; Asilar, E.; Bergauer, T.; Brandstetter, J.; Brondolin, E.; Dragicevic, M.; Er\\U00F6, J.; Flechl, M.; Friedl, M.; Fr\\U00Fchwirth, R.; Ghete, V. M.; Hartl, C.; H\\U00F6Rmann, N.; Hrubec, J.; Jeitler, M.; K\\U00F6Nig, A.; Kr\\U00E4Tschmer, I.; Liko, D.	2279	Yes	Journal of High Energy Physics	2017	Springer Nature	TRUE	journal-article		TRUE	publishedVersion	publisher	Yes	cds.cern.ch eprints.whiterose.ac.uk spiral.imperial.ac.uk archive.ugent.be eprints.soton.ac.uk repositorio.unesp.br arXiv.org comum.rcaap.pt	8	TRUE	1029-8479	can	can	green	CC-BY4.0	10	https://doi.org/10.1007/jhep03(2017)077	No			0			0			No	FALSE	FALSE	FALSE	FALSE	FALSE	FALSE	FALSE	FALSE	FALSE	FALSE	FALSE	FALSE
10.1007/JHEP03(2017)101	open (via page says license)	cc-by	diamond	Search for CP violation in t t Â¯ $$ t\overline{t} $$ production and decay in proton-proton collisions at s = 8 $$ \sqrt{s}=8 $$ TeV	Khachatryan, V.; Sirunyan, A. M.; Tumasyan, A.; Adam, W.; Asilar, E.; Bergauer, T.; Brandstetter, J.; Brondolin, E.; Dragicevic, M.; Er\\U00F6, J.; Flechl, M.; Friedl, M.; Fr\\U00Fchwirth, R.; Ghete, V. M.; Hartl, C.; H\\U00F6Rmann, N.; Hrubec, J.; Jeitler, M.; K\\U00F6Nig, A.; Kr\\U00E4Tschmer, I.; Liko, D.	2274	Yes	Journal of High Energy Physics	2017	Springer Nature	TRUE	journal-article		TRUE	publishedVersion	publisher	Yes	kuscholarworks.ku.edu cds.cern.ch digibuo.uniovi.es eprints.whiterose.ac.uk spiral.imperial.ac.uk archive.ugent.be eprints.soton.ac.uk repositorio.unesp.br arXiv.org	9	TRUE	1029-8479	can	can	green	CC-BY4.0	2	https://doi.org/10.1007/jhep03(2017)101	No			0			0			No	FALSE	FALSE	FALSE	FALSE	FALSE	FALSE	FALSE	FALSE	FALSE	FALSE	FALSE	FALSE
10.1007/JHEP03(2017)156	open (via page says license)	cc-by	diamond	Measurement and QCD analysis of double-differential inclusive jet cross sections in pp collisions at s = 8 $$ \sqrt{s}=8 $$ TeV and cross section ratios to 2.76 and 7 TeV	Khachatryan, V.; Sirunyan, A. M.; Tumasyan, A.; Adam, W.; Asilar, E.; Bergauer, T.; Brandstetter, J.; Brondolin, E.; Dragicevic, M.; Er\\U00F6, J.; Flechl, M.; Friedl, M.; Fr\\U00Fchwirth, R.; Ghete, V. M.; Hartl, C.; H\\U00F6Rmann, N.; Hrubec, J.; Jeitler, M.; K\\U00F6Nig, A.; Kr\\U00E4Tschmer, I.; Liko, D.	2257	Yes	Journal of High Energy Physics	2017	Springer Nature	TRUE	journal-article		TRUE	publishedVersion	publisher	Yes	generic.eprints.org archive.ugent.be arXiv.org kuscholarworks.ku.edu cds.cern.ch eprints.whiterose.ac.uk spiral.imperial.ac.uk eprints.soton.ac.uk repositorio.unesp.br	9	TRUE	1029-8479	can	can	green	CC-BY4.0	13	https://doi.org/10.1007/jhep03(2017)156	No			0			0			No	FALSE	FALSE	FALSE	FALSE	FALSE	FALSE	FALSE	FALSE	FALSE	FALSE	FALSE	FALSE
10.1007/JHEP03(2017)162	open (via page says license)	cc-by	diamond	Search for massive resonances decaying into WW, WZ or ZZ bosons in proton-proton collisions at s = 13 $$ \sqrt{s}=13 $$ TeV	Sirunyan, A. M.; Tumasyan, A.; Adam, W.; Asilar, E.; Bergauer, T.; Brandstetter, J.; Brondolin, E.; Dragicevic, M.; Er\\U00F6, J.; Flechl, M.; Friedl, M.; Fr\\U00Fchwirth, R.; Ghete, V. M.; Hartl, C.; H\\U00F6Rmann, N.; Hrubec, J.; Jeitler, M.; K\\U00F6Nig, A.; Kr\\U00E4Tschmer, I.; Liko, D.; Matsushita, T.	2239	Yes	Journal of High Energy Physics	2017	Springer Nature	TRUE	journal-article		TRUE	publishedVersion	publisher	Yes	archive.ugent.be arXiv.org dspace.mit.edu kuscholarworks.ku.edu cds.cern.ch digibuo.uniovi.es eprints.whiterose.ac.uk spiral.imperial.ac.uk comum.rcaap.pt eprints.soton.ac.uk repositorio.unesp.br	11	TRUE	1029-8479	can	can	green	CC-BY4.0	10	https://doi.org/10.1007/jhep03(2017)162	No			0			0			No	FALSE	FALSE	FALSE	FALSE	FALSE	FALSE	FALSE	FALSE	FALSE	FALSE	FALSE	FALSE
10.1007/JHEP04(2017)018	open (via page says license)	cc-by	diamond	Search for electroweak production of charginos in final states with two Ï„ leptons in pp collisions at s = 8 $$ \sqrt{s}=8 $$ TeV	Khachatryan, V.; Sirunyan, A. M.; Tumasyan, A.; Adam, W.; Asilar, E.; Bergauer, T.; Brandstetter, J.; Brondolin, E.; Dragicevic, M.; Er\\U00F6, J.; Flechl, M.; Friedl, M.; Fr\\U00Fchwirth, R.; Ghete, V. M.; Hartl, C.; H\\U00F6Rmann, N.; Hrubec, J.; Jeitler, M.; K\\U00F6Nig, A.; Kr\\U00E4Tschmer, I.; Liko, D.	2261	Yes	Journal of High Energy Physics	2017	Springer Nature	TRUE	journal-article		TRUE	publishedVersion	publisher	Yes	archive.ugent.be arXiv.org kuscholarworks.ku.edu cds.cern.ch digibuo.uniovi.es spiral.imperial.ac.uk eprints.soton.ac.uk repositorio.unesp.br	8	TRUE	1029-8479	can	can	green	CC-BY4.0	4	https://doi.org/10.1007/jhep04(2017)018	No			0			0			No	FALSE	FALSE	FALSE	FALSE	FALSE	FALSE	FALSE	FALSE	FALSE	FALSE	FALSE	FALSE
10.1007/JHEP04(2017)022	open (via page says license)	cc-by	diamond	Measurements of differential production cross sections for a Z boson in association with jets in pp collisions at s = 8 $$ \sqrt{s}=8 $$ TeV	Khachatryan, V.; Sirunyan, A. M.; Tumasyan, A.; Adam, W.; Asilar, E.; Bergauer, T.; Brandstetter, J.; Brondolin, E.; Dragicevic, M.; Er\\U00F6, J.; Flechl, M.; Friedl, M.; Fr\\U00Fchwirth, R.; Ghete, V. M.; Hartl, C.; H\\U00F6Rmann, N.; Hrubec, J.; Jeitler, M.; K\\U00F6Nig, A.; Kr\\U00E4Tschmer, I.; Liko, D.	2264	Yes	Journal of High Energy Physics	2017	Springer Nature	TRUE	journal-article		TRUE	publishedVersion	publisher	Yes	archive.ugent.be arXiv.org kuscholarworks.ku.edu cds.cern.ch eprints.whiterose.ac.uk spiral.imperial.ac.uk comum.rcaap.pt eprints.soton.ac.uk repositorio.unesp.br	9	TRUE	1029-8479	can	can	green	CC-BY4.0	5	https://doi.org/10.1007/jhep04(2017)022	No			0			0			No	FALSE	FALSE	FALSE	FALSE	FALSE	FALSE	FALSE	FALSE	FALSE	FALSE	FALSE	FALSE
10.1007/JHEP04(2017)039	open (via page says license)	cc-by	diamond	Charged-particle nuclear modification factors in PbPb and pPb collisions at s N N = 5.02 $$ \sqrt{s_{\mathrm{N}\;\mathrm{N}}}=5.02 $$ TeV	Khachatryan, V.; Sirunyan, A. M.; Tumasyan, A.; Adam, W.; Asilar, E.; Bergauer, T.; Brandstetter, J.; Brondolin, E.; Dragicevic, M.; Er\\U00F6, J.; Flechl, M.; Friedl, M.; Fr\\U00Fchwirth, R.; Ghete, V. M.; Hartl, C.; H\\U00F6Rmann, N.; Hrubec, J.; Jeitler, M.; K\\U00F6Nig, A.; Kr\\U00E4Tschmer, I.; Liko, D.	2272	Yes	Journal of High Energy Physics	2017	Springer Nature	TRUE	journal-article		TRUE	publishedVersion	publisher	Yes	kuscholarworks.ku.edu cds.cern.ch digibuo.uniovi.es eprints.whiterose.ac.uk spiral.imperial.ac.uk archive.ugent.be eprints.soton.ac.uk repositorio.unesp.br arXiv.org	9	TRUE	1029-8479	can	can	green	CC-BY4.0	24	https://doi.org/10.1007/jhep04(2017)039	No			0			0			No	FALSE	FALSE	FALSE	FALSE	FALSE	FALSE	FALSE	FALSE	FALSE	FALSE	FALSE	FALSE
10.1007/JHEP04(2017)136	open (via page says license)	cc-by	diamond	Search for electroweak production of a vector-like quark decaying to a top quark and a Higgs boson using boosted topologies in fully hadronic final states	Sirunyan, A. M.; Tumasyan, A.; Adam, W.; Asilar, E.; Bergauer, T.; Brandstetter, J.; Brondolin, E.; Dragicevic, M.; Er\\U00F6, J.; Flechl, M.; Friedl, M.; Fr\\U00Fchwirth, R.; Ghete, V. M.; Hartl, C.; H\\U00F6Rmann, N.; Hrubec, J.; Jeitler, M.; K\\U00F6Nig, A.; Kr\\U00E4Tschmer, I.; Liko, D.; Matsushita, T.	2246	Yes	Journal of High Energy Physics	2017	Springer Nature	TRUE	journal-article		TRUE	publishedVersion	publisher	Yes	kuscholarworks.ku.edu cds.cern.ch digibuo.uniovi.es eprints.whiterose.ac.uk spiral.imperial.ac.uk archive.ugent.be eprints.soton.ac.uk repositorio.unesp.br arXiv.org authors.library.caltech.edu comum.rcaap.pt flore.unifi.it	12	TRUE	1029-8479	can	can	green	CC-BY4.0	3	https://doi.org/10.1007/jhep04(2017)136	No			0			0			No	FALSE	FALSE	FALSE	FALSE	FALSE	FALSE	FALSE	FALSE	FALSE	FALSE	FALSE	FALSE
10.1007/JHEP05(2017)013	open (via page says license)	cc-by	diamond	Observation of Y(1S) pair production in proton-proton collisions at s = 8 $$ \sqrt{s}=8 $$ TeV	Khachatryan, V.; Sirunyan, A. M.; Tumasyan, A.; Adam, W.; Asilar, E.; Bergauer, T.; Brandstetter, J.; Brondolin, E.; Dragicevic, M.; Er\\U00F6, J.; Flechl, M.; Friedl, M.; Fr\\U00Fchwirth, R.; Ghete, V. M.; Hartl, C.; H\\U00F6Rmann, N.; Hrubec, J.; Jeitler, M.; K\\U00F6Nig, A.; Kr\\U00E4Tschmer, I.; Liko, D.	2279	Yes	Journal of High Energy Physics	2017	Springer Nature	TRUE	journal-article		TRUE	publishedVersion	publisher	Yes	kuscholarworks.ku.edu cds.cern.ch digibuo.uniovi.es eprints.whiterose.ac.uk spiral.imperial.ac.uk archive.ugent.be repositorio.unesp.br arXiv.org	8	TRUE	1029-8479	can	can	green	CC-BY4.0	6	https://doi.org/10.1007/jhep05(2017)013	No			0			0			No	FALSE	FALSE	FALSE	FALSE	FALSE	FALSE	FALSE	FALSE	FALSE	FALSE	FALSE	FALSE
10.1007/JHEP05(2017)029	open (via page says license)	cc-by	diamond	Search for single production of vector-like quarks decaying to a Z boson and a top or a bottom quark in proton-proton collisions at s = 13 $$ \sqrt{s}=13 $$ TeV	Sirunyan, A. M.; Tumasyan, A.; Adam, W.; Asilar, E.; Bergauer, T.; Brandstetter, J.; Brondolin, E.; Dragicevic, M.; Er\\U00F6, J.; Flechl, M.; Friedl, M.; Fr\\U00Fchwirth, R.; Ghete, V. M.; Hartl, C.; H\\U00F6Rmann, N.; Hrubec, J.; Jeitler, M.; K\\U00F6Nig, A.; Kr\\U00E4Tschmer, I.; Liko, D.; Matsushita, T.	2231	Yes	Journal of High Energy Physics	2017	Springer Nature	TRUE	journal-article		TRUE	publishedVersion	publisher	Yes	kuscholarworks.ku.edu cds.cern.ch digibuo.uniovi.es eprints.whiterose.ac.uk spiral.imperial.ac.uk archive.ugent.be repositorio.unesp.br arXiv.org comum.rcaap.pt	9	TRUE	1029-8479	can	can	green	CC-BY4.0	3	https://doi.org/10.1007/jhep05(2017)029	No			0			0			No	FALSE	FALSE	FALSE	FALSE	FALSE	FALSE	FALSE	FALSE	FALSE	FALSE	FALSE	FALSE
10.1007/JHEP06(2017)106	open (via page says license)	cc-by	diamond	Measurement of electroweak-induced production of WÎ³ with two jets in pp collisions at s = 8 $$ \sqrt{s}=8 $$ TeV and constraints on anomalous quartic gauge couplings	Khachatryan, V.; Sirunyan, A. M.; Tumasyan, A.; Adam, W.; Asilar, E.; Bergauer, T.; Brandstetter, J.; Brondolin, E.; Dragicevic, M.; Er\\U00F6, J.; Flechl, M.; Friedl, M.; Fr\\U00Fchwirth, R.; Ghete, V. M.; Hartl, C.; H\\U00F6Rmann, N.; Hrubec, J.; Jeitler, M.; K\\U00F6Nig, A.; Kr\\U00E4Tschmer, I.; Liko, D.	2266	Yes	Journal of High Energy Physics	2017	Springer Nature	TRUE	journal-article		TRUE	publishedVersion	publisher	Yes	kuscholarworks.ku.edu cds.cern.ch digibuo.uniovi.es eprints.whiterose.ac.uk spiral.imperial.ac.uk archive.ugent.be repositorio.unesp.br arXiv.org comum.rcaap.pt	9	TRUE	1029-8479	can	can	green	CC-BY4.0	2	https://doi.org/10.1007/jhep06(2017)106	No			0			0			No	FALSE	FALSE	FALSE	FALSE	FALSE	FALSE	FALSE	FALSE	FALSE	FALSE	FALSE	FALSE
10.1007/JHEP07(2017)001	open (via page says license)	cc-by	diamond	Search for t t Â¯ $$ \mathrm{t}\overline{\mathrm{t}} $$ resonances in highly boosted lepton+jets and fully hadronic final states in proton-proton collisions at s = 13 $$ \sqrt{s}=13 $$ TeV	Sirunyan, A. M.; Tumasyan, A.; Adam, W.; Asilar, E.; Bergauer, T.; Brandstetter, J.; Brondolin, E.; Dragicevic, M.; Er\\U00F6, J.; Flechl, M.; Friedl, M.; Fr\\U00Fchwirth, R.; Ghete, V. M.; Hartl, C.; H\\U00F6Rmann, N.; Hrubec, J.; Jeitler, M.; K\\U00F6Nig, A.; Kr\\U00E4Tschmer, I.; Liko, D.; Matsushita, T.	2197	Yes	Journal of High Energy Physics	2017	Springer Nature	TRUE	journal-article		TRUE	publishedVersion	publisher	Yes	kuscholarworks.ku.edu cds.cern.ch eprints.iisc.ac.in spiral.imperial.ac.uk archive.ugent.be repositorio.unesp.br arXiv.org digibuo.uniovi.es	8	TRUE	1029-8479	can	can	green	CC-BY4.0	10	https://doi.org/10.1007/jhep07(2017)001	No			0			0			No	FALSE	FALSE	FALSE	FALSE	FALSE	FALSE	FALSE	FALSE	FALSE	FALSE	FALSE	FALSE
10.1007/JHEP07(2017)003	open (via page says license)	cc-by	diamond	Search for associated production of a Z boson with a single top quark and for tZ flavour-changing interactions in pp collisions at s = 8 $$ \sqrt{s}=8 $$ TeV	Sirunyan, A. M.; Tumasyan, A.; Adam, W.; Asilar, E.; Bergauer, T.; Brandstetter, J.; Brondolin, E.; Dragicevic, M.; Er\\U00F6, J.; Flechl, M.; Friedl, M.; Fr\\U00Fchwirth, R.; Ghete, V. M.; Hartl, C.; H\\U00F6Rmann, N.; Hrubec, J.; Jeitler, M.; K\\U00F6Nig, A.; Kr\\U00E4Tschmer, I.; Liko, D.; Matsushita, T.	2233	Yes	Journal of High Energy Physics	2017	Springer Nature	TRUE	journal-article		TRUE	publishedVersion	publisher	Yes	kuscholarworks.ku.edu scholarship.rice.edu cds.cern.ch spiral.imperial.ac.uk archive.ugent.be repositorio.unesp.br arXiv.org digibuo.uniovi.es comum.rcaap.pt	9	TRUE	1029-8479	can	can	green	CC-BY4.0	5	https://doi.org/10.1007/jhep07(2017)003	No			0			0			No	FALSE	FALSE	FALSE	FALSE	FALSE	FALSE	FALSE	FALSE	FALSE	FALSE	FALSE	FALSE
10.1007/JHEP07(2017)013	open (via page says license)	cc-by	diamond	Search for new physics with dijet angular distributions in proton-proton collisions at s = 13 $$ \sqrt{s}=13 $$ TeV	Sirunyan, A. M.; Tumasyan, A.; Adam, W.; Asilar, E.; Bergauer, T.; Brandstetter, J.; Brondolin, E.; Dragicevic, M.; Er\\U00F6, J.; Flechl, M.; Friedl, M.; Fr\\U00Fchwirth, R.; Ghete, V. M.; Hartl, C.; H\\U00F6Rmann, N.; Hrubec, J.; Jeitler, M.; K\\U00F6Nig, A.; Kr\\U00E4Tschmer, I.; Liko, D.; Matsushita, T.	2235	Yes	Journal of High Energy Physics	2017	Springer Nature	TRUE	journal-article		TRUE	publishedVersion	publisher	Yes	kuscholarworks.ku.edu cds.cern.ch digibuo.uniovi.es spiral.imperial.ac.uk archive.ugent.be repositorio.unesp.br arXiv.org comum.rcaap.pt	8	TRUE	1029-8479	can	can	green	CC-BY4.0	4	https://doi.org/10.1007/jhep07(2017)013	No			0			0			No	FALSE	FALSE	FALSE	FALSE	FALSE	FALSE	FALSE	FALSE	FALSE	FALSE	FALSE	FALSE
10.1007/JHEP07(2017)014	open (via page says license)	cc-by	diamond	Search for dark matter produced with an energetic jet or a hadronically decaying W or Z boson at s = 13 $$ \sqrt{s}=13 $$ TeV	Sirunyan, A. M.; Tumasyan, A.; Adam, W.; Asilar, E.; Bergauer, T.; Brandstetter, J.; Brondolin, E.; Dragicevic, M.; Er\\U00F6, J.; Flechl, M.; Friedl, M.; Fr\\U00Fchwirth, R.; Ghete, V. M.; Hartl, C.; H\\U00F6Rmann, N.; Hrubec, J.; Jeitler, M.; K\\U00F6Nig, A.; Kr\\U00E4Tschmer, I.; Liko, D.; Matsushita, T.	2231	Yes	Journal of High Energy Physics	2017	Springer Nature	TRUE	journal-article		TRUE	publishedVersion	publisher	Yes	kuscholarworks.ku.edu digibuo.uniovi.es eprints.iisc.ac.in spiral.imperial.ac.uk archive.ugent.be arXiv.org cds.cern.ch comum.rcaap.pt	8	TRUE	1029-8479	can	can	green	CC-BY4.0	29	https://doi.org/10.1007/jhep07(2017)014	No			0			0			No	FALSE	FALSE	FALSE	FALSE	FALSE	FALSE	FALSE	FALSE	FALSE	FALSE	FALSE	FALSE
10.1007/JHEP07(2017)121	open (via page says license)	cc-by	diamond	Search for third-generation scalar leptoquarks and heavy right-handed neutrinos in final states with two tau leptons and two jets in proton-proton collisions at s = 13 $$ \sqrt{s}=13 $$ TeV	Sirunyan, A. M.; Tumasyan, A.; Adam, W.; Asilar, E.; Bergauer, T.; Brandstetter, J.; Brondolin, E.; Dragicevic, M.; Er\\U00F6, J.; Flechl, M.; Friedl, M.; Fr\\U00Fchwirth, R.; Ghete, V. M.; Hartl, C.; H\\U00F6Rmann, N.; Hrubec, J.; Jeitler, M.; K\\U00F6Nig, A.; Kr\\U00E4Tschmer, I.; Liko, D.; Matsushita, T.	2232	Yes	Journal of High Energy Physics	2017	Springer Nature	TRUE	journal-article		TRUE	publishedVersion	publisher	Yes	kuscholarworks.ku.edu scholarship.rice.edu cds.cern.ch spiral.imperial.ac.uk archive.ugent.be repositorio.unesp.br arXiv.org digibuo.uniovi.es comum.rcaap.pt	9	TRUE	1029-8479	can	can	green	CC-BY4.0	24	https://doi.org/10.1007/jhep07(2017)121	No			0			0			No	FALSE	FALSE	FALSE	FALSE	FALSE	FALSE	FALSE	FALSE	FALSE	FALSE	FALSE	FALSE
10.1007/JHEP08(2017)029	open (via page says license)	cc-by	diamond	Searches for Wâ€² bosons decaying to a top quark and a bottom quark in proton-proton collisions at 13 TeV	Sirunyan, A. M.; Tumasyan, A.; Adam, W.; Ambrogi, F.; Asilar, E.; Bergauer, T.; Brandstetter, J.; Brondolin, E.; Dragicevic, M.; Er\\U00F6, J.; Flechl, M.; Friedl, M.; Fr\\U00Fchwirth, R.; Ghete, V. M.; Grossmann, J.; H\\U00F6Rmann, N.; Hrubec, J.; Jeitler, M.; K\\U00F6Nig, A.; Kr\\U00E4Tschmer, I.; Liko, D.	2205	Yes	Journal of High Energy Physics	2017	Springer Nature	TRUE	journal-article		TRUE	publishedVersion	publisher	Yes	kuscholarworks.ku.edu scholarship.rice.edu authors.library.caltech.edu EVASTAR-Karlsruhe.de cds.cern.ch digibuo.uniovi.es eprints.whiterose.ac.uk spiral.imperial.ac.uk archive.ugent.be repositorio.unesp.br arXiv.org comum.rcaap.pt	12	TRUE	1029-8479	can	can	green	CC-BY4.0	3	https://doi.org/10.1007/jhep08(2017)029	No			0			0			No	FALSE	FALSE	FALSE	FALSE	FALSE	FALSE	FALSE	FALSE	FALSE	FALSE	FALSE	FALSE
10.1007/JHEP08(2017)035	open (via page says license)	cc-by	diamond	Erratum to: search for dark matter in proton-proton collisions at 8 TeV with missing transverse momentum and vector boson tagged jets	Khachatryan, V.; Sirunyan, A. M.; Tumasyan, A.; Adam, W.; Asilar, E.; Bergauer, T.; Brandstetter, J.; Brondolin, E.; Dragicevic, M.; Er\\U00F6, J.; Flechl, M.; Friedl, M.; Fr\\U00Fchwirth, R.; Ghete, V. M.; Hartl, C.; H\\U00F6Rmann, N.; Hrubec, J.; Jeitler, M.; K\\U00F6Nig, A.; Kr\\U00E4Tschmer, I.; Liko, D.	2267	Yes	Journal of High Energy Physics	2017	Springer Nature	TRUE	journal-article		TRUE	publishedVersion	publisher	Yes	cds.cern.ch digibuo.uniovi.es spiral.imperial.ac.uk archive.ugent.be repositorio.unesp.br bib-pubdb1.desy.de	6	TRUE	1029-8479	can	can	green	CC-BY4.0	1	https://doi.org/10.1007/jhep08(2017)035	No			0			0			No	FALSE	FALSE	FALSE	FALSE	FALSE	FALSE	FALSE	FALSE	FALSE	FALSE	FALSE	FALSE
10.1007/JHEP08(2017)046	open (via page says license)	cc-by	diamond	Measurement of the inclusive energy spectrum in the very forward direction in proton-proton collisions at s = 13 $$ \sqrt{s}=13 $$ TeV	Sirunyan, A. M.; Tumasyan, A.; Adam, W.; Asilar, E.; Bergauer, T.; Brandstetter, J.; Brondolin, E.; Dragicevic, M.; Er\\U00F6, J.; Flechl, M.; Friedl, M.; Fr\\U00Fchwirth, R.; Ghete, V. M.; Hartl, C.; H\\U00F6Rmann, N.; Hrubec, J.; Jeitler, M.; K\\U00F6Nig, A.; Kr\\U00E4Tschmer, I.; Liko, D.; Matsushita, T.	2234	Yes	Journal of High Energy Physics	2017	Springer Nature	TRUE	journal-article		TRUE	publishedVersion	publisher	Yes	kuscholarworks.ku.edu scholarship.rice.edu cds.cern.ch spiral.imperial.ac.uk archive.ugent.be repositorio.unesp.br arXiv.org digibuo.uniovi.es comum.rcaap.pt	9	TRUE	1029-8479	can	can	green	CC-BY4.0	0	https://doi.org/10.1007/jhep08(2017)046	No			0			0			No	FALSE	FALSE	FALSE	FALSE	FALSE	FALSE	FALSE	FALSE	FALSE	FALSE	FALSE	FALSE
10.1007/JHEP08(2017)073	open (via page says license)	cc-by	diamond	Search for top quark partners with charge 5/3 in proton-proton collisions at s = 13 $$ \sqrt{s}=13 $$ TeV	Sirunyan, A. M.; Tumasyan, A.; Adam, W.; Asilar, E.; Bergauer, T.; Brandstetter, J.; Brondolin, E.; Dragicevic, M.; Er\\U00F6, J.; Flechl, M.; Friedl, M.; Fr\\U00Fchwirth, R.; Ghete, V. M.; Hartl, C.; H\\U00F6Rmann, N.; Hrubec, J.; Jeitler, M.; K\\U00F6Nig, A.; Kr\\U00E4Tschmer, I.; Liko, D.; Matsushita, T.	2192	Yes	Journal of High Energy Physics	2017	Springer Nature	TRUE	journal-article		TRUE	publishedVersion	publisher	Yes	kuscholarworks.ku.edu scholarship.rice.edu cds.cern.ch eprints.whiterose.ac.uk spiral.imperial.ac.uk archive.ugent.be arXiv.org comum.rcaap.pt	8	TRUE	1029-8479	can	can	green	CC-BY4.0	3	https://doi.org/10.1007/jhep08(2017)073	No			0			0			No	FALSE	FALSE	FALSE	FALSE	FALSE	FALSE	FALSE	FALSE	FALSE	FALSE	FALSE	FALSE
10.1007/JHEP09(2017)051	open (via page says license)	cc-by	diamond	Measurement of the t t Â¯ $$ \mathrm{t}\overline{\mathrm{t}} $$ production cross section using events with one lepton and at least one jet in pp collisions at s = 13 $$ \sqrt{s}=13 $$ TeV	Sirunyan, A. M.; Tumasyan, A.; Adam, W.; Asilar, E.; Bergauer, T.; Brandstetter, J.; Brondolin, E.; Dragicevic, M.; Er\\U00F6, J.; Flechl, M.; Friedl, M.; Fr\\U00Fchwirth, R.; Ghete, V. M.; Hartl, C.; H\\U00F6Rmann, N.; Hrubec, J.; Jeitler, M.; K\\U00F6Nig, A.; Kr\\U00E4Tschmer, I.; Liko, D.; Matsushita, T.	2245	Yes	Journal of High Energy Physics	2017	Springer Nature	TRUE	journal-article		TRUE	publishedVersion	publisher	Yes	kuscholarworks.ku.edu eprints.whiterose.ac.uk spiral.imperial.ac.uk archive.ugent.be arXiv.org cds.cern.ch digibuo.uniovi.es comum.rcaap.pt	8	TRUE	1029-8479	can	can	green	CC-BY4.0	7	https://doi.org/10.1007/jhep09(2017)051	No			0			0			No	FALSE	FALSE	FALSE	FALSE	FALSE	FALSE	FALSE	FALSE	FALSE	FALSE	FALSE	FALSE
10.1007/JHEP09(2017)053	open (via page says license)	cc-by	diamond	Search for a heavy resonance decaying to a top quark and a vector-like top quark at s = 13 $$ \sqrt{s}=13 $$ TeV	Sirunyan, A. M.; Tumasyan, A.; Adam, W.; Asilar, E.; Bergauer, T.; Brandstetter, J.; Brondolin, E.; Dragicevic, M.; Er\\U00F6, J.; Flechl, M.; Friedl, M.; Fr\\U00Fchwirth, R.; Ghete, V. M.; Hartl, C.; H\\U00F6Rmann, N.; Hrubec, J.; Jeitler, M.; K\\U00F6Nig, A.; Kr\\U00E4Tschmer, I.; Liko, D.; Matsushita, T.	2230	Yes	Journal of High Energy Physics	2017	Springer Nature	TRUE	journal-article		TRUE	publishedVersion	publisher	Yes	kuscholarworks.ku.edu cds.cern.ch eprints.whiterose.ac.uk spiral.imperial.ac.uk archive.ugent.be repositorio.unesp.br arXiv.org digibuo.uniovi.es comum.rcaap.pt	9	TRUE	1029-8479	can	can	green	CC-BY4.0	2	https://doi.org/10.1007/jhep09(2017)053	No			0			0			No	FALSE	FALSE	FALSE	FALSE	FALSE	FALSE	FALSE	FALSE	FALSE	FALSE	FALSE	FALSE
10.1007/JHEP09(2017)106	open (via page says license)	cc-by	diamond	Erratum to: Search for dark matter and unparticles in events with a Z boson and missing transverse momentum in proton-proton collisions at s = 13 $$ \sqrt{s}=13 $$ TeV	Sirunyan, A. M.; Tumasyan, A.; Adam, W.; Asilar, E.; Bergauer, T.; Brandstetter, J.; Brondolin, E.; Dragicevic, M.; Er\\U00F6, J.; Flechl, M.; Friedl, M.; Fr\\U00Fchwirth, R.; Ghete, V. M.; Hartl, C.; H\\U00F6Rmann, N.; Hrubec, J.; Jeitler, M.; K\\U00F6Nig, A.; Kr\\U00E4Tschmer, I.; Liko, D.; Matsushita, T.	2244	Yes	Journal of High Energy Physics	2017	Springer Nature	TRUE	journal-article		TRUE	publishedVersion	publisher	Yes	digibuo.uniovi.es spiral.imperial.ac.uk repositorio.unesp.br archive.ugent.be	4	TRUE	1029-8479	can	can	green	CC-BY4.0	1	https://doi.org/10.1007/jhep09(2017)106	No			0			0			No	FALSE	FALSE	FALSE	FALSE	FALSE	FALSE	FALSE	FALSE	FALSE	FALSE	FALSE	FALSE
10.1007/JHEP10(2017)005	open (via page says license)	cc-by	diamond	Search for direct production of supersymmetric partners of the top quark in the all-jets final state in proton-proton collisions at s = 13 $$ \sqrt{s}=13 $$ TeV	Sirunyan, A. M.; Tumasyan, A.; Adam, W.; Ambrogi, F.; Asilar, E.; Bergauer, T.; Brandstetter, J.; Brondolin, E.; Dragicevic, M.; Er\\U00F6, J.; Flechl, M.; Friedl, M.; Fr\\U00Fchwirth, R.; Ghete, V. M.; Grossmann, J.; Hrubec, J.; Jeitler, M.; K\\U00F6Nig, A.; Krammer, N.; Kr\\U00E4Tschmer, I.; Liko, D.	2233	Yes	Journal of High Energy Physics	2017	Springer Nature	TRUE	journal-article		TRUE	publishedVersion	publisher	Yes	archive.ugent.be arXiv.org kuscholarworks.ku.edu scholarship.rice.edu cds.cern.ch digibuo.uniovi.es eprints.iisc.ac.in eprints.whiterose.ac.uk spiral.imperial.ac.uk comum.rcaap.pt repositorio.unesp.br	11	TRUE	1029-8479	can	can	green	CC-BY4.0	9	https://doi.org/10.1007/jhep10(2017)005	No			0			0			No	FALSE	FALSE	FALSE	FALSE	FALSE	FALSE	FALSE	FALSE	FALSE	FALSE	FALSE	FALSE
10.1007/JHEP10(2017)006	open (via page says license)	cc-by	diamond	Measurement of the semileptonic t t Â¯ $$ \mathrm{t}\overline{\mathrm{t}} $$ + Î³ production cross section in pp collisions at s = 8 $$ \sqrt{s}=8 $$ TeV	Sirunyan, A. M.; Tumasyan, A.; Adam, W.; Asilar, E.; Bergauer, T.; Brandstetter, J.; Brondolin, E.; Dragicevic, M.; Er\\U00F6, J.; Flechl, M.; Friedl, M.; Fr\\U00Fchwirth, R.; Ghete, V. M.; Hartl, C.; H\\U00F6Rmann, N.; Hrubec, J.; Jeitler, M.; K\\U00F6Nig, A.; Kr\\U00E4Tschmer, I.; Liko, D.; Matsushita, T.	2230	Yes	Journal of High Energy Physics	2017	Springer Nature	TRUE	journal-article		TRUE	publishedVersion	publisher	Yes	kuscholarworks.ku.edu scholarship.rice.edu cds.cern.ch eprints.whiterose.ac.uk spiral.imperial.ac.uk archive.ugent.be repositorio.unesp.br arXiv.org digibuo.uniovi.es	9	TRUE	1029-8479	can	can	green	CC-BY4.0	3	https://doi.org/10.1007/jhep10(2017)006	No			0			0			No	FALSE	FALSE	FALSE	FALSE	FALSE	FALSE	FALSE	FALSE	FALSE	FALSE	FALSE	FALSE
10.1007/JHEP10(2017)019	open (via page says license)	cc-by	diamond	Search for top squark pair production in pp collisions at s = 13 $$ \sqrt{s}=13 $$ TeV using single lepton events	Sirunyan, A. M.; Tumasyan, A.; Adam, W.; Ambrogi, F.; Asilar, E.; Bergauer, T.; Brandstetter, J.; Brondolin, E.; Dragicevic, M.; Er\\U00F6, J.; Flechl, M.; Friedl, M.; Fr\\U00Fchwirth, R.; Ghete, V. M.; Grossmann, J.; Hrubec, J.; Jeitler, M.; K\\U00F6Nig, A.; Krammer, N.; Kr\\U00E4Tschmer, I.; Liko, D.	2232	Yes	Journal of High Energy Physics	2017	Springer Nature	TRUE	journal-article		TRUE	publishedVersion	publisher	Yes	kuscholarworks.ku.edu scholarship.rice.edu cds.cern.ch eprints.iisc.ac.in eprints.whiterose.ac.uk spiral.imperial.ac.uk archive.ugent.be arXiv.org	8	TRUE	1029-8479	can	can	green	CC-BY4.0	16	https://doi.org/10.1007/jhep10(2017)019	No			0			0			No	FALSE	FALSE	FALSE	FALSE	FALSE	FALSE	FALSE	FALSE	FALSE	FALSE	FALSE	FALSE
10.1007/JHEP10(2017)072	open (via page says license)	cc-by	diamond	Measurements of the pp â†’ WÎ³Î³ and pp â†’ ZÎ³Î³ cross sections and limits on anomalous quartic gauge couplings at s = 8 $$ \sqrt{s}=8 $$ TeV	Sirunyan, A. M.; Tumasyan, A.; Adam, W.; Asilar, E.; Bergauer, T.; Brandstetter, J.; Brondolin, E.; Dragicevic, M.; Er\\U00F6, J.; Flechl, M.; Friedl, M.; Fr\\U00Fchwirth, R.; Ghete, V. M.; Hartl, C.; H\\U00F6Rmann, N.; Hrubec, J.; Jeitler, M.; K\\U00F6Nig, A.; Kr\\U00E4Tschmer, I.; Liko, D.; Matsushita, T.	2228	Yes	Journal of High Energy Physics	2017	Springer Nature	TRUE	journal-article		TRUE	publishedVersion	publisher	Yes	kuscholarworks.ku.edu scholarship.rice.edu cds.cern.ch spiral.imperial.ac.uk archive.ugent.be repositorio.unesp.br arXiv.org	7	TRUE	1029-8479	can	can	green	CC-BY4.0	0	https://doi.org/10.1007/jhep10(2017)072	No			0			0			No	FALSE	FALSE	FALSE	FALSE	FALSE	FALSE	FALSE	FALSE	FALSE	FALSE	FALSE	FALSE
10.1007/JHEP10(2017)073	open (via page says license)	cc-by	diamond	Search for new physics in the monophoton final state in proton-proton collisions at s = 13 $$ \sqrt{s}=13 $$ TeV	Sirunyan, A. M.; Tumasyan, A.; Adam, W.; Asilar, E.; Bergauer, T.; Brandstetter, J.; Brondolin, E.; Dragicevic, M.; Er\\U00F6, J.; Flechl, M.; Friedl, M.; Fr\\U00Fchwirth, R.; Ghete, V. M.; Hartl, C.; H\\U00F6Rmann, N.; Hrubec, J.; Jeitler, M.; K\\U00F6Nig, A.; Kr\\U00E4Tschmer, I.; Liko, D.; Matsushita, T.	2206	Yes	Journal of High Energy Physics	2017	Springer Nature	TRUE	journal-article		TRUE	publishedVersion	publisher	Yes	kuscholarworks.ku.edu scholarship.rice.edu cds.cern.ch spiral.imperial.ac.uk archive.ugent.be repositorio.unesp.br arXiv.org digibuo.uniovi.es comum.rcaap.pt	9	TRUE	1029-8479	can	can	green	CC-BY4.0	6	https://doi.org/10.1007/jhep10(2017)073	No			0			0			No	FALSE	FALSE	FALSE	FALSE	FALSE	FALSE	FALSE	FALSE	FALSE	FALSE	FALSE	FALSE
10.1007/JHEP10(2017)076	open (via page says license)	cc-by	diamond	Search for light bosons in decays of the 125 GeV Higgs boson in proton-proton collisions at s = 8 $$ \sqrt{s}=8 $$ TeV	Khachatryan, V.; Sirunyan, A. M.; Tumasyan, A.; Adam, W.; Asilar, E.; Bergauer, T.; Brandstetter, J.; Brondolin, E.; Dragicevic, M.; Er\\U00F6, J.; Flechl, M.; Friedl, M.; Fr\\U00Fchwirth, R.; Ghete, V. M.; Hartl, C.; H\\U00F6Rmann, N.; Hrubec, J.; Jeitler, M.; K\\U00F6Nig, A.; Kr\\U00E4Tschmer, I.; Liko, D.	2270	Yes	Journal of High Energy Physics	2017	Springer Nature	TRUE	journal-article		TRUE	publishedVersion	publisher	Yes	archive.ugent.be arXiv.org kuscholarworks.ku.edu scholarship.rice.edu bura.brunel.ac.uk cds.cern.ch spiral.imperial.ac.uk comum.rcaap.pt repositorio.unesp.br	9	TRUE	1029-8479	can	can	green	CC-BY4.0	6	https://doi.org/10.1007/jhep10(2017)076	No			0			0			No	FALSE	FALSE	FALSE	FALSE	FALSE	FALSE	FALSE	FALSE	FALSE	FALSE	FALSE	FALSE
10.1007/JHEP10(2017)131	open (via page says license)	cc-by	diamond	Measurements of jet charge with dijet events in pp collisions at s = 8 $$ \sqrt{s}=8 $$ TeV	Sirunyan, A. M.; Tumasyan, A.; Adam, W.; Asilar, E.; Bergauer, T.; Brandstetter, J.; Brondolin, E.; Dragicevic, M.; Er\\U00F6, J.; Flechl, M.; Friedl, M.; Fr\\U00Fchwirth, R.; Ghete, V. M.; Hartl, C.; H\\U00F6Rmann, N.; Hrubec, J.; Jeitler, M.; K\\U00F6Nig, A.; Kr\\U00E4Tschmer, I.; Liko, D.; Matsushita, T.	2228	Yes	Journal of High Energy Physics	2017	Springer Nature	TRUE	journal-article		TRUE	publishedVersion	publisher	Yes	kuscholarworks.ku.edu scholarship.rice.edu cds.cern.ch digibuo.uniovi.es spiral.imperial.ac.uk archive.ugent.be repositorio.unesp.br arXiv.org comum.rcaap.pt	9	TRUE	1029-8479	can	can	green	CC-BY4.0	2	https://doi.org/10.1007/jhep10(2017)131	No			0			0			No	FALSE	FALSE	FALSE	FALSE	FALSE	FALSE	FALSE	FALSE	FALSE	FALSE	FALSE	FALSE
10.1007/JHEP10(2017)180	open (via page says license)	cc-by	diamond	Search for associated production of dark matter with a Higgs boson decaying to b b Â¯ $$ \mathrm{b}\overline{\mathrm{b}} $$ or Î³Î³ at s = 13 $$ \sqrt{s}=13 $$ TeV	Sirunyan, A. M.; Tumasyan, A.; Adam, W.; Asilar, E.; Bergauer, T.; Brandstetter, J.; Brondolin, E.; Dragicevic, M.; Er\\U00F6, J.; Flechl, M.; Friedl, M.; Fr\\U00Fchwirth, R.; Ghete, V. M.; Hartl, C.; H\\U00F6Rmann, N.; Hrubec, J.; Jeitler, M.; K\\U00F6Nig, A.; Kr\\U00E4Tschmer, I.; Liko, D.; Matsushita, T.	2233	Yes	Journal of High Energy Physics	2017	Springer Nature	TRUE	journal-article		TRUE	publishedVersion	publisher	Yes	kuscholarworks.ku.edu cds.cern.ch spiral.imperial.ac.uk archive.ugent.be repositorio.unesp.br arXiv.org digibuo.uniovi.es	7	TRUE	1029-8479	can	can	green	CC-BY4.0	4	https://doi.org/10.1007/jhep10(2017)180	No			0			0			No	FALSE	FALSE	FALSE	FALSE	FALSE	FALSE	FALSE	FALSE	FALSE	FALSE	FALSE	FALSE
10.1007/JHEP11(2017)010	open (via page says license)	cc-by	diamond	Search for a light pseudoscalar Higgs boson produced in association with bottom quarks in pp collisions at s = 8 $$ \sqrt{s}=8 $$ TeV	Sirunyan, A. M.; Tumasyan, A.; Adam, W.; Ambrogi, F.; Asilar, E.; Bergauer, T.; Brandstetter, J.; Brondolin, E.; Dragicevic, M.; Er\\U00F6, J.; Flechl, M.; Friedl, M.; Fr\\U00Fchwirth, R.; Ghete, V. M.; Grossmann, J.; Hrubec, J.; Jeitler, M.; K\\U00F6Nig, A.; Krammer, N.; Kr\\U00E4Tschmer, I.; Liko, D.	2235	Yes	Journal of High Energy Physics	2017	Springer Nature	TRUE	journal-article		TRUE	publishedVersion	publisher	Yes	kuscholarworks.ku.edu scholarship.rice.edu cds.cern.ch eprints.iisc.ac.in spiral.imperial.ac.uk archive.ugent.be repositorio.unesp.br arXiv.org digibuo.uniovi.es comum.rcaap.pt	10	TRUE	1029-8479	can	can	green	CC-BY4.0	2	https://doi.org/10.1007/jhep11(2017)010	No			0			0			No	FALSE	FALSE	FALSE	FALSE	FALSE	FALSE	FALSE	FALSE	FALSE	FALSE	FALSE	FALSE
10.1007/JHEP11(2017)029	open (via page says license)	cc-by	diamond	Search for electroweak production of charginos and neutralinos in WH events in proton-proton collisions at s = 13 $$ \sqrt{s}=13 $$ TeV	Sirunyan, A. M.; Tumasyan, A.; Adam, W.; Ambrogi, F.; Asilar, E.; Bergauer, T.; Brandstetter, J.; Brondolin, E.; Dragicevic, M.; Er\\U00F6, J.; Flechl, M.; Friedl, M.; Fr\\U00Fchwirth, R.; Ghete, V. M.; Grossmann, J.; Hrubec, J.; Jeitler, M.; K\\U00F6Nig, A.; Krammer, N.; Kr\\U00E4Tschmer, I.; Liko, D.	2232	Yes	Journal of High Energy Physics	2017	Springer Nature	TRUE	journal-article		TRUE	publishedVersion	publisher	Yes	kuscholarworks.ku.edu scholarship.rice.edu cds.cern.ch digibuo.uniovi.es eprints.whiterose.ac.uk spiral.imperial.ac.uk archive.ugent.be repositorio.unesp.br arXiv.org comum.rcaap.pt	10	TRUE	1029-8479	can	can	green	CC-BY4.0	6	https://doi.org/10.1007/jhep11(2017)029	No			0			0			No	FALSE	FALSE	FALSE	FALSE	FALSE	FALSE	FALSE	FALSE	FALSE	FALSE	FALSE	FALSE
10.1007/JHEP11(2017)047	open (via page says license)	cc-by	diamond	Measurements of properties of the Higgs boson decaying into the four-lepton final state in pp collisions at s = 13 $$ \sqrt{s}=13 $$ TeV	Sirunyan, A. M.; Tumasyan, A.; Adam, W.; Ambrogi, F.; Asilar, E.; Bergauer, T.; Brandstetter, J.; Brondolin, E.; Dragicevic, M.; Er\\U00F6, J.; Flechl, M.; Friedl, M.; Fr\\U00Fchwirth, R.; Ghete, V. M.; Grossmann, J.; Hrubec, J.; Jeitler, M.; K\\U00F6Nig, A.; Krammer, N.; Kr\\U00E4Tschmer, I.; Liko, D.	2240	Yes	Journal of High Energy Physics	2017	Springer Nature	TRUE	journal-article		TRUE	publishedVersion	publisher	Yes	archive.ugent.be arXiv.org kuscholarworks.ku.edu scholarship.rice.edu cds.cern.ch digibuo.uniovi.es eprints.whiterose.ac.uk spiral.imperial.ac.uk comum.rcaap.pt repositorio.unesp.br	10	TRUE	1029-8479	can	can	green	CC-BY4.0	30	https://doi.org/10.1007/jhep11(2017)047	No			0			0			No	FALSE	FALSE	FALSE	FALSE	FALSE	FALSE	FALSE	FALSE	FALSE	FALSE	FALSE	FALSE
10.1007/JHEP11(2017)085	open (via page says license)	cc-by	diamond	Search for pair production of vector-like T and B quarks in single-lepton final states using boosted jet substructure in proton-proton collisions at s = 13 $$ \sqrt{s}=13 $$ TeV	Sirunyan, A. M.; Tumasyan, A.; Adam, W.; Ambrogi, F.; Asilar, E.; Bergauer, T.; Brandstetter, J.; Brondolin, E.; Dragicevic, M.; Er\\U00F6, J.; Flechl, M.; Friedl, M.; Fr\\U00Fchwirth, R.; Ghete, V. M.; Grossmann, J.; Hrubec, J.; Jeitler, M.; K\\U00F6Nig, A.; Krammer, N.; Kr\\U00E4Tschmer, I.; Liko, D.	2226	Yes	Journal of High Energy Physics	2017	Springer Nature	TRUE	journal-article		TRUE	publishedVersion	publisher	Yes	kuscholarworks.ku.edu scholarship.rice.edu cds.cern.ch eprints.iisc.ac.in eprints.whiterose.ac.uk spiral.imperial.ac.uk archive.ugent.be repositorio.unesp.br arXiv.org bura.brunel.ac.uk digibuo.uniovi.es comum.rcaap.pt	12	TRUE	1029-8479	can	can	green	CC-BY4.0	10	https://doi.org/10.1007/jhep11(2017)085	No			0			0			No	FALSE	FALSE	FALSE	FALSE	FALSE	FALSE	FALSE	FALSE	FALSE	FALSE	FALSE	FALSE
10.1007/JHEP12(2017)142	open (via page says license)	cc-by	diamond	Search for supersymmetry in events with at least one photon, missing transverse momentum, and large transverse event activity in proton-proton collisions at s = 13 $$ \sqrt{s}=13 $$ TeV	Sirunyan, A. M.; Tumasyan, A.; Adam, W.; Ambrogi, F.; Asilar, E.; Bergauer, T.; Brandstetter, J.; Brondolin, E.; Dragicevic, M.; Er\\U00F6, J.; Flechl, M.; Friedl, M.; Fr\\U00Fchwirth, R.; Ghete, V. M.; Grossmann, J.; Hrubec, J.; Jeitler, M.; K\\U00F6Nig, A.; Krammer, N.; Kr\\U00E4Tschmer, I.; Liko, D.	2231	Yes	Journal of High Energy Physics	2017	Springer Nature	TRUE	journal-article		TRUE	publishedVersion	publisher	Yes	kuscholarworks.ku.edu scholarship.rice.edu cds.cern.ch digibuo.uniovi.es spiral.imperial.ac.uk archive.ugent.be repositorio.unesp.br arXiv.org comum.rcaap.pt	9	TRUE	1029-8479	can	can	green	CC-BY4.0	8	https://doi.org/10.1007/jhep12(2017)142	No			0			0			No	FALSE	FALSE	FALSE	FALSE	FALSE	FALSE	FALSE	FALSE	FALSE	FALSE	FALSE	FALSE
10.1007/s00018-017-2481-5			closed	Considerations on mTOR regulation at serine 2448: implications for muscle metabolism studies	Figueiredo, Vandr\\U00E9 Casagrande; Markworth, James F.; Cameron-Smith, David	3	No	Cellular and Molecular Life Sciences	2017	Springer Nature	FALSE	journal-article		FALSE			No		0	FALSE	1420-9071	12 months embargo	cannot	green		10						USD	3000	3000		Biochemistry & Molecular Biology; Cell Biology	Yes	FALSE	FALSE	FALSE	FALSE	FALSE	FALSE	FALSE	FALSE	FALSE	FALSE	FALSE	FALSE
10.1007/s00018-017-2558-1			closed	Conditionally disordered proteins: bringing the environment back into the fold	Hausrath, Andrew C.; Kingston, Richard L.	2	No	Cellular and Molecular Life Sciences	2017	Springer Nature	FALSE	journal-article		FALSE			No		0	FALSE	1420-9071	12 months embargo	cannot	green		5						USD	3000	3000		Biochemistry & Molecular Biology; Cell Biology	Yes	FALSE	FALSE	FALSE	FALSE	FALSE	FALSE	FALSE	FALSE	FALSE	FALSE	FALSE	FALSE
10.1007/s00020-017-2353-2			closed	Ultracontractivity and Eigenvalues: Weylâ€™s Law for the Dirichlet-to-Neumann Operator	Arendt, W.; Ter Elst, A. F. M.	2	No	Integral Equations and Operator Theory	2017	Springer Nature	FALSE	journal-article		FALSE			No		0	FALSE	1420-8989	12 months embargo	cannot	green		2						USD	3000	3000	NZ-EU IRSES; Marsden Fund Council from Government; EU [318910]	Mathematics	Yes	FALSE	FALSE	FALSE	TRUE	TRUE	FALSE	FALSE	TRUE	FALSE	FALSE	FALSE	FALSE
10.1007/s00024-017-1534-x			closed	Effects of Inundation by the 14th November, 2016 KaikÅura Tsunami on Banks Peninsula, Canterbury, New Zealand	Lane, Emily M.; Borrero, Jose; Whittaker, Colin N.; Bind, Jo; Chagu\\U00E9-Goff, Catherine; Goff, James; Goring, Derek; Hoyle, Jo; Mueller, Christof; Power, William L.; Reid, Catherine M.; Williams, James H.; Williams, Shaun P.	13	No	Pure and Applied Geophysics	2017	Springer Nature	FALSE	journal-article		FALSE			No		0	FALSE	1420-9136	12 months embargo	cannot	green		7						USD	3000	3000	NIWA Taihoro Nukurangi; Natural Hazards Research Platform; GNS Science government core funding	Geochemistry & Geophysics	No	FALSE	FALSE	FALSE	FALSE	FALSE	FALSE	FALSE	FALSE	FALSE	FALSE	FALSE	FALSE
10.1007/s00024-017-1566-2			closed	Tsunami runup and tide-gauge observations from the 14 November 2016 M7.8 KaikÅura earthquake, New Zealand	Power, William; Clark, Kate; King, Darren N.; Borrero, Jose; Howarth, Jamie; Lane, Emily M.; Goring, Derek; Goff, James; Chagu\\U00E9-Goff, Catherine; Williams, James; Reid, Catherine; Whittaker, Colin; Mueller, Christof; Williams, Shaun; Hughes, Matthew W.; Hoyle, Jo; Bind, Jochen; Strong, Delia; Litchfield, Nicola; Benson, Adrian	20	No	Pure and Applied Geophysics	2017	Springer Nature	FALSE	journal-article		FALSE			No		0	FALSE	1420-9136	12 months embargo	cannot	green		18						USD	3000	3000		Geochemistry & Geophysics	No	FALSE	FALSE	FALSE	FALSE	FALSE	FALSE	FALSE	FALSE	FALSE	FALSE	FALSE	FALSE
10.1007/s00038-017-0983-4	oa repository (via OAI-PMH title and first author match)		green	Food swamps by area socioeconomic deprivation in New Zealand: a national study	Sushil, Zaynel; Vandevijvere, Stefanie; Exeter, Daniel J.; Swinburn, Boyd	4	No	International Journal of Public Health	2017	Springer Nature	TRUE	journal-article		FALSE	null	repository	Yes	RePEc	1	FALSE	1661-8564	12 months embargo	cannot	green		5	http://link.springer.com/10.1007/s00038-017-0983-4					USD	3000	3000	Health Research Council of New Zealand	Public, Environmental & Occupational Health	Yes	FALSE	TRUE	FALSE	FALSE	FALSE	FALSE	FALSE	TRUE	FALSE	FALSE	FALSE	FALSE
10.1007/s00125-017-4441-x	open (via free pdf)		bronze	Gestational retinal microvasculature and the risk of 5Â year postpartum abnormal glucose metabolism	Li, Ling-Jun; Tan, Kok Hian; Aris, Izzuddin M.; Chong, Yap Seng; Saw, Seang Mei; Gluckman, Peter; Wang, Jie Jin; Wong, Tien Yin	8	No	Diabetologia	2017	Springer Nature	TRUE	journal-article		FALSE	publishedVersion	publisher	No		0	FALSE	1432-0428	12 months embargo	cannot	green		1	https://link.springer.com/content/pdf/10.1007%2Fs00125-017-4441-x.pdf					USD	3000	3000	Singapore National Medical Council [NMRC/CNIG/1114/2013]; Singapore National Medical Council Transition Award [NMRC/TA/0027/2014]; Singapore National Research Foundation (NRF)	Endocrinology & Metabolism	No	FALSE	FALSE	FALSE	FALSE	FALSE	FALSE	FALSE	FALSE	FALSE	FALSE	FALSE	FALSE
10.1007/s00126-016-0658-8			closed	The Kohuamuri siliceous sinter as a vector for epithermal mineralisation, Coromandel Volcanic Zone, New Zealand	Hamilton, Ayrton; Campbell, Kathleen; Rowland, Julie; Browne, Patrick	4	No	Mineralium Deposita	2017	Springer Nature	FALSE	journal-article		FALSE			No		0	FALSE	1432-1866	12 months embargo	cannot	green		3						USD	3000	3000	Institute of Mining and Metallurgy New Zealand Branch-Education Endowment Trust Scholarship; Newmont Waihi Gold; University of Auckland Geology Centennial Award; Royal Society of New Zealand's Marsden Fund; Ministry for Business Innovation and Employment (MBIE)	Geochemistry & Geophysics; Mineralogy	Yes	FALSE	FALSE	FALSE	TRUE	TRUE	TRUE	FALSE	TRUE	FALSE	FALSE	FALSE	FALSE
10.1007/s00163-016-0226-3			closed	Perspectives on iteration in design and development	Wynn, David C.; Eckert, Claudia M.	2	No	Research in Engineering Design	2017	Springer Nature	FALSE	journal-article		FALSE			No		0	FALSE	1435-6066	12 months embargo	cannot	green		19						USD	3000	3000		Engineering	Yes	FALSE	FALSE	FALSE	FALSE	FALSE	FALSE	FALSE	FALSE	FALSE	FALSE	FALSE	FALSE
10.1007/s00170-017-0300-7			closed	Machine Tool 4.0 for the new era of manufacturing	Xu, Xun	1	No	The International Journal of Advanced Manufacturing Technology	2017	Springer Nature	FALSE	journal-article		FALSE			No		0	FALSE	1433-3015	12 months embargo	cannot	green		20						USD	3000	3000		Automation & Control Systems; Engineering	Yes	FALSE	FALSE	FALSE	FALSE	FALSE	FALSE	FALSE	FALSE	FALSE	FALSE	FALSE	FALSE
10.1007/s00170-017-0593-6			closed	A new high-performance open CNC system and its energy-aware scheduling algorithm	Deng, Chang-Yi; Guo, Rui-Feng; Xu, Xun; Zhong, Ray Y; Yin, Zhenyu	5	No	The International Journal of Advanced Manufacturing Technology	2017	Springer Nature	FALSE	journal-article		FALSE			No		0	FALSE	1433-3015	12 months embargo	cannot	green		2						USD	3000	3000	National Science and Technology Major Project of the Ministry of Science and Technology of China [2014ZX04014-021]; China Scholarship Council; University of Auckland	Automation & Control Systems; Engineering	Yes	FALSE	FALSE	FALSE	FALSE	FALSE	FALSE	FALSE	FALSE	FALSE	FALSE	FALSE	FALSE
10.1007/s00198-016-3744-y			closed	Acute effects of calcium supplements on blood pressure: randomised, crossover trial in postmenopausal women	Billington, E. O.; Bristow, S. M.; Gamble, G. D.; De Kwant, J. A.; Stewart, A.; Mihov, B. V.; Horne, A. M.; Reid, I. R.	8	No	Osteoporosis International	2017	Springer Nature	FALSE	journal-article		FALSE			No		0	FALSE	1433-2965	12 months embargo	cannot	green		1						USD	3000	3000	Health Research Council of New Zealand; University of Auckland; University of Calgary; Auckland Medical Research Foundation Edith C. Coan Research Fellowship; Kelliher Charitable Trust Emerging Research Start-Up Award	Endocrinology & Metabolism	Yes	FALSE	TRUE	FALSE	FALSE	FALSE	FALSE	TRUE	TRUE	FALSE	FALSE	FALSE	FALSE
10.1007/s00198-016-3765-6			closed	Further major uncorrected errors in National Osteoporosis Foundation meta-analyses of calcium and vitamin D supplementation in fracture prevention	Avenell, A.; Bolland, M. J.; Grey, A.; Reid, I. R.	4	No	Osteoporosis International	2017	Springer Nature	FALSE	journal-article		FALSE			No		0	FALSE	1433-2965	12 months embargo	cannot	green		3						USD	3000	3000	Sir Charles Hercus Health Research Fellowship; Chief Scientist Office of the Scottish Government Health Directorates; Health Research Council (HRC) of New Zealand; Chief Scientist Office [HSRU1]	Endocrinology & Metabolism	No	FALSE	TRUE	FALSE	FALSE	FALSE	FALSE	FALSE	TRUE	FALSE	FALSE	FALSE	FALSE
10.1007/s00198-017-3960-0			closed	Effect of single-dose dexamethasone on acute phase response following zoledronic acid: a randomized controlled trial	Billington, E. O.; Horne, A.; Gamble, G. D.; Maslowski, K.; House, M.; Reid, I. R.	6	No	Osteoporosis International	2017	Springer Nature	FALSE	journal-article		FALSE			No		0	FALSE	1433-2965	12 months embargo	cannot	green		2						USD	3000	3000	Health Research Council of New Zealand; University of Auckland; University of Calgary	Endocrinology & Metabolism	Yes	FALSE	TRUE	FALSE	FALSE	FALSE	FALSE	FALSE	TRUE	FALSE	FALSE	FALSE	FALSE
10.1007/s00198-017-3988-1			closed	Are more trials of calcium supplements really needed?	Bolland, M. J.; Grey, A.; Reid, I. R.	3	No	Osteoporosis International	2017	Springer Nature	FALSE	journal-article		FALSE			No		0	FALSE	1433-2965	12 months embargo	cannot	green		1						USD	3000	3000	Health Research Council (HRC) of New Zealand	Endocrinology & Metabolism	Yes	FALSE	TRUE	FALSE	FALSE	FALSE	FALSE	FALSE	TRUE	FALSE	FALSE	FALSE	FALSE
10.1007/s00199-016-0977-0			closed	Wealth inequality and financial development: revisiting the symmetry breaking mechanism	Zhang, Haiping	1	No	Economic Theory	2017	Springer Nature	FALSE	journal-article		FALSE			No		0	FALSE	1432-0479	12 months embargo	cannot	green		0						USD	3000	3000	Singapore Management University	Business & Economics	No	FALSE	FALSE	FALSE	FALSE	FALSE	FALSE	FALSE	FALSE	FALSE	FALSE	FALSE	FALSE
10.1007/s00209-016-1701-2			closed	A van der Corput-type lemma for power bounded operators	Ter Elst, A. F. M.; M\\U00Fcller, V.	2	No	Mathematische Zeitschrift	2017	Springer Nature	FALSE	journal-article		FALSE			No		0	FALSE	1432-1823	12 months embargo	cannot	green		0						USD	3000	3000	Grants IRSES of GA CR [14-07880S]; [RVO: 67985840]	Mathematics	No	FALSE	FALSE	FALSE	FALSE	FALSE	FALSE	FALSE	FALSE	FALSE	FALSE	FALSE	FALSE
10.1007/s00213-017-4638-1			closed	Caffeine increases the velocity of rapid eye movements in unfatigued humans	Connell, Charlotte J. W.; Thompson, Benjamin; Turuwhenua, Jason; Hess, Robert F.; Gant, Nicholas	5	No	Psychopharmacology	2017	Springer Nature	FALSE	journal-article		FALSE			No		0	FALSE	1432-2072	12 months embargo	cannot	green		1						USD	3000	3000		Neurosciences & Neurology; Pharmacology & Pharmacy; Psychiatry	Yes	FALSE	FALSE	FALSE	FALSE	FALSE	FALSE	FALSE	FALSE	FALSE	FALSE	FALSE	FALSE
10.1007/s00216-017-0347-1	open (via page says license)	cc-by	hybrid	A rapid and low-cost estimation of bacteria counts in solution using fluorescence spectroscopy	Guo, Rachel; Mcgoverin, Cushla; Swift, Simon; Vanholsbeeck, Frederique	4	No	Analytical and Bioanalytical Chemistry	2017	Springer Nature	TRUE	journal-article		FALSE	publishedVersion	publisher	Yes	pubmedcentral.nih.gov	1	FALSE	1618-2650	12 months embargo	cannot	green		3	https://doi.org/10.1007/s00216-017-0347-1					USD	3000	3000	Zealand Ministry of Business Innovation and Employment [UOAX1411]; University of Auckland	Biochemistry & Molecular Biology; Chemistry	Yes	FALSE	FALSE	FALSE	FALSE	FALSE	TRUE	FALSE	TRUE	FALSE	FALSE	FALSE	FALSE
10.1007/s00220-016-2790-9	open (via page says license)	cc-by	hybrid	Vanishing Corrections for the Position in a Linear Model of FKPP Fronts	Berestycki, Julien; Brunet, \\U00C9Ric; Harris, Simon C.; Roberts, Matt	4	No	Communications in Mathematical Physics	2017	Springer Nature	TRUE	journal-article		FALSE	publishedVersion	publisher	Yes	opus.bath.ac.uk arXiv.org	2	FALSE	1432-0916	12 months embargo	cannot	green		4	https://doi.org/10.1007/s00220-016-2790-9					USD	3000	3000	Engineering and Physical Sciences Research Council [EP/K007440/1]	Physics	No	FALSE	FALSE	FALSE	FALSE	FALSE	FALSE	FALSE	FALSE	FALSE	FALSE	FALSE	FALSE
10.1007/s00221-016-4775-5			closed	Posture interacts with arm weight support to modulate corticomotor excitability to the upper limb	Runnalls, Keith D.; Anson, Greg; Byblow, Winston D.	3	No	Experimental Brain Research	2017	Springer Nature	FALSE	journal-article		FALSE			No		0	FALSE	1432-1106	12 months embargo	cannot	green		0						USD	3000	3000	University of Auckland Doctoral Scholarship; University of Auckland FRDF grant	Neurosciences & Neurology	Yes	FALSE	FALSE	FALSE	FALSE	FALSE	FALSE	FALSE	FALSE	FALSE	FALSE	FALSE	FALSE
10.1007/s00221-017-4891-x			closed	Eye movements show similar adaptations in temporal coordination to movement planning conditions in both people with and without cerebral palsy	Payne, Alexander R.; Plimmer, Beryl; Mcdaid, Andrew; Davies, T. Claire	4	No	Experimental Brain Research	2017	Springer Nature	FALSE	journal-article		FALSE			No		0	FALSE	1432-1106	12 months embargo	cannot	green		1						USD	3000	3000		Neurosciences & Neurology	Yes	FALSE	FALSE	FALSE	FALSE	FALSE	FALSE	FALSE	FALSE	FALSE	FALSE	FALSE	FALSE
10.1007/s00221-017-5023-3	oa repository (via OAI-PMH title and first author match)		green	Characterisation of Peptide5 systemic administration for treating traumatic spinal cord injured rats	Mao, Yilin; Nguyen, Tara; Tonkin, Ryan S.; Lees, Justin G.; Warren, Caitlyn; O\\U2019Carroll, Simon J.; Nicholson, Louise F. B.; Green, Colin R.; Moalem-Taylor, Gila; Gorrie, Catherine A.	10	No	Experimental Brain Research	2017	Springer Nature	TRUE	journal-article		FALSE	submittedVersion	repository	Yes	opus.lib.uts.edu.au	1	FALSE	1432-1106	12 months embargo	cannot	green		3	https://opus.lib.uts.edu.au/bitstream/10453/115736/4/28725925%20am.pdf					USD	3000	3000	Australasian Spinal Cord Injury Network; CatWalk Spinal Cord Injury Trust New Zealand; University of Technology Sydney Doctoral Scholarship; Australian Government Research Training Program Scholarship	Neurosciences & Neurology	No	FALSE	FALSE	FALSE	FALSE	FALSE	FALSE	FALSE	FALSE	FALSE	FALSE	FALSE	FALSE
10.1007/s00223-016-0214-7			closed	Long-Term Effects of Intravenous Ibandronate in Pagetâ€™s Disease of Bone	Reid, Ian R.; Wattie, Diana; Gamble, Gregory D.; Kalluru, Ramanamma; Cundy, Tim	5	No	Calcified Tissue International	2017	Springer Nature	FALSE	journal-article		FALSE			No		0	FALSE	1432-0827	12 months embargo	cannot	green		4						USD	3000	3000	Health Research Council of New Zealand	Endocrinology & Metabolism	Yes	FALSE	TRUE	FALSE	FALSE	FALSE	FALSE	FALSE	TRUE	FALSE	FALSE	FALSE	FALSE
10.1007/s00223-016-0216-5			closed	The Activity of Adiponectin in Bone	Naot, Dorit; Musson, David S.; Cornish, Jillian	3	No	Calcified Tissue International	2017	Springer Nature	FALSE	journal-article		FALSE			No		0	FALSE	1432-0827	12 months embargo	cannot	green		12						USD	3000	3000	Health Research Council of New Zealand; Auckland Medical Research Foundation	Endocrinology & Metabolism	Yes	FALSE	TRUE	FALSE	FALSE	FALSE	FALSE	TRUE	TRUE	FALSE	FALSE	FALSE	FALSE
10.1007/s00223-017-0261-8			closed	Long-Term Bone Scintigraphy Results After Intravenous Zoledronate in Pagetâ€™s Disease of Bone	Reid, Ian R.; Maslowski, Katherine	2	No	Calcified Tissue International	2017	Springer Nature	FALSE	journal-article		FALSE			No		0	FALSE	1432-0827	12 months embargo	cannot	green		1						USD	3000	3000	Health Research Council of New Zealand	Endocrinology & Metabolism	Yes	FALSE	TRUE	FALSE	FALSE	FALSE	FALSE	FALSE	TRUE	FALSE	FALSE	FALSE	FALSE
10.1007/s00223-017-0288-x			closed	Bone Loss After Denosumab: Only Partial Protection with Zoledronate	Reid, Ian R.; Horne, Anne M.; Mihov, Borislav; Gamble, Gregory D.	4	No	Calcified Tissue International	2017	Springer Nature	FALSE	journal-article		FALSE			No		0	FALSE	1432-0827	12 months embargo	cannot	green		27						USD	3000	3000	Health Research Council of New Zealand	Endocrinology & Metabolism	Yes	FALSE	TRUE	FALSE	FALSE	FALSE	FALSE	FALSE	TRUE	FALSE	FALSE	FALSE	FALSE
10.1007/s00224-017-9792-7			closed	Semiautomatic Structures	Jain, Sanjay; Khoussainov, Bakhadyr; Stephan, Frank; Teng, Dan; Zou, Siyuan	5	No	Theory of Computing Systems	2017	Springer Nature	FALSE	journal-article		FALSE			No		0	FALSE	1433-0490	12 months embargo	cannot	green		1						USD	3000	3000	NUS grant [C252-000-087-001 R146-000-181-112 R252-000-420-112]; Marsden Fund grant of Royal Society of New Zealand; Singapore Ministry of Education Academic Research Fund Tier 2 grant [MOE2016-T2-1-019 / R146-000-234-112]	Computer Science; Mathematics	No	FALSE	FALSE	FALSE	TRUE	TRUE	FALSE	FALSE	TRUE	FALSE	FALSE	FALSE	FALSE
10.1007/s00227-017-3140-y			closed	Importance of the invasive macroalga Undaria pinnatifida as trophic subsidy for a beach consumer	Su\\U00E1Rez-Jim\\U00E9Nez, Roc\\U00Edo; Hepburn, Christopher D.; Hyndes, Glenn A.; Mcleod, Rebecca J.; Taylor, Richard B.; Hurd, Catriona L.	6	No	Marine Biology	2017	Springer Nature	FALSE	journal-article		FALSE			No		0	FALSE	1432-1793	12 months embargo	cannot	green		4						USD	3000	3000	Otago University Doctoral Scholarship; Department of Botany University of Otago; Foundation for Research Science and Technology (FRST) from the National Institute of Water and Atmospheric Research Ltd.; Biodiversity and Biosecurity OBI [C01X0502]; FRST Science and Technology Postdoctoral Fellowship [UOOX0814]	Marine & Freshwater Biology	Yes	FALSE	FALSE	FALSE	FALSE	FALSE	FALSE	FALSE	FALSE	FALSE	FALSE	FALSE	FALSE
10.1007/s00227-017-3209-7			closed	Maternal investment and nutrient utilization during early larval development of the sea cucumber Australostichopus mollis	Peters-Didier, Josefina; Sewell, Mary A.	2	No	Marine Biology	2017	Springer Nature	FALSE	journal-article		FALSE			No		0	FALSE	1432-1793	12 months embargo	cannot	green		2						USD	3000	3000	Chilean Government scholarship (Becas-Chile National Commission for Scientific and Technological Research CONICYT)	Marine & Freshwater Biology	Yes	FALSE	FALSE	FALSE	FALSE	FALSE	FALSE	FALSE	FALSE	FALSE	FALSE	FALSE	FALSE
10.1007/s00227-017-3223-9			closed	The nutritional basis of seasonal selective feeding by a marine herbivorous fish	Johnson, Jethro S.; Clements, Kendall D.; Raubenheimer, David	3	No	Marine Biology	2017	Springer Nature	FALSE	journal-article		FALSE			No		0	FALSE	1432-1793	12 months embargo	cannot	green		1						USD	3000	3000	Royal Society of New Zealand [UOA0404]; Commonwealth Scholarship - Commonwealth Scholarship Commission UK	Marine & Freshwater Biology	Yes	FALSE	FALSE	FALSE	FALSE	TRUE	FALSE	FALSE	TRUE	FALSE	FALSE	FALSE	FALSE
10.1007/s00234-017-1816-0			closed	Diffusion tensor imaging as a prognostic biomarker for motor recovery and rehabilitation after stroke	Puig, Josep; Blasco, Gerard; Schlaug, Gottfried; Stinear, Cathy M; Daunis-I-Estadella, Pepus; Biarnes, Carles; Figueras, Jaume; Serena, Joaqu\\U00Edn; Hern\\U00E1Ndez-P\\U00E9Rez, Maria; Alberich-Bayarri, Angel; Castellanos, Mar; Liebeskind, David S; Demchuk, Andrew M; Menon, Bijoy K; Thomalla, G\\U00F6Tz; Nael, Kambiz; Wintermark, Max; Pedraza, Salvador	18	No	Neuroradiology	2017	Springer Nature	FALSE	journal-article		FALSE			No		0	FALSE	1432-1920	12 months embargo	cannot	green		19						USD	3000	3000	Spanish Ministry of Health (Fondo de Investigaciones Sanitarias) [PI060745]; Alberta Innovates [201300690]	Neurosciences & Neurology; Radiology, Nuclear Medicine & Medical Imaging	No	FALSE	FALSE	FALSE	FALSE	FALSE	FALSE	FALSE	FALSE	FALSE	FALSE	FALSE	FALSE
10.1007/s00267-017-0823-6			closed	Spatial Dependence and Determinants of Dairy Farmersâ€™ Adoption of Best Management Practices for Water Protection in New Zealand	Yang, Wei; Sharp, Basil	2	No	Environmental Management	2017	Springer Nature	FALSE	journal-article		FALSE			No		0	FALSE	1432-1009	12 months embargo	cannot	green		2						USD	3000	3000		Environmental Sciences & Ecology	Yes	FALSE	FALSE	FALSE	FALSE	FALSE	FALSE	FALSE	FALSE	FALSE	FALSE	FALSE	FALSE
10.1007/s00268-016-3737-1			closed	Evidence-Based Management of Pain After Excisional Haemorrhoidectomy Surgery: A PROSPECT Review Update	Sammour, Tarik; Barazanchi, Ahmed W. H.; Hill, Andrew G.	3	No	World Journal of Surgery	2017	Springer Nature	FALSE	journal-article		FALSE			No		0	FALSE	1432-2323	12 months embargo	cannot	green		12						USD	3000	3000		Surgery	No	FALSE	FALSE	FALSE	FALSE	FALSE	FALSE	FALSE	FALSE	FALSE	FALSE	FALSE	FALSE
10.1007/s00268-017-3926-6			closed	Clinical Prediction Rules for Appendicitis in Adults: Which Is Best?	Kularatna, Malsha; Lauti, Melanie; Haran, Cheyaanthan; Macfater, Wiremu; Sheikh, Laila; Huang, Ying; Mccall, John; Maccormick, Andrew D.	8	No	World Journal of Surgery	2017	Springer Nature	FALSE	journal-article		FALSE			No		0	FALSE	1432-2323	12 months embargo	cannot	green		5						USD	3000	3000		Surgery	Yes	FALSE	FALSE	FALSE	FALSE	FALSE	FALSE	FALSE	FALSE	FALSE	FALSE	FALSE	FALSE
10.1007/s00268-017-4012-9			closed	Uncomplicated Acute Diverticulitis: Identifying Risk Factors for Severe Outcomes	Jaung, Rebekah; Kularatna, Malsha; Robertson, Jason P.; Vather, Ryash; Rowbotham, David; Maccormick, Andrew D.; Bissett, Ian P.	7	No	World Journal of Surgery	2017	Springer Nature	FALSE	journal-article		FALSE			No		0	FALSE	1432-2323	12 months embargo	cannot	green		4						USD	3000	3000	Auckland Medical Research Foundation [1214005]	Surgery	Yes	FALSE	FALSE	FALSE	FALSE	FALSE	FALSE	TRUE	FALSE	FALSE	FALSE	FALSE	FALSE
10.1007/s00300-016-1926-x	oa repository (via OAI-PMH title and first author match)		green	Demography and ecology of southern right whales Eubalaena australis wintering at sub-Antarctic Campbell Island, New Zealand	Torres, Leigh G.; Rayment, Will; Olavarr\\U00Eda, Carlos; Thompson, David R.; Graham, Brittany; Baker, C. Scott; Patenaude, Nathalie; Bury, Sarah Jane; Boren, Laura; Parker, Graham; Carroll, Emma L.	11	No	Polar Biology	2017	Springer Nature	TRUE	journal-article		FALSE	acceptedVersion	repository	Yes	research-repository.st-andrews.ac.uk	1	FALSE	1432-2056	12 months embargo	cannot	green		7	https://research-repository.st-andrews.ac.uk/bitstream/10023/10509/1/Torres2016_SRW_at_CI_ms_v2_Revised_Manuscript.pdf					USD	3000	3000	National Institute of Water and Atmospheric Research Ltd. (NIWA); New Zealand Department of Conservation	Biodiversity & Conservation; Environmental Sciences & Ecology	No	FALSE	FALSE	FALSE	FALSE	FALSE	FALSE	FALSE	FALSE	FALSE	FALSE	FALSE	FALSE
10.1007/s00300-017-2142-z	oa repository (via OAI-PMH doi match)		green	Blood O2 affinity of a large polar elasmobranch, the Greenland shark Somniosus microcephalus	Herbert, N. A.; Skov, P. V.; Tirsgaard, B.; Bushnell, P. G.; Brill, R. W.; Harvey Clark, C.; Steffensen, J. F.	7	No	Polar Biology	2017	Springer Nature	TRUE	journal-article		FALSE	null	repository	Yes	pure.atira.dk	1	FALSE	1432-2056	12 months embargo	cannot	green		2	http://orbit.dtu.dk/en/publications/blood-o2-affinity-of-a-large-polar-elasmobranch-the-greenland-shark-somniosus-microcephalus(7b0f300d-d373-4c8f-a5ca-497c50f2f563).html					USD	3000	3000	Danish Center for Marine Research; Carlsberg Foundation; Save Our Seas Foundation [P219]; KVUG (Commission for Scientific Research in Greenland)	Biodiversity & Conservation; Environmental Sciences & Ecology	Yes	FALSE	FALSE	FALSE	FALSE	FALSE	FALSE	FALSE	FALSE	FALSE	FALSE	FALSE	FALSE
10.1007/s00330-016-4468-2	oa repository (via OAI-PMH title and first author match)		green	Hypertensive heart disease versus hypertrophic cardiomyopathy: multi-parametric cardiovascular magnetic resonance discriminators when end-diastolic wall thickness â‰¥ 15 mm	Rodrigues, Jonathan C. L.; Rohan, Stephen; Ghosh Dastidar, Amardeep; Harries, Iwan; Lawton, Christopher B.; Ratcliffe, Laura E.; Burchell, Amy E.; Hart, Emma C.; Hamilton, Mark C. K.; Paton, Julian F. R.; Nightingale, Angus K.; Manghat, Nathan E.	12	No	European Radiology	2017	Springer Nature	TRUE	journal-article		FALSE	submittedVersion	repository	Yes	research-information.bris.ac.uk	1	FALSE	1432-1084	12 months embargo	cannot	green		11	https://research-information.bristol.ac.uk/files/114083313/Revision_mark_up_v.2.pdf					USD	3000	3000	National Institute for Health Research Cardiovascular Biomedical Research Unit Bristol Heart Institute; Clinical Society of Bath; Royal College of Radiologists Kodak Research Scholarship; British Heart Foundation [IBSRF FS/11/1/28400]; British Heart Foundation	Radiology, Nuclear Medicine & Medical Imaging	No	FALSE	FALSE	FALSE	FALSE	FALSE	FALSE	FALSE	FALSE	TRUE	FALSE	FALSE	FALSE
10.1007/s00338-016-1501-5			closed	Uncoupling temperature-dependent mortality from lipid depletion for scleractinian coral larvae	Graham, E. M.; Baird, A. H.; Connolly, S. R.; Sewell, M. A.; Willis, B. L.	5	No	Coral Reefs	2017	Springer Nature	FALSE	journal-article		FALSE			No		0	FALSE	1432-0975	12 months embargo	cannot	green		3						USD	3000	3000	Great Barrier Reef Marine Park Authority as a Science for Management Award	Marine & Freshwater Biology	No	FALSE	FALSE	FALSE	FALSE	FALSE	FALSE	FALSE	FALSE	FALSE	FALSE	FALSE	FALSE
10.1007/s00338-017-1588-3			closed	Benthic Crustacea from tropical and temperate reef locations: differences in assemblages and their relationship with habitat structure	Kramer, Michael J.; Bellwood, David R.; Taylor, Richard B.; Bellwood, Orpha	4	No	Coral Reefs	2017	Springer Nature	FALSE	journal-article		FALSE			No		0	FALSE	1432-0975	12 months embargo	cannot	green		1						USD	3000	3000	Lizard Island Research Station; Australian Research Council	Marine & Freshwater Biology	No	FALSE	FALSE	FALSE	FALSE	FALSE	FALSE	FALSE	FALSE	FALSE	FALSE	FALSE	FALSE
10.1007/s00338-017-1592-7	oa repository (via OAI-PMH title and first author match)		green	Terrigenous sediment-dominated reef platform infilling: an unexpected precursor to reef island formation and a test of the reef platform sizeâ€“island age model in the Pacific	Perry, Ct; Kench, Ps; Smithers, Sg; Riegl, Br; Gulliver, P; Daniells, Jj	6	No	Coral Reefs	2017	Springer Nature	TRUE	journal-article		FALSE	submittedVersion	repository	Yes	eprints.gla.ac.uk	1	FALSE	1432-0975	12 months embargo	cannot	green		1	http://eprints.gla.ac.uk/141871/7/141871.pdf					USD	3000	3000	IAG Working Group REEForm; UK Natural Environment Research Council [NRCF010001 1654.0912]	Marine & Freshwater Biology	No	FALSE	FALSE	FALSE	FALSE	FALSE	FALSE	FALSE	FALSE	FALSE	FALSE	FALSE	FALSE
10.1007/s00345-016-1915-2			closed	Surgical control and margin status after robotic and open cystectomy in high-risk cases: Caution or equivalence?	Sharma, Pranav; Zargar-Shoshtari, Kamran; Poch, Michael A.; Pow-Sang, Julio M.; Sexton, Wade J.; Spiess, Philippe E.; Gilbert, Scott M.	7	No	World Journal of Urology	2017	Springer Nature	FALSE	journal-article		FALSE			No		0	FALSE	1433-8726	12 months embargo	cannot	green		4						USD	3000	3000		Urology & Nephrology	No	FALSE	FALSE	FALSE	FALSE	FALSE	FALSE	FALSE	FALSE	FALSE	FALSE	FALSE	FALSE
10.1007/s00345-017-2065-x			closed	Dose dense MVAC prior to radical cystectomy: a real-world experience	Zargar, Homayoun; Shah, Jay B.; Van De Putte, Elisabeth E. Fransen; Potvin, Kylea R.; Zargar-Shoshtari, Kamran; Van Rhijn, Bas W.; Daneshmand, Siamak; Holzbeierlein, Jeff M.; Spiess, Philippe E.; Winquist, Eric; Horenblas, Simon; Dinney, Colin; Black, Peter C.; Kassouf, Wassim	14	No	World Journal of Urology	2017	Springer Nature	FALSE	journal-article		FALSE			No		0	FALSE	1433-8726	12 months embargo	cannot	green		3						USD	3000	3000		Urology & Nephrology	No	FALSE	FALSE	FALSE	FALSE	FALSE	FALSE	FALSE	FALSE	FALSE	FALSE	FALSE	FALSE
10.1007/s00355-017-1026-z	open (via page says license)	cc-by	hybrid	Properties of multiwinner voting rules	Elkind, Edith; Faliszewski, Piotr; Skowron, Piotr; Slinko, Arkadii	4	No	Social Choice and Welfare	2017	Springer Nature	TRUE	journal-article		FALSE	publishedVersion	publisher	Yes	arXiv.org	1	FALSE	1432-217X	12 months embargo	cannot	green		17	https://doi.org/10.1007/s00355-017-1026-z					USD	3000	3000	ERC [639945]; NCN [2012/06/M/ST1/00358 2011/03/B/ST6/01393]; Polish Ministry of Science and Higher Education (under AGH University) [11.11.230.015]; Marsden Fund of The Royal Society of New Zealand [3706352]	Business & Economics; Mathematical Methods In Social Sciences	No	FALSE	FALSE	FALSE	TRUE	TRUE	FALSE	FALSE	TRUE	FALSE	FALSE	FALSE	FALSE
10.1007/s00402-017-2795-7			closed	Do surgical helmet systems affect intraoperative wound contamination? A randomised controlled trial	Shirley, Otis C.; Bayan, Ali; Zhu, Mark; Dalton, James P.; Wiles, Siouxsie; Young, Simon W.	6	No	Archives of Orthopaedic and Trauma Surgery	2017	Springer Nature	FALSE	journal-article		FALSE			No		0	FALSE	1434-3916	12 months embargo	cannot	green		4						USD	3000	3000	Wishbone Trust NZOA	Orthopedics; Surgery	No	FALSE	FALSE	FALSE	FALSE	FALSE	FALSE	FALSE	FALSE	FALSE	FALSE	FALSE	FALSE
10.1007/s00410-017-1360-2			closed	A geochemical approach to distinguishing competing tectono-magmatic processes preserved in small eruptive centres	Mcgee, Lucy E.; Brahm, Raimundo; Rowe, Michael C.; Handley, Heather K.; Morgado, Eduardo; Lara, Luis E.; Turner, Michael B.; Vinet, Nicolas; Parada, Miguel-\\U00C1Ngel; Valdivia, Pedro	10	No	Contributions to Mineralogy and Petrology	2017	Springer Nature	FALSE	journal-article		FALSE			No		0	FALSE	1432-0967	12 months embargo	cannot	green		4						USD	3000	3000	FONDECYT [11130296 1107022]; FONDAP [15090013]; Australian Research Council Future Fellowship [FT120100440]; CONICYT/FONDECYT [3140353]	Geochemistry & Geophysics; Mineralogy	No	FALSE	FALSE	FALSE	FALSE	FALSE	FALSE	FALSE	FALSE	FALSE	FALSE	FALSE	FALSE
10.1007/s00417-017-3779-6			closed	Variations in optic nerve head morphology by intraocular pressure in open-angle glaucoma	Wong, Aaron; Matheos, Kaliopy; Prime, Zak; Danesh-Meyer, Helen V.	4	No	Graefe's Archive for Clinical and Experimental Ophthalmology	2017	Springer Nature	FALSE	journal-article		FALSE			No		0	FALSE	1435-702X	12 months embargo	cannot	green		0						USD	3000	3000		Ophthalmology	Yes	FALSE	FALSE	FALSE	FALSE	FALSE	FALSE	FALSE	FALSE	FALSE	FALSE	FALSE	FALSE
10.1007/s00421-017-3563-7	oa repository (via OAI-PMH title and first author match)		green	Standing economy: does the heterogeneity in the energy cost of posture maintenance reside in differential patterns of spontaneous weight-shifting?	Miles-Chan, Jennifer L.; Fares, Elie-Jacques; Berkachy, Redina; Jacquet, Philippe; Isacco, Laurie; Schutz, Yves; Montani, Jean-Pierre; Dulloo, Abdul G.	8	No	European Journal of Applied Physiology	2017	Springer Nature	TRUE	journal-article		FALSE	submittedVersion	repository	Yes	doc.rero.ch	1	FALSE	1439-6327	12 months embargo	cannot	green		4	http://doc.rero.ch/record/288947/files/dull_sed.pdf					USD	3000	3000	University of Fribourg Internal Research Funding Scheme; Swiss National Science Foundation [310030_152870]	Physiology; Sport Sciences	No	FALSE	FALSE	FALSE	FALSE	FALSE	FALSE	FALSE	FALSE	FALSE	FALSE	FALSE	FALSE
10.1007/s00421-017-3639-4			closed	Age and sex differences in human skeletal muscle fibrosis markers and transforming growth factor-Î² signaling	Parker, Lewan; Caldow, Marissa K.; Watts, Rani; Levinger, Pazit; Cameron-Smith, David; Levinger, Itamar	6	No	European Journal of Applied Physiology	2017	Springer Nature	FALSE	journal-article		FALSE			No		0	FALSE	1439-6327	12 months embargo	cannot	green		5						USD	3000	3000	National Heart Foundation of Australia [100040]	Physiology; Sport Sciences	No	FALSE	FALSE	FALSE	FALSE	FALSE	FALSE	FALSE	FALSE	FALSE	FALSE	FALSE	FALSE
10.1007/s00429-016-1225-x			closed	Neuroanatomy of the killer whale (Orcinus orca): a magnetic resonance imaging investigation of structure with insights on function and evolution	Wright, Alexandra; Scadeng, Miriam; Stec, Dominik; Dubowitz, Rebecca; Ridgway, Sam; Leger, Judy St.	6	No	Brain Structure and Function	2017	Springer Nature	FALSE	journal-article		FALSE			No		0	FALSE	1863-2661	12 months embargo	cannot	green		5						USD	3000	3000	National Science Foundation	Anatomy & Morphology; Neurosciences & Neurology	No	FALSE	FALSE	FALSE	FALSE	FALSE	FALSE	FALSE	FALSE	FALSE	FALSE	TRUE	TRUE
10.1007/s00430-017-0510-5			closed	A potential role for staphylococcal and streptococcal superantigens in driving skewing of TCR VÎ² subsets in tonsillar hyperplasia	Radcliff, Fiona J.; Clow, Fiona; Mahadevan, Murali; Johnston, James; Proft, Thomas; Douglas, Richard G.; Fraser, John D.	7	No	Medical Microbiology and Immunology	2017	Springer Nature	FALSE	journal-article		FALSE			No		0	FALSE	1432-1831	12 months embargo	cannot	green		2						USD	3000	3000	Maurice Wilkins Centre for Biodiscovery; Health Research Council (HRC) of New Zealand; Maurice and Phyllis Paykel Trust	Immunology; Microbiology	Yes	FALSE	TRUE	FALSE	FALSE	FALSE	FALSE	FALSE	TRUE	FALSE	FALSE	FALSE	FALSE
10.1007/s00442-017-3809-4			closed	Predation cues rather than resource availability promote cryptic behaviour in a habitat-forming sea urchin	Spyksma, Arie J. P.; Taylor, Richard B.; Shears, Nick T.	3	No	Oecologia	2017	Springer Nature	FALSE	journal-article		FALSE			No		0	FALSE	1432-1939	12 months embargo	cannot	green		2						USD	3000	3000	New Zealand Department of Conservation; National Institute of Water and Atmospheric Research	Environmental Sciences & Ecology	Yes	FALSE	FALSE	FALSE	FALSE	FALSE	FALSE	FALSE	FALSE	FALSE	FALSE	FALSE	FALSE
10.1007/s00445-016-1085-5			closed	New insights into Holocene eruption episodes from proximal deposit sequences at Mt. Taranaki (Egmont), New Zealand	Torres-Orozco, Rafael; Cronin, Shane J.; Pardo, Natalia; Palmer, Alan S.	4	No	Bulletin of Volcanology	2017	Springer Nature	FALSE	journal-article		FALSE			No		0	FALSE	1432-0819	12 months embargo	cannot	green		6						USD	3000	3000	'Quantifying exposure to specific and multiple volcanic hazards' programme of the NZ Natural Hazards Research Platform; Massey University Doctoral Scholarship; CONACyT (Mexico) Doctoral Scholarship; George Mason Trust of Taranaki	Geology	Yes	FALSE	FALSE	FALSE	FALSE	FALSE	FALSE	FALSE	FALSE	FALSE	FALSE	FALSE	FALSE
10.1007/s00445-017-1133-9			closed	The spatial and temporal â€˜costâ€™ of volcanic eruptions: assessing economic impact, business inoperability, and spatial distribution of risk in the Auckland region, New Zealand	Mcdonald, Garry W.; Smith, Nicola J.; Kim, Joon-Hwan; Cronin, Shane J.; Proctor, Jon N.	5	No	Bulletin of Volcanology	2017	Springer Nature	FALSE	journal-article		FALSE			No		0	FALSE	1432-0819	12 months embargo	cannot	green		4						USD	3000	3000	Ministry of Business Innovation and Employment (MBIE) [MAUX0808 C05X1205]; Foundation of Research Science and Technology (FRST)	Geology	No	FALSE	FALSE	FALSE	FALSE	FALSE	TRUE	FALSE	TRUE	FALSE	FALSE	FALSE	FALSE
10.1007/s00445-017-1162-4			closed	Diverse dynamics of Holocene mafic-intermediate Plinian eruptions at Mt. Taranaki (Egmont), New Zealand	Torres-Orozco, Rafael; Cronin, Shane J.; Damaschke, Magret; Pardo, Natalia	4	No	Bulletin of Volcanology	2017	Springer Nature	FALSE	journal-article		FALSE			No		0	FALSE	1432-0819	12 months embargo	cannot	green		1						USD	3000	3000	Quantifying exposure to specific and multiple volcanic hazards programme of the NZ Natural Hazards Research Platform; Massey University Doctoral Scholarship; CONACyT (Mexico) Doctoral Scholarship; George Mason Trust of Taranaki	Geology	No	FALSE	FALSE	FALSE	FALSE	FALSE	FALSE	FALSE	FALSE	FALSE	FALSE	FALSE	FALSE
10.1007/s00445-017-1171-3			closed	Computable general equilibrium modelling of economic impacts from volcanic event scenarios at regional and national scale, Mt. Taranaki, New Zealand	Mcdonald, G. W.; Cronin, S. J.; Kim, J.-H.; Smith, N. J.; Murray, C. A.; Procter, J. N.	6	No	Bulletin of Volcanology	2017	Springer Nature	FALSE	journal-article		FALSE			No		0	FALSE	1432-0819	12 months embargo	cannot	green		0						USD	3000	3000	New Zealand Natural Hazards Research Platform; Resilience to Nature's Challenges National Science Challenge	Geology	No	FALSE	FALSE	FALSE	FALSE	FALSE	FALSE	FALSE	FALSE	FALSE	FALSE	FALSE	FALSE
10.1007/s00455-016-9776-9			closed	Measuring Competency Development in Objective Evaluation of Videofluoroscopic Swallowing Studies	Nordin, Natrah Ahmad; Miles, Anna; Allen, Jacqui	3	No	Dysphagia	2017	Springer Nature	FALSE	journal-article		FALSE			No		0	FALSE	1432-0460	12 months embargo	cannot	green		6						USD	3000	3000		Otorhinolaryngology	Yes	FALSE	FALSE	FALSE	FALSE	FALSE	FALSE	FALSE	FALSE	FALSE	FALSE	FALSE	FALSE
10.1007/s00464-016-5274-2			closed	Interventions to optimize recovery after laparoscopic appendectomy: a scoping review	Hamill, James K.; Rahiri, Jamie-Lee; Gunaratna, Gamage; Hill, Andrew G.	4	No	Surgical Endoscopy	2017	Springer Nature	FALSE	journal-article		FALSE			No		0	FALSE	1432-2218	12 months embargo	cannot	green		4						USD	3000	3000		Surgery	Yes	FALSE	FALSE	FALSE	FALSE	FALSE	FALSE	FALSE	FALSE	FALSE	FALSE	FALSE	FALSE
10.1007/s00468-016-1407-4			closed	Sap flow-based transpiration in Phyllostachys pubescens: applicability of the TDP methodology, age effect and rhizome role	Xiu-Hua, Zhao; Ping, Zhao; Zhen-Zhen, Zhang; Li-Wei, Zhu; Jun-Feng, Niu; Guang-Yan, Ni; Yan-Ting, Hu; Lei, Ouyang	8	No	Trees	2017	Springer Nature	FALSE	journal-article		FALSE			No		0	FALSE	1432-2285	12 months embargo	cannot	green		3						USD	3000	3000	National Natural Science Foundation of China [31170673 41030638 41275169]; Natural Science Foundation of Guangdong Province [S2012020010933]	Forestry	No	FALSE	FALSE	FALSE	FALSE	FALSE	FALSE	FALSE	FALSE	FALSE	FALSE	FALSE	FALSE
10.1007/s00468-017-1521-y			closed	Sustained carbon uptake in a mixed age southern conifer forest	Macinnis-Ng, Cate; Wyse, Sarah V.; Webb, Tristan; Taylor, Daniel; Schwendenmann, Luitgard	5	No	Trees	2017	Springer Nature	FALSE	journal-article		FALSE			No		0	FALSE	1432-2285	12 months embargo	cannot	green		0						USD	3000	3000	University of Auckland	Forestry	Yes	FALSE	FALSE	FALSE	FALSE	FALSE	FALSE	FALSE	FALSE	FALSE	FALSE	FALSE	FALSE
10.1007/s00477-016-1272-0			closed	Flood estimation in ungauged catchments: application of artificial intelligence based methods for Eastern Australia	Aziz, K.; Haque, M. M.; Rahman, A.; Shamseldin, A. Y.; Shoaib, M.	5	No	Stochastic Environmental Research and Risk Assessment	2017	Springer Nature	FALSE	journal-article		FALSE			No		0	FALSE	1436-3259	12 months embargo	cannot	green		8						USD	3000	3000		Engineering; Environmental Sciences & Ecology; Mathematics; Water Resources	No	FALSE	FALSE	FALSE	FALSE	FALSE	FALSE	FALSE	FALSE	FALSE	FALSE	FALSE	FALSE
10.1007/s00520-017-3827-0			closed	Safety and feasibility of exercise interventions in patients with advanced cancer: a systematic review	Heywood, Reginald; Mccarthy, Alexandra L.; Skinner, Tina L.	3	No	Supportive Care in Cancer	2017	Springer Nature	FALSE	journal-article		FALSE			No		0	FALSE	1433-7339	12 months embargo	cannot	green		8						USD	3000	3000		Oncology; Health Care Sciences & Services; Rehabilitation	No	FALSE	FALSE	FALSE	FALSE	FALSE	FALSE	FALSE	FALSE	FALSE	FALSE	FALSE	FALSE
10.1007/s00586-017-5252-y			closed	A more realistic disc herniation model incorporating compression, flexion and facet-constrained shear: a mechanical and microstructural analysis. Part I: Low rate loading	Wade, Kelly R.; Schollum, Meredith L.; Robertson, Peter A.; Thambyah, Ashvin; Broom, Neil D.	5	No	European Spine Journal	2017	Springer Nature	FALSE	journal-article		FALSE			No		0	FALSE	1432-0932	12 months embargo	cannot	green		2						USD	3000	3000	Medtronic (Australasia); NuVasive	Neurosciences & Neurology; Orthopedics	Yes	FALSE	FALSE	FALSE	FALSE	FALSE	FALSE	FALSE	FALSE	FALSE	FALSE	FALSE	FALSE
10.1007/s00586-017-5253-x			closed	A more realistic disc herniation model incorporating compression, flexion and facet-constrained shear: a mechanical and microstructural analysis. Part II: high rate or â€˜surpriseâ€™ loading	Shan, Zhi; Wade, Kelly R.; Schollum, Meredith L.; Robertson, Peter A.; Thambyah, Ashvin; Broom, Neil D.	6	No	European Spine Journal	2017	Springer Nature	FALSE	journal-article		FALSE			No		0	FALSE	1432-0932	12 months embargo	cannot	green		2						USD	3000	3000	Medtronic (Australasia); NuVasive	Neurosciences & Neurology; Orthopedics	Yes	FALSE	FALSE	FALSE	FALSE	FALSE	FALSE	FALSE	FALSE	FALSE	FALSE	FALSE	FALSE
10.1007/s00775-016-1426-z			closed	Cobalt complexes as internal standards for capillary zone electrophoresisâ€“mass spectrometry studies in biological inorganic chemistry	Holtkamp, Hannah U.; Morrow, Stuart J.; Kubanik, Mario; Hartinger, Christian G.	4	No	JBIC Journal of Biological Inorganic Chemistry	2017	Springer Nature	FALSE	journal-article		FALSE			No		0	FALSE	1432-1327	12 months embargo	cannot	green		3						USD	3000	3000	University of Auckland (University of Auckland Doctoral Scholarship); India-New Zealand Education Council Education New Zealand; India-New Zealand Research Institute; Royal Society of New Zealand; COST [CM1105]	Biochemistry & Molecular Biology; Chemistry	Yes	FALSE	FALSE	FALSE	FALSE	TRUE	FALSE	FALSE	TRUE	FALSE	FALSE	FALSE	FALSE
10.1007/s00775-017-1470-3	open (via free pdf)		bronze	8th Asian Biological Inorganic Chemistry Conference	Hartinger, Christian G.	1	No	JBIC Journal of Biological Inorganic Chemistry	2017	Springer Nature	TRUE	journal-article		FALSE	publishedVersion	publisher	No		0	FALSE	1432-1327	12 months embargo	cannot	green		0	https://link.springer.com/content/pdf/10.1007%2Fs00775-017-1470-3.pdf					USD	3000	3000		Biochemistry & Molecular Biology; Chemistry	Yes	FALSE	FALSE	FALSE	FALSE	FALSE	FALSE	FALSE	FALSE	FALSE	FALSE	FALSE	FALSE
10.1007/s10021-017-0113-4	oa repository (via OAI-PMH title and first author match)		green	Macrofaunal Functional Diversity Provides Resilience to Nutrient Enrichment in Coastal Sediments	Douglas, Emily J.; Pilditch, Conrad A.; Kraan, Casper; Schipper, Louis A.; Lohrer, Andrew M.; Thrush, Simon F.	6	No	Ecosystems	2017	Springer Nature	TRUE	journal-article		FALSE	publishedVersion	repository	Yes	epic.awi.de	1	FALSE	1435-0629	12 months embargo	cannot	green		7	https://epic.awi.de/id/eprint/43933/1/Douglas_Ecosystems_2017.pdf					USD	3000	3000	Marsden Fund; Royal Society of New Zealand [NIW1102]; Marie-Curie International Outgoing Fellowship [FP7-PEOPLE-2011-IOF]; University of Waikato; [CO1x1515 4.2.1]	Environmental Sciences & Ecology	Yes	FALSE	FALSE	FALSE	TRUE	TRUE	FALSE	FALSE	TRUE	FALSE	FALSE	FALSE	FALSE
10.1007/s10067-016-3461-0			closed	Crystal identification of synovial fluid aspiration by polarized light microscopy. An online test suggesting that our traditional rheumatologic competence needs renewed attention and training	Berendsen, D.; Neogi, T.; Taylor, W. J.; Dalbeth, N.; Jansen, T. L.	5	No	Clinical Rheumatology	2017	Springer Nature	FALSE	journal-article		FALSE			No		0	FALSE	1434-9949	12 months embargo	cannot	green		11						USD	3000	3000	EULAR; ACR	Rheumatology	No	FALSE	FALSE	FALSE	FALSE	FALSE	FALSE	FALSE	FALSE	FALSE	FALSE	FALSE	FALSE
10.1007/s10144-017-0593-2			closed	Management and eradication options for Queensland fruit fly	Stringer, Lloyd D.; Kean, John M.; Beggs, Jacqueline R.; Suckling, D. Max	4	No	Population Ecology	2017	Springer Nature	FALSE	journal-article		FALSE			No		0	FALSE	1438-390X	12 months embargo	cannot	green		6						USD	3000	3000	Horticulture Innovation Australia Limited [HG13034]; Australian Government	Environmental Sciences & Ecology	Yes	FALSE	FALSE	FALSE	FALSE	FALSE	FALSE	FALSE	FALSE	FALSE	FALSE	FALSE	FALSE
10.1007/s10212-015-0282-5			closed	Teachersâ€™ reasons for using peer assessment: positive experience predicts use	Panadero, Ernesto; Brown, Gavin T. L.	2	No	European Journal of Psychology of Education	2017	Springer Nature	FALSE	journal-article		FALSE			No		0	FALSE	1878-5174	12 months embargo	cannot	green		13						USD	3000	3000	Ramon y Cajal framewok [RYC-2013-13469]	Psychology	No	FALSE	FALSE	FALSE	FALSE	FALSE	FALSE	FALSE	FALSE	FALSE	FALSE	FALSE	FALSE
10.1007/s10236-017-1101-0			closed	A numerical study of equilibrium states in tidal network morphodynamics	Xu, Fan; Coco, Giovanni; Zhou, Zeng; Tao, Jianfeng; Zhang, Changkuan	5	No	Ocean Dynamics	2017	Springer Nature	FALSE	journal-article		FALSE			No		0	FALSE	1616-7228	12 months embargo	cannot	green		1						USD	3000	3000	National Natural Science Foundation of China (NSFC) [51620105005 41606104]; Jiangsu Provincial Natural Science Foundation [BK20160862 BK20150818]; China Scholarship Council; NIWA Managing Mud Programme - Estuary Evolution	Oceanography	No	FALSE	FALSE	FALSE	FALSE	FALSE	FALSE	FALSE	FALSE	FALSE	FALSE	FALSE	FALSE
10.1007/s10237-017-0916-4			closed	A diffusion-weighted imaging informed continuum model of the rabbit triceps surae complex	Alipour, M.; Mithraratne, K.; Fernandez, J.	3	No	Biomechanics and Modeling in Mechanobiology	2017	Springer Nature	FALSE	journal-article		FALSE			No		0	FALSE	1617-7940	12 months embargo	cannot	green		3						USD	3000	3000	Robertson Foundation; MBIE [UOAX0712 UOAX1006]	Biophysics; Engineering	Yes	FALSE	FALSE	FALSE	FALSE	FALSE	TRUE	FALSE	TRUE	FALSE	FALSE	FALSE	FALSE
10.1007/s10237-017-0921-7	open (via page says license)	cc-by	hybrid	Computational modelling of wounded tissue subject to negative pressure wound therapy following trans-femoral amputation	Zeybek, B.; Li, S.; Fernandez, J. W.; Stapley, S.; Silberschmidt, V. V.; Liu, Y.	6	No	Biomechanics and Modeling in Mechanobiology	2017	Springer Nature	TRUE	journal-article		FALSE	publishedVersion	publisher	Yes	pubmedcentral.nih.gov dspace.lboro.ac.uk	2	FALSE	1617-7940	12 months embargo	cannot	green		0	https://doi.org/10.1007/s10237-017-0921-7					USD	3000	3000	Marie Sklodowska-Curie Research and Innovation Staff Exchange programme [FP7-PEOPLE-2012-IRSES 318553]; Loughborough University Wolfson School of Mechanical Electrical and Manufacturing Engineering	Biophysics; Engineering	No	FALSE	FALSE	FALSE	FALSE	FALSE	FALSE	FALSE	FALSE	FALSE	FALSE	FALSE	FALSE
10.1007/s10237-017-0923-5			closed	Determining skeletal muscle architecture with Laplacian simulations: a comparison with diffusion tensor imaging	Handsfield, Geoffrey G.; Bolsterlee, Bart; Inouye, Joshua M.; Herbert, Robert D.; Besier, Thor F.; Fernandez, Justin W.	6	No	Biomechanics and Modeling in Mechanobiology	2017	Springer Nature	FALSE	journal-article		FALSE			No		0	FALSE	1617-7940	12 months embargo	cannot	green		3						USD	3000	3000	Whitaker International Program; Wishbone Trust of the New Zealand Orthopaedic Association [Wishbone Trust 3710689]; NHMRC [APP1055084]	Biophysics; Engineering	Yes	FALSE	FALSE	FALSE	FALSE	FALSE	FALSE	FALSE	FALSE	FALSE	FALSE	FALSE	FALSE
10.1007/s10238-017-0453-6			closed	Associations between circulating levels of adipocytokines and abdominal adiposity in patients after acute pancreatitis	Singh, Ruma G.; Pendharkar, Sayali A.; Gillies, Nicola A.; Miranda-Soberanis, Victor; Plank, Lindsay D.; Petrov, Maxim S.	6	No	Clinical and Experimental Medicine	2017	Springer Nature	FALSE	journal-article		FALSE			No		0	FALSE	1591-9528	12 months embargo	cannot	green		15						USD	3000	3000	Health Research Council of New Zealand [15/035]	Research & Experimental Medicine	Yes	FALSE	TRUE	FALSE	FALSE	FALSE	FALSE	FALSE	TRUE	FALSE	FALSE	FALSE	FALSE
10.1007/s10344-017-1109-2			closed	Five-year population dynamics of plateau pikas (Ochotona curzoniae) on the east of Tibetan Plateau	Qu, Jiapeng; Russell, James C.; Ji, Weihong; Yang, Min; Chen, Qianquan; Li, Wenjing; Zhang, Yanming	7	No	European Journal of Wildlife Research	2017	Springer Nature	FALSE	journal-article		FALSE			No		0	FALSE	1439-0574	12 months embargo	cannot	green		4						USD	3000	3000	National Natural Science Foundation of China [31300320 31670394]; CAS Light of West China Program; Basic Research Program of Qinghai [2017-ZJ-761]; Chinese Academy of Sciences Fellowship for Young International Scientists; Construction Fund for Qinghai Key Laboratories [2017-ZJ-Y23]; Key Technology Research and Development Program of Qinghai Province [2015-SF-A4-2 2016-NK-148]; National Key Techn…	Environmental Sciences & Ecology; Zoology	No	FALSE	FALSE	FALSE	FALSE	FALSE	FALSE	FALSE	FALSE	FALSE	FALSE	FALSE	FALSE
10.1007/s10409-017-0642-2			closed	The energy transfer mechanism of a perturbed solid-body rotation flow in a rotating pipe	Feng, Chunjuan; Liu, Feng; Rusak, Zvi; Wang, Shixiao	4	No	Acta Mechanica Sinica	2017	Springer Nature	FALSE	journal-article		FALSE			No		0	FALSE	1614-3116	12 months embargo	cannot	green		1						USD	3000	3000	Young Scientists Fund of the National Natural Science Foundation of China [11601411]; Scientific Research Program - Shannxi Provincial Education Department [15JK1313]	Engineering; Mechanics	No	FALSE	FALSE	FALSE	FALSE	FALSE	FALSE	FALSE	FALSE	FALSE	FALSE	FALSE	FALSE
10.1007/s10456-017-9540-2	open (via page says license)	cc-by	hybrid	MCPIP1 contributes to clear cell renal cell carcinomas development	Ligeza, Janusz; Marona, Paulina; Gach, Natalia; Lipert, Barbara; Miekus, Katarzyna; Wilk, Waclaw; Jaszczynski, Janusz; Stelmach, Andrzej; Loboda, Agnieszka; Dulak, Jozef; Branicki, Wojciech; Rys, Janusz; Jura, Jolanta	13	No	Angiogenesis	2017	Springer Nature	TRUE	journal-article		FALSE	publishedVersion	publisher	Yes	pubmedcentral.nih.gov	1	FALSE	1573-7209	12 months embargo	cannot	green		24	https://doi.org/10.1007/s10456-017-9540-2					USD	3000	3000	National Science Centre [2011/03/B/NZ1/00023]; European Union; Polish Ministry of Science and Higher Education [POIG.02.01.00-12-064/08 02.02.00-00-014/08]; Ministry of Science and Higher Education	Cardiovascular System & Cardiology	No	FALSE	FALSE	FALSE	FALSE	FALSE	FALSE	FALSE	FALSE	FALSE	FALSE	FALSE	FALSE
10.1007/s10459-017-9763-4	open (via page says license)	cc-by	hybrid	Predictors of academic success for MÄori, Pacific and non-MÄori non-Pacific students in health professional education: a quantitative analysis	Wikaire, Erena; Curtis, Elana; Cormack, Donna; Jiang, Yannan; Mcmillan, Louise; Loto, Rob; Reid, Papaarangi	7	No	Advances in Health Sciences Education	2017	Springer Nature	TRUE	journal-article		FALSE	publishedVersion	publisher	No		0	FALSE	1573-1677	12 months embargo	cannot	green		4	https://doi.org/10.1007/s10459-017-9763-4					USD	3000	3000	Ministry of Education; Tuakana contestable fund; FMHS postgraduate student association; Ministry of Health (New Zealand) [414953/337535/00]	Education & Educational Research; Health Care Sciences & Services	Yes	FALSE	FALSE	FALSE	FALSE	FALSE	FALSE	FALSE	FALSE	FALSE	FALSE	FALSE	FALSE
10.1007/s10508-016-0857-5			closed	The Diversity and Prevalence of Sexual Orientation Self-Labels in a New Zealand National Sample	Greaves, Lara M.; Barlow, Fiona Kate; Lee, Carol H. J.; Matika, Correna M.; Wang, Weiyu; Lindsay, Cinnamon-Jo; Case, Claudia J. B.; Sengupta, Nikhil K.; Huang, Yanshu; Cowie, Lucy J.; Stronge, Samantha; Storey, Mary; De Souza, Lucy; Manuela, Sam; Hammond, Matthew D.; Milojev, Petar; Townrow, Carly S.; Muriwai, Emerald; Satherley, Nicole; Fraser, Gloria; West-Newman, Tim	26	Yes	Archives of Sexual Behavior	2017	Springer Nature	FALSE	journal-article		FALSE			No		0	FALSE	1573-2800	12 months embargo	cannot	green		14						USD	3000	3000	Templeton World Charity Foundation [0077]	Psychology; Social Sciences - Other Topics	Yes	FALSE	FALSE	FALSE	FALSE	FALSE	FALSE	FALSE	FALSE	FALSE	FALSE	FALSE	FALSE
10.1007/s10508-017-0977-6			closed	Asexual Identity in a New Zealand National Sample: Demographics, Well-Being, and Health	Greaves, Lara M.; Barlow, Fiona Kate; Huang, Yanshu; Stronge, Samantha; Fraser, Gloria; Sibley, Chris G.	6	No	Archives of Sexual Behavior	2017	Springer Nature	FALSE	journal-article		FALSE			No		0	FALSE	1573-2800	12 months embargo	cannot	green		6						USD	3000	3000	Templeton World Charity Foundation Grant [0077]	Psychology; Social Sciences - Other Topics	Yes	FALSE	FALSE	FALSE	FALSE	FALSE	FALSE	FALSE	FALSE	FALSE	FALSE	FALSE	FALSE
10.1007/s10508-017-1063-9			closed	Corrigendum to: The Diversity and Prevalence of Sexual Orientation Self-Labels in a New Zealand National Sample (Greaves et al., 2017)	Greaves, Lara M.; Barlow, Fiona Kate; Lee, Carol H. J.; Matika, Correna M.; Wang, Weiyu; Lindsay, Cinnamon-Jo; Case, Claudia J. B.; Sengupta, Nikhil K.; Huang, Yanshu; Cowie, Lucy J.; Stronge, Samantha; Storey, Mary; De Souza, Lucy; Manuela, Sam; Hammond, Matthew D.; Milojev, Petar; Townrow, Carly S.; Muriwai, Emerald; Satherley, Nicole; Fraser, Gloria; West-Newman, Tim	26	Yes	Archives of Sexual Behavior	2017	Springer Nature	FALSE	journal-article		FALSE			No		0	FALSE	1573-2800	12 months embargo	cannot	green		0						USD	3000	3000		Psychology; Social Sciences - Other Topics	Yes	FALSE	FALSE	FALSE	FALSE	FALSE	FALSE	FALSE	FALSE	FALSE	FALSE	FALSE	FALSE
10.1007/s10518-015-9772-8			closed	Understanding post-earthquake decisions on multi-storey concrete buildings in Christchurch, New Zealand	Marquis, Fr\\U00E9D\\U00E9Ric; Kim, Jenna Jihyun; Elwood, Kenneth J.; Chang, Stephanie E.	4	No	Bulletin of Earthquake Engineering	2017	Springer Nature	FALSE	journal-article		FALSE			No		0	FALSE	1573-1456	12 months embargo	cannot	green		16						USD	3000	3000	Natural Sciences and Engineering Research Council of Canada	Engineering; Geology	No	FALSE	FALSE	FALSE	FALSE	FALSE	FALSE	FALSE	FALSE	FALSE	FALSE	FALSE	FALSE
10.1007/s10530-016-1325-9	open (via page says license)	cc-by	hybrid	Global range expansion of pest Lepidoptera requires socially acceptable solutions	Suckling, D. M.; Conlong, D. E.; Carpenter, J. E.; Bloem, K. A.; Rendon, P.; Vreysen, M. J. B.	6	No	Biological Invasions	2017	Springer Nature	TRUE	journal-article		FALSE	publishedVersion	publisher	No		0	FALSE	1573-1464	12 months embargo	cannot	green		3	https://doi.org/10.1007/s10530-016-1325-9					USD	3000	3000	FAO/IAEA Division of Nuclear Techniques in Food and Agriculture; Global Eradication Database; Lloyd Stringer	Biodiversity & Conservation; Environmental Sciences & Ecology	No	FALSE	FALSE	FALSE	FALSE	FALSE	FALSE	FALSE	FALSE	FALSE	FALSE	FALSE	FALSE
10.1007/s10530-017-1388-2			closed	Rodent eradications as ecosystem experiments: a case study from the Mexican tropics	Samaniego-Herrera, Araceli; Clout, Mick N.; Aguirre-Mu\\U00F1Oz, Alfonso; Russell, James C.	4	No	Biological Invasions	2017	Springer Nature	FALSE	journal-article		FALSE			No		0	FALSE	1573-1464	12 months embargo	cannot	green		0						USD	3000	3000	U.S. Fish and Wildlife Service; National Fish and Wildlife Foundation; Packard Foundation; University of Auckland	Biodiversity & Conservation; Environmental Sciences & Ecology	Yes	FALSE	FALSE	FALSE	FALSE	FALSE	FALSE	FALSE	FALSE	FALSE	FALSE	FALSE	FALSE
10.1007/s10530-017-1446-9			closed	Prospects for domestic and feral cat management on an inhabited tropical island	Dias, Ricardo Augusto; Abrah\\U00E3O, Carlos Roberto; Micheletti, Tatiane; Mangini, Paulo Rog\\U00E9Rio; De Oliveira Gasparotto, Vin\\U00Edcius Peron; De Jesus Pena, Hilda F\\U00E1Tima; Ferreira, Fernando; Russell, James Charles; Silva, Jean Carlos Ramos	9	No	Biological Invasions	2017	Springer Nature	FALSE	journal-article		FALSE			No		0	FALSE	1573-1464	12 months embargo	cannot	green		3						USD	3000	3000	Fire Department of Fernando de Noronha Capes (PVE) [88881.065000/2014-1]	Biodiversity & Conservation; Environmental Sciences & Ecology	No	FALSE	FALSE	FALSE	FALSE	FALSE	FALSE	FALSE	FALSE	FALSE	FALSE	FALSE	FALSE
10.1007/s10530-017-1489-y			closed	Bilge water as a vector for the spread of marine pests: a morphological, metabarcoding and experimental assessment	Fletcher, Lauren M.; Zaiko, Anastasija; Atalah, Javier; Richter, Ingrid; Dufour, Celine M.; Pochon, Xavier; Wood, Susana A.; Hopkins, Grant A.	8	No	Biological Invasions	2017	Springer Nature	FALSE	journal-article		FALSE			No		0	FALSE	1573-1464	12 months embargo	cannot	green		9						USD	3000	3000	National Institute of Water and Atmospheric Research Ltd (NIWA) under Coasts and Oceans Research Programme 6 Marine Biosecurity [SCI 2014/15]	Biodiversity & Conservation; Environmental Sciences & Ecology	No	FALSE	FALSE	FALSE	FALSE	FALSE	FALSE	FALSE	FALSE	FALSE	FALSE	FALSE	FALSE
10.1007/s10531-017-1386-9			closed	An operational definition of essential biodiversity variables	Schmeller, Dirk S.; Mihoub, Jean-Baptiste; Bowser, Anne; Arvanitidis, Christos; Costello, Mark J.; Fernandez, Miguel; Geller, Gary N.; Hobern, Donald; Kissling, W. Daniel; Regan, Eugenie; Saarenmaa, Hannu; Turak, Eren; Isaac, Nick J. B.	13	No	Biodiversity and Conservation	2017	Springer Nature	FALSE	journal-article		FALSE			No		0	FALSE	1572-9710	12 months embargo	cannot	green		10						USD	3000	3000	EU BON project - European Union [308454]; LifeWatch Greece infrastructure [MIS 384676]; Greek Government under the General Secretariat of Research and Technology (GSRT); ESFRI; National Strategic Reference Framework (NSRF); GEO-BON Secretariat; Alfred P. Sloan Foundation; European Union [654003]	Biodiversity & Conservation; Environmental Sciences & Ecology	No	FALSE	FALSE	FALSE	FALSE	FALSE	FALSE	FALSE	FALSE	FALSE	FALSE	FALSE	FALSE
10.1007/s10531-017-1388-7	oa repository (via OAI-PMH title and first author match)		green	Building capacity in biodiversity monitoring at the global scale	Schmeller, Dirk S.; B\\U00F6Hm, Monika; Arvanitidis, Christos; Barber-Meyer, Shannon; Brummitt, Neil; Chandler, Mark; Chatzinikolaou, Eva; Costello, Mark J.; Ding, Hui; Garc\\U00Eda-Moreno, Jaime; Gill, Mike; Haase, Peter; Jones, Miranda; Juillard, Romain; Magnusson, William E.; Martin, Corinne S.; Mcgeoch, Melodie; Mihoub, Jean-Baptiste; Pettorelli, Nathalie; Proen\\U00E7A, V\\U00E2Nia; Peng, Cui	28	Yes	Biodiversity and Conservation	2017	Springer Nature	TRUE	journal-article		FALSE	submittedVersion	repository	Yes	eprints.ucl.ac.uk.OAI2	1	FALSE	1572-9710	12 months embargo	cannot	green		16	http://discovery.ucl.ac.uk/1558305/1/Bohm_Capacity_Building_JournalArticle_BiodivCons_v1_ACCEPTED.pdf					USD	3000	3000		Biodiversity & Conservation; Environmental Sciences & Ecology	No	FALSE	FALSE	FALSE	FALSE	FALSE	FALSE	FALSE	FALSE	FALSE	FALSE	FALSE	FALSE
10.1007/s10549-017-4295-4			closed	Influence of comorbidity on chemotherapy use for early breast cancer: systematic review and meta-analysis	Edwards, Melissa J.; Campbell, Ian D.; Lawrenson, Ross A.; Kuper-Hommel, Marion J.	4	No	Breast Cancer Research and Treatment	2017	Springer Nature	FALSE	journal-article		FALSE			No		0	FALSE	1573-7217	12 months embargo	cannot	green		3						USD	3000	3000	University of Auckland; Cancer Society of New Zealand (Training Scholarship in Cancer Research); Health Research Council (Clinical Research Training Scholarship) [17/016]; Waikato Breast Cancer Research Trust	Oncology	Yes	FALSE	FALSE	FALSE	FALSE	FALSE	FALSE	FALSE	FALSE	FALSE	FALSE	FALSE	FALSE
10.1007/s10552-017-0926-7	oa repository (via OAI-PMH title and first author match)		green	Associations between sun exposure and other lifestyle variables in Swedish women	Scragg, R.; Sandin, S.; L\\U00F6F, M.; Adami, H.-O.; Weiderpass, E.	5	No	Cancer Causes & Control	2017	Springer Nature	TRUE	journal-article		FALSE	submittedVersion	repository	Yes	munin.uit.no	1	FALSE	1573-7225	12 months embargo	cannot	green		1	https://munin.uit.no/bitstream/10037/12412/2/article.pdf					USD	3000	3000	Swedish Research Council [521-2011-2955]	Oncology; Public, Environmental & Occupational Health	Yes	FALSE	FALSE	FALSE	FALSE	FALSE	FALSE	FALSE	FALSE	FALSE	FALSE	FALSE	FALSE
10.1007/s10552-017-0969-9			closed	Treatment and survival disparities by ethnicity in New Zealand women with stage Iâ€“III breast cancer tumour subtypes	Lawrenson, Ross; Lao, Chunhuan; Campbell, Ian; Harvey, Vernon; Seneviratne, Sanjeewa; Edwards, Melissa; Elwood, Mark; Scott, Nina; Kidd, Jacquie; Sarfati, Diana; Kuper-Hommel, Marion	11	No	Cancer Causes & Control	2017	Springer Nature	FALSE	journal-article		FALSE			No		0	FALSE	1573-7225	12 months embargo	cannot	green		4						USD	3000	3000	Health Research Council of New Zealand	Oncology; Public, Environmental & Occupational Health	Yes	FALSE	TRUE	FALSE	FALSE	FALSE	FALSE	FALSE	TRUE	FALSE	FALSE	FALSE	FALSE
10.1007/s10554-016-0978-x			closed	Estimation of myocardial strain from non-rigid registration and highly accelerated cine CMR	Langton, Jonathan E. N.; Lam, Hoi-Ieng; Cowan, Brett R.; Occleshaw, Christopher J.; Gabriel, Ruvin; Lowe, Boris; Lydiard, Suzanne; Greiser, Andreas; Schmidt, Michaela; Young, Alistair A.	10	No	The International Journal of Cardiovascular Imaging	2017	Springer Nature	FALSE	journal-article		FALSE			No		0	FALSE	1573-0743	12 months embargo	cannot	green		1						USD	3000	3000	Siemens Healthcare GmbH; Health Research Council of New Zealand	Cardiovascular System & Cardiology; Radiology, Nuclear Medicine & Medical Imaging	Yes	FALSE	TRUE	FALSE	FALSE	FALSE	FALSE	FALSE	TRUE	FALSE	FALSE	FALSE	FALSE
10.1007/s10570-017-1506-4			closed	Predicting the cell-wall compositions of Pinus radiata (radiata pine) wood using ATR and transmission FTIR spectroscopies	Fahey, Leona M.; Nieuwoudt, Mich\\U00E9L K.; Harris, Philip J.	3	No	Cellulose	2017	Springer Nature	FALSE	journal-article		FALSE			No		0	FALSE	1572-882X	12 months embargo	cannot	green		4						USD	3000	3000	Ministry of Business Innovation and Employment [Compromised Wood Quality''] [PROJ-12401-PPS-UOC]	Materials Science; Polymer Science	Yes	FALSE	FALSE	FALSE	FALSE	FALSE	TRUE	FALSE	TRUE	FALSE	FALSE	FALSE	FALSE
10.1007/s10592-016-0916-4			closed	Population history and genetic bottlenecks in translocated Cook Strait giant weta, Deinacrida rugosa: recommendations for future conservation management	White, Daniel J.; Watts, Corinne; Allwood, Julia; Prada, Diana; Stringer, Ian; Thornburrow, Danny; Buckley, Thomas R.	7	No	Conservation Genetics	2017	Springer Nature	FALSE	journal-article		FALSE			No		0	FALSE	1572-9737	12 months embargo	cannot	green		0						USD	3000	3000	Ministry of Business Innovation and Employment		No	FALSE	FALSE	FALSE	FALSE	FALSE	TRUE	FALSE	TRUE	FALSE	FALSE	FALSE	FALSE
10.1007/s10612-016-9325-8			closed	Marginalised: An Insiderâ€™s View of the State, State Policies in New Zealand and Gang Formation	Andrae, Dominic; Mcintosh, Tracey; Coster, Stan	3	No	Critical Criminology	2017	Springer Nature	FALSE	journal-article		FALSE			No		0	FALSE	1572-9877	12 months embargo	cannot	green		6						USD	3000	3000		Criminology & Penology	Yes	FALSE	FALSE	FALSE	FALSE	FALSE	FALSE	FALSE	FALSE	FALSE	FALSE	FALSE	FALSE
10.1007/s10618-017-0524-z			closed	The best privacy defense is a good privacy offense: obfuscating a search engine userâ€™s profile	Wicker, J\\U00F6Rg; Kramer, Stefan	2	No	Data Mining and Knowledge Discovery	2017	Springer Nature	FALSE	journal-article		FALSE			No		0	FALSE	1573-756X	12 months embargo	cannot	green		0						USD	3000	3000		Computer Science	No	FALSE	FALSE	FALSE	FALSE	FALSE	FALSE	FALSE	FALSE	FALSE	FALSE	FALSE	FALSE
10.1007/s10620-017-4530-1			closed	Glucose Variability Measures as Predictors of Oral Feeding Intolerance in Acute Pancreatitis: A Prospective Pilot Study	Jivanji, Chirag J.; Asrani, Varsha M.; Pendharkar, Sayali A.; Bevan, Melody G.; Gillies, Nicola A.; Soo, Danielle H. E.; Singh, Ruma G.; Petrov, Maxim S.	8	No	Digestive Diseases and Sciences	2017	Springer Nature	FALSE	journal-article		FALSE			No		0	FALSE	1573-2568	12 months embargo	cannot	green		4						USD	3000	3000	Health Research Council of New Zealand [15/035]	Gastroenterology & Hepatology	Yes	FALSE	TRUE	FALSE	FALSE	FALSE	FALSE	FALSE	TRUE	FALSE	FALSE	FALSE	FALSE
10.1007/s10646-016-1756-1			closed	Assessment of cytotoxicity, genotoxicity and 7-ethoxyresorufin-O-deethylase (EROD) induction in sediment extracts from New Zealand urban estuaries	Heinrich, Patrick; Petschick, Lara L.; Northcott, Grant L.; Tremblay, Louis A.; Ataria, James M.; Braunbeck, Thomas	6	No	Ecotoxicology	2017	Springer Nature	FALSE	journal-article		FALSE			No		0	FALSE	1573-3017	12 months embargo	cannot	green		4						USD	3000	3000	New Zealand Ministry of Business Innovation and Employment (MBIE) TTW [C09X0801]; Royal Society of New Zealand International Mobility Fund (IMF) NZ-Germany Science and Technology Programme [FRG11-26]; German Federal Agency for Agriculture and Nutrition ('Bundesanstalt fur Landwirtschaft und Ernahrung' BLE) [530-06.01-NZL]	Environmental Sciences & Ecology; Toxicology	No	FALSE	FALSE	FALSE	FALSE	TRUE	TRUE	FALSE	TRUE	FALSE	FALSE	FALSE	FALSE
10.1007/s10652-017-9526-z	oa repository (via OAI-PMH title and first author match)		green	Physical and numerical modelling of tsunami generation by a moving obstacle at the bottom boundary	Whittaker, C. N.; Nokes, R. I.; Lo, H.-Y.; Liu, P. L.-F.; Davidson, M. J.	5	No	Environmental Fluid Mechanics	2017	Springer Nature	TRUE	journal-article		FALSE	submittedVersion	repository	Yes	ir.canterbury.ac.nz	1	FALSE	1573-1510	12 months embargo	cannot	green		0	https://ir.canterbury.ac.nz/bitstream/10092/14657/3/WhittakerNokeLoLiu.pdf					USD	3000	3000		Environmental Sciences & Ecology; Mechanics; Meteorology & Atmospheric Sciences; Oceanography; Water Resources	Yes	TRUE	FALSE	FALSE	FALSE	FALSE	FALSE	FALSE	FALSE	FALSE	FALSE	FALSE	FALSE
10.1007/s10659-017-9640-7			closed	Modelling Cardiac Tissue Growth and Remodelling	Wang, Vicky Y.; Hussan, Jagir R.; Yousefi, Hashem; Bradley, Chris P.; Hunter, Peter J.; Nash, Martyn P.	6	No	Journal of Elasticity	2017	Springer Nature	FALSE	journal-article		FALSE			No		0	FALSE	1573-2681	12 months embargo	cannot	green		6						USD	3000	3000	New Zealand Government from the Marsden Fund [12-UOA-222]; Health Research Council of New Zealand [13-317]; MedTech Centre of Research Excellence; Marsden Grant 'How does the heart grow?' - Royal Society of New Zealand	Engineering; Materials Science; Mechanics	Yes	FALSE	TRUE	FALSE	TRUE	TRUE	FALSE	FALSE	TRUE	FALSE	FALSE	FALSE	FALSE
10.1007/s10661-017-6317-4	oa repository (via OAI-PMH title and first author match)		green	Long-term environmental monitoring for assessment of change: measurement inconsistencies over time and potential solutions	Ellingsen, Kari E.; Yoccoz, Nigel G.; Tveraa, Torkild; Hewitt, Judi E.; Thrush, Simon F.	5	No	Environmental Monitoring and Assessment	2017	Springer Nature	TRUE	journal-article		FALSE	submittedVersion	repository	Yes	munin.uit.no	1	FALSE	1573-2959	12 months embargo	cannot	green		4	https://munin.uit.no/bitstream/10037/12278/3/article.pdf					USD	3000	3000	Norwegian Oil and Gas Association [20-2013]; Norwegian Environment Agency [1204110 4013045]; Norwegian Research Council [212135]; Norwegian Institute for Nature Research (NINA); NINA	Environmental Sciences & Ecology	No	FALSE	FALSE	FALSE	FALSE	FALSE	FALSE	FALSE	FALSE	FALSE	FALSE	FALSE	FALSE
10.1007/s10664-017-9505-5	open (via free pdf)		bronze	Guest editorial for special section on success and failure in software engineering	M\\U00E4Ntyl\\U00E4, Mika V.; J\\U00F8Rgensen, Magne; Ralph, Paul; Erdogmus, Hakan	4	No	Empirical Software Engineering	2017	Springer Nature	TRUE	journal-article		FALSE	publishedVersion	publisher	No		0	FALSE	1573-7616	12 months embargo	cannot	green		1	https://link.springer.com/content/pdf/10.1007%2Fs10664-017-9505-5.pdf					USD	3000	3000		Computer Science	No	FALSE	FALSE	FALSE	FALSE	FALSE	FALSE	FALSE	FALSE	FALSE	FALSE	FALSE	FALSE
10.1007/s10677-017-9816-z			closed	Resentment of Advice and Norms of Advice	Jonas, Monique	1	No	Ethical Theory and Moral Practice	2017	Springer Nature	FALSE	journal-article		FALSE			No		0	FALSE	1572-8447	12 months embargo	cannot	green		0						USD	3000	3000		Philosophy	Yes	FALSE	FALSE	FALSE	FALSE	FALSE	FALSE	FALSE	FALSE	FALSE	FALSE	FALSE	FALSE
10.1007/s10691-017-9349-9			closed	Custody Stalking: A Mechanism of Coercively Controlling Mothers Following Separation	Elizabeth, Vivienne	1	No	Feminist Legal Studies	2017	Springer Nature	FALSE	journal-article		FALSE			No		0	FALSE	1572-8455	12 months embargo	cannot	green		4						USD	3000	3000		Government & Law; Women's Studies	Yes	FALSE	FALSE	FALSE	FALSE	FALSE	FALSE	FALSE	FALSE	FALSE	FALSE	FALSE	FALSE
10.1007/s10712-017-9442-2			closed	Shallow Circulations: Relevance and Strategies for Satellite Observation	Bellon, Gilles; Reitebuch, Oliver; Naumann, Ann Kristin	3	No	Surveys in Geophysics	2017	Springer Nature	FALSE	journal-article		FALSE			No		0	FALSE	1573-0956	12 months embargo	cannot	green		2						USD	3000	3000	Pacific Fund grant Pluvar; Hans-Ertel Centre for Weather Research; Federal Ministry of Transport and Digital Infrastructure (BMVI)	Geochemistry & Geophysics	Yes	FALSE	FALSE	FALSE	FALSE	FALSE	FALSE	FALSE	FALSE	FALSE	FALSE	FALSE	FALSE
10.1007/s10729-016-9368-0	oa repository (via OAI-PMH title and first author match)		green	Dynamic ambulance dispatching: is the closest-idle policy always optimal?	Jagtenberg, C. J.; Bhulai, S.; Van Der Mei, R. D.	3	No	Health Care Management Science	2017	Springer Nature	TRUE	journal-article		FALSE	publishedVersion	repository	Yes	cwi.nl	1	FALSE	1572-9389	12 months embargo	cannot	green		2	https://ir.cwi.nl/pub/24632/art-3A10.1007-2Fs10729-016-9368-0.pdf					USD	3000	3000	Technology Foundation STW [11986]	Health Care Sciences & Services	No	FALSE	FALSE	FALSE	FALSE	FALSE	FALSE	FALSE	FALSE	FALSE	FALSE	FALSE	FALSE
10.1007/s10766-016-0474-x			closed	Supporting Enhanced Exception Handling with OpenMP in Object-Oriented Languages	Fan, Xing; Mehrabi, Mostafa; Sinnen, Oliver; Giacaman, Nasser	4	No	International Journal of Parallel Programming	2017	Springer Nature	FALSE	journal-article		FALSE			No		0	FALSE	1573-7640	12 months embargo	cannot	green		0						USD	3000	3000		Computer Science	Yes	FALSE	FALSE	FALSE	FALSE	FALSE	FALSE	FALSE	FALSE	FALSE	FALSE	FALSE	FALSE
10.1007/s10802-016-0176-2			closed	Psychometric Properties and Normative Data for the Preschool Strengths and Difficulties Questionnaire in Two-Year-Old Children	D\\U2019Souza, Stephanie; Waldie, Karen E; Peterson, Elizabeth R.; Underwood, Lisa; Morton, Susan M. B.	5	No	Journal of Abnormal Child Psychology	2017	Springer Nature	FALSE	journal-article		FALSE			No		0	FALSE	1573-2835	12 months embargo	cannot	green		14						USD	3000	3000	New Zealand Ministries of Social Development Health Education Justice and Pacific Island Affairs Ministry of Business Innovation and Employment; Ministry for Women; Department of Corrections; Social Policy Evaluation and Research Unit; Te Puni Kokiri; New Zealand Police; Sport New Zealand; Housing New Zealand Corporation; Mental Health Commission; University of Auckland; Auckland UniServices Limi…	Psychology	Yes	FALSE	TRUE	FALSE	FALSE	FALSE	TRUE	FALSE	TRUE	FALSE	FALSE	FALSE	FALSE
10.1007/s10811-017-1147-x	open (via free pdf)		bronze	Erratum to: Carbon dioxide mitigation potential of seaweed aquaculture beds (SABs)	Sondak, Calvyn F. A.; Ang, Put O.; Beardall, John; Bellgrove, Alecia; Boo, Sung Min; Gerung, Grevo S.; Hepburn, Christopher D.; Hong, Dang Diem; Hu, Zhengyu; Kawai, Hiroshi; Largo, Danilo; Lee, Jin Ae; Lim, Phaik-Eem; Mayakun, Jaruwan; Nelson, Wendy A.; Oak, Jung Hyun; Phang, Siew-Moi; Sahoo, Dinabandhu; Peerapornpis, Yuwadee; Yang, Yufeng; Chung, Ik Kyo	21	Yes	Journal of Applied Phycology	2017	Springer Nature	TRUE	journal-article		FALSE	publishedVersion	publisher	No		0	FALSE	1573-5176	12 months embargo	cannot	green		4	https://link.springer.com/content/pdf/10.1007%2Fs10811-017-1147-x.pdf					USD	3000	3000		Biotechnology & Applied Microbiology; Marine & Freshwater Biology	No	FALSE	FALSE	FALSE	FALSE	FALSE	FALSE	FALSE	FALSE	FALSE	FALSE	FALSE	FALSE
10.1007/s10816-016-9297-8	oa repository (via OAI-PMH title and first author match)		green	Major Fallacies Surrounding Stone Artifacts and Assemblages	Dibble, Harold L.; Holdaway, Simon J.; Lin, Sam C.; Braun, David R.; Douglass, Matthew J.; Iovita, Radu; Mcpherron, Shannon P.; Olszewski, Deborah I.; Sandgathe, Dennis	9	No	Journal of Archaeological Method and Theory	2017	Springer Nature	TRUE	journal-article		FALSE	publishedVersion	repository	Yes	digitalcommons.unl.edu	1	FALSE	1573-7764	12 months embargo	cannot	green		18	http://digitalcommons.unl.edu/cgi/viewcontent.cgi?article=1151&context=anthropologyfacpub					USD	3000	3000		Anthropology; Archaeology	No	FALSE	FALSE	FALSE	FALSE	FALSE	FALSE	FALSE	FALSE	FALSE	FALSE	FALSE	FALSE
10.1007/s10823-017-9324-6			closed	Ethnic and Gender Differences in Preferred Activities among MÄori and non-MÄori of Advanced age in New Zealand	Wright-St Clair, Valerie A.; Rapson, Angela; Kepa, Mere; Connolly, Martin; Keeling, Sally; Rolleston, Anna; Teh, Ruth; Broad, Joanna B.; Dyall, Lorna; Jatrana, Santosh; Wiles, Janine; Pillai, Avinesh; Garrett, Nick; Kerse, Ngaire	14	No	Journal of Cross-Cultural Gerontology	2017	Springer Nature	FALSE	journal-article		FALSE			No		0	FALSE	1573-0719	12 months embargo	cannot	green		1						USD	3000	3000	Health Research Council of New Zealand (HRC); Nga Pae o te Maramatanga New Zealand's Maori Centre of Research Excellence; Active Ageing Research Group Auckland University of Technology	Geriatrics & Gerontology	Yes	FALSE	TRUE	FALSE	FALSE	FALSE	FALSE	FALSE	TRUE	FALSE	FALSE	FALSE	FALSE
10.1007/s10846-016-0456-7			closed	Development of Wearable Wrist and Forearm Exoskeleton with Shape Memory Alloy Actuators	Hope, James; Mcdaid, Andrew	2	No	Journal of Intelligent & Robotic Systems	2017	Springer Nature	FALSE	journal-article		FALSE			No		0	FALSE	1573-0409	12 months embargo	cannot	green		3						USD	3000	3000		Computer Science; Robotics	Yes	FALSE	FALSE	FALSE	FALSE	FALSE	FALSE	FALSE	FALSE	FALSE	FALSE	FALSE	FALSE
10.1007/s10865-017-9852-0	oa repository (via OAI-PMH title and first author match)	cc-by	green	Greater ability to express positive emotion is associated with lower projected cardiovascular disease risk	Tuck, Natalie L.; Adams, Kathryn S.; Pressman, Sarah D.; Consedine, Nathan S.	4	No	Journal of Behavioral Medicine	2017	Springer Nature	TRUE	journal-article		FALSE	publishedVersion	repository	Yes	escholarship.org	1	FALSE	1573-3521	12 months embargo	cannot	green		2	https://cloudfront.escholarship.org/dist/prd/content/qt28n486fh/qt28n486fh.pdf?t=oubuve					USD	3000	3000	University of Auckland Doctoral Research Fund; University of Auckland Post Graduate Research Fund; University of Auckland Summer Studentship Fund	Psychology	Yes	FALSE	FALSE	FALSE	FALSE	FALSE	FALSE	FALSE	FALSE	FALSE	FALSE	FALSE	FALSE
10.1007/s10877-016-9911-z			closed	Electromyographic activation reveals cortical and sub-cortical dissociation during emergence from general anesthesia	Hight, Darren F.; Voss, Logan J.; Garc\\U00Eda, Paul S.; Sleigh, Jamie W.	4	No	Journal of Clinical Monitoring and Computing	2017	Springer Nature	FALSE	journal-article		FALSE			No		0	FALSE	1573-2614	12 months embargo	cannot	green		3						USD	3000	3000	James S. McDonnell Foundation [220020346]	Anesthesiology	Yes	FALSE	FALSE	FALSE	FALSE	FALSE	FALSE	FALSE	FALSE	FALSE	FALSE	FALSE	FALSE
10.1007/s10886-017-0847-7			closed	Caterpillar-Induced Plant Volatiles Attract Adult Tortricidae	Suckling, D. M.; El-Sayed, A. M.	2	No	Journal of Chemical Ecology	2017	Springer Nature	FALSE	journal-article		FALSE			No		0	FALSE	1573-1561	12 months embargo	cannot	green		2						USD	3000	3000	New Zealand Institute for Plant Food Research; Ministry of Business Innovation and Employment; Washington Tree Fruit Research Commission Wenatchee WA USA; OECD Co-operative Research Programme: Biological Resource Management for Sustainable Agricultural Systems	Biochemistry & Molecular Biology; Environmental Sciences & Ecology	Yes	FALSE	FALSE	FALSE	FALSE	FALSE	TRUE	FALSE	TRUE	FALSE	FALSE	FALSE	FALSE
10.1007/s10899-016-9638-2			closed	Improved Outcomes Following a Single Session Web-Based Intervention for Problem Gambling	Rodda, S. N.; Lubman, D. I.; Jackson, A. C.; Dowling, N. A.	4	No	Journal of Gambling Studies	2017	Springer Nature	FALSE	journal-article		FALSE			No		0	FALSE	1573-3602	12 months embargo	cannot	green		4					3000	USD	3000	3000	Gambling Help Online; Victorian Responsible Gambling Foundation	Substance Abuse; Psychology	No	FALSE	FALSE	FALSE	FALSE	FALSE	FALSE	FALSE	FALSE	FALSE	FALSE	FALSE	FALSE
10.1007/s10901-016-9512-7			closed	Housing price and transaction intensity correlation in Hong Kong: implications for government housing policy	Li, Ling Hin; Cheung, Ka Shing	2	No	Journal of Housing and the Built Environment	2017	Springer Nature	FALSE	journal-article		FALSE			No		0	FALSE	1573-7772	12 months embargo	cannot	green		0						USD	3000	3000		Environmental Sciences & Ecology; Public Administration; Urban Studies	No	FALSE	FALSE	FALSE	FALSE	FALSE	FALSE	FALSE	FALSE	FALSE	FALSE	FALSE	FALSE
10.1007/s10903-016-0530-z	oa repository (via OAI-PMH title and first author match)		green	Mental Health Status of Double Minority Adolescents: Findings from National Cross-Sectional Health Surveys	Chiang, Szu-Ying; Fleming, Theresa; Lucassen, Mathijs; Fenaughty, John; Clark, Terryann; Denny, Simon	6	No	Journal of Immigrant and Minority Health	2017	Springer Nature	TRUE	journal-article		FALSE	submittedVersion	repository	Yes	oro.open.ac.uk	1	FALSE	1557-1920	12 months embargo	cannot	green		4	http://oro.open.ac.uk/47865/10/Double%20Minority%20Manuscript%20For%20JIMH%2001-09-16_Accepted%20manuscript%20for%20ORO.pdf					USD	3000	3000	University of Auckland; Ministry of Youth Development; Ministry of Social Development; Ministry of Justice; Ministry of Health; Families Commission; Health Promotion Agency; Health Research Council of New Zealand; Department of Labour; Accident Corporation of New Zealand; Sport and Recreation New Zealand; Alcohol Advisory Council of New Zealand	Public, Environmental & Occupational Health	Yes	FALSE	TRUE	FALSE	FALSE	FALSE	FALSE	FALSE	TRUE	FALSE	FALSE	FALSE	FALSE
10.1007/s10911-017-9375-x			closed	Variation of Human Milk Glucocorticoids over 24Â hour Period	Pundir, Shikha; Wall, Clare R.; Mitchell, Cameron J.; Thorstensen, Eric B.; Lai, Ching T.; Geddes, Donna T.; Cameron-Smith, David	7	No	Journal of Mammary Gland Biology and Neoplasia	2017	Springer Nature	FALSE	journal-article		FALSE			No		0	FALSE	1573-7039	12 months embargo	cannot	green		11						USD	3000	3000	Liggins Institute; University of Auckland; Philanthropic trust; Riddet Institute; Massey University	Oncology; Endocrinology & Metabolism; Physiology	Yes	FALSE	FALSE	FALSE	FALSE	FALSE	FALSE	FALSE	FALSE	FALSE	FALSE	FALSE	FALSE
10.1007/s10912-017-9500-2			closed	The Beauty in Perfect Imperfection	Buetow, Stephen; Wallis, Katharine	2	No	Journal of Medical Humanities	2017	Springer Nature	FALSE	journal-article		FALSE			No		0	FALSE	1573-3645	12 months embargo	cannot	green		4						USD	3000	3000			Yes	FALSE	FALSE	FALSE	FALSE	FALSE	FALSE	FALSE	FALSE	FALSE	FALSE	FALSE	FALSE
10.1007/s10916-017-0711-x			closed	A Literature Review on Validated Simulations of the Surgical Services	Soh, K. W.; Walker, C.; O\\U2019Sullivan, M.	3	No	Journal of Medical Systems	2017	Springer Nature	FALSE	journal-article		FALSE			No		0	FALSE	1573-689X	12 months embargo	cannot	green		2						USD	3000	3000		Health Care Sciences & Services; Medical Informatics	Yes	FALSE	FALSE	FALSE	FALSE	FALSE	FALSE	FALSE	FALSE	FALSE	FALSE	FALSE	FALSE
10.1007/s10964-017-0640-5			closed	Engagement and Mentor Support as Drivers of Social Development in the Project K Youth Development Program	Chapman, Cassandra M.; Deane, Kelsey L.; Harr\\U00E9, Niki; Courtney, Matthew G. R.; Moore, Julie	5	No	Journal of Youth and Adolescence	2017	Springer Nature	FALSE	journal-article		FALSE			No		0	FALSE	1573-6601	12 months embargo	cannot	green		3						USD	3000	3000	Graeme Dingle Foundation	Psychology	No	FALSE	FALSE	FALSE	FALSE	FALSE	FALSE	FALSE	FALSE	FALSE	FALSE	FALSE	FALSE
10.1007/s10995-016-2191-x			closed	A Longitudinal Study of Pre-pregnancy and Pregnancy Risk Factors Associated with Antenatal and Postnatal Symptoms of Depression: Evidence from Growing Up in New Zealand	Underwood, Lisa; Waldie, Karen E.; D\\U2019Souza, Stephanie; Peterson, Elizabeth R.; Morton, Susan M. B.	5	No	Maternal and Child Health Journal	2017	Springer Nature	FALSE	journal-article		FALSE			No		0	FALSE	1573-6628	12 months embargo	cannot	green		12						USD	3000	3000	New Zealand Ministry of Social Development; New Zealand Ministry of Health; New Zealand Ministry of Education; New Zealand Ministry of Justice; New Zealand Ministry of Pacific Island Affairs; Department of Corrections; Social Policy Evaluation and Research Unit; Ministry of Business Innovation and Employment	Public, Environmental & Occupational Health	Yes	FALSE	FALSE	FALSE	FALSE	FALSE	TRUE	FALSE	TRUE	FALSE	FALSE	FALSE	FALSE
10.1007/s10995-017-2303-2	oa repository (via OAI-PMH title and first author match)		green	Exercise to Support Indigenous Pregnant Women to Stop Smoking: Acceptability to MÄori	Roberts, Vaughan; Glover, Marewa; Mccowan, Lesley; Walker, Natalie; Ussher, Michael; Heke, Ihirangi; Maddison, Ralph	7	No	Maternal and Child Health Journal	2017	Springer Nature	TRUE	journal-article		FALSE	submittedVersion	repository	Yes	openaccess.sgul.ac.uk	1	FALSE	1573-6628	12 months embargo	cannot	green		0	http://openaccess.sgul.ac.uk/108948/1/Vaughan%20et%20al%202017.pdf					USD	3000	3000	Health Research Council of New Zealand (HRC) [12/683]	Public, Environmental & Occupational Health	Yes	FALSE	TRUE	FALSE	FALSE	FALSE	FALSE	FALSE	TRUE	FALSE	FALSE	FALSE	FALSE
10.1007/s11033-017-4121-4			closed	Segregation of aÂ novel p.(Ser270Tyr) MAF mutation and p.(Tyr56âˆ—) CRYGD variant in a family with dominantly inherited congenital cataracts	Dudakova, Lubica; Stranecky, Viktor; Ulmanova, Olga; Hlavova, Eva; Trkov\\U00E1, Marie; Vincent, Andrea L.; Liskova, Petra	7	No	Molecular Biology Reports	2017	Springer Nature	FALSE	journal-article		FALSE			No		0	FALSE	1573-4978	12 months embargo	cannot	green		2						USD	3000	3000	Charles University institutional programs [UNCE 204011 PROGRES-Q26/LF1]; Ministry of Health of the Czech Republic [15-28208A 17-30500A]; Ministry of Education of the Czech Republic [LQ1604 NPU II]; National Center for Medical Genomics [LM2015091 CZ.02.1.01/0.0/0.0/16_013/0001634]	Biochemistry & Molecular Biology	No	FALSE	FALSE	FALSE	FALSE	FALSE	FALSE	FALSE	FALSE	FALSE	FALSE	FALSE	FALSE
10.1007/s11033-017-4130-3	open (via free pdf)		bronze	Correction to: Segregation of a novel p.(Ser270Tyr) MAF mutation and p.(Tyr56*) CRYGD variant in a family with dominantly inherited congenital cataracts	Dudakova, Lubica; Stranecky, Viktor; Ulmanova, Olga; Hlavova, Eva; Trkov\\U00E1, Marie; Vincent, Andrea L.; Liskova, Petra	7	No	Molecular Biology Reports	2017	Springer Nature	TRUE	journal-article		FALSE	publishedVersion	publisher	No		0	FALSE	1573-4978	12 months embargo	cannot	green		0	https://link.springer.com/content/pdf/10.1007%2Fs11033-017-4130-3.pdf					USD	3000	3000		Biochemistry & Molecular Biology	No	FALSE	FALSE	FALSE	FALSE	FALSE	FALSE	FALSE	FALSE	FALSE	FALSE	FALSE	FALSE
10.1007/s11049-017-9367-y			closed	Non-adjacent reduplication requires spellout in parallel	Brown, Jason	1	No	Natural Language & Linguistic Theory	2017	Springer Nature	FALSE	journal-article		FALSE			No		0	FALSE	1573-0859	12 months embargo	cannot	green		0						USD	3000	3000		Linguistics	Yes	FALSE	FALSE	FALSE	FALSE	FALSE	FALSE	FALSE	FALSE	FALSE	FALSE	FALSE	FALSE
10.1007/s11069-016-2672-7			closed	Quantifying risk to agriculture from volcanic ashfall: a case study from the Bay of Plenty, New Zealand	Thompson, Mary Anne; Lindsay, Jan M.; Wilson, Thomas M.; Biass, Sebastien; Sandri, Laura	5	No	Natural Hazards	2017	Springer Nature	FALSE	journal-article		FALSE			No		0	FALSE	1573-0840	12 months embargo	cannot	green		1						USD	3000	3000	University of Auckland; DEVORA Project; New Zealand Earthquake Commission; Natural Hazard Research Platform [C05X0804]	Geology; Meteorology & Atmospheric Sciences; Water Resources	Yes	FALSE	FALSE	FALSE	FALSE	FALSE	FALSE	FALSE	FALSE	FALSE	FALSE	FALSE	FALSE
10.1007/s11071-017-3786-5			closed	Characterizing regions of attraction for piecewise affine systems by continuity of discrete transition functions	Chen, Yu; Sun, Yue; Tang, Chun-Sen; Su, Yu-Gang; Hu, Aiguo Patrick	5	No	Nonlinear Dynamics	2017	Springer Nature	FALSE	journal-article		FALSE			No		0	FALSE	1573-269X	12 months embargo	cannot	green		1						USD	3000	3000	National Natural Science Foundation of China [61573074 51277192 51477020]; National High-Tech R and D Program of China [2015AA010402]	Engineering; Mechanics	No	FALSE	FALSE	FALSE	FALSE	FALSE	FALSE	FALSE	FALSE	FALSE	FALSE	FALSE	FALSE
10.1007/s11095-017-2225-0			closed	Chitooligosaccharides Modified Reduction-Sensitive Liposomes: Enhanced Cytoplasmic Drug Delivery and Osteosarcomas-Tumor Inhibition in Animal Models	Yin, Xuelei; Chi, Yingying; Guo, Chuanyou; Feng, Shuaishuai; Liu, Jinhu; Sun, Kaoxiang; Wu, Zimei	7	No	Pharmaceutical Research	2017	Springer Nature	FALSE	journal-article		FALSE			No		0	FALSE	1573-904X	can	cannot	green		5						USD	3000	3000	Taishan Scholar Project; Shandong Province China	Chemistry; Pharmacology & Pharmacy	Yes	FALSE	FALSE	FALSE	FALSE	FALSE	FALSE	FALSE	FALSE	FALSE	FALSE	FALSE	FALSE
10.1007/s11096-017-0469-8			closed	Utilization of simulated patients to assess diabetes and asthma counseling practices among community pharmacists in Qatar	Paravattil, Bridget; Kheir, Nadir; Yousif, Adil	3	No	International Journal of Clinical Pharmacy	2017	Springer Nature	FALSE	journal-article		FALSE			No		0	FALSE	2210-7711	12 months embargo	cannot	green		3						USD	3000	3000	Qatar National Research Fund (a member of The Qatar Foundation) [NPRP 4-254-3-080]	Pharmacology & Pharmacy	No	FALSE	FALSE	FALSE	FALSE	FALSE	FALSE	FALSE	FALSE	FALSE	FALSE	FALSE	FALSE
10.1007/s11096-017-0477-8			closed	An evaluation of the translation of continuing education into diabetes public health care by pharmacists	Wilbur, Kerry; Shabana, Sara; Maraghi, Fatima; Elmubark, Alaa; Kheir, Nadir	5	No	International Journal of Clinical Pharmacy	2017	Springer Nature	FALSE	journal-article		FALSE			No		0	FALSE	2210-7711	12 months embargo	cannot	green		1						USD	3000	3000	Qatar National Research Fund (QNRF a member of the Qatar Foundation) [UREP-17]	Pharmacology & Pharmacy	No	FALSE	FALSE	FALSE	FALSE	FALSE	FALSE	FALSE	FALSE	FALSE	FALSE	FALSE	FALSE
10.1007/s11096-017-0551-2	open (via page says license)	cc-by	hybrid	Pharmacistsâ€™ confidence when providing pharmaceutical care on anticoagulants, a multinational survey	Papastergiou, John; Kheir, Nadir; Ladova, Katerina; Rydant, Silas; De Rango, Fabio; Antoniou, Sotiris; Viola, Reka; Murillo, Maria Dolores; Steurbaut, Stephane; Da Costa, Filipa Alves	10	No	International Journal of Clinical Pharmacy	2017	Springer Nature	TRUE	journal-article		FALSE	publishedVersion	publisher	Yes	pubmedcentral.nih.gov comum.rcaap.pt	2	FALSE	2210-7711	12 months embargo	cannot	green		1	https://doi.org/10.1007/s11096-017-0551-2					USD	3000	3000	Davie-Ratnoff-Macfarlane (DRM) foundation	Pharmacology & Pharmacy	No	FALSE	FALSE	FALSE	FALSE	FALSE	FALSE	FALSE	FALSE	FALSE	FALSE	FALSE	FALSE
10.1007/s11104-017-3386-7	open (via free pdf)		bronze	Soil or fire: what causes treeless sedgelands in Tasmanian wet forests?	Bowman, David M. J. S.; Perry, George L. W.	2	No	Plant and Soil	2017	Springer Nature	TRUE	journal-article		FALSE	publishedVersion	publisher	No		0	FALSE	1573-5036	12 months embargo	cannot	green		3	https://link.springer.com/content/pdf/10.1007%2Fs11104-017-3386-7.pdf					USD	3000	3000	University of Tasmania	Agriculture; Plant Sciences	No	FALSE	FALSE	FALSE	FALSE	FALSE	FALSE	FALSE	FALSE	FALSE	FALSE	FALSE	FALSE
10.1007/s11145-017-9737-1			closed	Practices of effective writing teachers	Gadd, Murray; Parr, Judy M.	2	No	Reading and Writing	2017	Springer Nature	FALSE	journal-article		FALSE			No		0	FALSE	1573-0905	12 months embargo	cannot	green		3						USD	3000	3000		Education & Educational Research; Psychology	Yes	FALSE	FALSE	FALSE	FALSE	FALSE	FALSE	FALSE	FALSE	FALSE	FALSE	FALSE	FALSE
10.1007/s11199-017-0752-0			closed	Personality across Sexual Identity and Gender in a National Probability Sample in New Zealand	Greaves, Lara M.; Barlow, Fiona Kate; Huang, Yanshu; Stronge, Samantha; Sibley, Chris G.	5	No	Sex Roles	2017	Springer Nature	FALSE	journal-article		FALSE			No		0	FALSE	1573-2762	12 months embargo	cannot	green		1						USD	3000	3000	University of Auckland Doctoral Scholarship; Templeton World Charity Foundation Grant [0077]	Psychology; Women's Studies	Yes	FALSE	FALSE	FALSE	FALSE	FALSE	FALSE	FALSE	FALSE	FALSE	FALSE	FALSE	FALSE
10.1007/s11205-016-1367-5			closed	Cultural Connection Predicts Perceptions of Financial Security for MÄori	Houkamau, Carla A.; Sibley, Chris G.	2	No	Social Indicators Research	2017	Springer Nature	FALSE	journal-article		FALSE			No		0	FALSE	1573-0921	12 months embargo	cannot	green		1						USD	3000	3000		Social Sciences - Other Topics; Sociology	Yes	FALSE	FALSE	FALSE	FALSE	FALSE	FALSE	FALSE	FALSE	FALSE	FALSE	FALSE	FALSE
10.1007/s11245-016-9394-z			closed	The Divine Attributes and Non-personal Conceptions of God	Bishop, John; Perszyk, Ken	2	No	Topoi	2017	Springer Nature	FALSE	journal-article		FALSE			No		0	FALSE	1572-8749	12 months embargo	cannot	green		0						USD	3000	3000		Philosophy	Yes	FALSE	FALSE	FALSE	FALSE	FALSE	FALSE	FALSE	FALSE	FALSE	FALSE	FALSE	FALSE
10.1007/s11252-016-0627-0			closed	Photosynthetic CO2 uptake and carbon sequestration potential of deciduous and evergreen tree species in an urban environment	Weissert, L. F.; Salmond, J. A.; Schwendenmann, L.	3	No	Urban Ecosystems	2017	Springer Nature	FALSE	journal-article		FALSE			No		0	FALSE	1573-1642	12 months embargo	cannot	green		2						USD	3000	3000		Biodiversity & Conservation; Environmental Sciences & Ecology; Urban Studies	Yes	FALSE	FALSE	FALSE	FALSE	FALSE	FALSE	FALSE	FALSE	FALSE	FALSE	FALSE	FALSE
10.1007/s11269-017-1635-4			closed	A Multi-Scale Analysis of Single-Unit Housing Water Demand Through Integration of Water Consumption, Land Use and Demographic Data	Ghavidelfar, Saeed; Shamseldin, Asaad Y.; Melville, Bruce W.	3	No	Water Resources Management	2017	Springer Nature	FALSE	journal-article		FALSE			No		0	FALSE	1573-1650	12 months embargo	cannot	green		3						USD	3000	3000	Watercare Services Limited	Engineering; Water Resources	Yes	FALSE	FALSE	FALSE	FALSE	FALSE	FALSE	FALSE	FALSE	FALSE	FALSE	FALSE	FALSE
10.1007/s11274-017-2282-x			closed	Mini-review: high rate algal ponds, flexible systems for sustainable wastewater treatment	Young, P.; Taylor, M.; Fallowfield, H. J.	3	No	World Journal of Microbiology and Biotechnology	2017	Springer Nature	FALSE	journal-article		FALSE			No		0	FALSE	1573-0972	12 months embargo	cannot	green		13						USD	3000	3000		Biotechnology & Applied Microbiology	No	FALSE	FALSE	FALSE	FALSE	FALSE	FALSE	FALSE	FALSE	FALSE	FALSE	FALSE	FALSE
10.1007/s11276-016-1196-0			closed	Bit error rate performance analysis in amplify-and-forward relay networks	Khalil, Muhammad I.; Berber, Stevan M.; Sowerby, Kevin W.	3	No	Wireless Networks	2017	Springer Nature	FALSE	journal-article		FALSE			No		0	FALSE	1572-8196	12 months embargo	cannot	green		3						USD	3000	3000		Computer Science; Engineering; Telecommunications	Yes	FALSE	FALSE	FALSE	FALSE	FALSE	FALSE	FALSE	FALSE	FALSE	FALSE	FALSE	FALSE
10.1007/s11277-016-3768-9	oa repository (via OAI-PMH title and first author match)	cc-by-nc	green	Wireless Information and Energy Transfer in Nonregenerative OFDM AF Relay Systems	Huang, Gaofei; Tu, Wanqing	2	No	Wireless Personal Communications	2017	Springer Nature	TRUE	journal-article		FALSE	submittedVersion	repository	Yes	openair.rgu.ac.uk	1	FALSE	1572-834X	12 months embargo	cannot	green		6	https://openair.rgu.ac.uk/bitstream/10059/2227/3/HUANG%202016%20Wireless%20information%20and%20energy%20transfer.pdf					USD	3000	3000	Guangdong natural science foundation [2014A030310349]; Guangdong science and technology Project [2016A010101032 2013B010402018 2013B020200016]; Guangzhou science and technology Project [2014J4100142 2014J4100233]; Guangzhou education bureau science and technology Project [2012A082]; Guangzhou college and university science and technology Project [1201421329]; U.K. EPSRC [EP/J017159/1]; Engineerin…	Telecommunications	No	FALSE	FALSE	FALSE	FALSE	FALSE	FALSE	FALSE	FALSE	FALSE	FALSE	FALSE	FALSE
10.1007/s11277-017-4033-6			closed	Energy Efficient Cooperation with Chip-Interleaved Transceivers in WSNs Over Frequency-Selective Fading Channels	Tian, Jianjie; Berber, Stevan; Rowe, Gerard	3	No	Wireless Personal Communications	2017	Springer Nature	FALSE	journal-article		FALSE			No		0	FALSE	1572-834X	12 months embargo	cannot	green		1						USD	3000	3000		Telecommunications	Yes	FALSE	FALSE	FALSE	FALSE	FALSE	FALSE	FALSE	FALSE	FALSE	FALSE	FALSE	FALSE
10.1007/s11277-017-4146-y			closed	Precise Error Rate Analysis of Wireless Relay Networks	Khalil, Muhammad I.; Berber, Stevan M.; Sowerby, Kevin W.	3	No	Wireless Personal Communications	2017	Springer Nature	FALSE	journal-article		FALSE			No		0	FALSE	1572-834X	12 months embargo	cannot	green		1						USD	3000	3000		Telecommunications	Yes	FALSE	FALSE	FALSE	FALSE	FALSE	FALSE	FALSE	FALSE	FALSE	FALSE	FALSE	FALSE
10.1007/s11295-017-1141-0			closed	Quantitative trait loci controlling vegetative propagation traits mapped in European pear (Pyrus communis L.)	Kn\\U00E4Bel, Mareike; Friend, Adam P.; Palmer, John W.; Diack, Robert; Gardiner, Susan E.; Tustin, Stuart; Schaffer, Robert; Foster, Toshi; Chagn\\U00E9, David	9	No	Tree Genetics & Genomes	2017	Springer Nature	FALSE	journal-article		FALSE			No		0	FALSE	1614-2950	12 months embargo	cannot	green		3						USD	3000	3000	New Zealand Ministry of Business Innovation and Employment [27744 30467]	Forestry; Genetics & Heredity; Agriculture	No	FALSE	FALSE	FALSE	FALSE	FALSE	TRUE	FALSE	TRUE	FALSE	FALSE	FALSE	FALSE
10.1007/s11356-016-8307-4			closed	Ecotoxicological bioassays of sediment leachates in a river bed flanked by decommissioned pesticide plants in Nantong City, East China	Zhou, Yan; Wang, Fenghe; Wan, Jinzhong; He, Jian; Li, Qun; Gao, Jay; Lin, Yusuo; Zhang, Shengtian	8	No	Environmental Science and Pollution Research	2017	Springer Nature	FALSE	journal-article		FALSE			No		0	FALSE	1614-7499	12 months embargo	cannot	green		0						USD	3000	3000	central level scientific research institutes for basic R and D special fund business; Environmental Protection Special Fund for Scientific Research [200909075]; National Natural Science Foundation of China [41571316 41201311]; Environmental Protection Scientific Research Subject of Jiangsu Province [2013026]	Environmental Sciences & Ecology	No	FALSE	FALSE	FALSE	FALSE	FALSE	FALSE	FALSE	FALSE	FALSE	FALSE	FALSE	FALSE
10.1007/s11356-017-9357-y			closed	Development of a real-time polymerase chain reaction assay for the detection of the invasive Mediterranean fanworm, Sabella spallanzanii, in environmental samples	Wood, Susanna A.; Zaiko, Anastasija; Richter, Ingrid; Inglis, Graeme J.; Pochon, Xavier	5	No	Environmental Science and Pollution Research	2017	Springer Nature	FALSE	journal-article		FALSE			No		0	FALSE	1614-7499	12 months embargo	cannot	green		5						USD	3000	3000	NIWA under Coasts and Oceans Research Programme 6 Marine Biosecurity [2015/16 SCI]	Environmental Sciences & Ecology	No	FALSE	FALSE	FALSE	FALSE	FALSE	FALSE	FALSE	FALSE	FALSE	FALSE	FALSE	FALSE
10.1007/s11423-017-9536-z			closed	Knowledge typologies for professional learning: educatorsâ€™ (re)generation of knowledge when learning open educational practice	Hood, Nina; Littlejohn, Allison	2	No	Educational Technology Research and Development	2017	Springer Nature	FALSE	journal-article		FALSE			No		0	FALSE	1556-6501	12 months embargo	cannot	green		0						USD	3000	3000	European Commission [2014-1-SE01-KA200-000994]	Education & Educational Research	Yes	FALSE	FALSE	FALSE	FALSE	FALSE	FALSE	FALSE	FALSE	FALSE	FALSE	FALSE	FALSE
10.1007/s11469-017-9843-y			closed	Design and Methods of the New Zealand National Gambling Study, a Prospective Cohort Study of Gambling and Health: 2012â€“2019	Abbott, Max; Bellringer, Maria; Garrett, Nick; Kolandai-Matchett, Komathi	4	No	International Journal of Mental Health and Addiction	2017	Springer Nature	FALSE	journal-article		FALSE			No		0	FALSE	1557-1882	12 months embargo	cannot	green		0						USD	3000	3000	New Zealand Ministry of Health [335667 349827/00 349827]	Psychology; Substance Abuse; Psychiatry	Yes	FALSE	FALSE	FALSE	FALSE	FALSE	FALSE	FALSE	FALSE	FALSE	FALSE	FALSE	FALSE
10.1007/s11523-017-0476-7			closed	Exploiting microRNAs As Cancer Therapeutics	Robb, Tamsin; Reid, Glen; Blenkiron, Cherie	3	No	Targeted Oncology	2017	Springer Nature	FALSE	journal-article		FALSE			No		0	FALSE	1776-260X	12 months embargo	cannot	green		8						USD	3000	3000	Translational Medicine Trust University of Auckland; Asbestos Diseases Research Foundation (ADRF); Cancer Institute NSW; Cancer Council NSW; Dust Diseases Authority; Translational Medicine Trust University of Auckland and Ministry of Business Innovation and Employment (MBIE)	Oncology	Yes	FALSE	FALSE	FALSE	FALSE	FALSE	TRUE	FALSE	TRUE	FALSE	FALSE	FALSE	FALSE
10.1007/s11523-017-0515-4			closed	EGFR Mutation Testing of non-squamous NSCLC: Impact and Uptake during Implementation of Testing Guidelines in a Population-Based Registry Cohort from Northern New Zealand	Mckeage, Mark; Elwood, Mark; Tin Tin, Sandar; Khwaounjoo, Prashannata; Aye, Phyu; Li, Angie; Sheath, Karen; Shepherd, Phillip; Laking, George; Kingston, Nicola; Lewis, Christopher; Love, Donald	12	No	Targeted Oncology	2017	Springer Nature	FALSE	journal-article		FALSE			No		0	FALSE	1776-260X	12 months embargo	cannot	green		2						USD	3000	3000	Health Research Council of New Zealand [13/981 15/087]	Oncology	Yes	FALSE	TRUE	FALSE	FALSE	FALSE	FALSE	FALSE	TRUE	FALSE	FALSE	FALSE	FALSE
10.1007/s11657-017-0353-0			closed	Fragility fractures at Auckland City Hospital: we can do better	Braatvedt, Geoffrey; Wilkinson, Susan; Scott, Marilyn; Mitchell, Paul; Harris, Roger	5	No	Archives of Osteoporosis	2017	Springer Nature	FALSE	journal-article		FALSE			No		0	FALSE	1862-3514	12 months embargo	cannot	green		1						USD	3000	3000	Merck Sharpe and Dohme; Eli Lilly	Endocrinology & Metabolism; Orthopedics	Yes	FALSE	FALSE	FALSE	FALSE	FALSE	FALSE	FALSE	FALSE	FALSE	FALSE	FALSE	FALSE
10.1007/s11661-017-4043-8			closed	Dehydrogenation and Sintering of TiH2: An In Situ Study	Chen, Gang; Liss, Klaus D.; Auchterlonie, Graeme; Tang, Huiping; Cao, Peng	5	No	Metallurgical and Materials Transactions A	2017	Springer Nature	FALSE	journal-article		FALSE			No		0	FALSE	1543-1940	12 months embargo	cannot	green		6						USD	3000	3000	Ministry of Business Innovation and Employment (MBIE) New Zealand; Australian Institute of Nuclear Science and Engineering (AINSE) Ltd. [P3430]; Shaanxi Youth Science and Technology New Star Project [2016KJXX-78]; Shaanxi Science and Technology Co-ordination and Innovation Project [2016KTCQ01-113]; State Key Laboratory for Powder Metallurgy Central South University Changsha P.R. China	Materials Science; Metallurgy & Metallurgical Engineering	Yes	FALSE	FALSE	FALSE	FALSE	FALSE	TRUE	FALSE	TRUE	FALSE	FALSE	FALSE	FALSE
10.1007/s11661-017-4080-3			closed	Relationships Between Smelter Grade Alumina Characteristics and Strength Determined by Nanoindentation and Ultrasound-Mediated Particle Breakage	Wijayaratne, Hasini; Mcintosh, Grant; Hyland, Margaret; Perander, Linus; Metson, James	5	No	Metallurgical and Materials Transactions A	2017	Springer Nature	FALSE	journal-article		FALSE			No		0	FALSE	1543-1940	12 months embargo	cannot	green		3						USD	3000	3000	Outotec GmbH	Materials Science; Metallurgy & Metallurgical Engineering	Yes	FALSE	FALSE	FALSE	FALSE	FALSE	FALSE	FALSE	FALSE	FALSE	FALSE	FALSE	FALSE
10.1007/s11663-016-0893-5			closed	Response of Cryolite-Based Bath to a Shift in Heat Input/output Balance	Liu, Jingjing; Taylor, Mark; Dorreen, Mark	3	No	Metallurgical and Materials Transactions B	2017	Springer Nature	FALSE	journal-article		FALSE			No		0	FALSE	1543-1916	12 months embargo	cannot	green		4						USD	3000	3000	ministry of Business Innovation and Employment (MBIE) in New Zealand; Chinese Scholarship Council (CSC)	Materials Science; Metallurgy & Metallurgical Engineering	Yes	FALSE	FALSE	FALSE	FALSE	FALSE	TRUE	FALSE	TRUE	FALSE	FALSE	FALSE	FALSE
10.1007/s11663-017-1109-3			closed	Investigation of the Influence of Heat Balance Shifts on the Freeze Microstructure and Composition in Aluminum Smelting Bath System: Cryolite-CaF2-AlF3-Al2O3	Liu, Jingjing; Fallah-Mehrjardi, Ata; Shishin, Denis; Jak, Evgueni; Dorreen, Mark; Taylor, Mark	6	No	Metallurgical and Materials Transactions B	2017	Springer Nature	FALSE	journal-article		FALSE			No		0	FALSE	1543-1916	12 months embargo	cannot	green		6						USD	3000	3000	ministry of Business Innovation and Employment (MBIE) in New Zealand; Chinese Scholarship Council (CSC); LMRC; University of Auckland; University of Queensland Australia	Materials Science; Metallurgy & Metallurgical Engineering	Yes	FALSE	FALSE	FALSE	FALSE	FALSE	TRUE	FALSE	TRUE	FALSE	FALSE	FALSE	FALSE
10.1007/s11695-016-2399-2			closed	Differential Changes in Gut Microbiota After Gastric Bypass and Sleeve Gastrectomy Bariatric Surgery Vary According to Diabetes Remission	Murphy, Rinki; Tsai, Peter; J\\U00Fcllig, Mia; Liu, Amy; Plank, Lindsay; Booth, Michael	6	No	Obesity Surgery	2017	Springer Nature	FALSE	journal-article		FALSE			No		0	FALSE	1708-0428	12 months embargo	cannot	green		42						USD	3000	3000	Maurice Wilkins Centre for Molecular Biodiscovery; Waitemata District Health Board; Johnson and Johnson (NZ); Covidien (NZ); Obex (NZ)	Surgery	Yes	FALSE	FALSE	FALSE	FALSE	FALSE	FALSE	FALSE	FALSE	FALSE	FALSE	FALSE	FALSE
10.1007/s11695-017-2597-6			closed	Patterns of Abnormal Gastric Pacemaking After Sleeve Gastrectomy Defined by Laparoscopic High-Resolution Electrical Mapping	Berry, Rachel; Cheng, Leo K.; Du, Peng; Paskaranandavadivel, Niranchan; Angeli, Timothy R.; Mayne, Terence; Beban, Grant; O\\U2019Grady, Gregory	8	No	Obesity Surgery	2017	Springer Nature	FALSE	journal-article		FALSE			No		0	FALSE	1708-0428	12 months embargo	cannot	green		9						USD	3000	3000	NZ Health Research Council (HRC); US NIH [R01 DK64775]; NZ MedTech CoRE; Commonwealth Scholarship; Rutherford Discovery Fellowship	Surgery	Yes	FALSE	TRUE	TRUE	FALSE	TRUE	FALSE	FALSE	TRUE	FALSE	FALSE	FALSE	FALSE
10.1007/s11695-017-2901-5			closed	Does Bariatric Surgery Affect the Incidence of Breast Cancer Development? A Systematic Review	Winder, Alec A.; Kularatna, Malsha; Maccormick, Andrew D.	3	No	Obesity Surgery	2017	Springer Nature	FALSE	journal-article		FALSE			No		0	FALSE	1708-0428	12 months embargo	cannot	green		5						USD	3000	3000		Surgery	No	FALSE	FALSE	FALSE	FALSE	FALSE	FALSE	FALSE	FALSE	FALSE	FALSE	FALSE	FALSE
10.1007/s11696-016-0074-7			closed	Solid-state NMR and FTIR investigations of standard and nanotubular polyanilines	Zujovic, Zoran D.	1	No	Chemical Papers	2017	Springer Nature	FALSE	journal-article		FALSE			No		0	FALSE	1336-9075	12 months embargo	cannot	green		0						USD	3000	3000		Chemistry	Yes	FALSE	FALSE	FALSE	FALSE	FALSE	FALSE	FALSE	FALSE	FALSE	FALSE	FALSE	FALSE
10.1007/s11814-016-0226-z			closed	Extraction of bioethanol from fermented sweet sorghum bagasse by batch distillation	Li, Guangming; Li, Jihong; Li, Shizhong; Zu, Xu; Zhang, Lei; Qi, Lisong; Xu, Weiliang	7	No	Korean Journal of Chemical Engineering	2017	Springer Nature	FALSE	journal-article		FALSE			No		0	FALSE	1975-7220	12 months embargo	cannot	green		3									National High-tech RandD Program (863 Program) [2012AA101805]; International Scientific and Technological Cooperation Program of the Ministry of Science and Technology of China [2012DFG61720 2013DFA60470]; Beijing Science and Technology New Innovations Development Base Project [Z131109002813080]	Chemistry; Engineering	No	FALSE	FALSE	FALSE	FALSE	FALSE	FALSE	FALSE	FALSE	FALSE	FALSE	FALSE	FALSE
10.1007/s11856-017-1476-0	oa repository (via OAI-PMH doi match)		green	Strongly transitive actions on euclidean buildings	Kramer, Linus; Schillewaert, Jeroen	2	No	Israel Journal of Mathematics	2017	Springer Nature	TRUE	journal-article		FALSE	submittedVersion	repository	Yes	arXiv.org	1	FALSE	1565-8511	12 months embargo	cannot	green		0	http://arxiv.org/pdf/1506.03594					USD	3000	3000	Alexander Von Humboldt Foundation; [SFB 878]	Mathematics	No	FALSE	FALSE	FALSE	FALSE	FALSE	FALSE	FALSE	FALSE	FALSE	FALSE	FALSE	FALSE
10.1007/s11856-017-1563-2	oa repository (via OAI-PMH title and first author match)		green	Describing finite groups by short first-order sentences	Nies, Andr\\U00E9; Tent, Katrin	2	No	Israel Journal of Mathematics	2017	Springer Nature	TRUE	journal-article		FALSE	submittedVersion	repository	Yes	arXiv.org	1	FALSE	1565-8511	12 months embargo	cannot	green		0	http://arxiv.org/pdf/1409.8390					USD	3000	3000	Marsden fund of New Zealand; Hood fellowship by the Lions foundation of New Zealand; DFG [SFB 878]	Mathematics	Yes	FALSE	FALSE	FALSE	TRUE	TRUE	FALSE	FALSE	TRUE	FALSE	FALSE	FALSE	FALSE
10.1007/s11869-017-0492-x			closed	Regulation of fine particulate matter (PM2.5) in the Pacific Rim: perspectives from the APRU Global Health Program	Wu, Chang-Fu; Woodward, Alistair; Li, Ya-Ru; Kan, Haidong; Balasubramanian, Rajasekhar; Latif, Mohd Talib; Sahani, Mazrura; Cheng, Tsun-Jen; Chio, Chia-Pin; Taneepanichskul, Nutta; Kim, Ho; Chan, Chang-Chuan; Yi, Seung-Muk; Withers, Mellissa; Samet, Jonathan	15	No	Air Quality, Atmosphere & Health	2017	Springer Nature	FALSE	journal-article		FALSE			No		0	FALSE	1873-9326	12 months embargo	cannot	green		2						USD	3000	3000		Environmental Sciences & Ecology	No	FALSE	FALSE	FALSE	FALSE	FALSE	FALSE	FALSE	FALSE	FALSE	FALSE	FALSE	FALSE
10.1007/s11934-017-0743-2			closed	Aquablation of the Prostate for Symptomatic Benign Prostatic Hyperplasia: Early Results	Yassaie, Omid; Silverman, Joshua A.; Gilling, Peter J.	3	No	Current Urology Reports	2017	Springer Nature	FALSE	journal-article		FALSE			No		0	FALSE	1534-6285	12 months embargo	cannot	green		5						USD	3000	3000		Urology & Nephrology	No	FALSE	FALSE	FALSE	FALSE	FALSE	FALSE	FALSE	FALSE	FALSE	FALSE	FALSE	FALSE
10.1007/s11947-017-1880-9			closed	Spray-Drying of Antioxidant-Rich Blueberry Waste Extracts; Interplay Between Waste Pretreatments and Spray-Drying Process	Waterhouse, Geoffrey I. N.; Sun-Waterhouse, Dongxiao; Su, Guowan; Zhao, Haifeng; Zhao, Mouming	5	No	Food and Bioprocess Technology	2017	Springer Nature	FALSE	journal-article		FALSE			No		0	FALSE	1935-5149	12 months embargo	cannot	green		7						USD	3000	3000		Food Science & Technology	Yes	FALSE	FALSE	FALSE	FALSE	FALSE	FALSE	FALSE	FALSE	FALSE	FALSE	FALSE	FALSE
10.1007/s11999-016-5111-x	open (via free pdf)		bronze	CORR InsightsÂ®: Operative Fluoroscopic Correction Is Reliable and Correlates With Postoperative Radiographic Correction in Periacetabular Osteotomy	Pitto, Rocco P.	1	No	Clinical Orthopaedics and Related ResearchÂ®	2017	Springer Nature	TRUE	journal-article		FALSE	publishedVersion	publisher	Yes	pubmedcentral.nih.gov	1	FALSE	1528-1132	12 months embargo	cannot	yellow		0	https://doi.org/10.1007/s11999-016-5111-x					USD	3000	3000		Orthopedics; Surgery	Yes	FALSE	FALSE	FALSE	FALSE	FALSE	FALSE	FALSE	FALSE	FALSE	FALSE	FALSE	FALSE
10.1007/s11999-017-5396-4	open (via free pdf)		bronze	Periprosthetic Joint Infection Is the Main Cause of Failure for Modern Knee Arthroplasty: An Analysis of 11,134 Knees	Koh, Chuan Kong; Zeng, Irene; Ravi, Saiprassad; Zhu, Mark; Vince, Kelly G.; Young, Simon W.	6	No	Clinical Orthopaedics and Related ResearchÂ®	2017	Springer Nature	TRUE	journal-article		FALSE	publishedVersion	publisher	No		0	FALSE	1528-1132	12 months embargo	cannot	yellow		28	https://doi.org/10.1007/s11999-017-5396-4					USD	3000	3000		Orthopedics; Surgery	No	FALSE	FALSE	FALSE	FALSE	FALSE	FALSE	FALSE	FALSE	FALSE	FALSE	FALSE	FALSE
10.1007/s12015-017-9717-5			closed	Understanding Parkinsonâ€™s Disease through the Use of Cell Reprogramming	Playne, Rebecca; Connor, Bronwen	2	No	Stem Cell Reviews and Reports	2017	Springer Nature	FALSE	journal-article		FALSE			No		0	FALSE	1558-6804	12 months embargo	cannot	green		8						USD	3000	3000		Cell Biology; Research & Experimental Medicine	Yes	FALSE	FALSE	FALSE	FALSE	FALSE	FALSE	FALSE	FALSE	FALSE	FALSE	FALSE	FALSE
10.1007/s12024-017-9883-4			closed	Fatal and non-fatal drowning in rivers	Webber, Jonathon; Schmidt, Andrew C.; Sempsrott, Justin R.; Szpilman, David; Queiroga, Ana Catarina; Clemens, Tessa; Hood, Natalie	7	No	Forensic Science, Medicine and Pathology	2017	Springer Nature	FALSE	journal-article		FALSE			No		0	FALSE	1556-2891	12 months embargo	cannot	green		1						USD	3000	3000		Legal Medicine; Pathology	Yes	FALSE	FALSE	FALSE	FALSE	FALSE	FALSE	FALSE	FALSE	FALSE	FALSE	FALSE	FALSE
10.1007/s12078-016-9220-4			closed	Personality and Perceptions of Common Odors	Shepherd, Daniel; Hautus, Michael J.; Urale, Poutasi W. B.	3	No	Chemosensory Perception	2017	Springer Nature	FALSE	journal-article		FALSE			No		0	FALSE	1936-5810	12 months embargo	cannot	green		0						USD	3000	3000		Food Science & Technology; Neurosciences & Neurology	Yes	FALSE	FALSE	FALSE	FALSE	FALSE	FALSE	FALSE	FALSE	FALSE	FALSE	FALSE	FALSE
10.1007/s12110-016-9276-5			closed	Cooperative Learning Groups and the Evolution of Human Adaptability	Bell, Adrian Viliami; Hernandez, Daniel	2	No	Human Nature	2017	Springer Nature	FALSE	journal-article		FALSE			No		0	FALSE	1936-4776	12 months embargo	cannot	green		2						USD	3000	3000	Department of Anthropology University of Utah; University of Utah	Anthropology; Biomedical Social Sciences	No	FALSE	FALSE	FALSE	FALSE	FALSE	FALSE	FALSE	FALSE	FALSE	FALSE	FALSE	FALSE
10.1007/s12116-017-9250-1			closed	Co-Investment and Clientelism as Informal Institutions: Beyond â€˜Good Enoughâ€™ Property Rights Protection	Hamilton-Hart, Natasha; Palmer, Blair	2	No	Studies in Comparative International Development	2017	Springer Nature	FALSE	journal-article		FALSE			No		0	FALSE	1936-6167	12 months embargo	cannot	green		0						USD	3000	3000	University of Auckland	Development Studies; International Relations; Government & Law	Yes	FALSE	FALSE	FALSE	FALSE	FALSE	FALSE	FALSE	FALSE	FALSE	FALSE	FALSE	FALSE
10.1007/s12160-017-9888-y			closed	Understanding the Dimensions of Anti-Vaccination Attitudes: the Vaccination Attitudes Examination (VAX) Scale	Martin, Leslie R.; Petrie, Keith J.	2	No	Annals of Behavioral Medicine	2017	Springer Nature	FALSE	journal-article		FALSE			No		0	FALSE	1532-4796	12 months embargo	cannot	yellow		5						USD	3000	3000		Psychology	No	FALSE	FALSE	FALSE	FALSE	FALSE	FALSE	FALSE	FALSE	FALSE	FALSE	FALSE	FALSE
10.1007/s12160-017-9913-1			closed	The Impact of 3-D Models versus Animations on Perceptions of Osteoporosis and Treatment Motivation: A Randomised Trial	Jones, Annie S. K.; Fernandez, Justin; Grey, Andrew; Petrie, Keith J.	4	No	Annals of Behavioral Medicine	2017	Springer Nature	FALSE	journal-article		FALSE			No		0	FALSE	1532-4796	12 months embargo	cannot	yellow		2						USD	3000	3000		Psychology	Yes	FALSE	FALSE	FALSE	FALSE	FALSE	FALSE	FALSE	FALSE	FALSE	FALSE	FALSE	FALSE
10.1007/s12221-017-7418-y			closed	Vibration damping of flax fibre-reinforced polypropylene composites	Rahman, Md Zillur; Jayaraman, Krishnan; Mace, Brian Richard	3	No	Fibers and Polymers	2017	Springer Nature	FALSE	journal-article		FALSE			No		0	FALSE	1875-0052	12 months embargo	cannot	green		6									Department of Mechanical Engineering University of Auckland New Zealand	Materials Science; Polymer Science	Yes	FALSE	FALSE	FALSE	FALSE	FALSE	FALSE	FALSE	FALSE	FALSE	FALSE	FALSE	FALSE
10.1007/s12262-017-1594-2	oa repository (via OAI-PMH title and first author match)		green	Aberrant Intrathyroid Tissue: a Report of Intrathyroid Lymph Node Metastasis and a Review of Literature	Shawky, Michael S; Meyer-Rochow, Win	2	No	Indian Journal of Surgery	2017	Springer Nature	TRUE	journal-article		FALSE	publishedVersion	repository	Yes	pubmedcentral.nih.gov	1	FALSE	0973-9793	12 months embargo	cannot	green		0	http://europepmc.org/articles/pmc5386949									Surgery	No	FALSE	FALSE	FALSE	FALSE	FALSE	FALSE	FALSE	FALSE	FALSE	FALSE	FALSE	FALSE
10.1007/s12311-016-0759-z			closed	Computational Architecture of the Granular Layer of Cerebellum-Like Structures	Bratby, Peter; Sneyd, James; Montgomery, John	3	No	The Cerebellum	2017	Springer Nature	FALSE	journal-article		FALSE			No		0	FALSE	1473-4230	12 months embargo	cannot	green		4						USD	3000	3000		Neurosciences & Neurology	Yes	FALSE	FALSE	FALSE	FALSE	FALSE	FALSE	FALSE	FALSE	FALSE	FALSE	FALSE	FALSE
10.1007/s12311-016-0820-y			closed	Sequential Pattern Formation in the Cerebellar Granular Layer	Bratby, Peter; Sneyd, James; Montgomery, John	3	No	The Cerebellum	2017	Springer Nature	FALSE	journal-article		FALSE			No		0	FALSE	1473-4230	12 months embargo	cannot	green		0						USD	3000	3000			Yes	FALSE	FALSE	FALSE	FALSE	FALSE	FALSE	FALSE	FALSE	FALSE	FALSE	FALSE	FALSE
10.1007/s12529-016-9597-0			closed	The Association Between Social Support, Body Mass Index and Increased Risk of Prediabetes: the Cardiovascular Risk in Young Finns Study	Serlachius, Anna; Elovainio, Marko; Juonala, Markus; Shea, Steven; Sabin, Matthew; Lehtim\\U00E4Ki, Terho; Raitakari, Olli; Keltikangas-J\\U00E4Rvinen, Liisa; Pulkki-R\\U00E5Back, Laura	9	No	International Journal of Behavioral Medicine	2017	Springer Nature	FALSE	journal-article		FALSE			No		0	FALSE	1532-7558	12 months embargo	cannot	green		0						USD	3000	3000	Academy of Finland [126925 121584 124282 129378 117787 41071 265869 258711 258578 265977 286284]; Social Insurance Institution of Finland Kuopio Tampere; Turku University Hospital Medical Funds [9N035 X51001]; Juho Vainio Foundation; Signe and Ane Gyllenberg Foundation; Emil Aaltonen Foundation; Paavo Nurmi Foundation; Finnish Foundation of Cardiovascular Research; Finnish Cultural Foundation; Os…	Psychology	No	FALSE	FALSE	FALSE	FALSE	FALSE	FALSE	FALSE	FALSE	FALSE	FALSE	FALSE	FALSE
10.1007/s12530-017-9176-x			closed	Design of spiking neural networks for blood pressure prediction during general anesthesia: considerations for optimizing results	Hamano, Go; Lowe, Andrew; Cumin, David	3	No	Evolving Systems	2017	Springer Nature	FALSE	journal-article		FALSE			No		0	FALSE	1868-6486	12 months embargo	cannot	green		0						USD	3000	3000	Knowledge Engineering and Discovery Research Institute Auckland University of Technology New Zealand	Computer Science	Yes	FALSE	FALSE	FALSE	FALSE	FALSE	FALSE	FALSE	FALSE	FALSE	FALSE	FALSE	FALSE
10.1007/s12564-017-9469-6			closed	Assessment for learning and for accountability in classrooms: The experience of four Hong Kong primary school curriculum leaders	Hui, Sammy King Fai; Brown, Gavin T. L.; Chan, Sky Wai Man	3	No	Asia Pacific Education Review	2017	Springer Nature	FALSE	journal-article		FALSE			No		0	FALSE	1876-407X	12 months embargo	cannot	green		6						USD	3000	3000		Education & Educational Research	No	FALSE	FALSE	FALSE	FALSE	FALSE	FALSE	FALSE	FALSE	FALSE	FALSE	FALSE	FALSE
10.1007/s12564-017-9499-0			closed	Workplace harassment among staff in higher education: a systematic review	Henning, Marcus A.; Zhou, Chen; Adams, Peter; Moir, Fiona; Hobson, Jennifer; Hallett, Charlene; Webster, Craig S.	7	No	Asia Pacific Education Review	2017	Springer Nature	FALSE	journal-article		FALSE			No		0	FALSE	1876-407X	12 months embargo	cannot	green		3						USD	3000	3000	Summer Studentship Stipend from the Faculty of Medical and Health Sciences University of Auckland New Zealand	Education & Educational Research	Yes	FALSE	FALSE	FALSE	FALSE	FALSE	FALSE	FALSE	FALSE	FALSE	FALSE	FALSE	FALSE
10.1007/s12667-016-0210-z			closed	Investment and generation optimization in electricity systems with intermittent supply	Wu, Athena; Philpott, Andy; Zakeri, Golbon	3	No	Energy Systems	2017	Springer Nature	FALSE	journal-article		FALSE			No		0	FALSE	1868-3975	12 months embargo	cannot	green		8						USD	3000	3000		Energy & Fuels	Yes	FALSE	FALSE	FALSE	FALSE	FALSE	FALSE	FALSE	FALSE	FALSE	FALSE	FALSE	FALSE
10.1007/s12667-016-0216-6	open (via free pdf)		bronze	Editorial for the special issue: â€œOptimization in energyâ€	Van Ackooij, Wim; Philpott, Andy; Sagastiz\\U00E1Bal, Claudia; Zorgati, Riadh	4	No	Energy Systems	2017	Springer Nature	TRUE	journal-article		FALSE	publishedVersion	publisher	No		0	FALSE	1868-3975	12 months embargo	cannot	green		0	https://link.springer.com/content/pdf/10.1007%2Fs12667-016-0216-6.pdf					USD	3000	3000		Energy & Fuels	No	FALSE	FALSE	FALSE	FALSE	FALSE	FALSE	FALSE	FALSE	FALSE	FALSE	FALSE	FALSE
10.1007/s12671-016-0585-x			closed	Paradoxical Effects of Self-Compassion on Mood and Teeth Flossing Behavior in an Experimental Setting	Friis, Anna M.; Johnson, Malcolm H.; Consedine, Nathan S.	3	No	Mindfulness	2017	Springer Nature	FALSE	journal-article		FALSE			No		0	FALSE	1868-8535	12 months embargo	cannot	green		0						USD	3000	3000		Psychology; Psychiatry	Yes	FALSE	FALSE	FALSE	FALSE	FALSE	FALSE	FALSE	FALSE	FALSE	FALSE	FALSE	FALSE
10.1007/s12671-017-0705-2			closed	A Brief Mindfulness Intervention Is Associated with Negative Outcomes in a Randomised Controlled Trial Among Chemotherapy Patients	Reynolds, Lisa M.; Bissett, Ian P.; Porter, David; Consedine, Nathan S.	4	No	Mindfulness	2017	Springer Nature	FALSE	journal-article		FALSE			No		0	FALSE	1868-8535	12 months embargo	cannot	green		7						USD	3000	3000	Oakley Mental Health Foundation; Medical Oncology Department Auckland City Hospital; Regional Cancer and Blood Service; Auckland Division of the Cancer Society	Psychology; Psychiatry	Yes	FALSE	FALSE	FALSE	FALSE	FALSE	FALSE	FALSE	FALSE	FALSE	FALSE	FALSE	FALSE
10.1007/s13157-017-0893-5	open (via free pdf)		bronze	Erratum to: Allometric Models for Estimating Aboveground Biomass, Carbon and Nitrogen Stocks in Temperate Avicennia marina Forests	Bulmer, Richard H.; Schwendenmann, Luitgard; Lundquist, Carolyn J.	3	No	Wetlands	2017	Springer Nature	TRUE	journal-article		FALSE	publishedVersion	publisher	No		0	FALSE	1943-6246	12 months embargo	cannot	green		0	https://link.springer.com/content/pdf/10.1007%2Fs13157-017-0893-5.pdf					USD	3000	3000		Environmental Sciences & Ecology	Yes	FALSE	FALSE	FALSE	FALSE	FALSE	FALSE	FALSE	FALSE	FALSE	FALSE	FALSE	FALSE
10.1007/s13197-017-2526-7	oa repository (via OAI-PMH title and first author match)		green	An insight on the relationship between food compressibility and microbial inactivation during high pressure processing	Fauzi, Noor Akhmazillah; Farid, Mohammed Mehdi; Silva, Filipa	3	No	Journal of Food Science and Technology	2017	Springer Nature	TRUE	journal-article		FALSE	publishedVersion	repository	Yes	pubmedcentral.nih.gov	1	FALSE	0975-8402	12 months embargo	cannot	green		0	http://europepmc.org/articles/pmc5334240								SLAB scholarship	Food Science & Technology	Yes	FALSE	FALSE	FALSE	FALSE	FALSE	FALSE	FALSE	FALSE	FALSE	FALSE	FALSE	FALSE
10.1007/s13197-017-2746-x	oa repository (via pmcid lookup)		green	Effect of walnut protein hydrolysate on scopolamine-induced learning and memory deficits in mice	Li, Wenzhi; Zhao, Tiantian; Zhang, Jianan; Xu, Jucai; Sun-Waterhouse, Dongxiao; Zhao, Mouming; Su, Guowan	7	No	Journal of Food Science and Technology	2017	Springer Nature	TRUE	journal-article		FALSE	publishedVersion	repository	No	no_oai_data	1	FALSE	0975-8402	12 months embargo	cannot	green		6	https://www.ncbi.nlm.nih.gov/pmc/articles/PMC5602973								Strategic Emerging Industry Key Scientific and Technological Program of Guangdong Province [2012A080800014]; Guangzhou Science and Technology Plan Projects [201604020122]; special funds for public welfare research and capacity building in Guangdong Province [2014B020204001]	Food Science & Technology	No	FALSE	FALSE	FALSE	FALSE	FALSE	FALSE	FALSE	FALSE	FALSE	FALSE	FALSE	FALSE
10.1007/s13233-017-5131-8			closed	Synthesis and characterization of novel TrÃ¶gerâ€™s base containing polymers from commercial available diamines	Wu, Zhixiu; Jin, Jianyong	2	No	Macromolecular Research	2017	Springer Nature	FALSE	journal-article		FALSE			No		0	FALSE	2092-7673	12 months embargo	cannot	green		1									Science for Technological Innovation (SfTI) seed fund New Zealand National Science Challenges (NSC)	Polymer Science	Yes	FALSE	FALSE	FALSE	FALSE	FALSE	FALSE	FALSE	FALSE	FALSE	FALSE	FALSE	FALSE
10.1007/s13296-017-6005-9	oa repository (via OAI-PMH title and first author match)		green	Optimum design of cold-formed steel portal frame buildings including joint effects and secondary members	Phan, Duoc T.; Lim, James B. P.; Tanyimboh, Tiku T.; Sha, Wei	4	No	International Journal of Steel Structures	2017	Springer Nature	TRUE	journal-article		FALSE	publishedVersion	repository	Yes	pure.qub.ac.uk strathprints.strath.ac.uk	2	FALSE	2093-6311	No information	No information	No information		1	https://pure.qub.ac.uk/portal/files/131379296/355.pdf									Construction & Building Technology; Engineering	No	FALSE	FALSE	FALSE	FALSE	FALSE	FALSE	FALSE	FALSE	FALSE	FALSE	FALSE	FALSE
10.1007/s13311-017-0536-9	open (via free pdf)		bronze	Tonabersat Prevents Inflammatory Damage in the Central Nervous System by Blocking Connexin43 Hemichannels	Kim, Yeri; Griffin, Jarred M.; Nor, Mohd N. Mat; Zhang, Jie; Freestone, Peter S.; Danesh-Meyer, Helen V.; Rupenthal, Ilva D.; Acosta, Monica; Nicholson, Louise F. B.; O\\U2019Carroll, Simon J.; Green, Colin R.	11	No	Neurotherapeutics	2017	Springer Nature	TRUE	journal-article		FALSE	publishedVersion	publisher	No		0	FALSE	1878-7479	12 months embargo	cannot	green		6	https://doi.org/10.1007/s13311-017-0536-9					USD	3000	3000	University of Auckland; CatWalk Spinal Cord Injury Trust; Ministry of Higher Education Malaysia; Auckland UniServices Ltd; New Zealand Return on Science fund; WB Hadden	Neurosciences & Neurology; Pharmacology & Pharmacy	Yes	FALSE	FALSE	FALSE	FALSE	FALSE	FALSE	FALSE	FALSE	FALSE	FALSE	FALSE	FALSE
10.1007/s13361-016-1517-7	open (via free pdf)		bronze	Charging of Proteins in Native Mass Spectrometry	Susa, Anna C.; Xia, Zijie; Tang, Henry Y. H.; Tainer, John A.; Williams, Evan R.	5	No	Journal of The American Society for Mass Spectrometry	2017	Springer Nature	TRUE	journal-article		FALSE	publishedVersion	publisher	Yes	pubmedcentral.nih.gov escholarship.org	2	FALSE	1879-1123	12 months embargo	cannot	green		6	https://doi.org/10.1007/s13361-016-1517-7					USD	3000	3000	National Institutes of Health [R01GM097357]; Robert A. Welch Chemistry Chair; Cancer Prevention and Research Institute of Texas; University of Texas System Science and Technology Acquisition and Retention	Biochemistry & Molecular Biology; Chemistry; Spectroscopy	No	FALSE	FALSE	FALSE	FALSE	FALSE	FALSE	FALSE	FALSE	FALSE	TRUE	FALSE	TRUE
10.1007/s13594-016-0302-5	open (via free pdf)		bronze	Rapid particle size measurements used as a proxy to control instant whole milk powder dispersibility	Boiarkina, I.; Depree, N.; Yu, W.; Wilson, D. I.; Young, B.R.	5	No	Dairy Science & Technology	2017	Springer Nature	TRUE	journal-article		FALSE	publishedVersion	publisher	Yes	HAL aut.researchgateway.ac.nz	2	FALSE	1958-5594	12 months embargo	cannot	green		5	https://link.springer.com/content/pdf/10.1007%2Fs13594-016-0302-5.pdf					USD	3000	3000	Primary Growth Partnership program from the New Zealand Ministry of Primary Industries	Food Science & Technology	Yes	FALSE	FALSE	FALSE	FALSE	FALSE	FALSE	FALSE	FALSE	FALSE	FALSE	FALSE	FALSE
10.1007/s13668-017-0206-x			closed	Obesity and Weight Control: Is There Light at the End of the Tunnel?	Poppitt, S. D.	1	No	Current Nutrition Reports	2017	Springer Nature	FALSE	journal-article		FALSE			No		0	FALSE	2161-3311	12 months embargo	cannot	green		0					3000	USD	3000	3000			Yes	FALSE	FALSE	FALSE	FALSE	FALSE	FALSE	FALSE	FALSE	FALSE	FALSE	FALSE	FALSE
10.1007/s13679-017-0286-3			closed	Bariatric Surgery Registries: Can They Contribute to Improved Outcomes?	Brown, Wendy A.; Maccormick, Andrew D.; Mcneil, John J.; Caterson, Ian D.	4	No	Current Obesity Reports	2017	Springer Nature	FALSE	journal-article		FALSE			No		0	FALSE	2162-4968	12 months embargo	cannot	green		0					3000	USD	3000	3000	Australian Commonwealth Government; Medtronic; Apollo Endosurgery; Applied Medical; GORE; National Health and Medical Research Council of Australia; Novo Nordisk; Pfizer; Bristol-Myers Squibb; SFI; Egg Board	Endocrinology & Metabolism; Nutrition & Dietetics	No	FALSE	FALSE	FALSE	FALSE	FALSE	FALSE	FALSE	FALSE	FALSE	FALSE	FALSE	FALSE
10.1007/s40037-017-0340-6	open (via page says license)	cc-by	hybrid	Burnout, quality of life, motivation, and academic achievement among medical students: AÂ person-oriented approach	Lyndon, Mataroria P.; Henning, Marcus A.; Alyami, Hussain; Krishna, Sanjeev; Zeng, Irene; Yu, Tzu-Chieh; Hill, Andrew G.	7	No	Perspectives on Medical Education	2017	Springer Nature	TRUE	journal-article		FALSE	publishedVersion	publisher	Yes	pubmedcentral.nih.gov	1	FALSE	2212-277X	can	can	green	CC-BY	7	https://doi.org/10.1007/s40037-017-0340-6									Health Care Sciences & Services	Yes	FALSE	FALSE	FALSE	FALSE	FALSE	FALSE	FALSE	FALSE	FALSE	FALSE	FALSE	FALSE
10.1007/s40259-017-0229-2			closed	Targeting Sclerostin in Postmenopausal Osteoporosis: Focus on Romosozumab and Blosozumab	Reid, Ian R.	1	No	BioDrugs	2017	Springer Nature	FALSE	journal-article		FALSE			No		0	FALSE	1179-190X	12 months embargo	cannot	green		3						USD	3000	3000	Health Research Council of New Zealand	Oncology; Immunology; Pharmacology & Pharmacy	Yes	FALSE	TRUE	FALSE	FALSE	FALSE	FALSE	FALSE	TRUE	FALSE	FALSE	FALSE	FALSE
10.1007/s40279-017-0675-5			closed	Polyphenols and Performance: A Systematic Review and Meta-Analysis	Somerville, Vaughan; Bringans, Cameron; Braakhuis, Andrea	3	No	Sports Medicine	2017	Springer Nature	FALSE	journal-article		FALSE			No		0	FALSE	1179-2035	12 months embargo	cannot	green		12						USD	3000	3000		Sport Sciences	Yes	FALSE	FALSE	FALSE	FALSE	FALSE	FALSE	FALSE	FALSE	FALSE	FALSE	FALSE	FALSE
10.1007/s40279-017-0677-3			closed	Performance and Side Effects of Supplementation with N-Acetylcysteine: A Systematic Review and Meta-Analysis	Rhodes, Kate; Braakhuis, Andrea	2	No	Sports Medicine	2017	Springer Nature	FALSE	journal-article		FALSE			No		0	FALSE	1179-2035	12 months embargo	cannot	green		12						USD	3000	3000		Sport Sciences	Yes	FALSE	FALSE	FALSE	FALSE	FALSE	FALSE	FALSE	FALSE	FALSE	FALSE	FALSE	FALSE
10.1007/s40279-017-0702-6	open (via free pdf)		bronze	Erratum to: Polyphenols and Performance: A Systematic Review and Meta-Analysis	Somerville, Vaughan; Bringans, Cameron; Braakhuis, Andrea	3	No	Sports Medicine	2017	Springer Nature	TRUE	journal-article		FALSE	publishedVersion	publisher	No		0	FALSE	1179-2035	12 months embargo	cannot	green		0	https://link.springer.com/content/pdf/10.1007%2Fs40279-017-0702-6.pdf					USD	3000	3000		Sport Sciences	Yes	FALSE	FALSE	FALSE	FALSE	FALSE	FALSE	FALSE	FALSE	FALSE	FALSE	FALSE	FALSE
10.1007/s40670-017-0444-y			closed	Biomedical Students in their First Year of Study: Factors Explaining Performance in a High Stakes Examination	Henning, Marcus A.; Kr\\U00E4Geloh, Christian U.; Booth, Roger; Hill, Erin M.; Chen, Julie; Webster, Craig S.	6	No	Medical Science Educator	2017	Springer Nature	FALSE	journal-article		FALSE			No		0	FALSE	2156-8650	12 months embargo	cannot	green		1					3000	USD	3000	3000			Yes	FALSE	FALSE	FALSE	FALSE	FALSE	FALSE	FALSE	FALSE	FALSE	FALSE	FALSE	FALSE
10.1007/s40670-017-0459-4	open (via free pdf)		bronze	Does Progress Testing Violate the Principles of Constructive Alignment?	Henning, Marcus A.; Pinnock, Ralph; Webster, Craig S.	3	No	Medical Science Educator	2017	Springer Nature	TRUE	journal-article		FALSE	publishedVersion	publisher	No		0	FALSE	2156-8650	12 months embargo	cannot	green		0	https://link.springer.com/content/pdf/10.1007%2Fs40670-017-0459-4.pdf				3000	USD	3000	3000			Yes	FALSE	FALSE	FALSE	FALSE	FALSE	FALSE	FALSE	FALSE	FALSE	FALSE	FALSE	FALSE
10.1007/s40719-017-0078-y			closed	Intraabdominal Vascular Injuries in Blunt Trauma: Spectrum of Presentation, Severity and Management Options	Chandhok, P.; Civil, I. D.	2	No	Current Trauma Reports	2017	Springer Nature	FALSE	journal-article		FALSE			No		0	FALSE	2198-6096	unknown	unknown	gray		0					3000	USD	3000	3000		General & Internal Medicine	No	FALSE	FALSE	FALSE	FALSE	FALSE	FALSE	FALSE	FALSE	FALSE	FALSE	FALSE	FALSE
10.1007/s40753-016-0043-0			closed	Reasoning from an Eikosogram: an Exploratory Study	Pfannkuch, Maxine; Budgett, Stephanie	2	No	International Journal of Research in Undergraduate Mathematics Education	2017	Springer Nature	FALSE	journal-article		FALSE			No		0	FALSE	2198-9753	No information	No information	No information		3						USD	3000	3000			No	FALSE	FALSE	FALSE	FALSE	FALSE	FALSE	FALSE	FALSE	FALSE	FALSE	FALSE	FALSE
10.1007/s40841-016-0053-0			closed	Does Knowledge Matter? Disciplinary Identities and Studentsâ€™ Readiness for University	Mcphail, Graham J.	1	No	New Zealand Journal of Educational Studies	2017	Springer Nature	FALSE	journal-article		FALSE			No		0	FALSE	2199-4714	No information	No information	No information		3						USD	3000	3000		Education & Educational Research	Yes	FALSE	FALSE	FALSE	FALSE	FALSE	FALSE	FALSE	FALSE	FALSE	FALSE	FALSE	FALSE
10.1007/s40841-016-0070-z			closed	Robin Averill (ed): Mathematics and Statistics in the Middle Years: Evidence and Practice	Ell, Fiona	1	No	New Zealand Journal of Educational Studies	2017	Springer Nature	FALSE	journal-article		FALSE			No		0	FALSE	2199-4714	No information	No information	No information		0						USD	3000	3000		Education & Educational Research	Yes	FALSE	FALSE	FALSE	FALSE	FALSE	FALSE	FALSE	FALSE	FALSE	FALSE	FALSE	FALSE
10.1007/s40841-017-0080-5			closed	New Zealand Teachersâ€™ Understanding of Childhood Mild Traumatic Brain Injury: Investigating and Enhancing Teacher Knowledge and Practice	Case, Rosalind Jane Leamy; Starkey, Nicola J.; Jones, Kelly; Barker-Collo, Suzanne; Feigin, Valery	5	No	New Zealand Journal of Educational Studies	2017	Springer Nature	FALSE	journal-article		FALSE			No		0	FALSE	2199-4714	No information	No information	No information		3						USD	3000	3000		Education & Educational Research	No	FALSE	FALSE	FALSE	FALSE	FALSE	FALSE	FALSE	FALSE	FALSE	FALSE	FALSE	FALSE
10.1007/s40841-017-0087-y			closed	Getting Real: Is Realism a Blind Spot in Research Methodology?	Mcphail, Graham; Lourie, Megan	2	No	New Zealand Journal of Educational Studies	2017	Springer Nature	FALSE	journal-article		FALSE			No		0	FALSE	2199-4714	No information	No information	No information		5						USD	3000	3000		Education & Educational Research	Yes	FALSE	FALSE	FALSE	FALSE	FALSE	FALSE	FALSE	FALSE	FALSE	FALSE	FALSE	FALSE
10.1007/s41127-017-0012-7			closed	Quantification and analysis of Raman spectra of graphene materials	Mohan, Velram Balaji; Nieuwoudt, Michel; Jayaraman, Krishnan; Bhattacharyya, Debes	4	No	Graphene Technology	2017	Springer Nature	FALSE	journal-article		FALSE			No		0	FALSE	2365-631X	No information	No information	No information		2						USD	3000	3000			No	FALSE	FALSE	FALSE	FALSE	FALSE	FALSE	FALSE	FALSE	FALSE	FALSE	FALSE	FALSE
10.1007/s41465-017-0027-2			closed	Aging Mindfully to Minimize Cognitive Decline	Kurth, Florian; Cherbuin, Nicolas; Luders, Eileen	3	No	Journal of Cognitive Enhancement	2017	Springer Nature	FALSE	journal-article		FALSE			No		0	FALSE	2509-3304	No information	No information	No information		4						USD	3000	3000			No	FALSE	FALSE	FALSE	FALSE	FALSE	FALSE	FALSE	FALSE	FALSE	FALSE	FALSE	FALSE
10.1016/bs.alkal.2016.04.001			closed	Flavoalkaloidsâ€”Isolation, Biological Activity, and Total Synthesis	Blair, Lachlan M.; Calvert, Matthew B.; Sperry, Jonathan	3	No	The Alkaloids: Chemistry and Biology	2017	Elsevier	FALSE	book-chapter		FALSE			No		0	FALSE	1099-4831	No information	No information	No information		3											Yes	FALSE	FALSE	FALSE	FALSE	FALSE	FALSE	FALSE	FALSE	FALSE	FALSE	FALSE	FALSE
10.1016/bs.apha.2017.03.009			closed	Is the Cannabinoid CB 2 Receptor a Major Regulator of the Neuroinflammatory Axis of the Neurovascular Unit in Humans?	Kho, Dan T.; Glass, Michelle; Graham, Euan S.	3	No	Advances in Pharmacology	2017	Elsevier	FALSE	book-chapter		FALSE			No		0	FALSE	1054-3589	12 months embargo	cannot	green	CC-BY-NC-ND	0											Yes	FALSE	FALSE	FALSE	FALSE	FALSE	FALSE	FALSE	FALSE	FALSE	FALSE	FALSE	FALSE
10.1016/bs.asb.2017.01.001			closed	Scramble Competition Polygyny in Terrestrial Arthropods	Herberstein, Marie E.; Painting, Christina J.; Holwell, Gregory I.	3	No	Advances in the Study of Behavior	2017	Elsevier	FALSE	book-chapter		FALSE			No		0	FALSE	0065-3454	unknown	unknown	gray		5										Behavioral Sciences	No	FALSE	FALSE	FALSE	FALSE	FALSE	FALSE	FALSE	FALSE	FALSE	FALSE	FALSE	FALSE
10.1016/bs.mie.2017.05.001			closed	Real-Time Measurement of Cannabinoid Receptor-Mediated cAMP Signaling	Hunter, Morag R.; Finlay, David B.; Macdonald, Christa E.; Cawston, Erin E.; Grimsey, Natasha L.; Glass, Michelle	6	No	Cannabinoids and Their Receptors	2017	Elsevier	FALSE	book-chapter		FALSE			No		0	FALSE	0076-6879	cannot	cannot	white		1										Biochemistry & Molecular Biology	Yes	FALSE	FALSE	FALSE	FALSE	FALSE	FALSE	FALSE	FALSE	FALSE	FALSE	FALSE	FALSE
10.1016/j.aap.2016.10.010			closed	Predictors of older driversâ€™ involvement in rapid deceleration events	Chevalier, A.; Coxon, K.; Chevalier, A.J.; Clarke, E.; Rogers, K.; Brown, J.; Boufous, S.; Ivers, R.; Keay, L.	9	No	Accident Analysis & Prevention	2017	Elsevier BV	FALSE	journal-article		FALSE			No		0	FALSE	0001-4575	12 months embargo	cannot	green	CC-BY-NC-ND	2						USD	3300	3300	Australian Research Council; University of Sydney Equipment Grant [DP110101740]; IRT Foundation; Centre for Road Safety at Transport for New South Wales; NHMRC; NRMA-ACT Trust scholarship	Engineering; Public, Environmental & Occupational Health; Social Sciences - Other Topics; Transportation	No	FALSE	FALSE	FALSE	FALSE	FALSE	FALSE	FALSE	FALSE	FALSE	FALSE	FALSE	FALSE
10.1016/j.ab.2017.10.017			closed	In situ surface protein conjugation of small molecules for SPR immunoassays	Wang, Yijing; Partridge, Ashton; Wu, Yinqiu	3	No	Analytical Biochemistry	2017	Elsevier BV	FALSE	journal-article		FALSE			No		0	FALSE	0003-2697	12 months embargo	cannot	green	CC-BY-NC-ND	1						USD	3300	3300	New Zealand Ministry of Business Innovation and Employment (MBIE) [UOAX1201]	Biochemistry & Molecular Biology; Chemistry	No	FALSE	FALSE	FALSE	FALSE	FALSE	TRUE	FALSE	TRUE	FALSE	FALSE	FALSE	FALSE
10.1016/j.actbio.2016.10.014			closed	Multifunctional thermoresponsive designer peptide hydrogels	De Leon-Rodriguez, Luis M.; Hemar, Yacine; Mo, Guang; Mitra, Alok K.; Cornish, Jillian; Brimble, Margaret A.	6	No	Acta Biomaterialia	2017	Elsevier BV	FALSE	journal-article		FALSE			No		0	FALSE	1742-7061	12 months embargo	cannot	green	CC-BY-NC-ND	6						USD	3000	3000	China Academy of Chinese Medical Sciences; Institute of High Energy Physics	Engineering; Materials Science	Yes	FALSE	FALSE	FALSE	FALSE	FALSE	FALSE	FALSE	FALSE	FALSE	FALSE	FALSE	FALSE
10.1016/j.agee.2017.05.022	open (via crossref license)	cc-by-nc-nd	hybrid	Fungal communities are differentially affected by conventional and biodynamic agricultural management approaches in vineyard ecosystems	Morrison-Whittle, Peter; Lee, Soon A.; Goddard, Matthew R.	3	No	Agriculture, Ecosystems & Environment	2017	Elsevier BV	TRUE	journal-article		FALSE	publishedVersion	publisher	Yes	eprints.lincoln.ac.uk	1	FALSE	0167-8809	12 months embargo	cannot	green	CC-BY-NC-ND	10	https://doi.org/10.1016/j.agee.2017.05.022					USD	3600	3600	New Zealand Ministry Innovation and Employment Plant and Food Research Ltd; New Zealand Winegrowers	Agriculture; Environmental Sciences & Ecology	Yes	FALSE	FALSE	FALSE	FALSE	FALSE	FALSE	FALSE	FALSE	FALSE	FALSE	FALSE	FALSE
10.1016/j.agrformet.2017.02.023			closed	Validation and in situ application of a modified thermal dissipation probe for evaluating standing water use of a clumped bamboo: Bambusa chungii	Zhang, Zhenzhen; Zhou, Juan; Zhao, Ping; Zhao, Xiuhua; Zhu, Liwei; Ouyang, Lei; Ni, Guangyan	7	No	Agricultural and Forest Meteorology	2017	Elsevier BV	FALSE	journal-article		FALSE			No		0	FALSE	0168-1923	12 months embargo	cannot	green	CC-BY-NC-ND	3						USD	3700	3700	National Nature Science Foundation of China [41630752 31170673 41030638]; Chinese Academy of Science/State Administration of Foreign Expert Affairs	Agriculture; Forestry; Meteorology & Atmospheric Sciences	No	FALSE	FALSE	FALSE	FALSE	FALSE	FALSE	FALSE	FALSE	FALSE	FALSE	FALSE	FALSE
10.1016/j.aim.2017.04.011			closed	Answer to a 1962 question by Zappa on cosets of Sylow subgroups	Conder, Marston D.E.	1	No	Advances in Mathematics	2017	Elsevier BV	FALSE	journal-article		FALSE			No		0	FALSE	0001-8708	12 months embargo	cannot	green	CC-BY-NC-ND	1						USD	1500	1500	New Zealand's Marsden Fund [UOA1323]	Mathematics	Yes	FALSE	FALSE	FALSE	TRUE	TRUE	FALSE	FALSE	TRUE	FALSE	FALSE	FALSE	FALSE
10.1016/j.aim.2017.07.021			closed	Metric Scott analysis	Ben Yaacov, Ita\\U00Ef; Doucha, Michal; Nies, Andr\\U00E9; Tsankov, Todor	4	No	Advances in Mathematics	2017	Elsevier BV	FALSE	journal-article		FALSE			No		0	FALSE	0001-8708	12 months embargo	cannot	green	CC-BY-NC-ND	1						USD	1500	1500	Marsden fund of New Zealand [13-UOA-287]; ANR project GrupoLoco [ANR-11-JS01-008]; ANR project GAMME [ANR-14-CE25-0004]; ERC grant ANALYTIC [259527]; Franche-Comte region	Mathematics	No	FALSE	FALSE	FALSE	TRUE	TRUE	FALSE	FALSE	TRUE	FALSE	FALSE	FALSE	FALSE
10.1016/j.ajhg.2017.01.013	open (via crossref license)	elsevier-specific: oa user license	hybrid	Mutations in EXTL3 Cause Neuro-immuno-skeletal Dysplasia Syndrome	Oud, Machteld M.; Tuijnenburg, Paul; Hempel, Maja; Van Vlies, Naomi; Ren, Zemin; Ferdinandusse, Sacha; Jansen, Machiel H.; Santer, Ren\\U00E9; Johannsen, Jessika; Bacchelli, Chiara; Alders, Marielle; Li, Rui; Davies, Rosalind; Dupuis, Lucie; Cale, Catherine M.; Wanders, Ronald J.A.; Pals, Steven T.; Ocaka, Louise; James, Chela; M\\U00Fcller, Ingo; Lehmberg, Kai	38	Yes	The American Journal of Human Genetics	2017	Elsevier BV	TRUE	journal-article		FALSE	publishedVersion	publisher	Yes	pubmedcentral.nih.gov eprints.ucl.ac.uk.OAI2	2	FALSE	0002-9297	6 months embargo	cannot	yellow	CC-BY-NC-ND	16	https://doi.org/10.1016/j.ajhg.2017.01.013					USD	5000	5000	Dutch Kidney Foundation (KOUNCIL consortium) [CP11.18]; Netherlands Organization for Health Research and Development (ZonMW) [Veni-91613008]; Netherlands Organization for Scientific Research (NWO) [Vici-865.12.005]; Center of Immunodeficiencies Amsterdam; Fundacao para a Ciencia e Tecnologia [SFRH/BD/46778/2008]; National Institute for Health Research Biomedical Research Centre (NIHR BRC) at Grea…	Genetics & Heredity	No	FALSE	FALSE	FALSE	FALSE	FALSE	FALSE	FALSE	FALSE	TRUE	FALSE	FALSE	FALSE
10.1016/j.ajhg.2017.07.007	oa repository (via OAI-PMH title and first author match)		green	Long Noncoding RNAs CUPID1 and CUPID2 Mediate Breast Cancer Risk at 11q13 by Modulating the Response to DNA Damage	Betts, Joshua A.; Moradi Marjaneh, Mahdi; Al-Ejeh, Fares; Lim, Yi Chieh; Shi, Wei; Sivakumaran, Haran; Trop\\U00E9E, Romain; Patch, Ann-Marie; Clark, Michael B.; Bartonicek, Nenad; Wiegmans, Adrian P.; Hillman, Kristine M.; Kaufmann, Susanne; Bain, Amanda L.; Gloss, Brian S.; Crawford, Joanna; Kazakoff, Stephen; Wani, Shivangi; Wen, Shu W.; Day, Bryan; M\\U00F6Ller, Andreas	31	Yes	The American Journal of Human Genetics	2017	Elsevier BV	TRUE	journal-article		FALSE	publishedVersion	repository	Yes	pubmedcentral.nih.gov	1	FALSE	0002-9297	6 months embargo	cannot	yellow	CC-BY-NC-ND	9	http://europepmc.org/articles/pmc5544418					USD	5000	5000	National Health and Medical Research Council of Australia (NHMRC) [1021731 1058421]; Australian National Breast Cancer Foundation; Australian postgraduate scholarship; Australian Research Council [FT130101417]; NHMRC [APP1072662 APP1112113]; EMBO [ALTF 864-2013]; NHMRC	Genetics & Heredity	No	FALSE	FALSE	FALSE	FALSE	FALSE	FALSE	FALSE	FALSE	FALSE	FALSE	FALSE	FALSE
10.1016/j.ajo.2017.06.014			closed	The Auckland Cataract Study II: Reducing Complications by Preoperative Risk Stratification and Case Allocation in a TeachingÂ Hospital	Kim, Bia Z.; Patel, Dipika V.; Mckelvie, James; Sherwin, Trevor; Mcghee, Charles N.J.	5	No	American Journal of Ophthalmology	2017	Elsevier BV	FALSE	journal-article		FALSE			No		0	FALSE	0002-9394	12 months embargo	cannot	green	CC-BY-NC-ND	4						USD	3300	3300	UNIVERSITY OF AUCKLAND Auckland New Zealand	Ophthalmology	Yes	FALSE	FALSE	FALSE	FALSE	FALSE	FALSE	FALSE	FALSE	FALSE	FALSE	FALSE	FALSE
10.1016/j.ajog.2016.11.1049			closed	Pelvic floor morphometry and function in women with and without puborectalis avulsion in the early postpartum period	Cyr, Marie-Pierre; Kruger, Jennifer; Wong, Vivien; Dumoulin, Chantale; Girard, Isabelle; Morin, M\\U00E9Lanie	6	No	American Journal of Obstetrics and Gynecology	2017	Elsevier BV	FALSE	journal-article		FALSE			No		0	FALSE	0002-9378	12 months embargo	cannot	green	CC-BY-NC-ND	7						USD	3550	3550	International Continence Society	Obstetrics & Gynecology	No	FALSE	FALSE	FALSE	FALSE	FALSE	FALSE	FALSE	FALSE	FALSE	FALSE	FALSE	FALSE
10.1016/j.ajog.2016.12.013			closed	Reply	Wise, Michelle R.; Farquhar, Cynthia M.	2	No	American Journal of Obstetrics and Gynecology	2017	Elsevier BV	FALSE	journal-article		FALSE			No		0	FALSE	0002-9378	12 months embargo	cannot	green	CC-BY-NC-ND	0						USD	3550	3550		Obstetrics & Gynecology	Yes	FALSE	FALSE	FALSE	FALSE	FALSE	FALSE	FALSE	FALSE	FALSE	FALSE	FALSE	FALSE
10.1016/j.ajog.2017.01.014			closed	Enoxaparin for the prevention of preeclampsia andÂ intrauterine growth restriction in women withÂ aÂ history:Â aÂ randomized trial	Groom, Katie M.; Mccowan, Lesley M.; Mackay, Laura K.; Lee, Arier C.; Said, Joanne M.; Kane, Stefan C.; Walker, Susan P.; Van Mens, Thijs E.; Hannan, Natalie J.; Tong, Stephen; Chamley, Larry W.; Stone, Peter R.; Mclintock, Claire; Groom, K.; Mccowan, L.; Mackay, L.; Lee, A.; Stone, P.; Chamley, L.; Mclintock, C.; Said, J.	29	Yes	American Journal of Obstetrics and Gynecology	2017	Elsevier BV	FALSE	journal-article		FALSE			No		0	FALSE	0002-9378	12 months embargo	cannot	green	CC-BY-NC-ND	14						USD	3550	3550	University of Auckland Faculty Research Development [3625687/9803 3624720/9803]; A+ Trust; Auckland District Health Board Charitable Trust [A+2011056]; Australasian Society of Thrombosis and Hemostasis Scientific and Education Trust [3708366/9103]; University of Auckland School of Medicine Performance Based Research [71603/9450]	Obstetrics & Gynecology	Yes	FALSE	FALSE	FALSE	FALSE	FALSE	FALSE	FALSE	FALSE	FALSE	FALSE	FALSE	FALSE
10.1016/j.algal.2016.11.002			closed	Potential of five different isolated colonial algal species for wastewater treatment and biomass energy production	Mehrabadi, Abbas; Farid, Mohammed M.; Craggs, Rupert	3	No	Algal Research	2017	Elsevier BV	FALSE	journal-article		FALSE			No		0	FALSE	2211-9264	12 months embargo	cannot	green	CC-BY-NC-ND	5						USD	2500	2500	National Institute of Water and Atmospheric Research Ltd. (NIWA) through a New Zealand Ministry of Business Innovation and Employment grant [C01X0810]	Biotechnology & Applied Microbiology	Yes	FALSE	FALSE	FALSE	FALSE	FALSE	TRUE	FALSE	TRUE	FALSE	FALSE	FALSE	FALSE
10.1016/j.algal.2016.12.010			closed	Effect of CO2 addition on biomass energy yield in wastewater treatment high rate algal mesocosms	Mehrabadi, Abbas; Farid, Mohammed M.; Craggs, Rupert	3	No	Algal Research	2017	Elsevier BV	FALSE	journal-article		FALSE			No		0	FALSE	2211-9264	12 months embargo	cannot	green	CC-BY-NC-ND	4						USD	2500	2500	National Institute of Water and Atmospheric Research Ltd. (NIWA) through a New Zealand Ministry of Business Innovation and Employment grant [C01X0810]	Biotechnology & Applied Microbiology	Yes	FALSE	FALSE	FALSE	FALSE	FALSE	TRUE	FALSE	TRUE	FALSE	FALSE	FALSE	FALSE
10.1016/j.algal.2017.01.002			closed	A comparative assessment of microwave assisted (MAE) and conventional solid-liquid (SLE) techniques for the extraction of phloroglucinol from brown seaweed	Magnusson, Marie; Yuen, Alexander K.L.; Zhang, Rui; Wright, Jeffrey T.; Taylor, Richard B.; Maschmeyer, Thomas; De Nys, Rocky	7	No	Algal Research	2017	Elsevier BV	FALSE	journal-article		FALSE			No		0	FALSE	2211-9264	12 months embargo	cannot	green	CC-BY-NC-ND	7						USD	2500	2500	Australian Government through the Advanced Manufacturing Cooperative Research Centre (AM-CRC) through Australian Government's Cooperative Research Centre Scheme [DP109602]; Science and Industry Endowment Fund [SIEF RP03-028]	Biotechnology & Applied Microbiology	No	FALSE	FALSE	FALSE	FALSE	FALSE	FALSE	FALSE	FALSE	FALSE	FALSE	FALSE	FALSE
10.1016/j.aller.2016.10.013	oa repository (via OAI-PMH title and first author match)		green	Global Asthma Network survey suggests more national asthma strategies could reduce burden of asthma	Asher, I.; Haahtela, T.; Selroos, O.; Ellwood, P.; Ellwood, E.	5	No	Allergologia et Immunopathologia	2017	Elsevier BV	TRUE	journal-article		FALSE	submittedVersion	repository	Yes	openaccess.sgul.ac.uk	1	FALSE	0301-0546	12 months embargo	cannot	green	CC-BY-NC-ND	6	http://openaccess.sgul.ac.uk/108391/1/AI%2DS%2D16%2D00168_submitted_paper.pdf					USD	3000	3000	International Union against Tuberculosis and Lung Disease	Allergy; Immunology	Yes	FALSE	FALSE	FALSE	FALSE	FALSE	FALSE	FALSE	FALSE	FALSE	FALSE	FALSE	FALSE
10.1016/j.amepre.2017.01.042			closed	Positive Psychosocial Factors in Childhood Predicting Lower Risk for Adult Type 2 Diabetes: The Cardiovascular Risk in Young Finns Study, 1980â€“2012	Pulkki-R\\U00E5Back, Laura; Elovainio, Marko; Hakulinen, Christian; Lipsanen, Jari; Kubzansky, Laura D.; Hintsanen, Mirka; Savelieva, Kateryna; Serlachius, Anna; Magnussen, Costan G.; Sabin, Matthew A.; Burgner, David P.; Lehtim\\U00E4Ki, Terho; Jokinen, Eero; R\\U00F6Nnemaa, Tapani; Mikkil\\U00E4, Vera; Jula, Antti; Hutri-K\\U00E4H\\U00F6Nen, Nina; Viikari, Jorma; Keltikangas-J\\U00E4Rvinen, Lii…	21	Yes	American Journal of Preventive Medicine	2017	Elsevier BV	FALSE	journal-article		FALSE			No		0	FALSE	0749-3797	12 months embargo	cannot	green	CC-BY-NC-ND	2						USD	2500	2500	Academy of Finland [265869 258711 256977]; Social Insurance Institution of Finland; Kuopio Tampere; Turku University Hospital Medical Fund; Signe and Ane Gyllenberg Foundation; Bothnia Welfare Coalition for Research and Knowledge network through grants from the Regional Council of Ostrobothnia; Vaasa Hospital District; European Regional Development Fund; Turku University Foundation; Paavo Nurmi F…	Public, Environmental & Occupational Health; General & Internal Medicine	No	FALSE	FALSE	FALSE	FALSE	FALSE	FALSE	FALSE	FALSE	FALSE	FALSE	FALSE	FALSE
10.1016/j.amepre.2017.02.016			closed	Kidsâ€™Cam: An Objective Methodology to Study the World in Which Children Live	Signal, Louise N.; Smith, Moira B.; Barr, Michelle; Stanley, James; Chambers, Tim J.; Zhou, Jiang; Duane, Aaron; Jenkin, Gabrielle L.S.; Pearson, Amber L.; Gurrin, Cathal; Smeaton, Alan F.; Hoek, Janet; Ni Mhurchu, Cliona	13	No	American Journal of Preventive Medicine	2017	Elsevier BV	FALSE	journal-article		FALSE			No		0	FALSE	0749-3797	12 months embargo	cannot	green	CC-BY-NC-ND	18						USD	2500	2500	Health Research Council of New Zealand Programme Grant [13/724]; Science Foundation Ireland [12/RC/2289]; European Commission FP7 International Research Staff Exchange Scheme (IRSES) funding award [2011-IRSES-295157-PANAMA]	Public, Environmental & Occupational Health; General & Internal Medicine	Yes	FALSE	TRUE	FALSE	FALSE	FALSE	FALSE	FALSE	TRUE	FALSE	FALSE	FALSE	FALSE
10.1016/j.amjmed.2016.08.045	open (via free pdf)		bronze	Dietary Management of Gout: What is the Evidence?	Kulasegaran, Tivya; Dalbeth, Nicola	2	No	The American Journal of Medicine	2017	Elsevier BV	TRUE	journal-article		FALSE	publishedVersion	publisher	No		0	FALSE	0002-9343	12 months embargo	cannot	green	CC-BY-NC-ND	0	http://www.amjmed.com/article/S0002934316309615/pdf					USD	3550	3550	Health Research Council of New Zealand	General & Internal Medicine	No	FALSE	TRUE	FALSE	FALSE	FALSE	FALSE	FALSE	TRUE	FALSE	FALSE	FALSE	FALSE
10.1016/j.anai.2017.02.021	open (via crossref license)	cc-by-nc-nd	hybrid	Associations between caesarean delivery and allergic outcomes	Loo, Evelyn Xiu Ling; Sim, Jordan Zheng Ting; Loy, See Ling; Goh, Anne; Chan, Yiong Huak; Tan, Kok Hian; Yap, Fabian; Gluckman, Peter D.; Godfrey, Keith M.; Van Bever, Hugo; Lee, Bee Wah; Chong, Yap Seng; Shek, Lynette Pei-Chi; Koh, Mark Jean Aan; Ang, Seng Bin	15	No	Annals of Allergy, Asthma & Immunology	2017	Elsevier BV	TRUE	journal-article		FALSE	publishedVersion	publisher	Yes	eprints.soton.ac.uk pubmedcentral.nih.gov	2	FALSE	1081-1206	12 months embargo	cannot	green	CC-BY-NC-ND	1	https://doi.org/10.1016/j.anai.2017.02.021					USD	3000	3000	Singapore National Research Foundation under its Translational and Clinical Research Flagship Programme [NMRC/TCR/004-NUS/2008 NMRC/TCR/012-NUHS/2014]; National Medical Research Council [NMRC/CSA/022/2010 NRF370062-HUJ-NUS 10]; Singapore Institute for Clinical Sciences Agency for Science Technology and Research Singapore; National Institute for Health Research through the National Institute for H…	Allergy; Immunology	No	FALSE	FALSE	FALSE	FALSE	FALSE	FALSE	FALSE	FALSE	TRUE	FALSE	FALSE	FALSE
10.1016/j.anbehav.2017.01.003			closed	Fish use colour to learn compound visual signals	Newport, Cait; Green, Naomi F.; Mcclure, Eva C.; Osorio, Daniel C.; Vorobyev, Misha; Marshall, N. Justin; Cheney, Karen L.	7	No	Animal Behaviour	2017	Elsevier BV	FALSE	journal-article		FALSE			No		0	FALSE	0003-3472	12 months embargo	cannot	green	CC-BY-NC-ND	5						USD	2400	2400	Australian Research Council [DP110105389 DP150102710]	Behavioral Sciences; Zoology	No	FALSE	FALSE	FALSE	FALSE	FALSE	FALSE	FALSE	FALSE	FALSE	FALSE	FALSE	FALSE
10.1016/j.ancene.2017.05.003			closed	Reef island dynamics and mechanisms of change in Huvadhoo Atoll, Republic of Maldives, Indian Ocean	Aslam, Mohamed; Kench, Paul S.	2	No	Anthropocene	2017	Elsevier BV	FALSE	journal-article		FALSE			No		0	FALSE	2213-3054	12 months embargo	cannot	green	CC-BY-NC-ND	7					2500	USD	2500	2500		Environmental Sciences & Ecology; Physical Geography; Geology	Yes	FALSE	FALSE	FALSE	FALSE	FALSE	FALSE	FALSE	FALSE	FALSE	FALSE	FALSE	FALSE
10.1016/j.aos.2017.08.005			closed	The economic consequences associated with integrated report quality: Capital market and real effects	Barth, Mary E.; Cahan, Steven F.; Chen, Li; Venter, Elmar R.	4	No	Accounting, Organizations and Society	2017	Elsevier BV	FALSE	journal-article		FALSE			No		0	FALSE	0361-3682	24 months embargo	cannot	green	CC-BY-NC-ND	29						USD	1800	1800	Chartered Institute of Management Accountants (CIMA); University of Auckland Business School	Business & Economics	No	FALSE	FALSE	FALSE	FALSE	FALSE	FALSE	FALSE	FALSE	FALSE	FALSE	FALSE	FALSE
10.1016/j.apenergy.2017.01.060			closed	Benefits of PCM underfloor heating with PCM wallboards for space heating in winter	Devaux, Paul; Farid, Mohammed Mehdi	2	No	Applied Energy	2017	Elsevier BV	FALSE	journal-article		FALSE			No		0	FALSE	0306-2619	12 months embargo	cannot	green	CC-BY-NC-ND	24						USD	3300	3300	Ministry of Business and Innovation of New Zealand; Royal Society of New Zealand; European Commission [PIRSES-GA-2013-610692]	Energy & Fuels; Engineering	Yes	FALSE	FALSE	FALSE	FALSE	TRUE	TRUE	FALSE	TRUE	FALSE	FALSE	FALSE	FALSE
10.1016/j.apgeog.2017.04.008			closed	Using geomorphic understanding of catchment-scale process relationships to support the management of river futures: MacaÃ© Basin, Brazil	Mar\\U00E7Al, M\\U00F4Nica; Brierley, Gary; Lima, Raphael	3	No	Applied Geography	2017	Elsevier BV	FALSE	journal-article		FALSE			No		0	FALSE	0143-6228	12 months embargo	cannot	green	CC-BY-NC-ND	5						USD	2300	2300	Brazilian Research Council [CNPq - 473542/2012-9]; Rio de Janeiro Research Foundation [FAPERJ - E-26/110.883/2013]	Geography	No	FALSE	FALSE	FALSE	FALSE	FALSE	FALSE	FALSE	FALSE	FALSE	FALSE	FALSE	FALSE
10.1016/j.apm.2017.02.009			closed	Bending analysis of thin functionally graded plate under in-plane stiffness variations	Amirpour, Maedeh; Das, Raj; Saavedra Flores, Erick I.	3	No	Applied Mathematical Modelling	2017	Elsevier BV	FALSE	journal-article		FALSE			No		0	FALSE	0307-904X	12 months embargo	cannot	green	CC-BY-NC-ND	8						USD	1500	1500	University of Auckland New Zealand; Zonta International Foundation USA	Engineering; Mathematics; Mechanics	Yes	FALSE	FALSE	FALSE	FALSE	FALSE	FALSE	FALSE	FALSE	FALSE	FALSE	FALSE	FALSE
10.1016/j.apmr.2017.01.010			closed	Work Limitations 4 Years After Mild Traumatic Brain Injury: A Cohort Study	Theadom, Alice; Barker-Collo, Suzanne; Jones, Kelly; Kahan, Michael; Te Ao, Braden; Mcpherson, Kathryn; Starkey, Nicola; Feigin, Valery; Feigin, Valery; Theadom, Alice; Barker-Collo, Suzanne; Mcpherson, Kathryn; Kydd, Robert; Barber, P. Alan; Parag, Varsha; Brown, Paul; Starkey, Nicola; Dowell, Anthony; Kahan, Michael; Ameratunga, Shanthi; Christey, Grant	25	Yes	Archives of Physical Medicine and Rehabilitation	2017	Elsevier BV	FALSE	journal-article		FALSE			No		0	FALSE	0003-9993	12 months embargo	cannot	green	CC-BY-NC-ND	8						USD	3300	3300	Health Research Council of New Zealand [09/063A 11/192 13/408]	Rehabilitation; Sport Sciences	No	FALSE	TRUE	FALSE	FALSE	FALSE	FALSE	FALSE	TRUE	FALSE	FALSE	FALSE	FALSE
10.1016/j.apmt.2017.03.003			closed	Direct laser scribed graphene/PVDF-HFP composite electrodes with improved mechanical water wear and their electrochemistry	Xu, Guangyuan; Aydemir, Nihan; Kilmartin, Paul A.; Travas-Sejdic, Jadranka	4	No	Applied Materials Today	2017	Elsevier BV	FALSE	journal-article		FALSE			No		0	FALSE	2352-9407	No information	No information	No information		6						USD	2100	2100	Ministry of Business Innovation and Employment [UOAX1201]; University of Auckland	Materials Science	Yes	FALSE	FALSE	FALSE	FALSE	FALSE	TRUE	FALSE	TRUE	FALSE	FALSE	FALSE	FALSE
10.1016/j.appet.2017.06.032			closed	See food diet? Cultural differences in estimating fullness and intake as a function of plate size	Peng, Mei; Adam, Sarah; Hautus, Michael J.; Shin, Myoungju; Duizer, Lisa M.; Yan, Huiquan	6	No	Appetite	2017	Elsevier BV	FALSE	journal-article		FALSE			No		0	FALSE	0195-6663	12 months embargo	cannot	green	CC-BY-NC-ND	5					2600	USD	2800	2800		Behavioral Sciences; Nutrition & Dietetics	Yes	FALSE	FALSE	FALSE	FALSE	FALSE	FALSE	FALSE	FALSE	FALSE	FALSE	FALSE	FALSE
10.1016/j.applthermaleng.2016.10.037			closed	Composite of wood-plastic and micro-encapsulated phase change material (MEPCM) used for thermal energy storage	Jamekhorshid, A.; Sadrameli, S.M.; Barzin, R.; Farid, M.M.	4	No	Applied Thermal Engineering	2017	Elsevier BV	FALSE	journal-article		FALSE			No		0	FALSE	1359-4311	12 months embargo	cannot	green	CC-BY-NC-ND	14						USD	2850	2850	Research Department of Tarbiat Modares University	Thermodynamics; Energy & Fuels; Engineering; Mechanics	No	FALSE	FALSE	FALSE	FALSE	FALSE	FALSE	FALSE	FALSE	FALSE	FALSE	FALSE	FALSE
10.1016/j.applthermaleng.2016.12.127			closed	Experimental and comprehensive theoretical study of cold storage packages containing PCM	Kozak, Yoram; Farid, Mohammed; Ziskind, Gennady	3	No	Applied Thermal Engineering	2017	Elsevier BV	FALSE	journal-article		FALSE			No		0	FALSE	1359-4311	12 months embargo	cannot	green	CC-BY-NC-ND	10						USD	2850	2850	Royal Society of New Zealand; European Commission [PIRSES-GA-2013-610692]; European Union [657466]	Thermodynamics; Energy & Fuels; Engineering; Mechanics	No	FALSE	FALSE	FALSE	FALSE	TRUE	FALSE	FALSE	TRUE	FALSE	FALSE	FALSE	FALSE
10.1016/j.applthermaleng.2017.03.020			closed	Corrigendum to â€œComposite of wood-plastic and micro-encapsulated phase change material (MEPCM) used for thermal energy storageâ€ [Appl. Therm. Eng. 112 (2017) 82â€“88]	Jamekhorshid, A.; Sadrameli, S.M.; Barzin, R.; Farid, M.M.	4	No	Applied Thermal Engineering	2017	Elsevier BV	FALSE	journal-article		FALSE			No		0	FALSE	1359-4311	12 months embargo	cannot	green	CC-BY-NC-ND	1						USD	2850	2850		Thermodynamics; Energy & Fuels; Engineering; Mechanics	No	FALSE	FALSE	FALSE	FALSE	FALSE	FALSE	FALSE	FALSE	FALSE	FALSE	FALSE	FALSE
10.1016/j.applthermaleng.2017.05.001			closed	Efficacy of using slurry of metal-coated microencapsulated PCM for cooling in a micro-channel heat exchanger	Roberts, Nathan S.; Al-Shannaq, Refat; Kurdi, Jamal; Al-Muhtaseb, Shaheen A.; Farid, Mohammed M.	5	No	Applied Thermal Engineering	2017	Elsevier BV	FALSE	journal-article		FALSE			No		0	FALSE	1359-4311	12 months embargo	cannot	green	CC-BY-NC-ND	21						USD	2850	2850	Qatar National Research Fund [NPRP 5-093-2-034]	Thermodynamics; Energy & Fuels; Engineering; Mechanics	No	FALSE	FALSE	FALSE	FALSE	FALSE	FALSE	FALSE	FALSE	FALSE	FALSE	FALSE	FALSE
10.1016/j.applthermaleng.2017.07.049			closed	Supercritical CO 2 as heat transfer fluid: A review	Cabeza, Luisa F.; De Gracia, Alvaro; Fern\\U00E1Ndez, A. In\\U00E9S; Farid, Mohammed M.	4	No	Applied Thermal Engineering	2017	Elsevier BV	FALSE	journal-article		FALSE			No		0	FALSE	1359-4311	12 months embargo	cannot	green	CC-BY-NC-ND	24						USD	2850	2850	Spanish government [ENE2015-64117-C5-1-R ENE2015-64117-C5-3-R]; European Commission Seventh Framework Programme [PIRSES-GA-2013-610692]; European Union's Horizon research and innovation programme [657466]; Royal Society of New Zealand; Ministerio de Economia y Competitividad de Espana [FJCI-2014-19940]; Catalan Government [2014 SGR 123]	Thermodynamics; Energy & Fuels; Engineering; Mechanics	No	FALSE	FALSE	FALSE	FALSE	TRUE	FALSE	FALSE	TRUE	FALSE	FALSE	FALSE	FALSE
10.1016/j.apr.2016.07.012			closed	Source apportionment of air pollutants in the Greater Auckland Region of New Zealand using receptor models and elemental levels in the lichen, Parmotrema reticulatum	Boamponsem, Louis K.; De Freitas, C.R.; Williams, David	3	No	Atmospheric Pollution Research	2017	Elsevier BV	FALSE	journal-article		FALSE			No		0	FALSE	1309-1042	No information	No information	No information		4						USD	1500	1500	School of Environment PhD contestable Research Fund [5756253]	Environmental Sciences & Ecology	Yes	FALSE	FALSE	FALSE	FALSE	FALSE	FALSE	FALSE	FALSE	FALSE	FALSE	FALSE	FALSE
10.1016/j.aquaculture.2016.11.031			closed	Assessment of heat shock and laboratory virus challenges to selectively breed for ostreid herpesvirus 1 (OsHV-1) resistance in the Pacific oyster, Crassostrea gigas	Camara, Mark D.; Yen, Seiha; Kaspar, Heinrich F.; Kesarcodi-Watson, Aditya; King, Nick; Jeffs, Andrew G.; Tremblay, Louis A.	7	No	Aquaculture	2017	Elsevier BV	FALSE	journal-article		FALSE			No		0	FALSE	0044-8486	12 months embargo	cannot	green	CC-BY-NC-ND	4					3600	USD	3600	3600	Sustainable Farming Fund of the New Zealand Ministry for Primary Industries contract 'Oyster Industry Modernisation Project' [SFF 12/006]; New Zealand Ministry of Business Innovation and Employment [CAWX1315 CAWX0802]; Pacific Marine Farms Ltd.	Fisheries; Marine & Freshwater Biology	No	FALSE	FALSE	FALSE	FALSE	FALSE	TRUE	FALSE	TRUE	FALSE	FALSE	FALSE	FALSE
10.1016/j.aquaculture.2017.06.038			closed	Phenotypic biomarkers in selectively-bred families of the Greenshellâ„¢ mussel ( Perna canaliculus ): Anaerobic enzyme and shell gape behaviour as biomarkers of prolonged emersion tolerance	Powell, J.A.; Ragg, N.L.C.; Dunphy, B.J.	3	No	Aquaculture	2017	Elsevier BV	FALSE	journal-article		FALSE			No		0	FALSE	0044-8486	12 months embargo	cannot	green	CC-BY-NC-ND	2					3600	USD	3600	3600	New Zealand government's Ministry of Business Innovation and Employment through the Cawthron Cultured Shellfish Programme [CAWX1315]; University of Auckland's SBS internal fund [4024/12064]	Fisheries; Marine & Freshwater Biology	Yes	FALSE	FALSE	FALSE	FALSE	FALSE	TRUE	FALSE	TRUE	FALSE	FALSE	FALSE	FALSE
10.1016/j.aquatox.2017.02.008			closed	Assessing the potential for trace organic contaminants commonly found in Australian rivers to induce vitellogenin in the native rainbowfish ( Melanotaenia fluviatilis ) and the introduced mosquitofish ( Gambusia holbrooki )	Scott, Philip D.; Coleman, Heather M.; Colville, Anne; Lim, Richard; Matthews, Benjamin; Mcdonald, James A.; Miranda, Ana; Neale, Peta A.; Nugegoda, Dayanthi; Tremblay, Louis A.; Leusch, Frederic D.L.	11	No	Aquatic Toxicology	2017	Elsevier BV	FALSE	journal-article		FALSE			No		0	FALSE	0166-445X	12 months embargo	cannot	green	CC-BY-NC-ND	2						USD	3700	3700	Australian Research Council (ARC Linkage scheme) [LP100100163]; Water Research Australia; Australian Postgraduate Award (Industry) scholarship; Water Research Australia PhD top-up scholarship; Sydney Water; Seqwater; Melbourne Water	Marine & Freshwater Biology; Toxicology	No	FALSE	FALSE	FALSE	FALSE	FALSE	FALSE	FALSE	FALSE	FALSE	FALSE	FALSE	FALSE
10.1016/j.arth.2017.05.058			closed	Tranexamic Acid in Knee Surgery Studyâ€”A Multicentered, Randomized, Controlled Trial	Stowers, Marinus D.J.; Aoina, James; Vane, Andrew; Poutawera, Vaughan; Hill, Andrew G.; Munro, Jacob T.	6	No	The Journal of Arthroplasty	2017	Elsevier BV	FALSE	journal-article		FALSE			No		0	FALSE	0883-5403	12 months embargo	cannot	green	CC-BY-NC-ND	8						USD	2750	2750	Ko Awatea; Counties Manukau District Health Board	Orthopedics	No	FALSE	FALSE	FALSE	FALSE	FALSE	FALSE	FALSE	FALSE	FALSE	FALSE	FALSE	FALSE
10.1016/j.asoc.2016.11.036			closed	Learned Action SLAM: Sharing SLAM through learned path planning information between heterogeneous robotic platforms	Williams, Henry; Browne, Will N.; Carnegie, Dale A.	3	No	Applied Soft Computing	2017	Elsevier BV	FALSE	journal-article		FALSE			No		0	FALSE	1568-4946	12 months embargo	cannot	green	CC-BY-NC-ND	2						USD	2400	2400		Computer Science	Yes	FALSE	FALSE	FALSE	FALSE	FALSE	FALSE	FALSE	FALSE	FALSE	FALSE	FALSE	FALSE
10.1016/j.asoc.2017.07.039			closed	Analysis and validation of wavelet transform based DC fault detection in HVDC system	Yeap, Yew Ming; Geddada, Nagesh; Ukil, Abhisek	3	No	Applied Soft Computing	2017	Elsevier BV	FALSE	journal-article		FALSE			No		0	FALSE	1568-4946	12 months embargo	cannot	green	CC-BY-NC-ND	9						USD	2400	2400	Nanyang Technological University Singapore [M4081547.040]	Computer Science	No	FALSE	FALSE	FALSE	FALSE	FALSE	FALSE	FALSE	FALSE	FALSE	FALSE	FALSE	FALSE
10.1016/j.autcon.2017.04.003			closed	Retrieving similar cases for construction project risk management using Natural Language Processing techniques	Zou, Yang; Kiviniemi, Arto; Jones, Stephen W.	3	No	Automation in Construction	2017	Elsevier BV	FALSE	journal-article		FALSE			No		0	FALSE	0926-5805	12 months embargo	cannot	green	CC-BY-NC-ND	10						USD	2500	2500	University of Liverpool and China Scholarship Council [201408500090]	Construction & Building Technology; Engineering	No	FALSE	FALSE	FALSE	FALSE	FALSE	FALSE	FALSE	FALSE	FALSE	FALSE	FALSE	FALSE
10.1016/j.autneu.2016.08.002	oa repository (via OAI-PMH title and first author match)		green	Evaluating the carotid bodies and renal nerves as therapeutic targets for hypertension	Mcbryde, Fiona D.; Hart, Emma C.; Ramchandra, Rohit; Paton, Julian F.R.	4	No	Autonomic Neuroscience	2017	Elsevier BV	TRUE	journal-article		FALSE	submittedVersion	repository	Yes	research-information.bris.ac.uk	1	FALSE	1566-0702	12 months embargo	cannot	green	CC-BY-NC-ND	3	https://research-information.bristol.ac.uk/files/112767073/McBryde_et_al_Autonomic_Neurosci_Basic_Clinical.pdf					USD	2500	2500	British Heart Foundation [RG/12/6/29670 IBSRF FS/11/1/28400]; Health Research Council of New Zealand [15/086 13/014]; Royal Society Newton Fellow Scheme	Neurosciences & Neurology	Yes	FALSE	TRUE	FALSE	FALSE	FALSE	FALSE	FALSE	TRUE	FALSE	FALSE	FALSE	FALSE
10.1016/j.autneu.2017.09.003	oa repository (via OAI-PMH title and first author match)	cc-by	green	Cardiovascular autonomic regulation, inflammation and pain in rheumatoid arthritis	Adlan, Ahmed M.; Veldhuijzen Van Zanten, Jet J.C.S.; Lip, Gregory Y.H.; Paton, Julian F.R.; Kitas, George D.; Fisher, James P.	6	No	Autonomic Neuroscience	2017	Elsevier BV	TRUE	journal-article		FALSE	publishedVersion	repository	Yes	pubmedcentral.nih.gov pure.atira.dk research-information.bris.ac.uk	3	FALSE	1566-0702	12 months embargo	cannot	green	CC-BY-NC-ND	3	http://europepmc.org/articles/pmc5744865					USD	2500	2500	Arthritis Research UK [196633]	Neurosciences & Neurology	No	FALSE	FALSE	FALSE	FALSE	FALSE	FALSE	FALSE	FALSE	FALSE	FALSE	FALSE	FALSE
10.1016/j.baae.2016.12.002			closed	Stigmatic pollen delivery by flies and bees: Methods comparing multiple species within a pollinator community	Howlett, B.G.; Evans, L.J.; Pattemore, D.E.; Nelson, W.R.	4	No	Basic and Applied Ecology	2017	Elsevier BV	FALSE	journal-article		FALSE			No		0	FALSE	1439-1791	12 months embargo	cannot	green	CC-BY-NC-ND	4						USD	3000	3000	Ministry of Business Innovation and Employment [C11X1309]; Foundation for Research Science and Technology programme [CO2X0221]	Environmental Sciences & Ecology	No	FALSE	FALSE	FALSE	FALSE	FALSE	TRUE	FALSE	TRUE	FALSE	FALSE	FALSE	FALSE
10.1016/j.bandl.2016.12.001			closed	Affective speech prosody perception and production in stroke patients with left-hemispheric damage and healthy controls	Leung, Joan H.; Purdy, Suzanne C.; Tippett, Lynette J.; Le\\U00E3O, Sylvia H.S.	4	No	Brain and Language	2017	Elsevier BV	FALSE	journal-article		FALSE			No		0	FALSE	0093-934X	12 months embargo	cannot	green	CC-BY-NC-ND	2						USD	2300	2300		Audiology & Speech-Language Pathology; Linguistics; Neurosciences & Neurology; Psychology	Yes	FALSE	FALSE	FALSE	FALSE	FALSE	FALSE	FALSE	FALSE	FALSE	FALSE	FALSE	FALSE
10.1016/j.bandl.2017.07.004			closed	Reading network in dyslexia: Similar, yet different	Waldie, Karen E.; Wilson, Anna J.; Roberts, Reece P.; Moreau, David	4	No	Brain and Language	2017	Elsevier BV	FALSE	journal-article		FALSE			No		0	FALSE	0093-934X	12 months embargo	cannot	green	CC-BY-NC-ND	5						USD	2300	2300	University of Auckland; Canterbury Medical Research Foundation; University of Canterbury	Audiology & Speech-Language Pathology; Linguistics; Neurosciences & Neurology; Psychology	Yes	FALSE	FALSE	FALSE	FALSE	FALSE	FALSE	FALSE	FALSE	FALSE	FALSE	FALSE	FALSE
10.1016/j.bar.2016.10.006	oa repository (via OAI-PMH title and first author match)		green	Business strategies and management accounting in response to climate change risk exposure and regulatory uncertainty	Bui, Binh; De Villiers, Charl	2	No	The British Accounting Review	2017	Elsevier BV	TRUE	journal-article		FALSE	submittedVersion	repository	Yes	repository.up.ac.za	1	FALSE	0890-8389	24 months embargo	cannot	green	CC-BY-NC-ND	10	https://repository.up.ac.za/bitstream/2263/59401/1/Bui_Business_2017.pdf					USD	1800	1800		Business & Economics	No	FALSE	FALSE	FALSE	FALSE	FALSE	FALSE	FALSE	FALSE	FALSE	FALSE	FALSE	FALSE
10.1016/j.bbagen.2016.11.001			closed	Characterizing the mode of action of extracellular Connexin43 channel blocking mimetic peptides in an in vitro ischemia injury model	Kim, Yeri; Griffin, Jarred M.; Harris, Paul W.R.; Chan, Sin Hang Crystal; Nicholson, Louise F.B.; Brimble, Margaret A.; O\'Carroll, Simon J.; Green, Colin R.	8	No	Biochimica et Biophysica Acta (BBA) - General Subjects	2017	Elsevier BV	FALSE	journal-article		FALSE			No		0	FALSE	0304-4165	12 months embargo	cannot	green	CC-BY-NC-ND	14						USD	3800	3800	University of Auckland Doctoral Scholarship; CatWalk Spinal Cord Injury Trust; WB Hadden; Tom Cat Trust	Biochemistry & Molecular Biology; Biophysics	Yes	FALSE	FALSE	FALSE	FALSE	FALSE	FALSE	FALSE	FALSE	FALSE	FALSE	FALSE	FALSE
10.1016/j.bbi.2016.11.025	oa repository (via OAI-PMH title and first author match)		green	The effects of expressive writing before or after punch biopsy on wound healing	Robinson, Hayley; Jarrett, Paul; Vedhara, Kavita; Broadbent, Elizabeth	4	No	Brain, Behavior, and Immunity	2017	Elsevier BV	TRUE	journal-article		FALSE	submittedVersion	repository	Yes	eprints.nottingham.ac.uk	1	FALSE	0889-1591	12 months embargo	cannot	green	CC-BY-NC-ND	6	http://eprints.nottingham.ac.uk/40493/1/Robinson%20Brain%20Behav%20Immun%202016.pdf					USD	2800	2800	Medical Research Council [MC_U145079313]	Immunology; Neurosciences & Neurology; Psychiatry	Yes	FALSE	FALSE	FALSE	FALSE	FALSE	FALSE	FALSE	FALSE	FALSE	FALSE	FALSE	FALSE
10.1016/j.bbr.2017.06.040			closed	Dopamine transporter ( DAT1/SLC6A3 ) polymorphism and the association between being born small for gestational age and symptoms of ADHD	Waldie, K.E.; Cornforth, C.M.; Webb, R.E.; Thompson, J.M.D.; Murphy, R.; Moreau, D.; Slykerman, R.; Morgan, A.R.; Ferguson, L.R.; Mitchell, E.A.	10	No	Behavioural Brain Research	2017	Elsevier BV	FALSE	journal-article		FALSE			No		0	FALSE	0166-4328	12 months embargo	cannot	green	CC-BY-NC-ND	0						USD	2600	2600	Health Research Council of New Zealand; Hawkes Bay Medical Research Foundation; Child Health Research Foundation; Becroft Foundation; Auckland Medical Research Foundation; Heart Foundation; Cure Kids; Starship Foundation; Auckland District Health Board	Behavioral Sciences; Neurosciences & Neurology	Yes	FALSE	TRUE	FALSE	FALSE	FALSE	FALSE	TRUE	TRUE	FALSE	FALSE	FALSE	FALSE
10.1016/j.bbrc.2016.11.083	oa repository (via OAI-PMH title and first author match)	cc-by-nc-nd	green	Rutin suppresses human-amylin/hIAPP misfolding and oligomer formation in-vitro, and ameliorates diabetes and its impacts in human-amylin/hIAPP transgenic mice	Aitken, Jacqueline F.; Loomes, Kerry M.; Riba-Garcia, Isabel; Unwin, Richard D.; Prijic, Gordana; Phillips, Ashley S.; Phillips, Anthony R.J.; Wu, Donghai; Poppitt, Sally D.; Ding, Ke; Barran, Perdita E.; Dowsey, Andrew W.; Cooper, Garth J.S.	13	No	Biochemical and Biophysical Research Communications	2017	Elsevier BV	TRUE	journal-article		FALSE	submittedVersion	repository	Yes	research-information.bris.ac.uk pure.atira.dk	2	FALSE	0006-291X	12 months embargo	cannot	green	CC-BY-NC-ND	7	https://research-information.bristol.ac.uk/files/94740314/1_s2.0_S0006291X16319465_main_UNEDITED_MS_EPUB.pdf					USD	2200	2200	Endocore Research Trust [60147]; Maurice and Phyllis Paykel Trust [3601069]; Health Research Council of New Zealand [HRC 03/190]; Ministry of Business Innovation and Employment New Zealand (MBIE) [UOAX0815]; Maurice Wilkins Centre for Molecular Biodiscovery (Tertiary Education Commission) [9431-48507]; Lottery Health New Zealand [3354520]; Medical Research Council (UK) [MR/L010445/1 MR/L011093/1]…	Biochemistry & Molecular Biology; Biophysics	Yes	FALSE	TRUE	FALSE	FALSE	FALSE	TRUE	FALSE	TRUE	FALSE	FALSE	FALSE	FALSE
10.1016/j.bbrc.2017.05.129			closed	Archaeal Lsm rings as stable self-assembling tectons for protein nanofabrication	Wason, Akshita; Pearce, F. Grant; Gerrard, Juliet A.; Mabbutt, Bridget C.	4	No	Biochemical and Biophysical Research Communications	2017	Elsevier BV	FALSE	journal-article		FALSE			No		0	FALSE	0006-291X	12 months embargo	cannot	green	CC-BY-NC-ND	0						USD	2200	2200	U. S. Army Research Laboratory/U. S. Army Research Office [W911NF1210554]; New Zealand Synchrotron Group; Mac-Diarmid Institute for Advanced Materials and Nanotechnology (NZ)	Biochemistry & Molecular Biology; Biophysics	No	FALSE	FALSE	FALSE	FALSE	FALSE	FALSE	FALSE	FALSE	FALSE	FALSE	FALSE	FALSE
10.1016/j.bbrc.2017.10.102			closed	Stoichiometry and mechanistic implications of the MacAB-TolC tripartite efflux pump	Jo, Inseong; Hong, Seokho; Lee, Minho; Song, Saemee; Kim, Jin-Sik; Mitra, Alok K.; Hyun, Jaekyung; Lee, Kangseok; Ha, Nam-Chul	9	No	Biochemical and Biophysical Research Communications	2017	Elsevier BV	FALSE	journal-article		FALSE			No		0	FALSE	0006-291X	12 months embargo	cannot	green	CC-BY-NC-ND	1						USD	2200	2200	National Research Foundation of Korea [NRF-2017H1A2A1042661 2017R1A2B2003992 2017R1A2B2011008]	Biochemistry & Molecular Biology; Biophysics	No	FALSE	FALSE	FALSE	FALSE	FALSE	FALSE	FALSE	FALSE	FALSE	FALSE	FALSE	FALSE
10.1016/j.bcdf.2017.07.001			closed	Variability in gut microbiota response to an inulin-type fructan prebiotic within an in vitro three-stage continuous colonic model system	Healey, G.; Murphy, R.; Butts, C.; Brough, L.; Rosendale, D.; Blatchford, P.; Stoklosinski, H.; Coad, J.	8	No	Bioactive Carbohydrates and Dietary Fibre	2017	Elsevier BV	FALSE	journal-article		FALSE			No		0	FALSE	2212-6198	unknown	unknown	gray		0						USD	3000	3000			No	FALSE	FALSE	FALSE	FALSE	FALSE	FALSE	FALSE	FALSE	FALSE	FALSE	FALSE	FALSE
10.1016/j.bcp.2017.07.005	open (via crossref license)	cc-by	hybrid	Receptor activity-modifying protein dependent and independent activation mechanisms in the coupling of calcitonin gene-related peptide and adrenomedullin receptors to Gs	Woolley, Michael J.; Reynolds, Christopher A.; Simms, John; Walker, Christopher S.; Mobarec, Juan Carlos; Garelja, Michael L.; Conner, Alex C.; Poyner, David R.; Hay, Debbie L.	9	No	Biochemical Pharmacology	2017	Elsevier BV	TRUE	journal-article		FALSE	publishedVersion	publisher	Yes	repository.essex.ac.uk pubmedcentral.nih.gov	2	FALSE	0006-2952	12 months embargo	cannot	green	CC-BY-NC-ND	10	https://doi.org/10.1016/j.bcp.2017.07.005					USD	3800	3800	British Heart Foundation [PG/12/59/29795]; Royal Society of New Zealand Marsden Fund; BBSRC [BB/M000176/1 BB/M006883/1]; University of Auckland Health Doctoral Scholarship; Royal Society Industrial Fellowship	Pharmacology & Pharmacy	Yes	FALSE	FALSE	FALSE	TRUE	TRUE	FALSE	FALSE	TRUE	FALSE	FALSE	FALSE	FALSE
10.1016/j.beproc.2017.01.002			closed	Pre-asymptotic response rates as a function of the delay-of-reinforcement gradient summation for Cataniaâ€™s Operant Reserve: A reply to Berg & McDowell (2011)	Li, Don; Elliffe, Douglas; Hautus, Michael J.	3	No	Behavioural Processes	2017	Elsevier BV	FALSE	journal-article		FALSE			No		0	FALSE	0376-6357	12 months embargo	cannot	green	CC-BY-NC-ND	1						USD	2200	2200		Psychology; Behavioral Sciences; Zoology	Yes	FALSE	FALSE	FALSE	FALSE	FALSE	FALSE	FALSE	FALSE	FALSE	FALSE	FALSE	FALSE
10.1016/j.beproc.2017.01.017			closed	Predictors of aggressive response towards simulated intruders depend on context and sex in Crimson Finches ( Neochmia phaeton )	Young, Catherine Mary; Cain, Kristal Elaine; Svedin, Nina; Backwell, Patricia Ruth Yvonne; Pryke, Sarah Rosalind	5	No	Behavioural Processes	2017	Elsevier BV	FALSE	journal-article		FALSE			No		0	FALSE	0376-6357	12 months embargo	cannot	green	CC-BY-NC-ND	0						USD	2200	2200	Australian Research Council Grant; Australian Postgraduate Award; Australian Bird Study Association Fund for Avian Research	Psychology; Behavioral Sciences; Zoology	No	FALSE	FALSE	FALSE	FALSE	FALSE	FALSE	FALSE	FALSE	FALSE	FALSE	FALSE	FALSE
10.1016/j.beproc.2017.02.011			closed	No impact of repeated extinction exposures on operant responding maintained by different reinforcer rates	Bai, John Y.H.; Podlesnik, Christopher A.	2	No	Behavioural Processes	2017	Elsevier BV	FALSE	journal-article		FALSE			No		0	FALSE	0376-6357	12 months embargo	cannot	green	CC-BY-NC-ND	7						USD	2200	2200		Psychology; Behavioral Sciences; Zoology	Yes	FALSE	FALSE	FALSE	FALSE	FALSE	FALSE	FALSE	FALSE	FALSE	FALSE	FALSE	FALSE
10.1016/j.biocel.2017.04.012			closed	Moesin and merlin regulate urokinase receptor-dependent endothelial cell migration, adhesion and angiogenesis	Degryse, Bernard; Britto, Mishan; Shan, Chun Xu; Wallace, Robert G.; Rochfort, Keith D.; Cummins, Philip M.; Meade, Gerardene; Murphy, Ronan P.	8	No	The International Journal of Biochemistry & Cell Biology	2017	Elsevier BV	FALSE	journal-article		FALSE			No		0	FALSE	1357-2725	12 months embargo	cannot	green	CC-BY-NC-ND	8						USD	3800	3800	Irish Higher Education Authority Programme for Research in Third Level Institutes (HEA-PRTLI Cycle 4: T3 Targeted Therapeutics Theranostics); Health Research Board of Ireland [HRB-RP/2005/184 HRA/2009/122 HRA/2009/122/R]; Science Foundation Ireland [SFI-04/BR/B0577 11/TIDA/B1927]; International Visitor Award Dublin City University Dublin Ireland	Biochemistry & Molecular Biology; Cell Biology	No	FALSE	FALSE	FALSE	FALSE	FALSE	FALSE	FALSE	FALSE	FALSE	FALSE	FALSE	FALSE
10.1016/j.biocon.2016.06.013	open (via crossref license)	cc-by-nc-nd	hybrid	A vision for global monitoring of biological invasions	Latombe, Guillaume; Py\\U0161Ek, Petr; Jeschke, Jonathan M.; Blackburn, Tim M.; Bacher, Sven; Capinha, C\\U00E9Sar; Costello, Mark J.; Fern\\U00E1Ndez, Miguel; Gregory, Richard D.; Hobern, Donald; Hui, Cang; Jetz, Walter; Kumschick, Sabrina; Mcgrannachan, Chris; Pergl, Jan; Roy, Helen E.; Scalera, Riccardo; Squires, Zoe E.; Wilson, John R.U.; Winter, Marten; Genovesi, Piero	22	Yes	Biological Conservation	2017	Elsevier BV	TRUE	journal-article		FALSE	publishedVersion	publisher	Yes	eprints.ucl.ac.uk.OAI2 doc.rero.ch nora.nerc.ac.uk	3	FALSE	0006-3207	12 months embargo	cannot	green	CC-BY-NC-ND	39	https://doi.org/10.1016/j.biocon.2016.06.013					USD	3200	3200	National Kidney Foundation of South Africa; Monash University; Natural Environment Research Council; Directorate for Geosciences; Deutsche Forschungsgemeinschaft; Department of Environmental Affairs; Australian Research Council; DST-NRF Centre of Excellence for Invasion Biology; GrantovÃ¡ Agentura ?eskÃ© Republiky		No	FALSE	FALSE	FALSE	FALSE	FALSE	FALSE	FALSE	FALSE	FALSE	FALSE	FALSE	FALSE
10.1016/j.biocon.2016.08.024	oa repository (via OAI-PMH title and first author match)		green	Assessing the suitability of diversity metrics to detect biodiversity change	Santini, Luca; Belmaker, Jonathan; Costello, Mark J.; Pereira, Henrique M.; Rossberg, Axel G.; Schipper, Aafke M.; Ceau\\U0219U, Silvia; Dornelas, Maria; Hilbers, Jelle P.; Hortal, Joaquin; Huijbregts, Mark A.J.; Navarro, Laetitia M.; Schiffers, Katja H.; Visconti, Piero; Rondinini, Carlo	15	No	Biological Conservation	2017	Elsevier BV	TRUE	journal-article		FALSE	submittedVersion	repository	Yes	qmro.qmul.ac.uk	1	FALSE	0006-3207	12 months embargo	cannot	green	CC-BY-NC-ND	21	https://qmro.qmul.ac.uk/xmlui/bitstream/123456789/15706/1/Rossberg%20Assessing%20the%20suitability%20of%20diversity%202016%20Accepted.pdf					USD	3200	3200	European Cooperation in Science and Technology; European Cooperation in Science and Technology		No	FALSE	FALSE	FALSE	FALSE	FALSE	FALSE	FALSE	FALSE	FALSE	FALSE	FALSE	FALSE
10.1016/j.biocon.2016.10.007			closed	Ecological criteria to identify areas for biodiversity conservation	Asaad, Irawan; Lundquist, Carolyn J.; Erdmann, Mark V.; Costello, Mark J.	4	No	Biological Conservation	2017	Elsevier BV	FALSE	journal-article		FALSE			No		0	FALSE	0006-3207	12 months embargo	cannot	green	CC-BY-NC-ND	18						USD	3200	3200			Yes	FALSE	FALSE	FALSE	FALSE	FALSE	FALSE	FALSE	FALSE	FALSE	FALSE	FALSE	FALSE
10.1016/j.biocon.2017.02.044			closed	Genotype-based estimates of local abundance and effective population size for Hector's dolphins	Hamner, Rebecca M.; Constantine, Rochelle; Mattlin, Rob; Waples, Robin; Baker, C. Scott	5	No	Biological Conservation	2017	Elsevier BV	FALSE	journal-article		FALSE			No		0	FALSE	0006-3207	12 months embargo	cannot	green	CC-BY-NC-ND	2						USD	3200	3200	National Fish and Wildlife Foundation Marine Mammal Commission Fund [0307.10.020574]; DOC Sounds Area office; South Marlborough Area office; local iwi	Biodiversity & Conservation; Environmental Sciences & Ecology	Yes	FALSE	FALSE	FALSE	FALSE	FALSE	FALSE	FALSE	FALSE	FALSE	FALSE	FALSE	FALSE
10.1016/j.biocon.2017.03.013			closed	Measuring and reporting biodiversity change	Turak, Eren; Regan, Eugenie; Costello, Mark John	3	No	Biological Conservation	2017	Elsevier BV	FALSE	journal-article		FALSE			No		0	FALSE	0006-3207	12 months embargo	cannot	green	CC-BY-NC-ND	4						USD	3200	3200			No	FALSE	FALSE	FALSE	FALSE	FALSE	FALSE	FALSE	FALSE	FALSE	FALSE	FALSE	FALSE
10.1016/j.biocon.2017.03.014			closed	Disentangling the effects of fishing and environmental forcing on demographic variation in an exploited species	Teck, Sarah J.; Lorda, Julio; Shears, Nick T.; Bell, Tom W.; Cornejo-Donoso, Jorge; Caselle, Jennifer E.; Hamilton, Scott L.; Gaines, Steven D.	8	No	Biological Conservation	2017	Elsevier BV	FALSE	journal-article		FALSE			No		0	FALSE	0006-3207	12 months embargo	cannot	green	CC-BY-NC-ND	2						USD	3200	3200	David and Lucile Packard Foundation; Gordon and Betty Moore Foundation	Biodiversity & Conservation; Environmental Sciences & Ecology	No	FALSE	FALSE	FALSE	FALSE	FALSE	FALSE	FALSE	FALSE	FALSE	FALSE	FALSE	FALSE
10.1016/j.biortech.2016.12.010			closed	Hydrothermal processing of cellulose: A comparison between oxidative and non-oxidative processes	Yousefifar, Azadeh; Baroutian, Saeid; Farid, Mohammed M.; Gapes, Daniel J.; Young, Brent R.	5	No	Bioresource Technology	2017	Elsevier BV	FALSE	journal-article		FALSE			No		0	FALSE	0960-8524	12 months embargo	cannot	green	CC-BY-NC-ND	11						USD	3300	3300	Bioresource Processing Alliance [BPA 112]	Agriculture; Biotechnology & Applied Microbiology; Energy & Fuels	Yes	FALSE	FALSE	FALSE	FALSE	FALSE	FALSE	FALSE	FALSE	FALSE	FALSE	FALSE	FALSE
10.1016/j.biortech.2017.04.129			closed	Phosphate recovery from hydrothermally treated sewage sludge using struvite precipitation	Munir, M.T.; Li, Bing; Boiarkina, Irina; Baroutian, Saeid; Yu, Wei; Young, Brent R.	6	No	Bioresource Technology	2017	Elsevier BV	FALSE	journal-article		FALSE			No		0	FALSE	0960-8524	12 months embargo	cannot	green	CC-BY-NC-ND	19						USD	3300	3300	Rotorua Lakes Council (RLC)	Agriculture; Biotechnology & Applied Microbiology; Energy & Fuels	Yes	FALSE	FALSE	FALSE	FALSE	FALSE	FALSE	FALSE	FALSE	FALSE	FALSE	FALSE	FALSE
10.1016/j.biortech.2017.08.069			closed	New insights into comparison between synthetic and practical municipal wastewater in cake layer characteristic analysis of membrane bioreactor	Zhou, Lijie; Zhuang, Wei-Qin; Wang, Xin; Yu, Ke; Yang, Shufang; Xia, Siqing	6	No	Bioresource Technology	2017	Elsevier BV	FALSE	journal-article		FALSE			No		0	FALSE	0960-8524	12 months embargo	cannot	green	CC-BY-NC-ND	0						USD	3300	3300	National Key Research and Development Plan of China [2017YFC0403403]; Natural Science Foundation of China [NSFC 51678422]; Foundation of State Key Laboratory of Pollution Control and Resource Reuse (Tongji University) [PCRRT16003]; 111 Project; New Zealand Ministry of Business Innovation and Employment [CHN-UOA1601]	Agriculture; Biotechnology & Applied Microbiology; Energy & Fuels	No	FALSE	FALSE	FALSE	FALSE	FALSE	TRUE	FALSE	TRUE	FALSE	FALSE	FALSE	FALSE
10.1016/j.biortech.2017.08.164			closed	Variation in metals during wet oxidation of sewage sludge	Zhang, Zhipeng; Baroutian, Saeid; Munir, M.T.; Young, Brent R.	4	No	Bioresource Technology	2017	Elsevier BV	FALSE	journal-article		FALSE			No		0	FALSE	0960-8524	12 months embargo	cannot	green	CC-BY-NC-ND	6						USD	3300	3300	Rotorua Lakes Council (RLC)	Agriculture; Biotechnology & Applied Microbiology; Energy & Fuels	Yes	FALSE	FALSE	FALSE	FALSE	FALSE	FALSE	FALSE	FALSE	FALSE	FALSE	FALSE	FALSE
10.1016/j.bios.2017.05.049			closed	New immobilisation method for oligonucleotides on electrodes enables highly-sensitive, electrochemical label-free gene sensing	Aydemir, Nihan; Chan, Eddie; Baek, Paul; Barker, David; Williams, David E.; Travas-Sejdic, Jadranka	6	No	Biosensors and Bioelectronics	2017	Elsevier BV	FALSE	journal-article		FALSE			No		0	FALSE	0956-5663	12 months embargo	cannot	green	CC-BY-NC-ND	11						USD	3300	3300	Callaghan Innovation (Research); Tertiary Education Commission New Zealand through the MacDiarmid Institute for Advanced Materials and Nanotechnology; NZ Ministry of Business Innovation and Employment [C08X0806]	Biophysics; Biotechnology & Applied Microbiology; Chemistry; Electrochemistry; Science & Technology - Other Topics	Yes	FALSE	FALSE	FALSE	FALSE	FALSE	TRUE	FALSE	TRUE	FALSE	FALSE	FALSE	FALSE
10.1016/j.bjps.2017.03.013			closed	Pyoderma gangrenosum with pathergy: A potentially significant complication following breast reconstruction	Patel, D.K.; Locke, M.; Jarrett, P.	3	No	Journal of Plastic, Reconstructive & Aesthetic Surgery	2017	Elsevier BV	FALSE	journal-article		FALSE			No		0	FALSE	1748-6815	12 months embargo	cannot	green	CC-BY-NC-ND	2						USD	3300	3300		Surgery	No	FALSE	FALSE	FALSE	FALSE	FALSE	FALSE	FALSE	FALSE	FALSE	FALSE	FALSE	FALSE
10.1016/j.bmc.2017.05.020			closed	Recent advances in racemic protein crystallography	Yan, Bingjia; Ye, Linzhi; Xu, Weiliang; Liu, Lei	4	No	Bioorganic & Medicinal Chemistry	2017	Elsevier BV	FALSE	journal-article		FALSE			No		0	FALSE	0968-0896	12 months embargo	cannot	green	CC-BY-NC-ND	7						USD	2200	2200	National Natural Science Foundation of China [21532004 81621002 21621003]; National Key Research and Development Program of China [2017YFA0505200]	Biochemistry & Molecular Biology; Pharmacology & Pharmacy; Chemistry	No	FALSE	FALSE	FALSE	FALSE	FALSE	FALSE	FALSE	FALSE	FALSE	FALSE	FALSE	FALSE
10.1016/j.bmc.2017.06.029			closed	Structure-activity relationship studies on thiaplidiaquinones A and B as novel inhibitors of Plasmodium falciparum and farnesyltransferase	Cadelis, Melissa M.; Bourguet-Kondracki, Marie-Lise; Dubois, Jo\\U00Eblle; Kaiser, Marcel; Brunel, Jean Michel; Barker, David; Copp, Brent R.	7	No	Bioorganic & Medicinal Chemistry	2017	Elsevier BV	FALSE	journal-article		FALSE			No		0	FALSE	0968-0896	12 months embargo	cannot	green	CC-BY-NC-ND	3						USD	2200	2200		Biochemistry & Molecular Biology; Pharmacology & Pharmacy; Chemistry	Yes	FALSE	FALSE	FALSE	FALSE	FALSE	FALSE	FALSE	FALSE	FALSE	FALSE	FALSE	FALSE
10.1016/j.bmc.2017.09.025			closed	Synthesis and biological evaluation of sulfonamide analogues of the phosphatidylinositol 3-kinase inhibitor ZSTK474	Gamage, Swarna A.; Giddens, Anna C.; Tsang, Kit Y.; Flanagan, Jack U.; Kendall, Jackie D.; Lee, Woo-Jeong; Baguley, Bruce C.; Buchanan, Christina M.; Jamieson, Stephen M.F.; Shepherd, Peter R.; Denny, William A.; Rewcastle, Gordon W.	12	No	Bioorganic & Medicinal Chemistry	2017	Elsevier BV	FALSE	journal-article		FALSE			No		0	FALSE	0968-0896	12 months embargo	cannot	green	CC-BY-NC-ND	2						USD	2200	2200	Auckland Cancer Society; Health Research Council of New Zealand; Maurice Wilkins Centre for Molecular Biodiscovery; Pathway Therapeutics Inc.	Biochemistry & Molecular Biology; Pharmacology & Pharmacy; Chemistry	Yes	FALSE	TRUE	FALSE	FALSE	FALSE	FALSE	FALSE	TRUE	FALSE	FALSE	FALSE	FALSE
10.1016/j.bmcl.2016.11.059			closed	Virtual screening and biophysical studies lead to HSP90 inhibitors	Huang, Renjie; Ayine-Tora, Daniel M.; Muhammad Rosdi, M. Nasri; Li, Yu; Reynisson, J\\U00F3Hannes; Leung, Ivanhoe K.H.	6	No	Bioorganic & Medicinal Chemistry Letters	2017	Elsevier BV	FALSE	journal-article		FALSE			No		0	FALSE	0960-894X	12 months embargo	cannot	green	CC-BY-NC-ND	7						USD	2200	2200	Biochemical Society; Health Research Council of New Zealand; Neurological Foundation of New Zealand; University of Auckland Faculty Research Development Fund	Pharmacology & Pharmacy; Chemistry	Yes	FALSE	TRUE	FALSE	FALSE	FALSE	FALSE	FALSE	TRUE	FALSE	FALSE	FALSE	FALSE
10.1016/j.bmcl.2016.11.078			closed	Novel pyrazolo[1,5-a]pyridines with improved aqueous solubility as p110Î±-selective PI3 kinase inhibitors	Kendall, Jackie D.; Giddens, Anna C.; Tsang, Kit Yee; Marshall, Elaine S.; Lill, Claire L.; Lee, Woo-Jeong; Kolekar, Sharada; Chao, Mindy; Malik, Alisha; Yu, Shuqiao; Chaussade, Claire; Buchanan, Christina; Jamieson, Stephen M.F.; Rewcastle, Gordon W.; Baguley, Bruce C.; Denny, William A.; Shepherd, Peter R.	17	No	Bioorganic & Medicinal Chemistry Letters	2017	Elsevier BV	FALSE	journal-article		FALSE			No		0	FALSE	0960-894X	12 months embargo	cannot	green	CC-BY-NC-ND	2						USD	2200	2200	Health Research Council of New Zealand [06/062]; Maurice Wilkins Centre for Molecular Biodiscovery; Pathway Therapeutics Inc	Pharmacology & Pharmacy; Chemistry	Yes	FALSE	TRUE	FALSE	FALSE	FALSE	FALSE	FALSE	TRUE	FALSE	FALSE	FALSE	FALSE
10.1016/j.bmcl.2016.12.009			closed	Synthesis and antiproliferative activity of 2-chlorophenyl carboxamide thienopyridines	Van Rensburg, Michelle; Leung, Euphemia; Haverkate, Natalie A.; Eurtivong, Chatchakorn; Pilkington, Lisa I.; Reynisson, J\\U00F3Hannes; Barker, David	7	No	Bioorganic & Medicinal Chemistry Letters	2017	Elsevier BV	FALSE	journal-article		FALSE			No		0	FALSE	0960-894X	12 months embargo	cannot	green	CC-BY-NC-ND	3						USD	2200	2200	Auckland Medical Research Foundation; Auckland Cancer Society; Auckland Cancer Society Research Centre; Faculty Research Development Fund from the University of Auckland	Pharmacology & Pharmacy; Chemistry	Yes	FALSE	FALSE	FALSE	FALSE	FALSE	FALSE	TRUE	FALSE	FALSE	FALSE	FALSE	FALSE
10.1016/j.bmcl.2016.12.057	open (via crossref license)	cc-by	hybrid	Benzenesulphonamide inhibitors of the cytolytic protein perforin	Spicer, Julie A.; Miller, Christian K.; O\'Connor, Patrick D.; Jose, Jiney; Huttunen, Kristiina M.; Jaiswal, Jagdish K.; Denny, William A.; Akhlaghi, Hedieh; Browne, Kylie A.; Trapani, Joseph A.	10	No	Bioorganic & Medicinal Chemistry Letters	2017	Elsevier BV	TRUE	journal-article		FALSE	publishedVersion	publisher	Yes	pubmedcentral.nih.gov erepo.uef.fi	2	FALSE	0960-894X	12 months embargo	cannot	green	CC-BY-NC-ND	3	https://doi.org/10.1016/j.bmcl.2016.12.057					USD	2200	2200	Wellcome Trust [097767]; Auckland Division of the Cancer Society of New Zealand	Pharmacology & Pharmacy; Chemistry	Yes	FALSE	FALSE	FALSE	FALSE	FALSE	FALSE	FALSE	FALSE	FALSE	FALSE	FALSE	FALSE
10.1016/j.bmcl.2017.03.069			closed	6-Nitro-2,3-dihydroimidazo[2,1- b ][1,3]thiazoles: Facile synthesis and comparative appraisal against tuberculosis and neglected tropical diseases	Thompson, Andrew M.; Blaser, Adrian; Palmer, Brian D.; Anderson, Robert F.; Shinde, Sujata S.; Launay, Delphine; Chatelain, Eric; Maes, Louis; Franzblau, Scott G.; Wan, Baojie; Wang, Yuehong; Ma, Zhenkun; Denny, William A.	13	No	Bioorganic & Medicinal Chemistry Letters	2017	Elsevier BV	FALSE	journal-article		FALSE			No		0	FALSE	0960-894X	12 months embargo	cannot	green	CC-BY-NC-ND	10						USD	2200	2200	Global Alliance for Tuberculosis Drug Development; Drugs for Neglected Diseases initiative [UK Department for International Development]; Drugs for Neglected Diseases initiative [Dutch Ministry of Foreign Affairs]; Drugs for Neglected Diseases initiative [Federal Ministry of Education and Research (BMBF) through KfW/GERMANY]; Drugs for Neglected Diseases initiative [Bill and Melinda Gates Foundat…	Pharmacology & Pharmacy; Chemistry	Yes	FALSE	FALSE	FALSE	FALSE	FALSE	FALSE	FALSE	FALSE	FALSE	FALSE	FALSE	FALSE
10.1016/j.bmcl.2017.10.042	open (via crossref license)	cc-by	hybrid	Synthesis and evaluation of analogues of the tuberculosis drug bedaquiline containing heterocyclic B-ring units	Choi, Peter J.; Sutherland, Hamish S.; Tong, Amy S.T.; Blaser, Adrian; Franzblau, Scott G.; Cooper, Christopher B.; Lotlikar, Manisha U.; Upton, Anna M.; Guillemont, Jerome; Motte, Magali; Queguiner, Laurence; Andries, Koen; Van Den Broeck, Walter; Denny, William A.; Palmer, Brian D.	15	No	Bioorganic & Medicinal Chemistry Letters	2017	Elsevier BV	TRUE	journal-article		FALSE	publishedVersion	publisher	Yes	pubmedcentral.nih.gov	1	FALSE	0960-894X	12 months embargo	cannot	green	CC-BY-NC-ND	7	https://doi.org/10.1016/j.bmcl.2017.10.042					USD	2200	2200	Bill and Melinda Gates Foundation Seattle United States [OPP1017459]; U.S. Agency for International Development ( USAID) Ronald Reagan Building Washington DC United States [GHS-A-00-08-00012-00]; U.K. Department for International Development (DFID) Whitehall London England; Irish Aid Henry Street Limerick Eire	Pharmacology & Pharmacy; Chemistry	Yes	FALSE	FALSE	FALSE	FALSE	FALSE	FALSE	FALSE	FALSE	FALSE	FALSE	FALSE	FALSE
10.1016/j.bone.2017.06.004	oa repository (via pmcid lookup)		green	Splenomegaly, myeloid lineage expansion and increased osteoclastogenesis in osteogenesis imperfecta murine	Matthews, Brya G.; Roeder, Emilie; Wang, Xi; Aguila, Hector Leonardo; Lee, Sun-Kyeong; Grcevic, Danka; Kalajzic, Ivo	7	No	Bone	2017	Elsevier BV	TRUE	journal-article		FALSE	acceptedVersion	repository	No	no_oai_data	1	FALSE	8756-3282	12 months embargo	cannot	green	CC-BY-NC-ND	5	https://www.ncbi.nlm.nih.gov/pmc/articles/PMC5764163				2150	USD	2300	2300	NIH/NIAMS [AR066218]; Michael Geissman Fellowship from the Osteogenesis Imperfecta Foundation	Endocrinology & Metabolism	No	FALSE	FALSE	FALSE	FALSE	FALSE	FALSE	FALSE	FALSE	FALSE	FALSE	FALSE	FALSE
10.1016/j.bpc.2017.07.007	oa repository (via OAI-PMH title and first author match)		green	Rigorous analysis of static light scattering measurements on buffered protein solutions	Wills, Peter R.; Winzor, Donald J.	2	No	Biophysical Chemistry	2017	Elsevier BV	TRUE	journal-article		FALSE	submittedVersion	repository	Yes	espace.library.uq.edu.au	1	FALSE	0301-4622	24 months embargo	cannot	green	CC-BY-NC-ND	3	http://espace.library.uq.edu.au/view/UQ:678012/UQ678012_OA.pdf					USD	3300	3300		Biochemistry & Molecular Biology; Biophysics; Chemistry	Yes	FALSE	FALSE	FALSE	FALSE	FALSE	FALSE	FALSE	FALSE	FALSE	FALSE	FALSE	FALSE
10.1016/j.bpj.2017.03.019	open (via free pdf)	elsevier-specific: oa user license	bronze	Mapping Interpuff Interval Distribution to the Properties of Inositol Trisphosphate Receptors	Cao, Pengxing; Falcke, Martin; Sneyd, James	3	No	Biophysical Journal	2017	Elsevier BV	TRUE	journal-article		FALSE	publishedVersion	publisher	Yes	pubmedcentral.nih.gov	1	FALSE	0006-3495	12 months embargo	cannot	yellow		3	https://doi.org/10.1016/j.bpj.2017.03.019					USD	1800	1800	National Institute of Dental and Craniofacial Research [R01 DE019245-06]	Biophysics	Yes	FALSE	FALSE	FALSE	FALSE	FALSE	FALSE	FALSE	FALSE	FALSE	FALSE	FALSE	FALSE
10.1016/j.bpj.2017.08.055	oa repository (via pmcid lookup)		green	Cholesterol Promotes Protein Binding by Affecting Membrane Electrostatics and Solvation Properties	Doktorova, Milka; Heberle, Frederick A.; Kingston, Richard L.; Khelashvili, George; Cuendet, Michel A.; Wen, Yi; Katsaras, John; Feigenson, Gerald W.; Vogt, Volker M.; Dick, Robert A.	10	No	Biophysical Journal	2017	Elsevier BV	TRUE	journal-article		FALSE	publishedVersion	repository	No	no_oai_data	1	FALSE	0006-3495	12 months embargo	cannot	yellow		5	https://www.ncbi.nlm.nih.gov/pmc/articles/PMC5685651					USD	1800	1800	National Institutes of Health (NIH) [R01GM107013 R01GM105684 PO1DA012408]; Basic Energy Science (BES) Program; Office of Science US Department of Energy (DOE) [DEAC0500OR22725]; Scientific User Facilities Division of the Department of Energy (DOE) Office of Science	Biophysics	No	FALSE	FALSE	FALSE	FALSE	FALSE	FALSE	FALSE	FALSE	FALSE	TRUE	FALSE	TRUE
10.1016/j.brainres.2016.11.004			closed	Effects of non-target leg activation, TMS coil orientation, and limb dominance on lower limb motor cortex excitability	Smith, Marie-Claire; Stinear, James W.; Alan Barber, P.; Stinear, Cathy M.	4	No	Brain Research	2017	Elsevier BV	FALSE	journal-article		FALSE			No		0	FALSE	0006-8993	12 months embargo	cannot	green	CC-BY-NC-ND	6						USD	2200	2200	Health Research Council of New Zealand [11/270]	Neurosciences & Neurology	Yes	FALSE	TRUE	FALSE	FALSE	FALSE	FALSE	FALSE	TRUE	FALSE	FALSE	FALSE	FALSE
10.1016/j.brainresbull.2016.12.015			closed	Age-related alterations in human neocortical plasticity	Spriggs, M.J.; Cadwallader, C.J.; Hamm, J.P.; Tippett, L.J.; Kirk, I.J.	5	No	Brain Research Bulletin	2017	Elsevier BV	FALSE	journal-article		FALSE			No		0	FALSE	0361-9230	12 months embargo	cannot	green	CC-BY-NC-ND	6						USD	2200	2200	University of Auckland Faculty of Science Research Development grant; Brain Research New Zealand PhD Scholarship	Neurosciences & Neurology	Yes	FALSE	FALSE	FALSE	FALSE	FALSE	FALSE	FALSE	FALSE	FALSE	FALSE	FALSE	FALSE
10.1016/j.breast.2017.02.003			closed	Systematic review of early and long-term outcome of liver resection for metastatic breast cancer: Is there a survival benefit?	Yoo, Tae Gon; Cranshaw, Isaac; Broom, Reuben; Pandanaboyana, Sanjay; Bartlett, Adam	5	No	The Breast	2017	Elsevier BV	FALSE	journal-article		FALSE			No		0	FALSE	0960-9776	12 months embargo	cannot	green	CC-BY-NC-ND	7						USD	3000	3000			Yes	FALSE	FALSE	FALSE	FALSE	FALSE	FALSE	FALSE	FALSE	FALSE	FALSE	FALSE	FALSE
10.1016/j.breast.2017.07.003			closed	Patterns of care for ductal carcinoma in situ of the breast: Queensland's experience over a decade	Barbour, Samantha; Moore, Julie; Dunn, Nathan; Effeney, Rachel; Harden, Hazel; Mccarthy, Alexandra; Walpole, Euan; Lehman, Margot	8	No	The Breast	2017	Elsevier BV	FALSE	journal-article		FALSE			No		0	FALSE	0960-9776	12 months embargo	cannot	green	CC-BY-NC-ND	2						USD	3000	3000	Princess Alexandra Hospital	Oncology; Obstetrics & Gynecology	No	FALSE	FALSE	FALSE	FALSE	FALSE	FALSE	FALSE	FALSE	FALSE	FALSE	FALSE	FALSE
10.1016/j.brs.2017.03.008			closed	TMS measures of motor cortex function after stroke: A meta-analysis	Mcdonnell, Michelle N.; Stinear, Cathy M.	2	No	Brain Stimulation	2017	Elsevier BV	FALSE	journal-article		FALSE			No		0	FALSE	1935-861X	12 months embargo	cannot	green	CC-BY-NC-ND	28						USD	2500	2500		Neurosciences & Neurology	Yes	FALSE	FALSE	FALSE	FALSE	FALSE	FALSE	FALSE	FALSE	FALSE	FALSE	FALSE	FALSE
10.1016/j.buildenv.2017.03.010	oa repository (via OAI-PMH title and first author match)		green	Post-occupancy evaluation of a historic primary school in Spain: Comparing PMV, TSV and PD for teachers' and pupils' thermal comfort	Martinez-Molina, Antonio; Boarin, Paola; Tort-Ausina, Isabel; Vivancos, Jos\\U00E9-Luis	4	No	Building and Environment	2017	Elsevier BV	TRUE	journal-article		FALSE	publishedVersion	repository	Yes	riunet.upv.es	1	FALSE	0360-1323	12 months embargo	cannot	green	CC-BY-NC-ND	14	https://riunet.upv.es/bitstream/10251/100799/5/2017%2002%2006_B%26E_Molina-Boarin-TortAusina-Vivancos_REV4Clean.pdf					USD	2500	2500	School of Architecture and Planning The University of Auckland [16.14]	Construction & Building Technology; Engineering	No	FALSE	FALSE	FALSE	FALSE	FALSE	FALSE	FALSE	FALSE	FALSE	FALSE	FALSE	FALSE
10.1016/j.cageo.2016.09.010			closed	Spatially adaptive probabilistic computation of a sub-kilometre resolution lightning climatology for New Zealand	Etherington, Thomas R.; Perry, George L.W.	2	No	Computers & Geosciences	2017	Elsevier BV	FALSE	journal-article		FALSE			No		0	FALSE	0098-3004	12 months embargo	cannot	green	CC-BY-NC-ND	1						USD	3000	3000	University of Auckland Faculty Research Development Fund [3702237]	Computer Science; Geology	No	FALSE	FALSE	FALSE	FALSE	FALSE	FALSE	FALSE	FALSE	FALSE	FALSE	FALSE	FALSE
10.1016/j.carbon.2017.09.045			closed	Giant fullerene formation through thermal treatment of fullerene soot	Martin, Jacob W.; Mcintosh, Grant J.; Arul, Rakesh; Oosterbeek, Reece N.; Kraft, Markus; S\\U00F6Hnel, Tilo	6	No	Carbon	2017	Elsevier BV	FALSE	journal-article		FALSE			No		0	FALSE	0008-6223	12 months embargo	cannot	green	CC-BY-NC-ND	4					3500	USD	3500	3500	National Research Foundation (NRF) Prime Minister's Office Singapore under its Campus for Research Excellence and Technological Enterprise (CREATE) programme	Chemistry; Materials Science	Yes	FALSE	FALSE	FALSE	FALSE	FALSE	FALSE	FALSE	FALSE	FALSE	FALSE	FALSE	FALSE
10.1016/j.carbpol.2016.12.001			closed	Molecular structure of quinoa starch	Li, Guantian; Zhu, Fan	2	No	Carbohydrate Polymers	2017	Elsevier BV	FALSE	journal-article		FALSE			No		0	FALSE	0144-8617	12 months embargo	cannot	green	CC-BY-NC-ND	17						USD	2800	2800	Faculty Research Development Fund of the University of Auckland [3705617]	Chemistry; Polymer Science	Yes	FALSE	FALSE	FALSE	FALSE	FALSE	FALSE	FALSE	FALSE	FALSE	FALSE	FALSE	FALSE
10.1016/j.carbpol.2017.01.044			closed	Formulation of olfactory-targeted microparticles with tamarind seed polysaccharide to improve nose-to-brain transport of drugs	Yarragudi, Sasi B.; Richter, Robert; Lee, Helen; Walker, Greg F.; Clarkson, Andrew N.; Kumar, Haribalan; Rizwan, Shakila B.	7	No	Carbohydrate Polymers	2017	Elsevier BV	FALSE	journal-article		FALSE			No		0	FALSE	0144-8617	12 months embargo	cannot	green	CC-BY-NC-ND	5						USD	2800	2800	Emerging Researcher Grant; University of Otago	Chemistry; Polymer Science	Yes	FALSE	FALSE	FALSE	FALSE	FALSE	FALSE	FALSE	FALSE	FALSE	FALSE	FALSE	FALSE
10.1016/j.carbpol.2017.02.014			closed	Amylopectin molecular structure in relation to physicochemical properties of quinoa starch	Li, Guantian; Zhu, Fan	2	No	Carbohydrate Polymers	2017	Elsevier BV	FALSE	journal-article		FALSE			No		0	FALSE	0144-8617	12 months embargo	cannot	green	CC-BY-NC-ND	15						USD	2800	2800	Faculty Research Development Fund of the University of Auckland [3705617]	Chemistry; Polymer Science	Yes	FALSE	FALSE	FALSE	FALSE	FALSE	FALSE	FALSE	FALSE	FALSE	FALSE	FALSE	FALSE
10.1016/j.ccell.2017.08.002	oa repository (via pmcid lookup)		green	LMO1 Synergizes with MYCN to Promote Neuroblastoma Initiation and Metastasis	Zhu, Shizhen; Zhang, Xiaoling; Weichert-Leahey, Nina; Dong, Zhiwei; Zhang, Cheng; Lopez, Gonzalo; Tao, Ting; He, Shuning; Wood, Andrew C.; Oldridge, Derek; Ung, Choong Yong; Van Ree, Janine H.; Khan, Amish; Salazar, Brittany M.; Lummertz Da Rocha, Edroaldo; Zimmerman, Mark W.; Guo, Feng; Cao, Hong; Hou, Xiaonan; Weroha, S. John; Perez-Atayde, Antonio R.	28	Yes	Cancer Cell	2017	Elsevier BV	TRUE	journal-article		FALSE	acceptedVersion	repository	No	no_oai_data	1	FALSE	1535-6108	12 months embargo	cannot	yellow	CC-BY-NC-ND	10	https://www.ncbi.nlm.nih.gov/pmc/articles/PMC5605802					USD	5000	5000	National Cancer Institute [R00CA178189 R01 CA180692 R01 CA124709]; United States Department of Defense (DoD) [W81XWH-17-1-0498]; Alex's Lemonade Stand Foundation; CureSearch for Children's Cancer Foundation; V Foundation for Cancer Research; Fraternal Order of Eagles; Mayo Center for Biomedical Discovery; Mayo Clinic Cancer Center Center for Biomedical Discovery and Center for Individualized Medi…	Oncology; Cell Biology	No	FALSE	FALSE	FALSE	FALSE	FALSE	FALSE	FALSE	FALSE	FALSE	TRUE	FALSE	TRUE
10.1016/j.ccr.2017.09.009			closed	Advances in beryllium coordination chemistry	Perera, Lakshika C.; Raymond, Onyekachi; Henderson, William; Brothers, Penelope J.; Plieger, Paul G.	5	No	Coordination Chemistry Reviews	2017	Elsevier BV	FALSE	journal-article		FALSE			No		0	FALSE	0010-8545	12 months embargo	cannot	green	CC-BY-NC-ND	9						USD	3300	3300	Marsden Fund of the New Zealand Government [MAU1204]	Chemistry	Yes	FALSE	FALSE	FALSE	TRUE	TRUE	FALSE	FALSE	TRUE	FALSE	FALSE	FALSE	FALSE
10.1016/j.cct.2017.06.014	oa repository (via pmcid lookup)		green	A randomized controlled trial of a smoking cessation self-help intervention for dual users of tobacco cigarettes and E-cigarettes: Intervention development and research design	Meltzer, Lauren R.; Simmons, Vani N.; Sutton, Steven K.; Drobes, David J.; Quinn, Gwendolyn P.; Meade, Cathy D.; Unrod, Marina; Brandon, Karen O.; Harrell, Paul T.; Eissenberg, Thomas; Bullen, Christopher R.; Brandon, Thomas H.	12	No	Contemporary Clinical Trials	2017	Elsevier BV	TRUE	journal-article		FALSE	acceptedVersion	repository	No	no_oai_data	1	FALSE	1551-7144	12 months embargo	cannot	green	CC-BY-NC-ND	4	https://www.ncbi.nlm.nih.gov/pmc/articles/PMC5559662					USD	3300	3300	National Institute on Drug Abuse of the National Institutes of Health [R01DA037961]; National Cancer Institute designated Comprehensive Cancer Center [P30CA76292]; Biostatistics and Survey Methods Core Facilities at the H. Lee Moffitt Cancer Center and Research Institute	Research & Experimental Medicine; Pharmacology & Pharmacy	No	FALSE	FALSE	FALSE	FALSE	FALSE	FALSE	FALSE	FALSE	FALSE	TRUE	FALSE	TRUE
10.1016/j.cej.2016.12.120	oa repository (via OAI-PMH title and first author match)		green	Remediation of an aged PCP-contaminated soil by chemical oxidation under flow-through conditions	Rybnikova, V.; Singhal, N.; Hanna, K.	3	No	Chemical Engineering Journal	2017	Elsevier BV	TRUE	journal-article		FALSE	submittedVersion	repository	Yes	HAL	1	FALSE	1385-8947	12 months embargo	cannot	green	CC-BY-NC-ND	4	https://hal-univ-rennes1.archives-ouvertes.fr/hal-01475805/file/Rybnikova%20et%20al.%20-%20Remediation%20of%20an%20aged%20PCP-contaminated%20soil%20by%20ch.pdf					USD	3600	3600	ADEME Agence de l'Environnement et de la Maitrise de l'Energie; Region Bretagne [TEZ13-33]	Engineering	No	FALSE	FALSE	FALSE	FALSE	FALSE	FALSE	FALSE	FALSE	FALSE	FALSE	FALSE	FALSE
10.1016/j.cej.2017.06.073			closed	Inorganic characteristics of cake layer in A/O MBR for anaerobically digested leachate from municipal solid waste incineration plant with MAP pretreatment	Zhou, Lijie; Zhuang, Wei-Qin; Ye, Biao; De Costa, Yashika Gregory; Wang, Xin; Yu, Ke; Yi, Shan; Yang, Shufang; Xia, Siqing	9	No	Chemical Engineering Journal	2017	Elsevier BV	FALSE	journal-article		FALSE			No		0	FALSE	1385-8947	12 months embargo	cannot	green	CC-BY-NC-ND	5						USD	3600	3600	National Key Research and Development Plan of China [2017YFC0403400]; Natural Science Foundation of China [NSFC 51678422]; Foundation of State Key Laboratory of Pollution Control and Resource Reuse (Tongji University) [PCRRT16003]; the 111 Project; New Zealand Ministry of Business Innovation and Employment [CHN-UOA1601]; Faculty of Engineering PhD Scholarship	Engineering	No	FALSE	FALSE	FALSE	FALSE	FALSE	TRUE	FALSE	TRUE	FALSE	FALSE	FALSE	FALSE
10.1016/j.celrep.2017.06.079	oa journal (via doaj)	cc-by-nc-nd	gold	An Atlas of Human Regulatory T Helper-like Cells Reveals Features of Th2-like Tregs that Support a Tumorigenic Environment	Halim, Leena; Romano, Marco; Mcgregor, Reuben; Correa, Isabel; Pavlidis, Polychronis; Grageda, Nathali; Hoong, Sec-Julie; Yuksel, Muhammed; Jassem, Wayel; Hannen, Rosalind F.; Ong, Mark; Mckinney, Olivia; Hayee, Bu\\U2019Hussain; Karagiannis, Sophia N.; Powell, Nicholas; Lechler, Robert I.; Nova-Lamperti, Estefania; Lombardi, Giovanna	18	No	Cell Reports	2017	Elsevier BV	TRUE	journal-article		TRUE	publishedVersion	publisher	Yes	pubmedcentral.nih.gov qmro.qmul.ac.uk pure.atira.dk	3	TRUE	2211-1247	can	can	green	CC-BY	18	https://doi.org/10.1016/j.celrep.2017.06.079	Yes	USD	5000		USD	5000	5000	CONICYT Becas-Chile; Department of Health via National Institute for Health Research Comprehensive Biomedical Research Centre; King's College London and King's College Hospital NHS Foundation Trust; British Heart Foundation (BHF) [RG/13/12/30395]; European Union 7th Framework Programme (EU FP7); Cancer Research UK/NIHR in England; DoH in Scotland; Wales and Northern Ireland Experimental Cancer Me…	Cell Biology	No	FALSE	FALSE	FALSE	FALSE	FALSE	FALSE	FALSE	FALSE	TRUE	FALSE	FALSE	FALSE
10.1016/j.ceramint.2016.11.140			closed	Synthesis of ZrN powders by aluminum-reduction nitridation of ZrO2 powders with CaCO3 additive	Yin, Li; Jones, Mark Ian	2	No	Ceramics International	2017	Elsevier BV	FALSE	journal-article		FALSE			No		0	FALSE	0272-8842	12 months embargo	cannot	green	CC-BY-NC-ND	3						USD	2750	2750	China Scholarship Council (CSC)	Materials Science	Yes	FALSE	FALSE	FALSE	FALSE	FALSE	FALSE	FALSE	FALSE	FALSE	FALSE	FALSE	FALSE
10.1016/j.ceramint.2017.05.333			closed	Ultra-high surface area nano-porous silica from expanded perlite: Formation and characterization	Wheelwright, Walt; Cooney, Ralph P.; Ray, Sudip; Zujovic, Zoran; De Silva, Karnika	5	No	Ceramics International	2017	Elsevier BV	FALSE	journal-article		FALSE			No		0	FALSE	0272-8842	12 months embargo	cannot	green	CC-BY-NC-ND	3						USD	2750	2750	New Zealand Ministry of Business Innovation and Employment (MBIE) [UOAX1410]	Materials Science	Yes	FALSE	FALSE	FALSE	FALSE	FALSE	TRUE	FALSE	TRUE	FALSE	FALSE	FALSE	FALSE
10.1016/j.ces.2017.03.026			closed	Preparation of thermally stable composite forward osmosis hollow fiber membranes based on copoly(phthalazinone biphenyl ether sulfone) substrates	Zhang, Shouhai; Liu, Peng; Chen, Yuning; Jin, Jianyong; Hu, Lijie; Jian, Xigao	6	No	Chemical Engineering Science	2017	Elsevier BV	FALSE	journal-article		FALSE			No		0	FALSE	0009-2509	12 months embargo	cannot	green	CC-BY-NC-ND	4						USD	3300	3300	Dalian Municipal Science and Technology Plan Project [2014J11JH127]	Engineering	No	FALSE	FALSE	FALSE	FALSE	FALSE	FALSE	FALSE	FALSE	FALSE	FALSE	FALSE	FALSE
10.1016/j.ces.2017.04.013			closed	Spray drying of mixed amino acids: The effect of crystallization inhibition and humidity treatment on the particle formation	Lin, Ruohui; Woo, Meng W.; Wu, Zhangxiong; Liu, Wenjie; Ma, Jisheng; Chen, Xiao D.; Selomulya, Cordelia	7	No	Chemical Engineering Science	2017	Elsevier BV	FALSE	journal-article		FALSE			No		0	FALSE	0009-2509	12 months embargo	cannot	green	CC-BY-NC-ND	2						USD	3300	3300	Guangzhou Ling Nan Intel Enterprise Group Co. Ltd.; Guangzhou Elite Project	Engineering	No	FALSE	FALSE	FALSE	FALSE	FALSE	FALSE	FALSE	FALSE	FALSE	FALSE	FALSE	FALSE
10.1016/j.ces.2017.04.043			closed	A systematic investigation of the fouling induction phenomena with artificial crystal structures and distributions	Xiao, Jie; Li, Zhihao; Han, Jian; Pan, Fei; Woo, Meng Wai; Chen, Xiao Dong	6	No	Chemical Engineering Science	2017	Elsevier BV	FALSE	journal-article		FALSE			No		0	FALSE	0009-2509	12 months embargo	cannot	green	CC-BY-NC-ND	1						USD	3300	3300	National Natural Science Foundation of China [21406148]; National Key Research and Development Program of China [2016YFE0101200]; Natural Science Foundation of Jiangsu Province [BK20130293]; Australia-China Joint Research Centre in Future Dairy Manufacturing	Engineering	No	FALSE	FALSE	FALSE	FALSE	FALSE	FALSE	FALSE	FALSE	FALSE	FALSE	FALSE	FALSE
10.1016/j.chembiol.2017.08.003	open (via crossref license)	cc-by	hybrid	MitoNeoD: A Mitochondria-Targeted Superoxide Probe	Shchepinova, Maria M.; Cairns, Andrew G.; Prime, Tracy A.; Logan, Angela; James, Andrew M.; Hall, Andrew R.; Vidoni, Sara; Arndt, Sabine; Caldwell, Stuart T.; Prag, Hiran A.; Pell, Victoria R.; Krieg, Thomas; Mulvey, John F.; Yadav, Pooja; Cobley, James N.; Bright, Thomas P.; Senn, Hans M.; Anderson, Robert F.; Murphy, Michael P.; Hartley, Richard C.	20	No	Cell Chemical Biology	2017	Elsevier BV	TRUE	journal-article		FALSE	publishedVersion	publisher	Yes	eprints.gla.ac.uk www.repository.cam.ac.uk	2	FALSE	2451-9456	12 months embargo	cannot	green	CC-BY-NC-ND	13	https://doi.org/10.1016/j.chembiol.2017.08.003					USD	5000	5000	Biotechnology and Biological Sciences Research Council [BB/I012826/1 BB/D526310/1]; Wellcome Trust [110158/Z/15/Z 110159/Z/15/Z]; Engineering and Physical Sciences Research Council [EP/J500434/1]; Auckland Cancer Society ResearchCentre; Medical Research Council UK [MC_U105663142]; FRBM [R-16-2-1]; BHF [PG/1/84/31670]; MRC	Biochemistry & Molecular Biology	No	FALSE	FALSE	FALSE	FALSE	FALSE	FALSE	FALSE	FALSE	FALSE	FALSE	FALSE	FALSE
10.1016/j.chemosphere.2017.06.021			closed	Influence of surface chemistry of carbon materials on their interactions with inorganic nitrogen contaminants in soil and water	Padhye, Lokesh P.	1	No	Chemosphere	2017	Elsevier BV	FALSE	journal-article		FALSE			No		0	FALSE	0045-6535	12 months embargo	cannot	green	CC-BY-NC-ND	7					3000	USD	3200	3200		Environmental Sciences & Ecology	Yes	FALSE	FALSE	FALSE	FALSE	FALSE	FALSE	FALSE	FALSE	FALSE	FALSE	FALSE	FALSE
10.1016/j.chest.2016.10.054	oa repository (via pmcid lookup)		green	Cough in the Athlete	Boulet, Louis-Philippe; Turmel, Julie; Irwin, Richard S.; Altman, Kenneth W.; Barker, Alan F.; Birring, Surinder S.; Blackhall, Fiona; Bolser, Donald C.; Boulet, Louis-Philippe; Braman, Sidney S.; Brightling, Christopher; Callahan-Lyon, Priscilla; Chang, Anne B.; Cowley, Terrie; Davenport, Paul; Ebihara, Satoru; El Solh, Ali A.; Escalante, Patricio; Feinstein, Anthony; Field, Stephen K.; Fisher, …	50	Yes	Chest	2017	Elsevier BV	TRUE	journal-article		FALSE	publishedVersion	repository	No	no_oai_data	1	FALSE	0012-3692	12 months embargo	cannot	green	CC-BY-NC-ND	7	https://www.ncbi.nlm.nih.gov/pmc/articles/PMC6026250				3000	USD	3300	3300	NHLBI NIH HHS [R01 HL131716]	General & Internal Medicine; Respiratory System	No	FALSE	FALSE	FALSE	FALSE	FALSE	FALSE	FALSE	FALSE	FALSE	FALSE	FALSE	FALSE
10.1016/j.chest.2016.12.025			closed	Use of Management Pathways or Algorithms in Children With Chronic Cough	Chang, Anne B.; Oppenheimer, John J.; Weinberger, Miles M.; Rubin, Bruce K.; Weir, Kelly; Grant, Cameron C.; Irwin, Richard S.	7	No	Chest	2017	Elsevier BV	FALSE	journal-article		FALSE			No		0	FALSE	0012-3692	12 months embargo	cannot	green	CC-BY-NC-ND	11					3000	USD	3300	3300	National Health and Medical Research Council (NHMRC) [1058213]; NHMRC	General & Internal Medicine; Respiratory System	No	FALSE	FALSE	FALSE	FALSE	FALSE	FALSE	FALSE	FALSE	FALSE	FALSE	FALSE	FALSE
10.1016/j.chest.2016.12.028	oa repository (via pmcid lookup)		green	Symptomatic Treatment of Cough Among Adult Patients With Lung Cancer	Molassiotis, Alex; Smith, Jaclyn A.; Mazzone, Peter; Blackhall, Fiona; Irwin, Richard S.; Adams, Todd M.; Altman, Kenneth W.; Barker, Alan F.; Birring, Surinder S.; Blackhall, Fiona; Bolser, Donald C.; Boulet, Louis-Philippe; Braman, Sidney S.; Brightling, Christopher; Callahan-Lyon, Priscilla; Canning, Brendan J.; Chang, Anne B.; Cowley, Terrie; Davenport, Paul; Ebihara, Satoru; El Solh, Ali A.	53	Yes	Chest	2017	Elsevier BV	TRUE	journal-article		FALSE	publishedVersion	repository	No	no_oai_data	1	FALSE	0012-3692	12 months embargo	cannot	green	CC-BY-NC-ND	6	https://www.ncbi.nlm.nih.gov/pmc/articles/PMC6026217				3000	USD	3300	3300	MSD Merck	General & Internal Medicine; Respiratory System	No	FALSE	FALSE	FALSE	FALSE	FALSE	FALSE	FALSE	FALSE	FALSE	FALSE	FALSE	FALSE
10.1016/j.chest.2017.01.025			closed	Management of Children With Chronic Wet Cough and Protracted Bacterial Bronchitis	Chang, Anne B.; Oppenheimer, John J.; Weinberger, Miles M.; Rubin, Bruce K.; Grant, Cameron C.; Weir, Kelly; Irwin, Richard S.	7	No	Chest	2017	Elsevier BV	FALSE	journal-article		FALSE			No		0	FALSE	0012-3692	12 months embargo	cannot	green	CC-BY-NC-ND	25					3000	USD	3300	3300	Australian National Health Medical Research Council (NHMRC) practitioner fellowship [1058213]; NHMRC	General & Internal Medicine; Respiratory System	No	FALSE	FALSE	FALSE	FALSE	FALSE	FALSE	FALSE	FALSE	FALSE	FALSE	FALSE	FALSE
10.1016/j.chest.2017.08.009	oa repository (via OAI-PMH doi match)	cc-by	green	Pharmacological and Non-Pharmacological Treatment for Acute Cough Associated with the Common Cold. CHEST Expert Panel Report	Malesker, Mark A.; Callahan-Lyon, Priscilla; Ireland, Belinda; Irwin, Richard S.; Adams, Todd M.; Altman, Kenneth W.; Azoulay, Elie; Barker, Alan F.; Birring, Surinder S.; Blackhall, Fiona; Bolser, Donald C.; Boulet, Louis-Philippe; Braman, Sidney S.; Brightling, Christopher; Callahan-Lyon, Priscilla; Chang, Anne B.; Cot\\U00E9, Andr\\U00E9Anne; Cowley, Terrie; Davenport, Paul; Ebihara, Satoru; E…	59	Yes	Chest	2017	Elsevier BV	TRUE	journal-article		FALSE	publishedVersion	repository	Yes	oai.medsovet.elpub.ru	1	FALSE	0012-3692	12 months embargo	cannot	green	CC-BY-NC-ND	5	https://www.med-sovet.pro/jour/article/view/2859				3000	USD	3300	3300	CHEST	General & Internal Medicine; Respiratory System	No	FALSE	FALSE	FALSE	FALSE	FALSE	FALSE	FALSE	FALSE	FALSE	FALSE	FALSE	FALSE
10.1016/j.chroma.2017.09.025			closed	Additional band broadening of peptides in the first size-exclusion chromatographic dimension of an automated stop-flow two-dimensional high performance liquid chromatography	Xu, Jucai; Sun-Waterhouse, Dongxiao; Qiu, Chaoying; Zhao, Mouming; Sun, Baoguo; Lin, Lianzhu; Su, Guowan	7	No	Journal of Chromatography A	2017	Elsevier BV	FALSE	journal-article		FALSE			No		0	FALSE	0021-9673	12 months embargo	cannot	green	CC-BY-NC-ND	3						USD	3600	3600	National High Technology Research and Development Program of China (863 Program) [SS2013AA100201]; Guangzhou Science and Technology Plan Project [201604020122 2014B020204001]	Biochemistry & Molecular Biology; Chemistry	No	FALSE	FALSE	FALSE	FALSE	FALSE	FALSE	FALSE	FALSE	FALSE	FALSE	FALSE	FALSE
10.1016/j.clae.2016.11.002			closed	Compatibility of phospholipid liposomal spray with silicone hydrogel contact lens wear	Wang, Michael T.M.; Ganesalingam, Kalaivarny; Loh, Chee Seang; Alberquerque, Trisha; Al-Kanani, Suhaila; Misra, Stuti L.; Craig, Jennifer P.	7	No	Contact Lens and Anterior Eye	2017	Elsevier BV	FALSE	journal-article		FALSE			No		0	FALSE	1367-0484	12 months embargo	cannot	green	CC-BY-NC-ND	4						USD	3000	3000		Ophthalmology	Yes	FALSE	FALSE	FALSE	FALSE	FALSE	FALSE	FALSE	FALSE	FALSE	FALSE	FALSE	FALSE
10.1016/j.clae.2017.01.004			closed	Minimising instilled volume reduces the impact of fluorescein on clinical measurements of tear film stability	Mooi, Jennifer K.; Wang, Michael T.M.; Lim, Joevy; M\\U00Fcller, Andreas; Craig, Jennifer P.	5	No	Contact Lens and Anterior Eye	2017	Elsevier BV	FALSE	journal-article		FALSE			No		0	FALSE	1367-0484	12 months embargo	cannot	green	CC-BY-NC-ND	11						USD	3000	3000		Ophthalmology	Yes	FALSE	FALSE	FALSE	FALSE	FALSE	FALSE	FALSE	FALSE	FALSE	FALSE	FALSE	FALSE
10.1016/j.clae.2017.03.001			closed	Effect of lipid-based dry eye supplements on the tear film in wearers of eye cosmetics	Wang, Michael T.M.; Cho, Irene (Sung Hee); Jung, Soo Hee; Craig, Jennifer P.	4	No	Contact Lens and Anterior Eye	2017	Elsevier BV	FALSE	journal-article		FALSE			No		0	FALSE	1367-0484	12 months embargo	cannot	green	CC-BY-NC-ND	5						USD	3000	3000		Ophthalmology	Yes	FALSE	FALSE	FALSE	FALSE	FALSE	FALSE	FALSE	FALSE	FALSE	FALSE	FALSE	FALSE
10.1016/j.clbc.2016.09.001	open (via page says license)	cc-by-nc-nd	hybrid	Multimodal Assessment of Estrogen Receptor mRNA Profiles to Quantify Estrogen Pathway Activity in Breast Tumors	Muthukaruppan, Anita; Lasham, Annette; Woad, Kathryn J.; Black, Michael A.; Blenkiron, Cherie; Miller, Lance D.; Harris, Gavin; Mccarthy, Nicole; Findlay, Michael P.; Shelling, Andrew N.; Print, Cristin G.	11	No	Clinical Breast Cancer	2017	Elsevier BV	TRUE	journal-article		FALSE	publishedVersion	publisher	Yes	eprints.nottingham.ac.uk	1	FALSE	1526-8209	12 months embargo	cannot	green	CC-BY-NC-ND	1	https://doi.org/10.1016/j.clbc.2016.09.001					USD	1700	1700		Oncology	Yes	FALSE	FALSE	FALSE	FALSE	FALSE	FALSE	FALSE	FALSE	FALSE	FALSE	FALSE	FALSE
10.1016/j.clgc.2017.01.014			closed	Neoadjuvant Chemotherapy in Elderly Patients With Bladder Cancer: Oncologic Outcomes From a Single Institution Experience	Leone, Andrew R.; Zargar-Shoshtari, Kamran; Diorio, Gregory J.; Sharma, Pranav; Boulware, David; Gilbert, Scott M.; Powsang, Julio M.; Zhang, Jingsong; Sexton, Wade J.; Spiess, Philippe E.; Poch, Michael A.	11	No	Clinical Genitourinary Cancer	2017	Elsevier BV	FALSE	journal-article		FALSE			No		0	FALSE	1558-7673	12 months embargo	cannot	green	CC-BY-NC-ND	2						USD	1700	1700		Oncology; Urology & Nephrology	No	FALSE	FALSE	FALSE	FALSE	FALSE	FALSE	FALSE	FALSE	FALSE	FALSE	FALSE	FALSE
10.1016/j.clinbiomech.2017.01.003			closed	The influence of early degenerative changes on the vulnerability of articular cartilage to impact-induced injury	Workman, Joshua; Thambyah, Ashvin; Broom, Neil	3	No	Clinical Biomechanics	2017	Elsevier BV	FALSE	journal-article		FALSE			No		0	FALSE	0268-0033	12 months embargo	cannot	green	CC-BY-NC-ND	6						USD	3300	3300	Marsden Fund (Royal Society of New Zealand) [3700629]	Engineering; Orthopedics; Sport Sciences	Yes	FALSE	FALSE	FALSE	TRUE	TRUE	FALSE	FALSE	TRUE	FALSE	FALSE	FALSE	FALSE
10.1016/j.clinph.2017.04.018	open (via crossref license)	cc-by	hybrid	Alzheimer's disease disrupts alpha and beta-band resting-state oscillatory network connectivity	Koelewijn, Loes; Bompas, Aline; Tales, Andrea; Brookes, Matthew J.; Muthukumaraswamy, Suresh D.; Bayer, Antony; Singh, Krish D.	7	No	Clinical Neurophysiology	2017	Elsevier BV	TRUE	journal-article		FALSE	publishedVersion	publisher	Yes	http pubmedcentral.nih.gov cronfa.swan.ac.uk	3	FALSE	1388-2457	12 months embargo	cannot	green	CC-BY-NC-ND	9	https://doi.org/10.1016/j.clinph.2017.04.018					USD	2500	2500	BRACE; UK MEG Partnership Grant (MRC/EPSRC) [MR/K005464/1]	Neurosciences & Neurology	No	FALSE	FALSE	FALSE	FALSE	FALSE	FALSE	FALSE	FALSE	FALSE	FALSE	FALSE	FALSE
10.1016/j.clinph.2017.06.035			closed	Propriospinal cutaneous-induced EMG suppression is unaltered by anodal tDCS of healthy motor cortex	Mccambridge, Alana B.; Stinear, James W.; Peek, Sarah; Byblow, Winston D.	4	No	Clinical Neurophysiology	2017	Elsevier BV	FALSE	journal-article		FALSE			No		0	FALSE	1388-2457	12 months embargo	cannot	green	CC-BY-NC-ND	0						USD	2500	2500	Health Research Council	Neurosciences & Neurology	Yes	FALSE	FALSE	FALSE	FALSE	FALSE	FALSE	FALSE	FALSE	FALSE	FALSE	FALSE	FALSE
10.1016/j.clinph.2017.09.114			closed	Neuronopathy and neuropathy in autosomal dominant spino-cerebellar ataxia (SCA): A preliminary peripheral nerve ultrasound study	Pelosi, Luciana; Mulroy, Eoin; Rodrigues, Miriam J.; Roxburgh, Richard H.	4	No	Clinical Neurophysiology	2017	Elsevier BV	FALSE	journal-article		FALSE			No		0	FALSE	1388-2457	12 months embargo	cannot	green	CC-BY-NC-ND	1						USD	2500	2500	A+ Trust Research Grant Funding ADHB [A+7073]	Neurosciences & Neurology	No	FALSE	FALSE	FALSE	FALSE	FALSE	FALSE	FALSE	FALSE	FALSE	FALSE	FALSE	FALSE
[truncated: 12,312 more rows]
[truncated: 3 more columns]

## Sheet: Research notes
How we determined New Zealand reprint author
The data from Web of Science showed there was at least one New Zealand university address in the 'Reprint author' field.
How we determined if there was a major New Zealand funding agency
The data from Web of Science included the name of a major New Zealand funder. WoS gathers that data from the papers themselves, not from the funding agencies.
Funder names
Health Research Council of New Zealand - variant forms are Health Research Council New Zealand, Health Research Council (HRC) of New Zealand, New Zealand Health Research Council, NZ Health Research Council, Health Research Council (NZ), Health Research Council (HRC) New Zealand, Health Research Council of NZ.
Royal Society of New Zealand - variant forms are Royal Society of NZ, New Zealand Royal Society, RSNZ. Marsden Fund and Rutherford Discovery Fellowship also included.
There are many variants of Ministry of Business Innovation and Employment. The filter is based on Ministry of Business, Ministry for Business, MBIE.
[truncated: 7 more rows]

## Sheet: Data sources
Information	Source
Metadata: author(s), title, journal, ISSN, etc.	Unpaywall API
Open or closed	Unpaywall API
[truncated: 10 more rows]

## Sheet: Tables 3-7
Table 3
Author count>20	No
[truncated: 46 more rows]

## Sheet: Table 8
Table 8
[truncated: 22 more rows]

## Sheet: PT2
Author count>20	No
[truncated: 23 more rows]

[truncated: 1 more sheets: Table 10]
